# Supplementary material for: Systems pharmacology dissection of Epimedium targeting tumor microenvironment to enhance cytotoxic T lymphocyte responses in lung cancer
Source: publisher site journal article supplement (doi:10.18632/aging.202410), 2021-01-17
Supplement: Supplementary file [file aging-v13i2-202410-supplementary-material-SD2.pdf]

## SUPPLEMENTARY TABLES

**Supplementary Table 1. Candidate targets for each active compound.**

| MOL-ID | Compounds                                                       | Potential targets                                                                                                                                                                                                  |
|--------|-----------------------------------------------------------------|--------------------------------------------------------------------------------------------------------------------------------------------------------------------------------------------------------------------|
| MOL056 | Icaritin                                                        | PDE5A, NOS2, PTGS1, KCNH2, ESR1, AR, PPARG, PTGS2, NOS3, ADRB2, ESR2, MAPK14, GSK3B, CDK2, RXRB, PIM1, F7, NCOA1, KCNMA1, ABCG2, CYP19A1, CYP1B1, CREB1, DAPK1, IL2, RPS6KA3, ALOX5, ABCB1, ABCC1, NQO1, RELA, XDH |
| MOL044 | Kaempferol                                                      | ESR1, GSK3B, XDH, ABCG2, DAPK1, KCNH2, PPARG, APEX1, PIM1, NOS2, PTGS1, AR, PTGS2, ESR2, MAPK14, CDK2, PIK3CG, PGR, NOS3, F7, ALDH2, AKR1B1, CA2, CA3, CYP1B1, CYP1A2, CREB1, IL2, RPS6KA3, ALOX5, VEGFA           |
| MOL033 | Chrysoeriol                                                     | NOS2, PTGS1, ESR1, AR, PPARG, PTGS2, ESR2, MAPK14, GSK3B, CDK2, PIK3CG, PIM1, ABCG2, AKR1B1, CA3, CA9, CYP1A1, CYP1B1, CREB1, DAPK1, EP300, IL2, RPS6KA3, ALOX5, ABCB1, ABCC1, TTR, VEGFA                          |
| MOL039 | 8-Isopentenyl-kaempferol                                        | ESR2, ESR1, NOS2, AR, PPARG, PTGS2, GSK3B, CDK2, PIM1, PTGS1, F7, MAPK14, KCNMA1, KCNH2, ABCG2, ALDH2, CYP1B1, DAPK1, RPS6KA3, ALOX5, ABCB1, ABCC1, RELA, XDH                                                      |
| MOL067 | Yinyanghuo C                                                    | NOS2, ESR1, AR, PPARG, PTGS2, ESR2, MAPK14, GSK3B, CDK2, PIM1, ABCG2, AKR1B1, CYP1A1, CYP1B1, CREB1, DAPK1, EP300, IL2, RPS6KA3, ABCB1, ABCC1, TTR, VEGFA, XDH                                                     |
| MOL069 | Yinyanghuo E                                                    | ESR1, ASIC3, NOS2, AR, PPARG, PTGS2, ESR2, MAPK14, GSK3B, CDK2, PIM1, ABCG2, AKR1B1, CYP1B1, CREB1, DAPK1, IL2, ABCB1, ABCC1, TTR, VEGFA, XDH                                                                      |
| MOL074 | 8-(3-methylbut-2-enyl)-2-phenyl-chromone                        | NOS2, PTGS1, ESR1, AR, PPARG, PTGS2, NOS3, ADRB2, ESR2, MAPK14, GSK3B, CDK2, PIM1, ABCG2, CYSLTR1, CYP1A1, CYP1B1, CREB1, ABCB1, PRKDC                                                                             |
| MOL012 | (2S)-7-hydroxy-2-(4-hydroxyphenyl)-4-chromanone                 | MMP9, JUN, ABCG2, ESR1, ESR2, LDHA, MALT1, VEGFA, NOS2, PTGS1, AR, PPARG, PTGS2, ADRB2, MAPK14, GSK3B, CDK2, PIK3CG, PIM1                                                                                          |
| MOL065 | Yinyanghuo A                                                    | ASIC3, ESR1, AR, PTGS2, PIM1, CYP1B1, CREB1, DAPK1, ABCB1, ABCC1, TTR, VEGFA, XDH                                                                                                                                  |
| MOL106 | Icariin                                                         | PDE5A, APEX1, ABCG2, AKR1B1, CA12, CYP1B1, IL2, RPS6KA3, LGALS3, TYR, XDH                                                                                                                                          |
| MOL004 | 24-epicampesterol                                               | ADCY1, DHCR7, PPARG, ESR1, AR, PGR, PTGS1, CA1, CA2, CYP19A1, CYP24A1, ESR2, FGF1, ABCC4, RORC, SREBF2, VDR, GC                                                                                                    |
| MOL010 | Poriferast-5-en-3beta-ol                                        | ADCY1, DHCR7, PPARG, ESR1, AR, PGR, NR3C1, CA1, CA2, CYP19A1, CYP24A1, ESR2, ABCC4, RORC, SREBF2, VDR, GC                                                                                                          |
| MOL042 | Sitosterol                                                      | GSK3B, ESR1, AR, PGR, NR3C1, AR, CA1, CA2, CYP19A1, CYP24A1, ESR1, ESR2, ABCC4, RORC, SREBF2, VDR, GC                                                                                                              |
| MOL008 | Linoleyl acetate                                                | PTGS1, PPARG, PTGS2, NOS3, ESR1, CNR1, CNR2, ENPP2, CES1, FABP4, PRKCA, ALOX5, PLA2G4A, PDCD4, S1PR2, STS, TLR2, TRPV1                                                                                             |
| MOL063 | C-Homoerythrinan, 1,6-didehydro-3,15,16-trimethoxy-, (3.beta.)- | ADCY1, KCNA5, PTGS1, KCNH2, ESR1, AR, PTGS2, ADRA2A, HTR1A, HRH1, ADRA2B, ADRB2, CHRNA2, DRD2, ESR2, GSK3B, CHRNA7, CHRNA5                                                                                         |
| MOL077 | Anhydroicaritin-3-O-alpha-L-rhamnoside                          | TF, VDR, PLK2, ABCG2, AKR1B1, CYP1B1, IL2, RPS6KA3, LGALS3, PDE5A, TYR, XDH                                                                                                                                        |

**Supplementary Table 2. Active compounds for each potential target.**

| Potential targets | MOL-ID (Active compounds)                                                                                       |
|-------------------|-----------------------------------------------------------------------------------------------------------------|
| ESR1              | MOL004, MOL008, MOL010, MOL012, MOL033, MOL039, MOL042, MOL044, MOL056, MOL063, MOL065, MOL067, MOL069, MOL074, |
| AR                | MOL004, MOL008, MOL010, MOL012, MOL033, MOL039, MOL042, MOL044, MOL056, MOL063, MOL065, MOL067, MOL069, MOL074  |
| ESR2              | MOL004, MOL010, MOL012, MOL033, MOL039, MOL042, MOL044, MOL056, MOL063, MOL067, MOL069, MOL074                  |
| PPARG             | MOL004, MOL008, MOL010, MOL012, MOL033, MOL039, MOL044, MOL056, MOL067, MOL069, MOL074                          |
| PTGS2             | MOL008, MOL012, MOL033, MOL039, MOL044, MOL056, MOL063, MOL065, MOL067, MOL069, MOL074                          |
| ABCG2             | MOL012, MOL033, MOL039, MOL044, MOL056, MOL067, MOL069, MOL074, MOL077, MOL106                                  |
| GSK3B             | MOL012, MOL033, MOL039, MOL042, MOL044, MOL056, MOL063, MOL067, MOL069, MOL074                                  |
| CYP1B1            | MOL033, MOL039, MOL044, MOL056, MOL065, MOL067, MOL069, MOL074, MOL077, MOL106                                  |
| PTGS1             | MOL004, MOL008, MOL012, MOL033, MOL039, MOL044, MOL056, MOL063, MOL074                                          |
| PIM1              | MOL012, MOL033, MOL039, MOL044, MOL056, MOL065, MOL067, MOL069, MOL074                                          |
| NOS2              | MOL012, MOL033, MOL039, MOL044, MOL056, MOL067, MOL069, MOL074                                                  |
| MAPK14            | MOL012, MOL033, MOL039, MOL044, MOL056, MOL067, MOL069, MOL074                                                  |
| CDK2              | MOL012, MOL033, MOL039, MOL044, MOL056, MOL067, MOL069, MOL074                                                  |
| XDH               | MOL039, MOL044, MOL056, MOL065, MOL067, MOL069, MOL077, MOL106                                                  |
| CREB1             | MOL033, MOL044, MOL056, MOL065, MOL067, MOL069, MOL074                                                          |
| DAPK1             | MOL033, MOL039, MOL044, MOL056, MOL065, MOL067, MOL069                                                          |
| IL2               | MOL033, MOL044, MOL056, MOL067, MOL069, MOL077, MOL106                                                          |
| RPS6KA3           | MOL033, MOL039, MOL044, MOL056, MOL067, MOL077, MOL0106                                                         |
| ABCB1             | MOL033, MOL039, MOL056, MOL065, MOL067, MOL069, MOL074                                                          |
| VEGFA             | MOL012, MOL033, MOL044, MOL065, MOL067, MOL069                                                                  |
| AKR1B1            | MOL033, MOL044, MOL067, MOL069, MOL077, MOL0106                                                                 |
| ABCC1             | MOL033, MOL039, MOL056, MOL065, MOL067, MOL069                                                                  |
| ALOX5             | MOL008, MOL033, MOL039, MOL044, MOL056,                                                                         |
| PGR               | MOL004, MOL010, MOL042, MOL044                                                                                  |
| CA2               | MOL004, MOL010, MOL042, MOL044                                                                                  |
| CYP19A1           | MOL004, MOL010, MOL042, MOL056                                                                                  |
| VDR               | MOL004, MOL010, MOL042, MOL077                                                                                  |
| NOS3              | MOL008, MOL044, MOL056, MOL074                                                                                  |
| ADRB2             | MOL012, MOL056, MOL063, MOL074                                                                                  |
| TTR               | MOL033, MOL065, MOL067, MOL069                                                                                  |
| KCNH2             | MOL039, MOL044, MOL056, MOL063                                                                                  |
| ADCY1             | MOL004, MOL010, MOL063                                                                                          |
| CA1               | MOL004, MOL010, MOL042                                                                                          |
| CYP24A1           | MOL004, MOL010, MOL042                                                                                          |
| ABCC4             | MOL004, MOL010, MOL042                                                                                          |
| RORC              | MOL004, MOL010, MOL042                                                                                          |
| SREBF2            | MOL004, MOL010, MOL042                                                                                          |
| GC                | MOL004, MOL010, MOL042                                                                                          |
| PIK3CG            | MOL012, MOL033, MOL044                                                                                          |
| CYP1A1            | MOL033, MOL067, MOL074                                                                                          |
| PDE5A             | MOL056, MOL077, MOL106                                                                                          |
| F7                | MOL039, MOL044, MOL056                                                                                          |
| DHCR7             | MOL004, MOL010                                                                                                  |
| NR3C1             | MOL010, MOL042                                                                                                  |
| CA3               | MOL033, MOL044                                                                                                  |
| EP300             | MOL0393, MOL067                                                                                                 |
| KCNMA1            | MOL039, MOL056                                                                                                  |
| ALDH2             | MOL039, MOL044                                                                                                  |
| RELA              | MOL039, MOL056                                                                                                  |
| APEX1             | MOL044, MOL0106                                                                                                 |
| ASIC3             | MOL065, MOL069                                                                                                  |
| LGALS3            | MOL077, MOL0106                                                                                                 |

|         |                 |
|---------|-----------------|
| TYR     | MOL077, MOL0106 |
| FGF1    | MOL004          |
| CNR1    | MOL008          |
| CNR2    | MOL008          |
| ENPP2   | MOL008          |
| CES1    | MOL008          |
| FABP4   | MOL008          |
| PRKCA   | MOL008          |
| PLA2G4A | MOL008          |
| PDCD4   | MOL008          |
| S1PR2   | MOL008          |
| STS     | MOL008          |
| TLR2    | MOL008          |
| TRPV1   | MOL008          |
| MMP9    | MOL012          |
| JUN     | MOL012          |
| LDHA    | MOL012          |
| MALT1   | MOL012          |
| CA9     | MOL033          |
| CYP1A2  | MOL044          |
| RXRβ    | MOL056          |
| HRH1    | MOL063          |
| NCOA1   | MOL056          |
| NQO1    | MOL056          |
| KCNA5   | MOL063          |
| ADRA2A  | MOL063          |
| HTR1A   | MOL063          |
| ADRA2B  | MOL063          |
| CHRNA2  | MOL063          |
| DRD2    | MOL063          |
| CHRNA7  | MOL063          |
| CHRNA5  | MOL063          |
| CYSLTR1 | MOL074          |
| CA12    | MOL0106         |
| PRKDC   | MOL074          |
| TF      | MOL077          |
| PLK2    | MOL077          |

---
