# Supplementary material for: Systems pharmacology dissection of Epimedium targeting tumor microenvironment to enhance cytotoxic T lymphocyte responses in lung cancer
Source: Aging (Albany NY). 2021 Jan 17;13(2):2912–40. doi: 10.18632/aging.202410 (PMC7880341; doi:10.18632/aging.202410)
Supplement: Supplementary Table 3 [file aging-13-202410-s003.xlsx]

## Sheet: Sheet1
Supplementary Table 3. The GO BP enrichment analysis for targets.
GOID	GOTerm	Ontology Source	Term PValue	Term PValue Corrected with Bonferroni step down	Group PValue	Group PValue Corrected with Bonferroni step down	GOLevels	GOGroups	% Associated Genes	Nr. Genes	Associated Genes Found
GO:0006690	icosanoid metabolic process	GO_BiologicalProcess-EBI-UniProt-GOA_27.02.2019_00h00	3.75271e-09	6.3796e-08	3.75271e-09	1.12581e-08	[4, 6]	Group0	6.57895	10	[ABCC1, ALOX5, CES1, CYP1A1, CYP1A2, CYP1B1, PLA2G4A, PTGS1, PTGS2, TLR2]
GO:0007187	G protein-coupled receptor signaling pathway, coupled to cyclic nucleotide second messenger	GO_BiologicalProcess-EBI-UniProt-GOA_27.02.2019_00h00	1.98091e-06	1.98091e-06	4.51035e-09	9.02071e-09	[4, 5, 6]	Group1	3.367	10	[ADCY1, ADRA2A, ADRA2B, ADRB2, CNR1, CNR2, DRD2, HRH1, HTR1A, PRKCA]
GO:0046883	regulation of hormone secretion	GO_BiologicalProcess-EBI-UniProt-GOA_27.02.2019_00h00	7.51517e-07	3.00607e-06	4.51035e-09	9.02071e-09	[3, 4, 5, 6, 7, 8]	Group1	3.28358	11	[ADRA2A, ADRA2B, ADRB2, CNR1, CREB1, CYP19A1, DRD2, HTR1A, KCNA5, NOS2, PRKCA]
GO:0050806	positive regulation of synaptic transmission	GO_BiologicalProcess-EBI-UniProt-GOA_27.02.2019_00h00	1.56472e-07	1.40825e-06	4.51035e-09	9.02071e-09	[3, 4, 5, 6, 7, 8, 9]	Group1	4.44444	10	[ADCY1, ADRB2, APEX1, CA2, CHRNA7, CNR1, CREB1, DRD2, PLK2, PTGS2]
GO:0099094	ligand-gated cation channel activity	GO_BiologicalProcess-EBI-UniProt-GOA_27.02.2019_00h00	2.534e-07	1.267e-06	8.95742e-07	8.95742e-07	[9, 10, 11]	Group2	4.21941	10	[ADRB2, APEX1, ASIC3, CHRNA2, CHRNA5, CHRNA7, DAPK1, KCNH2, PRKCA, TRPV1]
GO:0015276	ligand-gated ion channel activity	GO_BiologicalProcess-EBI-UniProt-GOA_27.02.2019_00h00	8.95742e-07	2.68723e-06	8.95742e-07	8.95742e-07	[8, 10]	Group2	3.67647	10	[ADRB2, APEX1, ASIC3, CHRNA2, CHRNA5, CHRNA7, DAPK1, KCNH2, PRKCA, TRPV1]
GO:0022834	ligand-gated channel activity	GO_BiologicalProcess-EBI-UniProt-GOA_27.02.2019_00h00	8.95742e-07	2.68723e-06	8.95742e-07	8.95742e-07	[9]	Group2	3.67647	10	[ADRB2, APEX1, ASIC3, CHRNA2, CHRNA5, CHRNA7, DAPK1, KCNH2, PRKCA, TRPV1]
GO:0002237	response to molecule of bacterial origin	GO_BiologicalProcess-EBI-UniProt-GOA_27.02.2019_00h00	1.43956e-11	2.87912e-10	3.89277e-23	1.94638e-22	[4, 6]	Group3	3.78151	18	[ADRB2, CNR1, CNR2, CYP1A1, CYP1A2, JUN, MALT1, MAPK14, NCOA1, NOS2, NOS3, PDCD4, PRKCA, PTGS2, RELA, RPS6KA3, STS, TLR2]
GO:0010632	regulation of epithelial cell migration	GO_BiologicalProcess-EBI-UniProt-GOA_27.02.2019_00h00	1.79236e-07	1.25465e-06	3.89277e-23	1.94638e-22	[3, 4, 5, 6, 7]	Group3	3.7931	11	[ENPP2, FGF1, JUN, MMP9, NCOA1, NOS3, PLK2, PPARG, PRKCA, PTGS2, VEGFA]
GO:0050727	regulation of inflammatory response	GO_BiologicalProcess-EBI-UniProt-GOA_27.02.2019_00h00	4.36848e-12	1.00475e-10	3.89277e-23	1.94638e-22	[4, 5, 6]	Group3	4.06321	18	[ADRB2, CNR1, CNR2, CYP19A1, ESR1, FABP4, GC, IL2, MAPK14, MMP9, NOS2, PDCD4, PIK3CG, PPARG, PTGS2, RELA, STS, TLR2]
GO:0097191	extrinsic apoptotic signaling pathway	GO_BiologicalProcess-EBI-UniProt-GOA_27.02.2019_00h00	1.98091e-06	1.98091e-06	3.89277e-23	1.94638e-22	[4, 5, 6]	Group3	3.367	10	[AKR1B1, AR, DAPK1, GSK3B, IL2, LGALS3, NCOA1, NOS3, RELA, STS]
GO:0032496	response to lipopolysaccharide	GO_BiologicalProcess-EBI-UniProt-GOA_27.02.2019_00h00	7.60245e-12	1.67254e-10	3.89277e-23	1.94638e-22	[4, 5, 7]	Group3	3.93013	18	[ADRB2, CNR1, CNR2, CYP1A1, CYP1A2, JUN, MALT1, MAPK14, NCOA1, NOS2, NOS3, PDCD4, PRKCA, PTGS2, RELA, RPS6KA3, STS, TLR2]
GO:0071219	cellular response to molecule of bacterial origin	GO_BiologicalProcess-EBI-UniProt-GOA_27.02.2019_00h00	1.67202e-07	1.33761e-06	3.89277e-23	1.94638e-22	[4, 5, 7]	Group3	3.81944	11	[ADRB2, MALT1, MAPK14, NCOA1, NOS2, NOS3, PDCD4, PRKCA, RELA, STS, TLR2]
GO:0010634	positive regulation of epithelial cell migration	GO_BiologicalProcess-EBI-UniProt-GOA_27.02.2019_00h00	3.19387e-08	3.83264e-07	3.89277e-23	1.94638e-22	[3, 4, 5, 6, 7, 8]	Group3	5.26316	10	[ENPP2, FGF1, JUN, MMP9, NCOA1, NOS3, PLK2, PRKCA, PTGS2, VEGFA]
GO:0030879	mammary gland development	GO_BiologicalProcess-EBI-UniProt-GOA_27.02.2019_00h00	2.26799e-10	4.30917e-09	3.89277e-23	1.94638e-22	[5, 6, 7]	Group3	6.09137	12	[AKR1B1, AR, CREB1, CYP19A1, ESR1, KCNA5, NCOA1, PGR, PTGS2, VDR, VEGFA, XDH]
GO:1901342	regulation of vasculature development	GO_BiologicalProcess-EBI-UniProt-GOA_27.02.2019_00h00	1.30968e-08	1.96452e-07	3.89277e-23	1.94638e-22	[4, 5, 6, 7, 8]	Group3	3.39806	14	[CHRNA7, CYP1B1, ENPP2, FGF1, KCNA5, NOS3, NR3C1, PDCD4, PLK2, PPARG, PRKCA, PTGS2, VEGFA, XDH]
GO:0071222	cellular response to lipopolysaccharide	GO_BiologicalProcess-EBI-UniProt-GOA_27.02.2019_00h00	1.08891e-07	1.08891e-06	3.89277e-23	1.94638e-22	[5, 6, 8]	Group3	3.98551	11	[ADRB2, MALT1, MAPK14, NCOA1, NOS2, NOS3, PDCD4, PRKCA, RELA, STS, TLR2]
GO:0002573	myeloid leukocyte differentiation	GO_BiologicalProcess-EBI-UniProt-GOA_27.02.2019_00h00	8.95742e-07	2.68723e-06	3.89277e-23	1.94638e-22	[5, 6, 7, 8, 9]	Group3	3.67647	10	[CA2, CREB1, JUN, MAPK14, MMP9, NCOA1, PPARG, PRKCA, TLR2, VEGFA]
GO:0051091	positive regulation of DNA-binding transcription factor activity	GO_BiologicalProcess-EBI-UniProt-GOA_27.02.2019_00h00	1.81458e-07	1.08875e-06	3.89277e-23	1.94638e-22	[2, 3, 4, 7, 8, 9, 10, 11, 12, 13]	Group3	3.35196	12	[ADCY1, AKR1B1, AR, EP300, ESR1, ESR2, MALT1, PPARG, RELA, STS, TLR2, VEGFA]
GO:0097153	cysteine-type endopeptidase activity involved in apoptotic process	GO_BiologicalProcess-EBI-UniProt-GOA_27.02.2019_00h00	1.98091e-06	1.98091e-06	3.89277e-23	1.94638e-22	[5, 9, 10]	Group3	3.367	10	[CDK2, DAPK1, MMP9, NCOA1, PPARG, PTGS2, RPS6KA3, STS, VEGFA, XDH]
GO:0043281	regulation of cysteine-type endopeptidase activity involved in apoptotic process	GO_BiologicalProcess-EBI-UniProt-GOA_27.02.2019_00h00	1.54988e-06	3.09977e-06	3.89277e-23	1.94638e-22	[6, 7, 8, 9, 10, 11]	Group3	3.46021	10	[CDK2, DAPK1, MMP9, NCOA1, PPARG, PTGS2, RPS6KA3, STS, VEGFA, XDH]
GO:0009755	hormone-mediated signaling pathway	GO_BiologicalProcess-EBI-UniProt-GOA_27.02.2019_00h00	1.70599e-08	2.38838e-07	9.44377e-19	3.77751e-18	[3, 4, 5, 6]	Group4	3.69318	13	[ADRB2, AKR1B1, AR, EP300, ESR1, ESR2, NCOA1, NR3C1, PGR, PPARG, RORC, RXRB, VDR]
GO:0048732	gland development	GO_BiologicalProcess-EBI-UniProt-GOA_27.02.2019_00h00	1.12818e-11	2.36917e-10	9.44377e-19	3.77751e-18	[4, 5, 6]	Group4	3.28947	20	[AKR1B1, AR, CES1, CREB1, CYP19A1, CYP1A1, DRD2, ESR1, GC, JUN, KCNA5, NCOA1, PGR, PRKDC, PTGS2, RELA, TYR, VDR, VEGFA, XDH]
GO:0097191	extrinsic apoptotic signaling pathway	GO_BiologicalProcess-EBI-UniProt-GOA_27.02.2019_00h00	1.98091e-06	1.98091e-06	9.44377e-19	3.77751e-18	[4, 5, 6]	Group4	3.367	10	[AKR1B1, AR, DAPK1, GSK3B, IL2, LGALS3, NCOA1, NOS3, RELA, STS]
GO:0071219	cellular response to molecule of bacterial origin	GO_BiologicalProcess-EBI-UniProt-GOA_27.02.2019_00h00	1.67202e-07	1.33761e-06	9.44377e-19	3.77751e-18	[4, 5, 7]	Group4	3.81944	11	[ADRB2, MALT1, MAPK14, NCOA1, NOS2, NOS3, PDCD4, PRKCA, RELA, STS, TLR2]
GO:0043401	steroid hormone mediated signaling pathway	GO_BiologicalProcess-EBI-UniProt-GOA_27.02.2019_00h00	1.13979e-09	2.05163e-08	9.44377e-19	3.77751e-18	[4, 5, 6, 7]	Group4	4.62633	13	[ADRB2, AKR1B1, AR, EP300, ESR1, ESR2, NCOA1, NR3C1, PGR, PPARG, RORC, RXRB, VDR]
GO:0071383	cellular response to steroid hormone stimulus	GO_BiologicalProcess-EBI-UniProt-GOA_27.02.2019_00h00	3.5966e-08	3.95626e-07	9.44377e-19	3.77751e-18	[5, 6]	Group4	3.46667	13	[ADRB2, AKR1B1, AR, EP300, ESR1, ESR2, NCOA1, NR3C1, PGR, PPARG, RORC, RXRB, VDR]
GO:0030879	mammary gland development	GO_BiologicalProcess-EBI-UniProt-GOA_27.02.2019_00h00	2.26799e-10	4.30917e-09	9.44377e-19	3.77751e-18	[5, 6, 7]	Group4	6.09137	12	[AKR1B1, AR, CREB1, CYP19A1, ESR1, KCNA5, NCOA1, PGR, PTGS2, VDR, VEGFA, XDH]
GO:0071222	cellular response to lipopolysaccharide	GO_BiologicalProcess-EBI-UniProt-GOA_27.02.2019_00h00	1.08891e-07	1.08891e-06	9.44377e-19	3.77751e-18	[5, 6, 8]	Group4	3.98551	11	[ADRB2, MALT1, MAPK14, NCOA1, NOS2, NOS3, PDCD4, PRKCA, RELA, STS, TLR2]
GO:0003707	steroid hormone receptor activity	GO_BiologicalProcess-EBI-UniProt-GOA_27.02.2019_00h00	2.39534e-12	5.74881e-11	9.44377e-19	3.77751e-18	[5, 6, 7, 8]	Group4	10.8911	11	[ADRB2, AKR1B1, AR, ESR1, ESR2, NR3C1, PGR, PPARG, RORC, RXRB, VDR]
GO:0051091	positive regulation of DNA-binding transcription factor activity	GO_BiologicalProcess-EBI-UniProt-GOA_27.02.2019_00h00	1.81458e-07	1.08875e-06	9.44377e-19	3.77751e-18	[2, 3, 4, 7, 8, 9, 10, 11, 12, 13]	Group4	3.35196	12	[ADCY1, AKR1B1, AR, EP300, ESR1, ESR2, MALT1, PPARG, RELA, STS, TLR2, VEGFA]
GO:0006352	DNA-templated transcription, initiation	GO_BiologicalProcess-EBI-UniProt-GOA_27.02.2019_00h00	1.88614e-08	2.45199e-07	9.44377e-19	3.77751e-18	[6, 7, 8, 9, 10]	Group4	3.66197	13	[ADRB2, AKR1B1, AR, CREB1, ESR1, ESR2, JUN, NR3C1, PGR, PPARG, RORC, RXRB, VDR]
GO:0097153	cysteine-type endopeptidase activity involved in apoptotic process	GO_BiologicalProcess-EBI-UniProt-GOA_27.02.2019_00h00	1.98091e-06	1.98091e-06	9.44377e-19	3.77751e-18	[5, 9, 10]	Group4	3.367	10	[CDK2, DAPK1, MMP9, NCOA1, PPARG, PTGS2, RPS6KA3, STS, VEGFA, XDH]
GO:0043281	regulation of cysteine-type endopeptidase activity involved in apoptotic process	GO_BiologicalProcess-EBI-UniProt-GOA_27.02.2019_00h00	1.54988e-06	3.09977e-06	9.44377e-19	3.77751e-18	[6, 7, 8, 9, 10, 11]	Group4	3.46021	10	[CDK2, DAPK1, MMP9, NCOA1, PPARG, PTGS2, RPS6KA3, STS, VEGFA, XDH]
GO:0004879	nuclear receptor activity	GO_BiologicalProcess-EBI-UniProt-GOA_27.02.2019_00h00	3.91318e-13	9.78295e-12	9.44377e-19	3.77751e-18	[4, 5, 6, 8, 9, 10, 11, 12, 13]	Group4	12.7907	11	[ADRB2, AKR1B1, AR, ESR1, ESR2, NR3C1, PGR, PPARG, RORC, RXRB, VDR]
GO:0006367	transcription initiation from RNA polymerase II promoter	GO_BiologicalProcess-EBI-UniProt-GOA_27.02.2019_00h00	1.13512e-08	1.81619e-07	9.44377e-19	3.77751e-18	[7, 8, 9, 10, 11]	Group4	4.31655	12	[ADRB2, AKR1B1, AR, CREB1, ESR1, ESR2, NR3C1, PGR, PPARG, RORC, RXRB, VDR]
GO:0098531	ligand-activated transcription factor activity	GO_BiologicalProcess-EBI-UniProt-GOA_27.02.2019_00h00	3.91318e-13	9.78295e-12	9.44377e-19	3.77751e-18	[7, 8, 9, 10, 11, 12]	Group4	12.7907	11	[ADRB2, AKR1B1, AR, ESR1, ESR2, NR3C1, PGR, PPARG, RORC, RXRB, VDR]
