# Supplementary material for: Systems pharmacology dissection of Epimedium targeting tumor microenvironment to enhance cytotoxic T lymphocyte responses in lung cancer
Source: Aging (Albany NY). 2021 Jan 17;13(2):2912–40. doi: 10.18632/aging.202410 (PMC7880341; doi:10.18632/aging.202410)
Supplement: Supplementary Table 4 [file aging-13-202410-s004.xlsx]

## Sheet: Sheet1
Supplementary Table 4. Gene expression in control and icaritin-treated LLC tumour.
gene_id	gene_name	transcript_id	GO	KEGG	KO_ENTRY	EC	Description	FPKM.Control	FPKM.icaritin	log2(FC)	pooled.std.dev	z.stats	p.value	q.value	regulation	significant	DEGs
ENSMUSG00000000037	Scml2	ENSMUST00000101113;ENSMUST00000019101;ENSMUST00000112345;ENSMUST00000077375;ENSMUST00000124775	GO:0005634(nucleus);GO:0001741(XY body);GO:0000790(nuclear chromatin);GO:0036353(histone H2A-K119 monoubiquitination);GO:0034613(cellular protein localization);GO:0006915(apoptotic process);GO:0006355(regulation of transcription, DNA-templated);GO:0005515(protein binding);GO:0005515(protein binding)				sex comb on midleg-like 2 (Drosophila) [Source:MGI Symbol;Acc:MGI:1340042]	0.03	0.01	-0.028289	0.757724	-0.0263948	0.978942	1	DOWN	No	No
ENSMUSG00000000093	Tbx2	ENSMUST00000000095	GO:0000978(RNA polymerase II core promoter proximal region sequence-specific DNA binding);GO:0001078(transcriptional repressor activity, RNA polymerase II core promoter proximal region sequence-specific binding);GO:0003677(DNA binding);GO:0003700(transcription factor activity, sequence-specific DNA binding);GO:0005515(protein binding);GO:0043565(sequence-specific DNA binding);GO:0000122(negative …				T-box 2 [Source:MGI Symbol;Acc:MGI:98494]	0.49	0.43	-0.0592972	0.757724	-0.0791845	0.936886	1	DOWN	No	No
ENSMUSG00000000120	Ngfr	ENSMUST00000000122	GO:0005516(calmodulin binding);GO:0015026(coreceptor activity);GO:0031625(ubiquitin protein ligase binding);GO:0006919(activation of cysteine-type endopeptidase activity involved in apoptotic process);GO:0007165(signal transduction);GO:0007266(Rho protein signal transduction);GO:1900182(positive regulation of protein localization to nucleus);GO:1902895(positive regulation of pri-miRNA transcripti…	04014(Ras signaling pathway);04015(Rap1 signaling pathway);04060(Cytokine-cytokine receptor interaction);04151(PI3K-Akt signaling pathway);04722(Neurotrophin signaling pathway);05202(Transcriptional misregulation in cancers)			nerve growth factor receptor (TNFR superfamily, member 16) [Source:MGI Symbol;Acc:MGI:97323]	0.15	0.07	-0.104023	0.757724	-0.105579	0.915916	1	DOWN	No	No
ENSMUSG00000000142	Axin2	ENSMUST00000052915;ENSMUST00000140821;ENSMUST00000144511;ENSMUST00000144130;ENSMUST00000139682	GO:0005096(GTPase activator activity);GO:0005515(protein binding);GO:0019899(enzyme binding);GO:0031625(ubiquitin protein ligase binding);GO:0070411(I-SMAD binding);GO:0001756(somitogenesis);GO:0001934(positive regulation of protein phosphorylation);GO:0001957(intramembranous ossification);GO:0003139(secondary heart field specification);GO:0003413(chondrocyte differentiation involved in endochond…	04310(Wnt signaling pathway);04390(Hippo signaling pathway);04550(Signaling pathways regulating pluripotency of stem cells);05200(Pathways in cancer);05210(Colorectal cancer);05213(Endometrial cancer);05217(Basal cell carcinoma);05217(Basal cell carcinoma)			axin 2 [Source:MGI Symbol;Acc:MGI:1270862]	0.52	0.31	-0.214505	0.757724	-0.277146	0.781668	1	DOWN	No	No
ENSMUSG00000000154	Slc22a18	ENSMUST00000052348;ENSMUST00000141988;ENSMUST00000105917	GO:0016021(integral component of membrane);GO:0016020(membrane);GO:0055085(transmembrane transport);GO:0006855(drug transmembrane transport);GO:0005215(transporter activity);GO:0016324(apical plasma membrane);GO:0005737(cytoplasm);GO:0005635(nuclear envelope);GO:0015893(drug transport);GO:0031625(ubiquitin protein ligase binding);GO:0015238(drug transmembrane transporter activity);GO:0015238(drug…				solute carrier family 22 (organic cation transporter), member 18 [Source:MGI Symbol;Acc:MGI:1336884]	0.05	0.08	0.040642	0.757724	0.0395922	0.968418	1	UP	No	No
ENSMUSG00000000157	Itgb2l	ENSMUST00000113773;ENSMUST00000131777	GO:0006954(inflammatory response);GO:0007229(integrin-mediated signaling pathway);GO:0005886(plasma membrane);GO:0016020(membrane);GO:0016021(integral component of membrane);GO:0030141(secretory granule);GO:0007155(cell adhesion);GO:0007155(cell adhesion)	04015(Rap1 signaling pathway);04145(Phagosome);04390(Hippo signaling pathway);04514(Cell adhesion molecules (CAMs));04650(Natural killer cell mediated cytotoxicity);04670(Leukocyte transendothelial migration);04810(Regulation of actin cytoskeleton);05133(Pertussis);05134(Legionellosis);05140(Leishmaniasis);05144(Malaria);05146(Amoebiasis);05150(Staphylococcus aureus infection);05152(Tuberculosis)…			integrin beta 2-like [Source:MGI Symbol;Acc:MGI:1277979]	0	0	0	0.757724	0				No	No
ENSMUSG00000000159	Igsf5	ENSMUST00000113794;ENSMUST00000000163;ENSMUST00000113795	GO:0016021(integral component of membrane);GO:0016020(membrane);GO:0005516(calmodulin binding);GO:0005516(calmodulin binding)	04530(Tight junction);04530(Tight junction)			immunoglobulin superfamily, member 5 [Source:MGI Symbol;Acc:MGI:1919308]	0.06	0.04	-0.0274807	0.757724	-0.0263948	0.978942	1	DOWN	No	No
ENSMUSG00000000182	Fgf23	ENSMUST00000000186	GO:0005104(fibroblast growth factor receptor binding);GO:0008083(growth factor activity);GO:0006796(phosphate-containing compound metabolic process);GO:0008543(fibroblast growth factor receptor signaling pathway);GO:0010966(regulation of phosphate transport);GO:0010980(positive regulation of vitamin D 24-hydroxylase activity);GO:0030502(negative regulation of bone mineralization);GO:0032026(respo…	04010(MAPK signaling pathway);04014(Ras signaling pathway);04015(Rap1 signaling pathway);04151(PI3K-Akt signaling pathway);04810(Regulation of actin cytoskeleton);05200(Pathways in cancer);05218(Melanoma)			fibroblast growth factor 23 [Source:MGI Symbol;Acc:MGI:1891427]	0	0	0	0.757724	0				No	No
ENSMUSG00000000202	Btbd17	ENSMUST00000156053;ENSMUST00000000206	GO:0003674(molecular_function);GO:0008150(biological_process);GO:0005575(cellular_component);GO:0005576(extracellular region);GO:0005576(extracellular region)				BTB (POZ) domain containing 17 [Source:MGI Symbol;Acc:MGI:1919264]	0	0	0	0.757724	0				No	No
ENSMUSG00000000247	Lhx2	ENSMUST00000143783;ENSMUST00000000253;ENSMUST00000175896	GO:0005634(nucleus);GO:0045944(positive regulation of transcription from RNA polymerase II promoter);GO:0006366(transcription from RNA polymerase II promoter);GO:0006355(regulation of transcription, DNA-templated);GO:0046872(metal ion binding);GO:0043565(sequence-specific DNA binding);GO:0008270(zinc ion binding);GO:0003677(DNA binding);GO:0001077(transcriptional activator activity, RNA polymeras…				LIM homeobox protein 2 [Source:MGI Symbol;Acc:MGI:96785]	0.05	0.04	-0.0138058	0.757724	-0.0131974	0.98947	1	DOWN	No	No
ENSMUSG00000000305	Cdh4	ENSMUST00000000314	GO:0005509(calcium ion binding);GO:0046872(metal ion binding);GO:0007155(cell adhesion);GO:0007156(homophilic cell adhesion via plasma membrane adhesion molecules);GO:0007157(heterophilic cell-cell adhesion via plasma membrane cell adhesion molecules);GO:0007411(axon guidance);GO:0045773(positive regulation of axon extension);GO:0005886(plasma membrane);GO:0005887(integral component of plasma mem…	04514(Cell adhesion molecules (CAMs))			cadherin 4 [Source:MGI Symbol;Acc:MGI:99218]	0	0.01	0.0143553	0.757724	0.0131974	0.98947	1	UP	No	No
ENSMUSG00000000320	Alox12	ENSMUST00000000329;ENSMUST00000108574	GO:0070062(extracellular exosome);GO:0042383(sarcolemma);GO:0016020(membrane);GO:0005829(cytosol);GO:0005737(cytoplasm);GO:2001306(lipoxin B4 biosynthetic process);GO:2001303(lipoxin A4 biosynthetic process);GO:1901751(leukotriene A4 metabolic process);GO:0071396(cellular response to lipid);GO:0055114(oxidation-reduction process);GO:0051901(positive regulation of mitochondrial depolarization);GO:…	00590(Arachidonic acid metabolism);04726(Serotonergic synapse);04750(Inflammatory mediator regulation of TRP channels);04750(Inflammatory mediator regulation of TRP channels)			arachidonate 12-lipoxygenase [Source:MGI Symbol;Acc:MGI:87998]	0.06	0.02	-0.0554951	0.757724	-0.0527896	0.9579	1	DOWN	No	No
ENSMUSG00000000365	Rnf17	ENSMUST00000095793	GO:0008270(zinc ion binding);GO:0042803(protein homodimerization activity);GO:0046872(metal ion binding);GO:0007275(multicellular organism development);GO:0007283(spermatogenesis);GO:0007286(spermatid development);GO:0030154(cell differentiation);GO:0005634(nucleus);GO:0005737(cytoplasm)				ring finger protein 17 [Source:MGI Symbol;Acc:MGI:1353419]	0.01	0.01	0	0.757724	0	1	1		No	No
ENSMUSG00000000416	Cttnbp2	ENSMUST00000152499;ENSMUST00000146775;ENSMUST00000148602	GO:0043197(dendritic spine);GO:0042995(cell projection);GO:0005938(cell cortex);GO:0005737(cytoplasm);GO:0008021(synaptic vesicle);GO:0007420(brain development);GO:0017124(SH3 domain binding);GO:0017124(SH3 domain binding)				cortactin binding protein 2 [Source:MGI Symbol;Acc:MGI:1353467]	0.11	0.02	-0.121991	0.757724	-0.118777	0.905452	1	DOWN	No	No
ENSMUSG00000000544	Gpa33	ENSMUST00000060833	GO:0070062(extracellular exosome);GO:0016021(integral component of membrane);GO:0016020(membrane)				glycoprotein A33 (transmembrane) [Source:MGI Symbol;Acc:MGI:1891703]	0.06	0	-0.0840643	0.757724	-0.0791845	0.936886	1	DOWN	No	No
ENSMUSG00000000627	Sema4f	ENSMUST00000000641;ENSMUST00000125579	GO:0005515(protein binding);GO:0007275(multicellular organism development);GO:0007399(nervous system development);GO:0007411(axon guidance);GO:0030154(cell differentiation);GO:0030517(negative regulation of axon extension);GO:0031290(retinal ganglion cell axon guidance);GO:0005783(endoplasmic reticulum);GO:0005886(plasma membrane);GO:0016020(membrane);GO:0016021(integral component of membrane);GO…	04360(Axon guidance);04360(Axon guidance)			sema domain, immunoglobulin domain (Ig), TM domain, and short cytoplasmic domain [Source:MGI Symbol;Acc:MGI:1340055]	0.09	0.08	-0.0132968	0.757724	-0.0131974	0.98947	1	DOWN	No	No
ENSMUSG00000000632	Sez6	ENSMUST00000093995;ENSMUST00000142542	GO:0003674(molecular_function);GO:0008344(adult locomotory behavior);GO:0021680(cerebellar Purkinje cell layer development);GO:0050773(regulation of dendrite development);GO:0060074(synapse maturation);GO:0060079(excitatory postsynaptic potential);GO:0090036(regulation of protein kinase C signaling);GO:1900006(positive regulation of dendrite development);GO:2000171(negative regulation of dendrite…				seizure related gene 6 [Source:MGI Symbol;Acc:MGI:104745]	0.06	0	-0.0840643	0.757724	-0.0791845	0.936886	1	DOWN	No	No
ENSMUSG00000000673	Haao	ENSMUST00000000687	GO:0000334(3-hydroxyanthranilate 3,4-dioxygenase activity);GO:0005506(iron ion binding);GO:0008198(ferrous iron binding);GO:0016491(oxidoreductase activity);GO:0046872(metal ion binding);GO:0051213(dioxygenase activity);GO:0009435(NAD biosynthetic process);GO:0010043(response to zinc ion);GO:0019363(pyridine nucleotide biosynthetic process);GO:0046686(response to cadmium ion);GO:0055114(oxidation…	00380(Tryptophan metabolism)	K00452	EC:1.13.11.6	3-hydroxyanthranilate 3,4-dioxygenase [Source:MGI Symbol;Acc:MGI:1349444]	0.41	0.12	-0.332196	0.757724	-0.382725	0.701924	1	DOWN	No	No
ENSMUSG00000000794	Kcnn3	ENSMUST00000000811;ENSMUST00000124584	GO:0005516(calmodulin binding);GO:0015269(calcium-activated potassium channel activity);GO:0016286(small conductance calcium-activated potassium channel activity);GO:0006810(transport);GO:0006811(ion transport);GO:0006813(potassium ion transport);GO:0071805(potassium ion transmembrane transport);GO:1903955(positive regulation of protein targeting to mitochondrion);GO:0005737(cytoplasm);GO:0005886…	04911(Insulin secretion);04911(Insulin secretion)			potassium intermediate/small conductance calcium-activated channel, subfamily N, member 3 [Source:MGI Symbol;Acc:MGI:2153183]	0.2	0.05	-0.192645	0.757724	-0.197961	0.843075	1	DOWN	No	No
ENSMUSG00000000861	Bcl11a	ENSMUST00000000881;ENSMUST00000109516;ENSMUST00000124148;ENSMUST00000109514	GO:0000978(RNA polymerase II core promoter proximal region sequence-specific DNA binding);GO:0001078(transcriptional repressor activity, RNA polymerase II core promoter proximal region sequence-specific binding);GO:0003676(nucleic acid binding);GO:0003714(transcription corepressor activity);GO:0005515(protein binding);GO:0043565(sequence-specific DNA binding);GO:0044212(transcription regulatory r…				B cell CLL/lymphoma 11A (zinc finger protein) [Source:MGI Symbol;Acc:MGI:106190]	0.04	0.02	-0.0280144	0.757724	-0.0263948	0.978942	1	DOWN	No	No
ENSMUSG00000001023	S100a5	ENSMUST00000107329;ENSMUST00000001049	GO:0005507(copper ion binding);GO:0005509(calcium ion binding);GO:0008270(zinc ion binding);GO:0042803(protein homodimerization activity);GO:0046872(metal ion binding);GO:0046914(transition metal ion binding);GO:0008150(biological_process);GO:0005634(nucleus);GO:0043025(neuronal cell body);GO:0043025(neuronal cell body)				S100 calcium binding protein A5 [Source:MGI Symbol;Acc:MGI:1338915]	0.73	0.73	0	0.757724	0	1	1		No	No
ENSMUSG00000001076	C1ql4	ENSMUST00000064462	GO:0005515(protein binding);GO:0042802(identical protein binding);GO:0045599(negative regulation of fat cell differentiation);GO:0048147(negative regulation of fibroblast proliferation);GO:0070373(negative regulation of ERK1 and ERK2 cascade);GO:0005576(extracellular region);GO:0005581(collagen trimer);GO:0005615(extracellular space)				complement component 1, q subcomponent-like 4 [Source:MGI Symbol;Acc:MGI:3579909]	0	0	0	0.757724	0				No	No
ENSMUSG00000001095	Slc13a2	ENSMUST00000001122	GO:0005215(transporter activity);GO:0015293(symporter activity);GO:0006810(transport);GO:0006811(ion transport);GO:0006814(sodium ion transport);GO:0055085(transmembrane transport);GO:0098656(anion transmembrane transport);GO:0005887(integral component of plasma membrane);GO:0016020(membrane);GO:0016021(integral component of membrane);GO:0070062(extracellular exosome)				solute carrier family 13 (sodium-dependent dicarboxylate transporter), member 2 [Source:MGI Symbol;Acc:MGI:1276558]	0	0	0	0.757724	0				No	No
ENSMUSG00000001155	Ftcd	ENSMUST00000137347	GO:0003824(catalytic activity);GO:0005542(folic acid binding);GO:0008017(microtubule binding);GO:0016740(transferase activity);GO:0016829(lyase activity);GO:0030407(formimidoyltransferase activity);GO:0030409(glutamate formimidoyltransferase activity);GO:0030412(formimidoyltetrahydrofolate cyclodeaminase activity);GO:0006547(histidine metabolic process);GO:0006548(histidine catabolic process);GO:…	00340(Histidine metabolism);00670(One carbon pool by folate)			formiminotransferase cyclodeaminase [Source:MGI Symbol;Acc:MGI:1339962]	0.03	0.01	-0.028289	0.757724	-0.0263948	0.978942	1	DOWN	No	No
ENSMUSG00000001225	Slc26a3	ENSMUST00000001254	GO:0016021(integral component of membrane);GO:0016020(membrane);GO:0005887(integral component of plasma membrane);GO:1902358(sulfate transmembrane transport);GO:0098656(anion transmembrane transport);GO:0055085(transmembrane transport);GO:0015701(bicarbonate transport);GO:0008272(sulfate transport);GO:0006821(chloride transport);GO:0015301(anion:anion antiporter activity);GO:0015116(sulfate trans…	04972(Pancreatic secretion);04978(Mineral absorption)			solute carrier family 26, member 3 [Source:MGI Symbol;Acc:MGI:107181]	0	0	0	0.757724	0				No	No
ENSMUSG00000001444	Tbx21	ENSMUST00000001484	GO:0003677(DNA binding);GO:0003700(transcription factor activity, sequence-specific DNA binding);GO:0044212(transcription regulatory region DNA binding);GO:0006351(transcription, DNA-templated);GO:0006355(regulation of transcription, DNA-templated);GO:0009615(response to virus);GO:0045893(positive regulation of transcription, DNA-templated);GO:0072676(lymphocyte migration);GO:0005634(nucleus);GO:…	05321(Inflammatiory bowel disease (IBD))			T-box 21 [Source:MGI Symbol;Acc:MGI:1888984]	0.38	0.84	0.415037	0.757724	0.607081	0.543797	1	UP	No	No
ENSMUSG00000001510	Dlx3	ENSMUST00000092768	GO:0001077(transcriptional activator activity, RNA polymerase II core promoter proximal region sequence-specific binding);GO:0003677(DNA binding);GO:0003682(chromatin binding);GO:0043565(sequence-specific DNA binding);GO:0001568(blood vessel development);GO:0001890(placenta development);GO:0006355(regulation of transcription, DNA-templated);GO:0006366(transcription from RNA polymerase II promoter…				distal-less homeobox 3 [Source:MGI Symbol;Acc:MGI:94903]	0.04	0.09	0.0677446	0.757724	0.065987	0.947388	1	UP	No	No
ENSMUSG00000001763	Tspan33	ENSMUST00000046750;ENSMUST00000137925	GO:0019899(enzyme binding);GO:0007166(cell surface receptor signaling pathway);GO:0051604(protein maturation);GO:0090002(establishment of protein localization to plasma membrane);GO:0005886(plasma membrane);GO:0005887(integral component of plasma membrane);GO:0009986(cell surface);GO:0016020(membrane);GO:0016021(integral component of membrane);GO:0097197(tetraspanin-enriched microdomain);GO:00971…				tetraspanin 33 [Source:MGI Symbol;Acc:MGI:1919012]	0.09	0.22	0.162553	0.757724	0.171566	0.863778	1	UP	No	No
ENSMUSG00000001819	Hoxd13	ENSMUST00000001872	GO:0000978(RNA polymerase II core promoter proximal region sequence-specific DNA binding);GO:0001077(transcriptional activator activity, RNA polymerase II core promoter proximal region sequence-specific binding);GO:0001228(transcriptional activator activity, RNA polymerase II transcription regulatory region sequence-specific binding);GO:0003677(DNA binding);GO:0003682(chromatin binding);GO:000370…				homeobox D13 [Source:MGI Symbol;Acc:MGI:96205]	0	0.02	0.0285692	0.757724	0.0263948	0.978942	1	UP	No	No
ENSMUSG00000001823	Hoxd12	ENSMUST00000001878	GO:0003677(DNA binding);GO:0005515(protein binding);GO:0043565(sequence-specific DNA binding);GO:0001501(skeletal system development);GO:0006351(transcription, DNA-templated);GO:0006355(regulation of transcription, DNA-templated);GO:0007275(multicellular organism development);GO:0007389(pattern specification process);GO:0042733(embryonic digit morphogenesis);GO:0005634(nucleus);GO:0005667(transcr…				homeobox D12 [Source:MGI Symbol;Acc:MGI:96204]	0.02	0	-0.0285692	0.757724	-0.0263948	0.978942	1	DOWN	No	No
ENSMUSG00000001986	Gria3	ENSMUST00000076349;ENSMUST00000148212;ENSMUST00000126843	GO:0045211(postsynaptic membrane);GO:0045202(synapse);GO:0030054(cell junction);GO:0016021(integral component of membrane);GO:0016020(membrane);GO:0005886(plasma membrane);GO:0060079(excitatory postsynaptic potential);GO:0035235(ionotropic glutamate receptor signaling pathway);GO:0034220(ion transmembrane transport);GO:0006811(ion transport);GO:0006810(transport);GO:0005234(extracellular-glutamat…	04024(cAMP signaling pathway);04080(Neuroactive ligand-receptor interaction);04713(Circadian entrainment);04723(Retrograde endocannabinoid signaling);04724(Glutamatergic synapse);04728(Dopaminergic synapse);04730(Long-term depression);05031(Amphetamine addiction);05033(Nicotine addiction);05202(Transcriptional misregulation in cancers);05202(Transcriptional misregulation in cancers)			glutamate receptor, ionotropic, AMPA3 (alpha 3) [Source:MGI Symbol;Acc:MGI:95810]	0.03	0.02	-0.0140752	0.757724	-0.0131974	0.98947	1	DOWN	No	No
ENSMUSG00000002057	Foxn1	ENSMUST00000108294	GO:0003677(DNA binding);GO:0003700(transcription factor activity, sequence-specific DNA binding);GO:0043565(sequence-specific DNA binding);GO:0006351(transcription, DNA-templated);GO:0006355(regulation of transcription, DNA-templated);GO:0030216(keratinocyte differentiation);GO:0030858(positive regulation of epithelial cell differentiation);GO:0048538(thymus development);GO:0005634(nucleus);GO:00…				forkhead box N1 [Source:MGI Symbol;Acc:MGI:102949]	0	0.01	0.0143553	0.757724	0.0131974	0.98947	1	UP	No	No
ENSMUSG00000002076	Hsf2bp	ENSMUST00000002145;ENSMUST00000133308	GO:0005515(protein binding);GO:0005737(cytoplasm);GO:0005829(cytosol);GO:0005829(cytosol)				heat shock transcription factor 2 binding protein [Source:MGI Symbol;Acc:MGI:1921627]	0.13	0.04	-0.119739	0.757724	-0.118777	0.905452	1	DOWN	No	No
ENSMUSG00000002100	Mybpc3	ENSMUST00000169776	GO:0008307(structural constituent of muscle);GO:0017022(myosin binding);GO:0032036(myosin heavy chain binding);GO:0042802(identical protein binding);GO:0003007(heart morphogenesis);GO:0006942(regulation of striated muscle contraction);GO:0055010(ventricular cardiac muscle tissue morphogenesis);GO:0060048(cardiac muscle contraction);GO:0005863(striated muscle myosin thick filament);GO:0030017(sarc…	05410(Hypertrophic cardiomyopathy (HCM));05414(Dilated cardiomyopathy (DCM))			myosin binding protein C, cardiac [Source:MGI Symbol;Acc:MGI:102844]	0.07	0.04	-0.0410273	0.757724	-0.0395922	0.968418	1	DOWN	No	No
ENSMUSG00000002190	Clgn	ENSMUST00000002259	GO:0005509(calcium ion binding);GO:0005515(protein binding);GO:0044183(protein binding involved in protein folding);GO:0051082(unfolded protein binding);GO:0006457(protein folding);GO:0006461(protein complex assembly);GO:0007275(multicellular organism development);GO:0007283(spermatogenesis);GO:0007338(single fertilization);GO:0007339(binding of sperm to zona pellucida);GO:0030154(cell differenti…				calmegin [Source:MGI Symbol;Acc:MGI:107472]	0.13	0	-0.176323	0.757724	-0.171566	0.863778	1	DOWN	No	No
ENSMUSG00000002266	Zim1	ENSMUST00000002336	GO:0003676(nucleic acid binding);GO:0003700(transcription factor activity, sequence-specific DNA binding);GO:0046872(metal ion binding);GO:0006355(regulation of transcription, DNA-templated);GO:0005622(intracellular)				zinc finger, imprinted 1 [Source:MGI Symbol;Acc:MGI:1341879]	0.04	0.02	-0.0280144	0.757724	-0.0263948	0.978942	1	DOWN	No	No
ENSMUSG00000002341	Ncan	ENSMUST00000002412	GO:0007155(cell adhesion);GO:0005540(hyaluronic acid binding);GO:0005509(calcium ion binding)				neurocan [Source:MGI Symbol;Acc:MGI:104694]	0.01	0	-0.0143553	0.757724	-0.0131974	0.98947	1	DOWN	No	No
ENSMUSG00000002346	Slc25a42	ENSMUST00000063788;ENSMUST00000110127;ENSMUST00000139333;ENSMUST00000150706;ENSMUST00000134596	GO:0005347(ATP transmembrane transporter activity);GO:0015217(ADP transmembrane transporter activity);GO:0015228(coenzyme A transmembrane transporter activity);GO:0043262(adenosine-diphosphatase activity);GO:0080122(AMP transmembrane transporter activity);GO:0006810(transport);GO:0006839(mitochondrial transport);GO:0015866(ADP transport);GO:0015867(ATP transport);GO:0035349(coenzyme A transmembra…				solute carrier family 25, member 42 [Source:MGI Symbol;Acc:MGI:1920345]	0.89	0.84	-0.0386805	0.757724	-0.065987	0.947388	1	DOWN	No	No
ENSMUSG00000002475	Abhd3	ENSMUST00000117828;ENSMUST00000002549	GO:0016021(integral component of membrane);GO:0016020(membrane);GO:0004623(phospholipase A2 activity);GO:0008970(phosphatidylcholine 1-acylhydrolase activity);GO:0016787(hydrolase activity);GO:0052689(carboxylic ester hydrolase activity);GO:0052739(phosphatidylserine 1-acylhydrolase activity);GO:0052740(1-acyl-2-lysophosphatidylserine acylhydrolase activity);GO:0006629(lipid metabolic process);GO…		K13806	EC:3.1.1.-	abhydrolase domain containing 3 [Source:MGI Symbol;Acc:MGI:2147183]	0.31	0.18	-0.15078	0.757724	-0.171566	0.863778	1	DOWN	No	No
ENSMUSG00000002578	Ikzf4	ENSMUST00000133342	GO:0003676(nucleic acid binding);GO:0003677(DNA binding);GO:0003700(transcription factor activity, sequence-specific DNA binding);GO:0005515(protein binding);GO:0042803(protein homodimerization activity);GO:0043425(bHLH transcription factor binding);GO:0043565(sequence-specific DNA binding);GO:0044212(transcription regulatory region DNA binding);GO:0046872(metal ion binding);GO:0046982(protein he…				IKAROS family zinc finger 4 [Source:MGI Symbol;Acc:MGI:1343139]	0.06	0.07	0.0135465	0.757724	0.0131974	0.98947	1	UP	No	No
ENSMUSG00000002664	Pspn	ENSMUST00000002740	GO:0005576(extracellular region);GO:0008083(growth factor activity)				persephin [Source:MGI Symbol;Acc:MGI:1201684]	0.22	0.48	0.278716	0.757724	0.343133	0.731499	1	UP	No	No
ENSMUSG00000002791	Pdxk-ps	ENSMUST00000159650;ENSMUST00000183934					pyridoxal (pyridoxine, vitamin B6) kinase, pseudogene [Source:MGI Symbol;Acc:MGI:1933201]	0.07	0	-0.0976108	0.757724	-0.0923819	0.926395	1	DOWN	No	No
ENSMUSG00000002908	Kcnn1	ENSMUST00000110081;ENSMUST00000110078;ENSMUST00000212086;ENSMUST00000212509;ENSMUST00000212084;ENSMUST00000212414	GO:0043025(neuronal cell body);GO:0016021(integral component of membrane);GO:0016020(membrane);GO:0071805(potassium ion transmembrane transport);GO:0006813(potassium ion transport);GO:0046982(protein heterodimerization activity);GO:0016286(small conductance calcium-activated potassium channel activity);GO:0015269(calcium-activated potassium channel activity);GO:0005516(calmodulin binding);GO:0005…	04911(Insulin secretion);04911(Insulin secretion)			potassium intermediate/small conductance calcium-activated channel, subfamily N, member 1 [Source:MGI Symbol;Acc:MGI:1933993]	0.07	0.04	-0.0410273	0.757724	-0.0395922	0.968418	1	DOWN	No	No
ENSMUSG00000003271	Sult2b1	ENSMUST00000075571;ENSMUST00000209739;ENSMUST00000210754;ENSMUST00000210147;ENSMUST00000209435	GO:0004027(alcohol sulfotransferase activity);GO:0008146(sulfotransferase activity);GO:0016740(transferase activity);GO:0050294(steroid sulfotransferase activity);GO:0000103(sulfate assimilation);GO:0006629(lipid metabolic process);GO:0008202(steroid metabolic process);GO:0005737(cytoplasm);GO:0005783(endoplasmic reticulum);GO:0005829(cytosol);GO:0043231(intracellular membrane-bounded organelle);…	00140(Steroid hormone biosynthesis);00140(Steroid hormone biosynthesis)			sulfotransferase family, cytosolic, 2B, member 1 [Source:MGI Symbol;Acc:MGI:1926342]	0.15	0.08	-0.0906025	0.757724	-0.0923819	0.926395	1	DOWN	No	No
ENSMUSG00000003279	Dlgap1	ENSMUST00000133983;ENSMUST00000060072;ENSMUST00000126801;ENSMUST00000150260;ENSMUST00000097288	GO:0045202(synapse);GO:0023052(signaling);GO:0007268(chemical synaptic transmission);GO:0005886(plasma membrane);GO:0014069(postsynaptic density);GO:0016020(membrane);GO:0030054(cell junction);GO:0045211(postsynaptic membrane);GO:0045211(postsynaptic membrane)	04724(Glutamatergic synapse);04724(Glutamatergic synapse)			discs, large (Drosophila) homolog-associated protein 1 [Source:MGI Symbol;Acc:MGI:1346065]	0.04	0.03	-0.0139392	0.757724	-0.0131974	0.98947	1	DOWN	No	No
ENSMUSG00000003309	Ap1m2	ENSMUST00000213762;ENSMUST00000115433;ENSMUST00000003397;ENSMUST00000213483;ENSMUST00000213250	GO:0043231(intracellular membrane-bounded organelle);GO:0030131(clathrin adaptor complex);GO:0016192(vesicle-mediated transport);GO:0015031(protein transport);GO:0006886(intracellular protein transport);GO:0006810(transport);GO:0006810(transport)	04142(Lysosome);04142(Lysosome)			adaptor protein complex AP-1, mu 2 subunit [Source:MGI Symbol;Acc:MGI:1336974]	0	0.11	0.15056	0.757724	0.145172	0.884575	1	UP	No	No
ENSMUSG00000003341	Atp8b3	ENSMUST00000020383;ENSMUST00000219648	GO:0000166(nucleotide binding);GO:0000287(magnesium ion binding);GO:0004012(phospholipid-translocating ATPase activity);GO:0005524(ATP binding);GO:0016787(hydrolase activity);GO:0046872(metal ion binding);GO:0006810(transport);GO:0006869(lipid transport);GO:0007030(Golgi organization);GO:0007339(binding of sperm to zona pellucida);GO:0015914(phospholipid transport);GO:0045332(phospholipid translo…				ATPase, class I, type 8B, member 3 [Source:MGI Symbol;Acc:MGI:1914581]	0.11	0.03	-0.107915	0.757724	-0.105579	0.915916	1	DOWN	No	No
ENSMUSG00000003379	Cd79a	ENSMUST00000003469	GO:0004888(transmembrane signaling receptor activity);GO:0005515(protein binding);GO:0002250(adaptive immune response);GO:0002376(immune system process);GO:0007166(cell surface receptor signaling pathway);GO:0030183(B cell differentiation);GO:0042100(B cell proliferation);GO:0042113(B cell activation);GO:0050853(B cell receptor signaling pathway);GO:0005771(multivesicular body);GO:0005886(plasma …	04662(B cell receptor signaling pathway);05340(Primary immunodeficiency)			CD79A antigen (immunoglobulin-associated alpha) [Source:MGI Symbol;Acc:MGI:101774]	0.7	0.77	0.0582146	0.757724	0.0923819	0.926395	1	UP	No	No
ENSMUSG00000003411	Rab3b	ENSMUST00000106650;ENSMUST00000106651;ENSMUST00000003502;ENSMUST00000157062	GO:0003924(GTPase activity);GO:0005525(GTP binding);GO:0019003(GDP binding);GO:0031489(myosin V binding);GO:0007264(small GTPase mediated signal transduction);GO:0019882(antigen processing and presentation);GO:0051586(positive regulation of dopamine uptake involved in synaptic transmission);GO:0097494(regulation of vesicle size);GO:0005737(cytoplasm);GO:0005829(cytosol);GO:0031982(vesicle);GO:004…	04530(Tight junction);04530(Tight junction)			RAB3B, member RAS oncogene family [Source:MGI Symbol;Acc:MGI:1917158]	0.01	0.03	0.028289	0.757724	0.0263948	0.978942	1	UP	No	No
ENSMUSG00000003418	St8sia6	ENSMUST00000003509	GO:0008373(sialyltransferase activity);GO:0016740(transferase activity);GO:0016757(transferase activity, transferring glycosyl groups);GO:0006486(protein glycosylation);GO:0097503(sialylation);GO:0005794(Golgi apparatus);GO:0016020(membrane);GO:0016021(integral component of membrane);GO:0030173(integral component of Golgi membrane);GO:0001574(ganglioside biosynthetic process);GO:0006493(protein O…				ST8 alpha-N-acetyl-neuraminide alpha-2,8-sialyltransferase 6 [Source:MGI Symbol;Acc:MGI:2386797]	0.12	0.01	-0.149143	0.757724	-0.145172	0.884575	1	DOWN	No	No
ENSMUSG00000003436	Dll3	ENSMUST00000108315;ENSMUST00000145512	GO:0005112(Notch binding);GO:0005509(calcium ion binding);GO:0005515(protein binding);GO:0001501(skeletal system development);GO:0001701(in utero embryonic development);GO:0001709(cell fate determination);GO:0001756(somitogenesis);GO:0007219(Notch signaling pathway);GO:0007275(multicellular organism development);GO:0007386(compartment pattern specification);GO:0007399(nervous system development);…	04330(Notch signaling pathway);04330(Notch signaling pathway)			delta-like 3 (Drosophila) [Source:MGI Symbol;Acc:MGI:1096877]	0.02	0.02	0	0.757724	0	1	1		No	No
ENSMUSG00000003469	Phyhip	ENSMUST00000003561;ENSMUST00000159180	GO:0005515(protein binding);GO:0005575(cellular_component);GO:0005575(cellular_component)				phytanoyl-CoA hydroxylase interacting protein [Source:MGI Symbol;Acc:MGI:1860417]	0.04	0	-0.0565835	0.757724	-0.0527896	0.9579	1	DOWN	No	No
ENSMUSG00000003477	Inmt	ENSMUST00000003569;ENSMUST00000152720	GO:0004790(thioether S-methyltransferase activity);GO:0008168(methyltransferase activity);GO:0016740(transferase activity);GO:0030748(amine N-methyltransferase activity);GO:0098615(dimethyl selenide methyltransferase activity);GO:0001887(selenium compound metabolic process);GO:0009308(amine metabolic process);GO:0009636(response to toxic substance);GO:0032259(methylation);GO:0005737(cytoplasm);GO…	00380(Tryptophan metabolism);00450(Selenocompound metabolism);00450(Selenocompound metabolism)			indolethylamine N-methyltransferase [Source:MGI Symbol;Acc:MGI:102963]	0.19	0.35	0.181998	0.757724	0.211159	0.832764	1	UP	No	No
ENSMUSG00000003657	Calb2	ENSMUST00000212297;ENSMUST00000003754	GO:0005509(calcium ion binding);GO:0046872(metal ion binding);GO:0051480(regulation of cytosolic calcium ion concentration);GO:0005634(nucleus);GO:0005737(cytoplasm);GO:0005829(cytosol);GO:0005921(gap junction);GO:0043005(neuron projection);GO:0043195(terminal bouton);GO:0045202(synapse);GO:0045202(synapse)				calbindin 2 [Source:MGI Symbol;Acc:MGI:101914]	0.13	0.09	-0.0519946	0.757724	-0.0527896	0.9579	1	DOWN	No	No
ENSMUSG00000003863	Ppfia3	ENSMUST00000210479;ENSMUST00000211067;ENSMUST00000211098;ENSMUST00000003961;ENSMUST00000210586;ENSMUST00000210248;ENSMUST00000209424	GO:0003674(molecular_function);GO:0007269(neurotransmitter secretion);GO:0048172(regulation of short-term neuronal synaptic plasticity);GO:0001669(acrosomal vesicle);GO:0005737(cytoplasm);GO:0031410(cytoplasmic vesicle);GO:0048786(presynaptic active zone);GO:0098875(epididymosome);GO:0098875(epididymosome)				protein tyrosine phosphatase, receptor type, f polypeptide (PTPRF), interacting protein (liprin), alpha 3 [Source:MGI Symbol;Acc:MGI:1924037]	0.17	0.14	-0.0374747	0.757724	-0.0395922	0.968418	1	DOWN	No	No
ENSMUSG00000003872	Lin7b	ENSMUST00000003971;ENSMUST00000211416;ENSMUST00000209756;ENSMUST00000209226	GO:0005515(protein binding);GO:0019904(protein domain specific binding);GO:0030165(PDZ domain binding);GO:0006810(transport);GO:0006887(exocytosis);GO:0007269(neurotransmitter secretion);GO:0015031(protein transport);GO:0045199(maintenance of epithelial cell apical/basal polarity);GO:1903361(protein localization to basolateral plasma membrane);GO:0005886(plasma membrane);GO:0005911(cell-cell junc…				lin-7 homolog B (C. elegans) [Source:MGI Symbol;Acc:MGI:1330858]	0.14	0.02	-0.160465	0.757724	-0.158369	0.874166	1	DOWN	No	No
ENSMUSG00000003882	Il7r	ENSMUST00000003981	GO:0004896(cytokine receptor activity);GO:0000902(cell morphogenesis);GO:0001915(negative regulation of T cell mediated cytotoxicity);GO:0002377(immunoglobulin production);GO:0008361(regulation of cell size);GO:0010628(positive regulation of gene expression);GO:0016049(cell growth);GO:0019221(cytokine-mediated signaling pathway);GO:0030217(T cell differentiation);GO:0033089(positive regulation of…	04060(Cytokine-cytokine receptor interaction);04068(FoxO signaling pathway);04151(PI3K-Akt signaling pathway);04630(Jak-STAT signaling pathway);04640(Hematopoietic cell lineage);05340(Primary immunodeficiency)			interleukin 7 receptor [Source:MGI Symbol;Acc:MGI:96562]	0.98	0.92	-0.0443941	0.757724	-0.0791845	0.936886	1	DOWN	No	No
ENSMUSG00000003934	Efnb3	ENSMUST00000004036	GO:0046875(ephrin receptor binding);GO:0007275(multicellular organism development);GO:0007399(nervous system development);GO:0007411(axon guidance);GO:0007628(adult walking behavior);GO:0016198(axon choice point recognition);GO:0030154(cell differentiation);GO:0031295(T cell costimulation);GO:0048013(ephrin receptor signaling pathway);GO:0016020(membrane);GO:0016021(integral component of membrane)	04360(Axon guidance)			ephrin B3 [Source:MGI Symbol;Acc:MGI:109196]	0.71	0.88	0.136736	0.757724	0.224356	0.82248	1	UP	No	No
ENSMUSG00000004035	Gstm7	ENSMUST00000004137;ENSMUST00000133947;ENSMUST00000124215	GO:0004364(glutathione transferase activity);GO:0004602(glutathione peroxidase activity);GO:0005102(receptor binding);GO:0016740(transferase activity);GO:0019899(enzyme binding);GO:0042803(protein homodimerization activity);GO:0043295(glutathione binding);GO:0006749(glutathione metabolic process);GO:0008152(metabolic process);GO:0010880(regulation of release of sequestered calcium ion into cytoso…	00480(Glutathione metabolism);00980(Metabolism of xenobiotics by cytochrome P450);00982(Drug metabolism - cytochrome P450);05204(Chemical carcinogenesis);05204(Chemical carcinogenesis)	K00799	EC:2.5.1.18	glutathione S-transferase, mu 7 [Source:MGI Symbol;Acc:MGI:1915562]	0.16	0.19	0.0368368	0.757724	0.0395922	0.968418	1	UP	No	No
ENSMUSG00000004110	Cacna1e	ENSMUST00000187541;ENSMUST00000211821	GO:0016021(integral component of membrane);GO:0016020(membrane);GO:0005891(voltage-gated calcium channel complex);GO:0070588(calcium ion transmembrane transport);GO:0055085(transmembrane transport);GO:0034765(regulation of ion transmembrane transport);GO:0006816(calcium ion transport);GO:0006811(ion transport);GO:0005509(calcium ion binding);GO:0005262(calcium channel activity);GO:0005245(voltage…	04010(MAPK signaling pathway);04020(Calcium signaling pathway);04930(Type II diabetes mellitus);04930(Type II diabetes mellitus)			calcium channel, voltage-dependent, R type, alpha 1E subunit [Source:MGI Symbol;Acc:MGI:106217]	0	0	0	0.757724	0				No	No
ENSMUSG00000004113	Cacna1b	ENSMUST00000070864;ENSMUST00000102939;ENSMUST00000100348;ENSMUST00000155356	GO:0016021(integral component of membrane);GO:0016020(membrane);GO:0005891(voltage-gated calcium channel complex);GO:0070588(calcium ion transmembrane transport);GO:0055085(transmembrane transport);GO:0034765(regulation of ion transmembrane transport);GO:0006816(calcium ion transport);GO:0006811(ion transport);GO:0005509(calcium ion binding);GO:0005262(calcium channel activity);GO:0005245(voltage…	04010(MAPK signaling pathway);04020(Calcium signaling pathway);04721(Synaptic vesicle cycle);04723(Retrograde endocannabinoid signaling);04725(Cholinergic synapse);04726(Serotonergic synapse);04727(GABAergic synapse);04728(Dopaminergic synapse);04742(Taste transduction);04930(Type II diabetes mellitus);05032(Morphine addiction);05033(Nicotine addiction);05033(Nicotine addiction)			calcium channel, voltage-dependent, N type, alpha 1B subunit [Source:MGI Symbol;Acc:MGI:88296]	0.55	0.16	-0.418143	0.757724	-0.514699	0.606763	1	DOWN	No	No
ENSMUSG00000004187	Kifc2	ENSMUST00000004294	GO:0005874(microtubule);GO:0007018(microtubule-based movement);GO:0008017(microtubule binding);GO:0005524(ATP binding);GO:0003777(microtubule motor activity);GO:0003774(motor activity);GO:0000166(nucleotide binding)				kinesin family member C2 [Source:MGI Symbol;Acc:MGI:109187]	1.26	0.42	-0.670432	0.757724	-1.10858	0.26761	0.609459	DOWN	No	No
ENSMUSG00000004267	Eno2	ENSMUST00000147307;ENSMUST00000112476;ENSMUST00000004378;ENSMUST00000125436;ENSMUST00000139763;ENSMUST00000146712;ENSMUST00000135626;ENSMUST00000151214;ENSMUST00000149652;ENSMUST00000128701;ENSMUST00000147004	GO:0000015(phosphopyruvate hydratase complex);GO:0006096(glycolytic process);GO:0004634(phosphopyruvate hydratase activity);GO:0000287(magnesium ion binding);GO:0016829(lyase activity);GO:0046872(metal ion binding);GO:0001917(photoreceptor inner segment);GO:0005615(extracellular space);GO:0005622(intracellular);GO:0005737(cytoplasm);GO:0005886(plasma membrane);GO:0016020(membrane);GO:0043025(neur…	00010(Glycolysis / Gluconeogenesis);01200(Carbon metabolism);01230(Biosynthesis of amino acids);03018(RNA degradation);04066(HIF-1 signaling pathway);04066(HIF-1 signaling pathway)	K01689	EC:4.2.1.11	enolase 2, gamma neuronal [Source:MGI Symbol;Acc:MGI:95394]	0.88	1.05	0.124891	0.757724	0.224356	0.82248	1	UP	No	No
ENSMUSG00000004328	Hif3a	ENSMUST00000108492;ENSMUST00000139224	GO:0000981(RNA polymerase II transcription factor activity, sequence-specific DNA binding);GO:0003677(DNA binding);GO:0003700(transcription factor activity, sequence-specific DNA binding);GO:0003713(transcription coactivator activity);GO:0003714(transcription corepressor activity);GO:0005515(protein binding);GO:0046983(protein dimerization activity);GO:0001525(angiogenesis);GO:0001666(response to…				hypoxia inducible factor 3, alpha subunit [Source:MGI Symbol;Acc:MGI:1859778]	0.03	0.05	0.027745	0.757724	0.0263948	0.978942	1	UP	No	No
ENSMUSG00000004347	Pde1c	ENSMUST00000044505;ENSMUST00000114327;ENSMUST00000166102	GO:0004114(3',5'-cyclic-nucleotide phosphodiesterase activity);GO:0004117(calmodulin-dependent cyclic-nucleotide phosphodiesterase activity);GO:0005516(calmodulin binding);GO:0008081(phosphoric diester hydrolase activity);GO:0016787(hydrolase activity);GO:0046872(metal ion binding);GO:0048101(calcium- and calmodulin-regulated 3',5'-cyclic-GMP phosphodiesterase activity);GO:0007165(signal transduc…	00230(Purine metabolism);04020(Calcium signaling pathway);04740(Olfactory transduction);05032(Morphine addiction);05032(Morphine addiction)	K13298	EC:3.1.4.17	phosphodiesterase 1C [Source:MGI Symbol;Acc:MGI:108413]	0	0	0	0.757724	0				No	No
ENSMUSG00000004359	Spic	ENSMUST00000004473;ENSMUST00000133724;ENSMUST00000144338	GO:0000978(RNA polymerase II core promoter proximal region sequence-specific DNA binding);GO:0000981(RNA polymerase II transcription factor activity, sequence-specific DNA binding);GO:0001077(transcriptional activator activity, RNA polymerase II core promoter proximal region sequence-specific binding);GO:0003677(DNA binding);GO:0003700(transcription factor activity, sequence-specific DNA binding)…				Spi-C transcription factor (Spi-1/PU.1 related) [Source:MGI Symbol;Acc:MGI:1341168]	0.14	0.22	0.0978473	0.757724	0.105579	0.915916	1	UP	No	No
ENSMUSG00000004371	Il11	ENSMUST00000094892	GO:0050731(positive regulation of peptidyl-tyrosine phosphorylation);GO:0046888(negative regulation of hormone secretion);GO:0045944(positive regulation of transcription from RNA polymerase II promoter);GO:0043410(positive regulation of MAPK cascade);GO:0033138(positive regulation of peptidyl-serine phosphorylation);GO:0008284(positive regulation of cell proliferation);GO:0008083(growth factor ac…	04060(Cytokine-cytokine receptor interaction);04630(Jak-STAT signaling pathway);04640(Hematopoietic cell lineage);05323(Rheumatoid arthritis)			interleukin 11 [Source:MGI Symbol;Acc:MGI:107613]	0.21	0.13	-0.0986843	0.757724	-0.105579	0.915916	1	DOWN	No	No
ENSMUSG00000004500	Zfp324	ENSMUST00000038701;ENSMUST00000124387;ENSMUST00000128293	GO:0003674(molecular_function);GO:0003676(nucleic acid binding);GO:0046872(metal ion binding);GO:0006355(regulation of transcription, DNA-templated);GO:0008150(biological_process);GO:0005575(cellular_component);GO:0005622(intracellular);GO:0005622(intracellular)				zinc finger protein 324 [Source:MGI Symbol;Acc:MGI:2444641]	0.39	1.35	0.757576	0.757724	1.26695	0.205173	0.489855	UP	No	No
ENSMUSG00000004540	Psg17	ENSMUST00000004655	GO:0005515(protein binding);GO:0043395(heparan sulfate proteoglycan binding);GO:0006955(immune response);GO:0007565(female pregnancy)				pregnancy specific glycoprotein 17 [Source:MGI Symbol;Acc:MGI:1347250]	0.55	0.52	-0.0281969	0.757724	-0.0395922	0.968418	1	DOWN	No	No
ENSMUSG00000004542	Psg19	ENSMUST00000004657;ENSMUST00000182916	GO:0003674(molecular_function);GO:0008150(biological_process);GO:0005575(cellular_component);GO:0005575(cellular_component)				pregnancy specific glycoprotein 19 [Source:MGI Symbol;Acc:MGI:1347252]	0.04	0.01	-0.0422282	0.757724	-0.0395922	0.968418	1	DOWN	No	No
ENSMUSG00000004668	Abca13	ENSMUST00000042740	GO:0000166(nucleotide binding);GO:0005215(transporter activity);GO:0005524(ATP binding);GO:0016887(ATPase activity);GO:0042626(ATPase activity, coupled to transmembrane movement of substances);GO:0006810(transport);GO:0006869(lipid transport);GO:0055085(transmembrane transport);GO:0016020(membrane);GO:0016021(integral component of membrane);GO:0043231(intracellular membrane-bounded organelle)	02010(ABC transporters)			ATP-binding cassette, sub-family A (ABC1), member 13 [Source:MGI Symbol;Acc:MGI:2388707]	0	0	0	0.757724	0				No	No
ENSMUSG00000004892	Bcan	ENSMUST00000090971;ENSMUST00000192274;ENSMUST00000191627	GO:0005201(extracellular matrix structural constituent);GO:0005509(calcium ion binding);GO:0005540(hyaluronic acid binding);GO:0030246(carbohydrate binding);GO:0001501(skeletal system development);GO:0007155(cell adhesion);GO:0021766(hippocampus development);GO:0005576(extracellular region);GO:0005578(proteinaceous extracellular matrix);GO:0005578(proteinaceous extracellular matrix)				brevican [Source:MGI Symbol;Acc:MGI:1096385]	0.06	0.07	0.0135465	0.757724	0.0131974	0.98947	1	UP	No	No
ENSMUSG00000004894	Hapln2	ENSMUST00000160737	GO:0007155(cell adhesion);GO:0005540(hyaluronic acid binding);GO:0005201(extracellular matrix structural constituent);GO:0001501(skeletal system development);GO:0007417(central nervous system development);GO:0008065(establishment of blood-nerve barrier);GO:0085029(extracellular matrix assembly);GO:0005576(extracellular region);GO:0005578(proteinaceous extracellular matrix)				hyaluronan and proteoglycan link protein 2 [Source:MGI Symbol;Acc:MGI:2137300]	0.02	0.04	0.0280144	0.757724	0.0263948	0.978942	1	UP	No	No
ENSMUSG00000004961	Syt5	ENSMUST00000065957;ENSMUST00000206023	GO:0000149(SNARE binding);GO:0001786(phosphatidylserine binding);GO:0005509(calcium ion binding);GO:0005544(calcium-dependent phospholipid binding);GO:0005546(phosphatidylinositol-4,5-bisphosphate binding);GO:0019905(syntaxin binding);GO:0030276(clathrin binding);GO:0046872(metal ion binding);GO:0046982(protein heterodimerization activity);GO:0006906(vesicle fusion);GO:0017158(regulation of calci…				synaptotagmin V [Source:MGI Symbol;Acc:MGI:1926368]	0	0	0	0.757724	0				No	No
ENSMUSG00000004988	Fxyd4	ENSMUST00000203082;ENSMUST00000203433;ENSMUST00000005114	GO:0005216(ion channel activity);GO:0017080(sodium channel regulator activity);GO:0051117(ATPase binding);GO:0006810(transport);GO:0006811(ion transport);GO:0034220(ion transmembrane transport);GO:0071805(potassium ion transmembrane transport);GO:2000649(regulation of sodium ion transmembrane transporter activity);GO:0005887(integral component of plasma membrane);GO:0016020(membrane);GO:0016021(i…	04960(Aldosterone-regulated sodium reabsorption);04960(Aldosterone-regulated sodium reabsorption)			FXYD domain-containing ion transport regulator 4 [Source:MGI Symbol;Acc:MGI:1889005]	0.06	0	-0.0840643	0.757724	-0.0791845	0.936886	1	DOWN	No	No
ENSMUSG00000005045	Chd5	ENSMUST00000030775;ENSMUST00000005175	GO:0016607(nuclear speck);GO:0016581(NuRD complex);GO:0016020(membrane);GO:0005829(cytosol);GO:0005654(nucleoplasm);GO:0005634(nucleus);GO:0000792(heterochromatin);GO:1901798(positive regulation of signal transduction by p53 class mediator);GO:0098532(histone H3-K27 trimethylation);GO:0060850(regulation of transcription involved in cell fate commitment);GO:0045595(regulation of cell differentiati…				chromodomain helicase DNA binding protein 5 [Source:MGI Symbol;Acc:MGI:3036258]	0.33	0.13	-0.235103	0.757724	-0.263948	0.79182	1	DOWN	No	No
ENSMUSG00000005089	Slc1a2	ENSMUST00000080210	GO:0005313(L-glutamate transmembrane transporter activity);GO:0008509(anion transmembrane transporter activity);GO:0015293(symporter activity);GO:0015501(glutamate:sodium symporter activity);GO:0006810(transport);GO:0007399(nervous system development);GO:0007632(visual behavior);GO:0009416(response to light stimulus);GO:0009611(response to wounding);GO:0010259(multicellular organism aging);GO:001…	04724(Glutamatergic synapse);05014(Amyotrophic lateral sclerosis (ALS))			solute carrier family 1 (glial high affinity glutamate transporter), member 2 [Source:MGI Symbol;Acc:MGI:101931]	0	0	0	0.757724	0				No	No
ENSMUSG00000005131	4930550C14Rik	ENSMUST00000214790;ENSMUST00000215668;ENSMUST00000005262;ENSMUST00000217318	GO:0003674(molecular_function);GO:0008150(biological_process);GO:0005575(cellular_component);GO:0005575(cellular_component)				RIKEN cDNA 4930550C14 gene [Source:MGI Symbol;Acc:MGI:1922561]	0.14	0.14	0	0.757724	0	1	1		No	No
ENSMUSG00000005202	Shbg	ENSMUST00000005334	GO:0070062(extracellular exosome);GO:0005496(steroid binding);GO:0008289(lipid binding);GO:0005576(extracellular region)				sex hormone binding globulin [Source:MGI Symbol;Acc:MGI:98295]	0.38	0	-0.464668	0.757724	-0.501502	0.616018	1	DOWN	No	No
ENSMUSG00000005220	Corin	ENSMUST00000167460;ENSMUST00000005352	GO:0004252(serine-type endopeptidase activity);GO:0005044(scavenger receptor activity);GO:0008233(peptidase activity);GO:0008236(serine-type peptidase activity);GO:0016787(hydrolase activity);GO:0003050(regulation of systemic arterial blood pressure by atrial natriuretic peptide);GO:0006508(proteolysis);GO:0006898(receptor-mediated endocytosis);GO:0007565(female pregnancy);GO:0008217(regulation o…				corin [Source:MGI Symbol;Acc:MGI:1349451]	0.03	0.02	-0.0140752	0.757724	-0.0131974	0.98947	1	DOWN	No	No
ENSMUSG00000005267	Zfp287	ENSMUST00000150336;ENSMUST00000149228;ENSMUST00000005399;ENSMUST00000128370;ENSMUST00000127732	GO:0003676(nucleic acid binding);GO:0003700(transcription factor activity, sequence-specific DNA binding);GO:0006355(regulation of transcription, DNA-templated);GO:0005622(intracellular);GO:0003677(DNA binding);GO:0046872(metal ion binding);GO:0006351(transcription, DNA-templated);GO:0042035(regulation of cytokine biosynthetic process);GO:0045893(positive regulation of transcription, DNA-template…				zinc finger protein 287 [Source:MGI Symbol;Acc:MGI:2176561]	0.05	0.1	0.0671142	0.757724	0.065987	0.947388	1	UP	No	No
ENSMUSG00000005320	Fgfr4	ENSMUST00000005452	GO:0030133(transport vesicle);GO:0016021(integral component of membrane);GO:0016020(membrane);GO:0005911(cell-cell junction);GO:0005887(integral component of plasma membrane);GO:0005886(plasma membrane);GO:0005794(Golgi apparatus);GO:0005783(endoplasmic reticulum);GO:2000573(positive regulation of DNA biosynthetic process);GO:0070857(regulation of bile acid biosynthetic process);GO:0070374(positi…	04010(MAPK signaling pathway);04014(Ras signaling pathway);04015(Rap1 signaling pathway);04144(Endocytosis);04151(PI3K-Akt signaling pathway);04550(Signaling pathways regulating pluripotency of stem cells);04810(Regulation of actin cytoskeleton)			fibroblast growth factor receptor 4 [Source:MGI Symbol;Acc:MGI:95525]	0	0.01	0.0143553	0.757724	0.0131974	0.98947	1	UP	No	No
ENSMUSG00000005493	Msh4	ENSMUST00000005630;ENSMUST00000190449	GO:0006298(mismatch repair);GO:0030983(mismatched DNA binding);GO:0005524(ATP binding);GO:0000166(nucleotide binding);GO:0003677(DNA binding);GO:0001541(ovarian follicle development);GO:0007126(meiotic nuclear division);GO:0007129(synapsis);GO:0007283(spermatogenesis);GO:0007292(female gamete generation);GO:0051321(meiotic cell cycle);GO:0000793(condensed chromosome);GO:0000794(condensed nuclear …				mutS homolog 4 [Source:MGI Symbol;Acc:MGI:1860077]	0.01	0	-0.0143553	0.757724	-0.0131974	0.98947	1	DOWN	No	No
ENSMUSG00000005503	Evx1	ENSMUST00000031787	GO:0003677(DNA binding);GO:0043565(sequence-specific DNA binding);GO:0006355(regulation of transcription, DNA-templated);GO:0007275(multicellular organism development);GO:0009792(embryo development ending in birth or egg hatching);GO:0021913(regulation of transcription from RNA polymerase II promoter involved in ventral spinal cord interneuron specification);GO:0045944(positive regulation of tran…				even-skipped homeobox 1 [Source:MGI Symbol;Acc:MGI:95461]	0	0.02	0.0285692	0.757724	0.0263948	0.978942	1	UP	No	No
ENSMUSG00000005540	Fcer2a	ENSMUST00000005678;ENSMUST00000207327	GO:0019863(IgE binding);GO:0030246(carbohydrate binding);GO:0046872(metal ion binding);GO:0002925(positive regulation of humoral immune response mediated by circulating immunoglobulin);GO:0051000(positive regulation of nitric-oxide synthase activity);GO:0051712(positive regulation of killing of cells of other organism);GO:0051770(positive regulation of nitric-oxide synthase biosynthetic process);…	04640(Hematopoietic cell lineage);05169(Epstein-Barr virus infection);05169(Epstein-Barr virus infection)			Fc receptor, IgE, low affinity II, alpha polypeptide [Source:MGI Symbol;Acc:MGI:95497]	0	0.04	0.0565835	0.757724	0.0527896	0.9579	1	UP	No	No
ENSMUSG00000005580	Adcy9	ENSMUST00000117801;ENSMUST00000120080;ENSMUST00000005719	GO:0000166(nucleotide binding);GO:0004016(adenylate cyclase activity);GO:0004383(guanylate cyclase activity);GO:0005524(ATP binding);GO:0016829(lyase activity);GO:0016849(phosphorus-oxygen lyase activity);GO:0046872(metal ion binding);GO:0006171(cAMP biosynthetic process);GO:0006182(cGMP biosynthetic process);GO:0007189(adenylate cyclase-activating G-protein coupled receptor signaling pathway);GO…	00230(Purine metabolism);04015(Rap1 signaling pathway);04020(Calcium signaling pathway);04022(cGMP - PKG signaling pathway);04024(cAMP signaling pathway);04062(Chemokine signaling pathway);04114(Oocyte meiosis);04261(Adrenergic signaling in cardiomyocytes);04270(Vascular smooth muscle contraction);04540(Gap junction);04611(Platelet activation);04713(Circadian entrainment);04723(Retrograde endocan…			adenylate cyclase 9 [Source:MGI Symbol;Acc:MGI:108450]	0.83	0.5	-0.286881	0.757724	-0.435515	0.663189	1	DOWN	No	No
ENSMUSG00000005696	Sh2d1a	ENSMUST00000189753;ENSMUST00000005839	GO:0005070(SH3/SH2 adaptor activity);GO:0005515(protein binding);GO:0002250(adaptive immune response);GO:0002376(immune system process);GO:0006959(humoral immune response);GO:0006968(cellular defense response);GO:0007267(cell-cell signaling);GO:0009967(positive regulation of signal transduction);GO:0045087(innate immune response);GO:0045954(positive regulation of natural killer cell mediated cyto…	04650(Natural killer cell mediated cytotoxicity);05162(Measles);05162(Measles)			SH2 domain containing 1A [Source:MGI Symbol;Acc:MGI:1328352]	0.04	0.11	0.0939761	0.757724	0.0923819	0.926395	1	UP	No	No
ENSMUSG00000005836	Gata6	ENSMUST00000047762	GO:0000979(RNA polymerase II core promoter sequence-specific DNA binding);GO:0000981(RNA polymerase II transcription factor activity, sequence-specific DNA binding);GO:0001103(RNA polymerase II repressing transcription factor binding);GO:0001228(transcriptional activator activity, RNA polymerase II transcription regulatory region sequence-specific binding);GO:0003677(DNA binding);GO:0003682(chrom…				GATA binding protein 6 [Source:MGI Symbol;Acc:MGI:107516]	0	0.02	0.0285692	0.757724	0.0263948	0.978942	1	UP	No	No
ENSMUSG00000005864	Cnga2	ENSMUST00000006020	GO:0016021(integral component of membrane);GO:0016020(membrane);GO:0071805(potassium ion transmembrane transport);GO:0055085(transmembrane transport);GO:0034220(ion transmembrane transport);GO:0006813(potassium ion transport);GO:0006811(ion transport);GO:0006810(transport);GO:0005249(voltage-gated potassium channel activity);GO:0005216(ion channel activity);GO:0000166(nucleotide binding);GO:00055…	04024(cAMP signaling pathway)			cyclic nucleotide gated channel alpha 2 [Source:MGI Symbol;Acc:MGI:108040]	0	0	0	0.757724	0				No	No
ENSMUSG00000005883	Spo11	ENSMUST00000144044;ENSMUST00000109126;ENSMUST00000050442;ENSMUST00000156471	GO:0003677(DNA binding);GO:0003824(catalytic activity);GO:0003918(DNA topoisomerase type II (ATP-hydrolyzing) activity);GO:0005524(ATP binding);GO:0016787(hydrolase activity);GO:0016853(isomerase activity);GO:0016888(endodeoxyribonuclease activity, producing 5'-phosphomonoesters);GO:0016889(endodeoxyribonuclease activity, producing 3'-phosphomonoesters);GO:0046872(metal ion binding);GO:0000706(me…				SPO11 meiotic protein covalently bound to DSB [Source:MGI Symbol;Acc:MGI:1349669]	1.13	0.63	-0.385981	0.757724	-0.65987	0.509337	0.998355	DOWN	No	No
ENSMUSG00000006007	Pdc	ENSMUST00000165062;ENSMUST00000185698	GO:0008479(queuine tRNA-ribosyltransferase activity);GO:0007601(visual perception);GO:0008616(queuosine biosynthetic process);GO:0050896(response to stimulus);GO:0001750(photoreceptor outer segment);GO:0001917(photoreceptor inner segment);GO:0005634(nucleus);GO:0005737(cytoplasm);GO:0005829(cytosol);GO:0005929(cilium);GO:0042995(cell projection);GO:0042995(cell projection)	04740(Olfactory transduction);04740(Olfactory transduction)			phosducin [Source:MGI Symbol;Acc:MGI:98090]	0	0.01	0.0143553	0.757724	0.0131974	0.98947	1	UP	No	No
ENSMUSG00000006056	Calcoco2	ENSMUST00000068686	GO:0048471(perinuclear region of cytoplasm);GO:0031410(cytoplasmic vesicle);GO:0016605(PML body);GO:0016020(membrane);GO:0005856(cytoskeleton);GO:0005776(autophagosome);GO:0005737(cytoplasm);GO:0000421(autophagosome membrane);GO:1901098(positive regulation of autophagosome maturation);GO:0098792(xenophagy);GO:0006914(autophagy)				calcium binding and coiled-coil domain 2 [Source:MGI Symbol;Acc:MGI:1343177]	0.07	0.04	-0.0410273	0.757724	-0.0395922	0.968418	1	DOWN	No	No
ENSMUSG00000006143	Upk3bl	ENSMUST00000139999;ENSMUST00000006303;ENSMUST00000139549;ENSMUST00000122979	GO:0016021(integral component of membrane);GO:0016020(membrane);GO:0098869(cellular oxidant detoxification);GO:0055114(oxidation-reduction process);GO:0006979(response to oxidative stress);GO:0020037(heme binding);GO:0004601(peroxidase activity);GO:0004601(peroxidase activity)				uroplakin 3B-like [Source:MGI Symbol;Acc:MGI:1916915]	0.09	0.37	0.329848	0.757724	0.369527	0.711735	1	UP	No	No
ENSMUSG00000006216	Clcnkb	ENSMUST00000135486;ENSMUST00000105788	GO:0005216(ion channel activity);GO:0005244(voltage-gated ion channel activity);GO:0005247(voltage-gated chloride channel activity);GO:0005254(chloride channel activity);GO:0005515(protein binding);GO:0046872(metal ion binding);GO:0006810(transport);GO:0006811(ion transport);GO:0006821(chloride transport);GO:0034765(regulation of ion transmembrane transport);GO:0055085(transmembrane transport);GO…	04966(Collecting duct acid secretion);04966(Collecting duct acid secretion)			chloride channel, voltage-sensitive Kb [Source:MGI Symbol;Acc:MGI:1930643]	0	0	0	0.757724	0				No	No
ENSMUSG00000006218	Fam131c	ENSMUST00000006380	GO:0005575(cellular_component);GO:0008150(biological_process);GO:0003674(molecular_function)				family with sequence similarity 131, member C [Source:MGI Symbol;Acc:MGI:2685539]	0	0.13	0.176323	0.757724	0.171566	0.863778	1	UP	No	No
ENSMUSG00000006235	Epor	ENSMUST00000006397;ENSMUST00000213181	GO:0004888(transmembrane signaling receptor activity);GO:0004896(cytokine receptor activity);GO:0004900(erythropoietin receptor activity);GO:0005515(protein binding);GO:0042802(identical protein binding);GO:0003007(heart morphogenesis);GO:0007165(signal transduction);GO:0007420(brain development);GO:0007507(heart development);GO:0016032(viral process);GO:0019221(cytokine-mediated signaling pathwa…	04060(Cytokine-cytokine receptor interaction);04151(PI3K-Akt signaling pathway);04630(Jak-STAT signaling pathway);04640(Hematopoietic cell lineage);04640(Hematopoietic cell lineage)			erythropoietin receptor [Source:MGI Symbol;Acc:MGI:95408]	0.75	1.23	0.349689	0.757724	0.633476	0.526423	1	UP	No	No
ENSMUSG00000006269	Atp6v1b1	ENSMUST00000006431;ENSMUST00000206911;ENSMUST00000206652;ENSMUST00000206052	GO:0005524(ATP binding);GO:0015078(hydrogen ion transmembrane transporter activity);GO:0016820(hydrolase activity, acting on acid anhydrides, catalyzing transmembrane movement of substances);GO:0032403(protein complex binding);GO:0001503(ossification);GO:0006885(regulation of pH);GO:0007588(excretion);GO:0007605(sensory perception of sound);GO:0015991(ATP hydrolysis coupled proton transport);GO:0…	00190(Oxidative phosphorylation);04145(Phagosome);04721(Synaptic vesicle cycle);04966(Collecting duct acid secretion);05323(Rheumatoid arthritis);05323(Rheumatoid arthritis)	K12646	EC:3.6.3.14	ATPase, H+ transporting, lysosomal V1 subunit B1 [Source:MGI Symbol;Acc:MGI:103285]	0.01	0.01	0	0.757724	0	1	1		No	No
ENSMUSG00000006310	Zbtb32	ENSMUST00000108151;ENSMUST00000108150	GO:0046872(metal ion binding);GO:0003676(nucleic acid binding);GO:0003677(DNA binding);GO:0003714(transcription corepressor activity);GO:0008270(zinc ion binding);GO:0001817(regulation of cytokine production);GO:0006351(transcription, DNA-templated);GO:0006355(regulation of transcription, DNA-templated);GO:0030097(hemopoiesis);GO:0042098(T cell proliferation);GO:1903507(negative regulation of nuc…				zinc finger and BTB domain containing 32 [Source:MGI Symbol;Acc:MGI:1891838]	0.22	0.36	0.156726	0.757724	0.184764	0.853414	1	UP	No	No
ENSMUSG00000006311	Etv2	ENSMUST00000108147	GO:0000978(RNA polymerase II core promoter proximal region sequence-specific DNA binding);GO:0001077(transcriptional activator activity, RNA polymerase II core promoter proximal region sequence-specific binding);GO:0003677(DNA binding);GO:0003700(transcription factor activity, sequence-specific DNA binding);GO:0043565(sequence-specific DNA binding);GO:0001701(in utero embryonic development);GO:00…				ets variant 2 [Source:MGI Symbol;Acc:MGI:99253]	0	0	0	0.757724	0				No	No
ENSMUSG00000006313	Upk1a	ENSMUST00000006476	GO:0070062(extracellular exosome);GO:0016021(integral component of membrane);GO:0016020(membrane);GO:0030855(epithelial cell differentiation);GO:0005515(protein binding);GO:0042803(protein homodimerization activity);GO:0048029(monosaccharide binding);GO:0006897(endocytosis);GO:0007165(signal transduction);GO:0007166(cell surface receptor signaling pathway);GO:0051259(protein oligomerization);GO:0…				uroplakin 1A [Source:MGI Symbol;Acc:MGI:98911]	0.31	0.23	-0.0909085	0.757724	-0.105579	0.915916	1	DOWN	No	No
ENSMUSG00000006345	Ggt1	ENSMUST00000140219;ENSMUST00000134503;ENSMUST00000006508;ENSMUST00000156487	GO:0016740(transferase activity);GO:0036374(glutathione hydrolase activity);GO:0006508(proteolysis);GO:0006751(glutathione catabolic process);GO:0016020(membrane);GO:0016021(integral component of membrane);GO:0003840(gamma-glutamyltransferase activity);GO:0008233(peptidase activity);GO:0016746(transferase activity, transferring acyl groups);GO:0016787(hydrolase activity);GO:0002682(regulation of …	00430(Taurine and hypotaurine metabolism);00460(Cyanoamino acid metabolism);00480(Glutathione metabolism);00590(Arachidonic acid metabolism);00590(Arachidonic acid metabolism)	K18592	EC:2.3.2.2;EC:3.4.19.13	gamma-glutamyltransferase 1 [Source:MGI Symbol;Acc:MGI:95706]	0.06	0.01	-0.069709	0.757724	-0.065987	0.947388	1	DOWN	No	No
ENSMUSG00000006389	Mpl	ENSMUST00000102671	GO:0004896(cytokine receptor activity);GO:0038164(thrombopoietin receptor activity);GO:0010628(positive regulation of gene expression);GO:0019221(cytokine-mediated signaling pathway);GO:0030220(platelet formation);GO:0032642(regulation of chemokine production);GO:0038163(thrombopoietin-mediated signaling pathway);GO:0043066(negative regulation of apoptotic process);GO:0048872(homeostasis of numbe…	04060(Cytokine-cytokine receptor interaction);04630(Jak-STAT signaling pathway)			myeloproliferative leukemia virus oncogene [Source:MGI Symbol;Acc:MGI:97076]	0	0	0	0.757724	0				No	No
ENSMUSG00000006464	Bbs1	ENSMUST00000053506	GO:0001103(RNA polymerase II repressing transcription factor binding);GO:0005102(receptor binding);GO:0005113(patched binding);GO:0005119(smoothened binding);GO:0005515(protein binding);GO:0051219(phosphoprotein binding);GO:0000226(microtubule cytoskeleton organization);GO:0001764(neuron migration);GO:0001895(retina homeostasis);GO:0007608(sensory perception of smell);GO:0008104(protein localizat…				Bardet-Biedl syndrome 1 (human) [Source:MGI Symbol;Acc:MGI:1277215]	0.49	0.29	-0.207941	0.757724	-0.263948	0.79182	1	DOWN	No	No
ENSMUSG00000006490	Prl8a9	ENSMUST00000006662	GO:0005576(extracellular region);GO:0005179(hormone activity);GO:0003674(molecular_function);GO:0008150(biological_process);GO:0005575(cellular_component)				prolactin family8, subfamily a, member 9 [Source:MGI Symbol;Acc:MGI:1914560]	0.06	0	-0.0840643	0.757724	-0.0791845	0.936886	1	DOWN	No	No
ENSMUSG00000006529	Itih1	ENSMUST00000163118	GO:0072562(blood microparticle);GO:0070062(extracellular exosome);GO:0030212(hyaluronan metabolic process);GO:0010951(negative regulation of endopeptidase activity);GO:0004867(serine-type endopeptidase inhibitor activity);GO:0030414(peptidase inhibitor activity);GO:0010466(negative regulation of peptidase activity);GO:0005576(extracellular region)				inter-alpha trypsin inhibitor, heavy chain 1 [Source:MGI Symbol;Acc:MGI:96618]	0	0	0	0.757724	0				No	No
ENSMUSG00000006538	Ihh	ENSMUST00000164097;ENSMUST00000189364	GO:0005113(patched binding);GO:0005509(calcium ion binding);GO:0005515(protein binding);GO:0008233(peptidase activity);GO:0016787(hydrolase activity);GO:0046872(metal ion binding);GO:0001501(skeletal system development);GO:0001503(ossification);GO:0001569(branching involved in blood vessel morphogenesis);GO:0001649(osteoblast differentiation);GO:0001701(in utero embryonic development);GO:0001708(…	04340(Hedgehog signaling pathway);04340(Hedgehog signaling pathway)			Indian hedgehog [Source:MGI Symbol;Acc:MGI:96533]	0.11	0.12	0.0129391	0.757724	0.0131974	0.98947	1	UP	No	No
ENSMUSG00000006542	Prkag3	ENSMUST00000160732;ENSMUST00000188073;ENSMUST00000113672;ENSMUST00000081636	GO:0000166(nucleotide binding);GO:0005524(ATP binding);GO:0019901(protein kinase binding);GO:0005978(glycogen biosynthetic process);GO:0006468(protein phosphorylation);GO:0006629(lipid metabolic process);GO:0006631(fatty acid metabolic process);GO:0006633(fatty acid biosynthetic process);GO:0007005(mitochondrion organization);GO:0015758(glucose transport);GO:0061024(membrane organization);GO:0005…	04068(FoxO signaling pathway);04152(AMPK signaling pathway);04710(Circadian rhythm);04910(Insulin signaling pathway);04920(Adipocytokine signaling pathway);04921(Oxytocin signaling pathway);04922(Glucagon signaling pathway);04932(Non-alcoholic fatty liver disease (NAFLD));05410(Hypertrophic cardiomyopathy (HCM));05410(Hypertrophic cardiomyopathy (HCM))			protein kinase, AMP-activated, gamma 3 non-catatlytic subunit [Source:MGI Symbol;Acc:MGI:1891343]	0.07	0.05	-0.0272215	0.757724	-0.0263948	0.978942	1	DOWN	No	No
ENSMUSG00000006567	Atp7b	ENSMUST00000006742	GO:0005802(trans-Golgi network);GO:0016323(basolateral plasma membrane);GO:0031410(cytoplasmic vesicle);GO:0048471(perinuclear region of cytoplasm);GO:0000166(nucleotide binding);GO:0004008(copper-exporting ATPase activity);GO:0005375(copper ion transmembrane transporter activity);GO:0005507(copper ion binding);GO:0005524(ATP binding);GO:0016787(hydrolase activity);GO:0019829(cation-transporting …				ATPase, Cu++ transporting, beta polypeptide [Source:MGI Symbol;Acc:MGI:103297]	0.02	0.04	0.0280144	0.757724	0.0263948	0.978942	1	UP	No	No
ENSMUSG00000006574	Slc4a1	ENSMUST00000006749;ENSMUST00000149993	GO:0005215(transporter activity);GO:0005452(inorganic anion exchanger activity);GO:0005515(protein binding);GO:0008509(anion transmembrane transporter activity);GO:0015106(bicarbonate transmembrane transporter activity);GO:0015108(chloride transmembrane transporter activity);GO:0015301(anion:anion antiporter activity);GO:0030506(ankyrin binding);GO:0042803(protein homodimerization activity);GO:00…	04966(Collecting duct acid secretion);04966(Collecting duct acid secretion)			solute carrier family 4 (anion exchanger), member 1 [Source:MGI Symbol;Acc:MGI:109393]	0.05	0.08	0.040642	0.757724	0.0395922	0.968418	1	UP	No	No
ENSMUSG00000006576	Slc4a3	ENSMUST00000124341;ENSMUST00000129703;ENSMUST00000027415;ENSMUST00000145516;ENSMUST00000138814;ENSMUST00000132612;ENSMUST00000189794;ENSMUST00000154101;ENSMUST00000145258	GO:0005215(transporter activity);GO:0005452(inorganic anion exchanger activity);GO:0008509(anion transmembrane transporter activity);GO:0015297(antiporter activity);GO:0015301(anion:anion antiporter activity);GO:0006810(transport);GO:0006811(ion transport);GO:0006820(anion transport);GO:0015698(inorganic anion transport);GO:0015701(bicarbonate transport);GO:0051453(regulation of intracellular pH)…				solute carrier family 4 (anion exchanger), member 3 [Source:MGI Symbol;Acc:MGI:109350]	1.76	1.28	-0.275634	0.757724	-0.633476	0.526423	1	DOWN	No	No
ENSMUSG00000006586	Runx1t1	ENSMUST00000006761;ENSMUST00000150583;ENSMUST00000105566;ENSMUST00000098256	GO:0003700(transcription factor activity, sequence-specific DNA binding);GO:0003714(transcription corepressor activity);GO:0046872(metal ion binding);GO:0006355(regulation of transcription, DNA-templated);GO:0045892(negative regulation of transcription, DNA-templated);GO:0005515(protein binding);GO:0042803(protein homodimerization activity);GO:0006351(transcription, DNA-templated);GO:0010977(nega…	05200(Pathways in cancer);05202(Transcriptional misregulation in cancers);05221(Acute myeloid leukemia);05221(Acute myeloid leukemia)			runt-related transcription factor 1; translocated to, 1 (cyclin D-related) [Source:MGI Symbol;Acc:MGI:104793]	0.15	0.23	0.0970245	0.757724	0.105579	0.915916	1	UP	No	No
ENSMUSG00000006642	Tcf23	ENSMUST00000006818	GO:0046983(protein dimerization activity);GO:0007275(multicellular organism development);GO:0007517(muscle organ development);GO:0030154(cell differentiation);GO:0005634(nucleus)				transcription factor 23 [Source:MGI Symbol;Acc:MGI:1934960]	0.13	0.01	-0.161967	0.757724	-0.158369	0.874166	1	DOWN	No	No
ENSMUSG00000006711	D130043K22Rik	ENSMUST00000006893	GO:0003674(molecular_function);GO:0001764(neuron migration);GO:0007275(multicellular organism development);GO:0007399(nervous system development);GO:2000171(negative regulation of dendrite development);GO:0005768(endosome);GO:0005769(early endosome);GO:0005886(plasma membrane);GO:0016020(membrane);GO:0016021(integral component of membrane);GO:0031901(early endosome membrane)				RIKEN cDNA D130043K22 gene [Source:MGI Symbol;Acc:MGI:3036268]	0	0.02	0.0285692	0.757724	0.0263948	0.978942	1	UP	No	No
ENSMUSG00000006764	Tph2	ENSMUST00000006949	GO:0004497(monooxygenase activity);GO:0004510(tryptophan 5-monooxygenase activity);GO:0005506(iron ion binding);GO:0016491(oxidoreductase activity);GO:0016597(amino acid binding);GO:0016714(oxidoreductase activity, acting on paired donors, with incorporation or reduction of molecular oxygen, reduced pteridine as one donor, and incorporation of one atom of oxygen);GO:0046872(metal ion binding);GO:…	00380(Tryptophan metabolism);04726(Serotonergic synapse)	K00502	EC:1.14.16.4	tryptophan hydroxylase 2 [Source:MGI Symbol;Acc:MGI:2651811]	0	0.14	0.189034	0.757724	0.184764	0.853414	1	UP	No	No
ENSMUSG00000006777	Krt23	ENSMUST00000006969	GO:0005198(structural molecule activity);GO:0005882(intermediate filament);GO:0008150(biological_process)				keratin 23 [Source:MGI Symbol;Acc:MGI:2148866]	0.15	0.09	-0.0773057	0.757724	-0.0791845	0.936886	1	DOWN	No	No
ENSMUSG00000006784	Ttc25	ENSMUST00000092684;ENSMUST00000132143;ENSMUST00000006976;ENSMUST00000150331	GO:0003674(molecular_function);GO:0008150(biological_process);GO:0005737(cytoplasm);GO:0005856(cytoskeleton);GO:0005929(cilium);GO:0042995(cell projection);GO:0042995(cell projection)				tetratricopeptide repeat domain 25 [Source:MGI Symbol;Acc:MGI:1921657]	0.04	0.01	-0.0422282	0.757724	-0.0395922	0.968418	1	DOWN	No	No
ENSMUSG00000006930	Hap1	ENSMUST00000138603;ENSMUST00000103124;ENSMUST00000173630;ENSMUST00000174635	GO:0005515(protein binding);GO:0044325(ion channel binding);GO:0048403(brain-derived neurotrophic factor binding);GO:0006810(transport);GO:0006887(exocytosis);GO:0006914(autophagy);GO:0008089(anterograde axonal transport);GO:0008090(retrograde axonal transport);GO:0008104(protein localization);GO:0015031(protein transport);GO:0017157(regulation of exocytosis);GO:0021549(cerebellum development);GO…	04727(GABAergic synapse);05016(Huntington's disease);05016(Huntington's disease)			huntingtin-associated protein 1 [Source:MGI Symbol;Acc:MGI:1261831]	0.72	0.41	-0.286713	0.757724	-0.40912	0.682452	1	DOWN	No	No
ENSMUSG00000006948	Klk4	ENSMUST00000007161	GO:0004252(serine-type endopeptidase activity);GO:0008233(peptidase activity);GO:0008236(serine-type peptidase activity);GO:0016787(hydrolase activity);GO:0046872(metal ion binding);GO:0006508(proteolysis);GO:0022617(extracellular matrix disassembly);GO:0030163(protein catabolic process);GO:0031214(biomineral tissue development);GO:0097186(amelogenesis);GO:0005576(extracellular region)				kallikrein related-peptidase 4 (prostase, enamel matrix, prostate) [Source:MGI Symbol;Acc:MGI:1861379]	0	0	0	0.757724	0				No	No
ENSMUSG00000006958	Chrd	ENSMUST00000115423;ENSMUST00000007171;ENSMUST00000153299;ENSMUST00000151150	GO:0008201(heparin binding);GO:0045545(syndecan binding);GO:0001501(skeletal system development);GO:0001649(osteoblast differentiation);GO:0001702(gastrulation with mouth forming second);GO:0001707(mesoderm formation);GO:0002053(positive regulation of mesenchymal cell proliferation);GO:0007275(multicellular organism development);GO:0007389(pattern specification process);GO:0007417(central nervous…	04350(TGF-beta signaling pathway);04350(TGF-beta signaling pathway)			chordin [Source:MGI Symbol;Acc:MGI:1313268]	0.08	0.04	-0.0544478	0.757724	-0.0527896	0.9579	1	DOWN	No	No
ENSMUSG00000007030	Vwa7	ENSMUST00000007245	GO:0005576(extracellular region)				von Willebrand factor A domain containing 7 [Source:MGI Symbol;Acc:MGI:1306798]	0.34	0.18	-0.183446	0.757724	-0.211159	0.832764	1	DOWN	No	No
ENSMUSG00000007035	Msh5	ENSMUST00000173124;ENSMUST00000007250;ENSMUST00000174026;ENSMUST00000174603;ENSMUST00000174556;ENSMUST00000173685;ENSMUST00000165329;ENSMUST00000174741;ENSMUST00000173928;ENSMUST00000172491	GO:0006298(mismatch repair);GO:0030983(mismatched DNA binding);GO:0005524(ATP binding);GO:0005524(ATP binding)				mutS homolog 5 [Source:MGI Symbol;Acc:MGI:1329021]	0.43	0.27	-0.171187	0.757724	-0.211159	0.832764	1	DOWN	No	No
ENSMUSG00000007279	Scube2	ENSMUST00000007423;ENSMUST00000106729	GO:0005509(calcium ion binding);GO:0005515(protein binding);GO:0042802(identical protein binding);GO:0097108(hedgehog family protein binding);GO:0003413(chondrocyte differentiation involved in endochondral bone morphogenesis);GO:0045669(positive regulation of osteoblast differentiation);GO:0045778(positive regulation of ossification);GO:0045880(positive regulation of smoothened signaling pathway)…				signal peptide, CUB domain, EGF-like 2 [Source:MGI Symbol;Acc:MGI:1928765]	0.12	0.04	-0.106915	0.757724	-0.105579	0.915916	1	DOWN	No	No
ENSMUSG00000007591	Tssk4	ENSMUST00000164809	GO:0016310(phosphorylation);GO:0006468(protein phosphorylation);GO:0016301(kinase activity);GO:0005524(ATP binding);GO:0004674(protein serine/threonine kinase activity);GO:0004672(protein kinase activity);GO:0032793(positive regulation of CREB transcription factor activity);GO:0000287(magnesium ion binding)				testis-specific serine kinase 4 [Source:MGI Symbol;Acc:MGI:1918349]	0.38	0.17	-0.23816	0.757724	-0.277146	0.781668	1	DOWN	No	No
ENSMUSG00000007989	Fzd3	ENSMUST00000131309	GO:0048786(presynaptic active zone);GO:0004871(signal transducer activity);GO:0004888(transmembrane signaling receptor activity);GO:0004930(G-protein coupled receptor activity);GO:0005515(protein binding);GO:0017147(Wnt-protein binding);GO:0030165(PDZ domain binding);GO:0042813(Wnt-activated receptor activity);GO:0001736(establishment of planar polarity);GO:0001764(neuron migration);GO:0001843(ne…	04310(Wnt signaling pathway);04390(Hippo signaling pathway);04550(Signaling pathways regulating pluripotency of stem cells);04916(Melanogenesis);05166(HTLV-I infection);05200(Pathways in cancer);05205(Proteoglycans in cancer);05206(MicroRNAs in cancer);05217(Basal cell carcinoma)			frizzled class receptor 3 [Source:MGI Symbol;Acc:MGI:108476]	0	0	0	0.757724	0				No	No
ENSMUSG00000008028	1700008O03Rik	ENSMUST00000107933;ENSMUST00000137946;ENSMUST00000134535	GO:0005575(cellular_component);GO:0008150(biological_process);GO:0003674(molecular_function);GO:0003674(molecular_function)				RIKEN cDNA 1700008O03 gene [Source:MGI Symbol;Acc:MGI:1916599]	0.02	0.03	0.0140752	0.757724	0.0131974	0.98947	1	UP	No	No
ENSMUSG00000008129	4930432K21Rik	ENSMUST00000143833;ENSMUST00000118856					RIKEN cDNA 4930432K21 gene [Source:MGI Symbol;Acc:MGI:1921916]	0.1	0.04	-0.08092	0.757724	-0.0791845	0.936886	1	DOWN	No	No
ENSMUSG00000008193	Spib	ENSMUST00000035323;ENSMUST00000098483	GO:0000980(RNA polymerase II distal enhancer sequence-specific DNA binding);GO:0000981(RNA polymerase II transcription factor activity, sequence-specific DNA binding);GO:0001205(transcriptional activator activity, RNA polymerase II distal enhancer sequence-specific binding);GO:0003677(DNA binding);GO:0003700(transcription factor activity, sequence-specific DNA binding);GO:0043565(sequence-specifi…				Spi-B transcription factor (Spi-1/PU.1 related) [Source:MGI Symbol;Acc:MGI:892986]	0.11	0.22	0.136321	0.757724	0.145172	0.884575	1	UP	No	No
ENSMUSG00000008438	Adam21	ENSMUST00000008582	GO:0004222(metalloendopeptidase activity);GO:0008233(peptidase activity);GO:0008237(metallopeptidase activity);GO:0016787(hydrolase activity);GO:0046872(metal ion binding);GO:0006508(proteolysis);GO:0016020(membrane);GO:0016021(integral component of membrane);GO:0030424(axon);GO:0043005(neuron projection);GO:0043025(neuronal cell body)				a disintegrin and metallopeptidase domain 21 [Source:MGI Symbol;Acc:MGI:1861229]	0.06	0.02	-0.0554951	0.757724	-0.0527896	0.9579	1	DOWN	No	No
ENSMUSG00000008482	Rnf151	ENSMUST00000008626	GO:0004842(ubiquitin-protein transferase activity);GO:0008270(zinc ion binding);GO:0046872(metal ion binding);GO:0007283(spermatogenesis);GO:0016567(protein ubiquitination);GO:0030154(cell differentiation);GO:0005634(nucleus);GO:0005737(cytoplasm)		K13452	EC:6.3.2.-	ring finger protein 151 [Source:MGI Symbol;Acc:MGI:1914754]	0	0.03	0.0426443	0.757724	0.0395922	0.968418	1	UP	No	No
ENSMUSG00000008496	Pou2f2	ENSMUST00000108415;ENSMUST00000175774;ENSMUST00000098679;ENSMUST00000108418;ENSMUST00000108416;ENSMUST00000108417;ENSMUST00000176408;ENSMUST00000147146	GO:0000978(RNA polymerase II core promoter proximal region sequence-specific DNA binding);GO:0001077(transcriptional activator activity, RNA polymerase II core promoter proximal region sequence-specific binding);GO:0003677(DNA binding);GO:0003700(transcription factor activity, sequence-specific DNA binding);GO:0019904(protein domain specific binding);GO:0043565(sequence-specific DNA binding);GO:0…				POU domain, class 2, transcription factor 2 [Source:MGI Symbol;Acc:MGI:101897]	0.48	0.24	-0.255257	0.757724	-0.316738	0.751443	1	DOWN	No	No
ENSMUSG00000008843	Cldn13	ENSMUST00000008987	GO:0005198(structural molecule activity);GO:0005886(plasma membrane);GO:0005923(bicellular tight junction);GO:0016020(membrane);GO:0016021(integral component of membrane);GO:0030054(cell junction);GO:0016328(lateral plasma membrane)	04514(Cell adhesion molecules (CAMs));04530(Tight junction);04670(Leukocyte transendothelial migration);05160(Hepatitis C)			claudin 13 [Source:MGI Symbol;Acc:MGI:1913102]	0	0	0	0.757724	0				No	No
ENSMUSG00000008932	Slc1a7	ENSMUST00000106713	GO:0015293(symporter activity);GO:0006810(transport);GO:0055085(transmembrane transport);GO:0016020(membrane);GO:0016021(integral component of membrane)	04724(Glutamatergic synapse)			solute carrier family 1 (glutamate transporter), member 7 [Source:MGI Symbol;Acc:MGI:2444087]	0.05	0.01	-0.056034	0.757724	-0.0527896	0.9579	1	DOWN	No	No
ENSMUSG00000008999	Bmp7	ENSMUST00000009143;ENSMUST00000137247	GO:0005125(cytokine activity);GO:0005160(transforming growth factor beta receptor binding);GO:0005515(protein binding);GO:0008083(growth factor activity);GO:0008201(heparin binding);GO:0070700(BMP receptor binding);GO:0001503(ossification);GO:0001654(eye development);GO:0001656(metanephros development);GO:0001657(ureteric bud development);GO:0001707(mesoderm formation);GO:0001822(kidney developme…	04060(Cytokine-cytokine receptor interaction);04350(TGF-beta signaling pathway);04390(Hippo signaling pathway);04390(Hippo signaling pathway)			bone morphogenetic protein 7 [Source:MGI Symbol;Acc:MGI:103302]	0.04	0.13	0.119739	0.757724	0.118777	0.905452	1	UP	No	No
ENSMUSG00000009092	Derl3	ENSMUST00000009236;ENSMUST00000218718;ENSMUST00000220190	GO:0018279(protein N-linked glycosylation via asparagine);GO:0030433(ER-associated ubiquitin-dependent protein catabolic process);GO:0030968(endoplasmic reticulum unfolded protein response);GO:1904153(negative regulation of retrograde protein transport, ER to cytosol);GO:0005783(endoplasmic reticulum);GO:0005789(endoplasmic reticulum membrane);GO:0016020(membrane);GO:0016021(integral component of…	04141(Protein processing in endoplasmic reticulum);04141(Protein processing in endoplasmic reticulum)			Der1-like domain family, member 3 [Source:MGI Symbol;Acc:MGI:1917627]	0.1	0.1	0	0.757724	0	1	1		No	No
ENSMUSG00000009093	Gstt4	ENSMUST00000160211	GO:0004364(glutathione transferase activity);GO:0016740(transferase activity);GO:0005737(cytoplasm)				glutathione S-transferase, theta 4 [Source:MGI Symbol;Acc:MGI:1923136]	0.12	0.24	0.146841	0.757724	0.158369	0.874166	1	UP	No	No
ENSMUSG00000009214	Tmem8c	ENSMUST00000009358	GO:0003674(molecular_function);GO:0007517(muscle organ development);GO:0007520(myoblast fusion);GO:0014905(myoblast fusion involved in skeletal muscle regeneration);GO:0043403(skeletal muscle tissue regeneration);GO:0045026(plasma membrane fusion);GO:0005886(plasma membrane);GO:0016020(membrane);GO:0016021(integral component of membrane)				transmembrane protein 8C [Source:MGI Symbol;Acc:MGI:1913389]	0	0	0	0.757724	0				No	No
ENSMUSG00000009248	Ascl2	ENSMUST00000009392	GO:0003700(transcription factor activity, sequence-specific DNA binding);GO:0000977(RNA polymerase II regulatory region sequence-specific DNA binding);GO:0000978(RNA polymerase II core promoter proximal region sequence-specific DNA binding);GO:0001078(transcriptional repressor activity, RNA polymerase II core promoter proximal region sequence-specific binding);GO:0003677(DNA binding);GO:0043565(s…				achaete-scute family bHLH transcription factor 2 [Source:MGI Symbol;Acc:MGI:96920]	0.17	0.01	-0.212153	0.757724	-0.211159	0.832764	1	DOWN	No	No
ENSMUSG00000009350	Mpo	ENSMUST00000020779;ENSMUST00000146650	GO:0004601(peroxidase activity);GO:0008201(heparin binding);GO:0016491(oxidoreductase activity);GO:0020037(heme binding);GO:0046872(metal ion binding);GO:0001878(response to yeast);GO:0002149(hypochlorous acid biosynthetic process);GO:0002679(respiratory burst involved in defense response);GO:0006952(defense response);GO:0006979(response to oxidative stress);GO:0007568(aging);GO:0009612(response …	04145(Phagosome);05202(Transcriptional misregulation in cancers);05202(Transcriptional misregulation in cancers)			myeloperoxidase [Source:MGI Symbol;Acc:MGI:97137]	0.02	0.01	-0.0142139	0.757724	-0.0131974	0.98947	1	DOWN	No	No
ENSMUSG00000009356	Lpo	ENSMUST00000103177;ENSMUST00000157004	GO:0004601(peroxidase activity);GO:0020037(heme binding);GO:0036393(thiocyanate peroxidase activity);GO:0001580(detection of chemical stimulus involved in sensory perception of bitter taste);GO:0006979(response to oxidative stress);GO:0018969(thiocyanate metabolic process);GO:0042742(defense response to bacterium);GO:0055114(oxidation-reduction process);GO:0098869(cellular oxidant detoxification)…	04970(Salivary secretion);04970(Salivary secretion)	K10788	EC:1.11.1.7	lactoperoxidase [Source:MGI Symbol;Acc:MGI:1923363]	0	0	0	0.757724	0				No	No
ENSMUSG00000009378	Slc16a12	ENSMUST00000009522	GO:0005308(creatine transmembrane transporter activity);GO:0015293(symporter activity);GO:0006810(transport);GO:0055085(transmembrane transport);GO:1902598(creatine transmembrane transport);GO:0005886(plasma membrane);GO:0005887(integral component of plasma membrane);GO:0016020(membrane);GO:0016021(integral component of membrane)				solute carrier family 16 (monocarboxylic acid transporters), member 12 [Source:MGI Symbol;Acc:MGI:2147716]	0.03	0.03	0	0.757724	0	1	1		No	No
ENSMUSG00000009394	Syn2	ENSMUST00000203768;ENSMUST00000169345;ENSMUST00000009538;ENSMUST00000204617;ENSMUST00000204726	GO:0003824(catalytic activity);GO:0005515(protein binding);GO:0005524(ATP binding);GO:0046983(protein dimerization activity);GO:0007269(neurotransmitter secretion);GO:0005886(plasma membrane);GO:0008021(synaptic vesicle);GO:0014069(postsynaptic density);GO:0030054(cell junction);GO:0030672(synaptic vesicle membrane);GO:0031201(SNARE complex);GO:0043209(myelin sheath);GO:0045202(synapse);GO:004520…				synapsin II [Source:MGI Symbol;Acc:MGI:103020]	0.02	0	-0.0285692	0.757724	-0.0263948	0.978942	1	DOWN	No	No
ENSMUSG00000009471	Myod1	ENSMUST00000072514	GO:0003677(DNA binding);GO:0000977(RNA polymerase II regulatory region sequence-specific DNA binding);GO:0000978(RNA polymerase II core promoter proximal region sequence-specific DNA binding);GO:0001047(core promoter binding);GO:0001077(transcriptional activator activity, RNA polymerase II core promoter proximal region sequence-specific binding);GO:0001228(transcriptional activator activity, RNA …				myogenic differentiation 1 [Source:MGI Symbol;Acc:MGI:97275]	0.03	0	-0.0426443	0.757724	-0.0395922	0.968418	1	DOWN	No	No
ENSMUSG00000009596	Taf7l	ENSMUST00000009740;ENSMUST00000113223	GO:0003713(transcription coactivator activity);GO:0005515(protein binding);GO:0008134(transcription factor binding);GO:0035035(histone acetyltransferase binding);GO:0044212(transcription regulatory region DNA binding);GO:0006351(transcription, DNA-templated);GO:0006355(regulation of transcription, DNA-templated);GO:0006357(regulation of transcription from RNA polymerase II promoter);GO:0006367(tr…	03022(Basal transcription factors);03022(Basal transcription factors)			TATA-box binding protein associated factor 7 like [Source:MGI Symbol;Acc:MGI:1921719]	0.03	0	-0.0426443	0.757724	-0.0395922	0.968418	1	DOWN	No	No
ENSMUSG00000009628	Tex15	ENSMUST00000009772	GO:0010569(regulation of double-strand break repair via homologous recombination);GO:0007140(male meiosis);GO:0007129(synapsis);GO:0005737(cytoplasm);GO:0005634(nucleus);GO:0005575(cellular_component);GO:0051321(meiotic cell cycle);GO:0048873(homeostasis of number of cells within a tissue);GO:0034502(protein localization to chromosome);GO:0032880(regulation of protein localization);GO:0030539(mal…				testis expressed gene 15 [Source:MGI Symbol;Acc:MGI:1934816]	0.02	0	-0.0285692	0.757724	-0.0263948	0.978942	1	DOWN	No	No
ENSMUSG00000009654	Oit3	ENSMUST00000009798;ENSMUST00000162493	GO:0005509(calcium ion binding);GO:1903118(urate homeostasis);GO:0005634(nucleus);GO:0005635(nuclear envelope);GO:0005635(nuclear envelope)				oncoprotein induced transcript 3 [Source:MGI Symbol;Acc:MGI:1201782]	0.06	0.24	0.226276	0.757724	0.237553	0.812228	1	UP	No	No
ENSMUSG00000009731	Kcnd1	ENSMUST00000009875	GO:0043025(neuronal cell body);GO:0016021(integral component of membrane);GO:0016020(membrane);GO:0008076(voltage-gated potassium channel complex);GO:0071805(potassium ion transmembrane transport);GO:0055085(transmembrane transport);GO:0051260(protein homooligomerization);GO:0034765(regulation of ion transmembrane transport);GO:0006813(potassium ion transport);GO:0006811(ion transport);GO:0006810…				potassium voltage-gated channel, Shal-related family, member 1 [Source:MGI Symbol;Acc:MGI:96671]	0.09	0.08	-0.0132968	0.757724	-0.0131974	0.98947	1	DOWN	No	No
ENSMUSG00000009941	Nxf2	ENSMUST00000143059;ENSMUST00000010085;ENSMUST00000113189	GO:0000166(nucleotide binding);GO:0003676(nucleic acid binding);GO:0003723(RNA binding);GO:0003729(mRNA binding);GO:0005515(protein binding);GO:0006405(RNA export from nucleus);GO:0006406(mRNA export from nucleus);GO:0006810(transport);GO:0016973(poly(A)+ mRNA export from nucleus);GO:0051028(mRNA transport);GO:0005622(intracellular);GO:0005634(nucleus);GO:0005635(nuclear envelope);GO:0005737(cyto…	03008(Ribosome biogenesis in eukaryotes);03013(RNA transport);03015(mRNA surveillance pathway);05164(Influenza A);05168(Herpes simplex infection);05168(Herpes simplex infection)			nuclear RNA export factor 2 [Source:MGI Symbol;Acc:MGI:1933192]	0.03	0.04	0.0139392	0.757724	0.0131974	0.98947	1	UP	No	No
ENSMUSG00000010021	Kif19a	ENSMUST00000138804;ENSMUST00000084368;ENSMUST00000134165	GO:0005874(microtubule);GO:0007018(microtubule-based movement);GO:0008017(microtubule binding);GO:0005524(ATP binding);GO:0003777(microtubule motor activity);GO:0003774(motor activity);GO:0000166(nucleotide binding);GO:0008574(ATP-dependent microtubule motor activity, plus-end-directed);GO:0060404(axonemal microtubule depolymerization);GO:0070462(plus-end specific microtubule depolymerization);GO…				kinesin family member 19A [Source:MGI Symbol;Acc:MGI:2447024]	0.13	0.18	0.0624641	0.757724	0.065987	0.947388	1	UP	No	No
ENSMUSG00000010064	Slc38a3	ENSMUST00000167868;ENSMUST00000010208;ENSMUST00000194895;ENSMUST00000193932;ENSMUST00000195739;ENSMUST00000194230;ENSMUST00000195033;ENSMUST00000193495	GO:0005290(L-histidine transmembrane transporter activity);GO:0015180(L-alanine transmembrane transporter activity);GO:0015182(L-asparagine transmembrane transporter activity);GO:0015186(L-glutamine transmembrane transporter activity);GO:0015293(symporter activity);GO:0015297(antiporter activity);GO:0006810(transport);GO:0006811(ion transport);GO:0006814(sodium ion transport);GO:0006865(amino aci…	04724(Glutamatergic synapse);04727(GABAergic synapse);04964(Proximal tubule bicarbonate reclamation);04964(Proximal tubule bicarbonate reclamation)			solute carrier family 38, member 3 [Source:MGI Symbol;Acc:MGI:1923507]	0.01	0.04	0.0422282	0.757724	0.0395922	0.968418	1	UP	No	No
ENSMUSG00000010066	Cacna2d2	ENSMUST00000168532;ENSMUST00000164988	GO:0005244(voltage-gated ion channel activity);GO:0005245(voltage-gated calcium channel activity);GO:0005262(calcium channel activity);GO:0046872(metal ion binding);GO:0006810(transport);GO:0006811(ion transport);GO:0006816(calcium ion transport);GO:0007528(neuromuscular junction development);GO:0034765(regulation of ion transmembrane transport);GO:0040014(regulation of multicellular organism gro…	04010(MAPK signaling pathway);04260(Cardiac muscle contraction);04261(Adrenergic signaling in cardiomyocytes);04921(Oxytocin signaling pathway);05410(Hypertrophic cardiomyopathy (HCM));05412(Arrhythmogenic right ventricular cardiomyopathy (ARVC));05414(Dilated cardiomyopathy (DCM));05414(Dilated cardiomyopathy (DCM))			calcium channel, voltage-dependent, alpha 2/delta subunit 2 [Source:MGI Symbol;Acc:MGI:1929813]	0.01	0.01	0	0.757724	0	1	1		No	No
ENSMUSG00000010080	Epn3	ENSMUST00000127305;ENSMUST00000142992	GO:0008289(lipid binding);GO:1990175(EH domain binding);GO:0008150(biological_process);GO:0005634(nucleus);GO:0005654(nucleoplasm);GO:0005737(cytoplasm);GO:0005905(clathrin-coated pit);GO:0005938(cell cortex);GO:0019897(extrinsic component of plasma membrane);GO:0030136(clathrin-coated vesicle);GO:0031410(cytoplasmic vesicle);GO:0043231(intracellular membrane-bounded organelle);GO:0048471(perinuc…	04144(Endocytosis);04144(Endocytosis)			epsin 3 [Source:MGI Symbol;Acc:MGI:1919139]	0.2	0.2	0	0.757724	0	1	1		No	No
ENSMUSG00000010122	Slc47a1	ENSMUST00000131723	GO:0005451(monovalent cation:proton antiporter activity);GO:0015238(drug transmembrane transporter activity);GO:0015297(antiporter activity);GO:0006810(transport);GO:0006855(drug transmembrane transport);GO:0015695(organic cation transport);GO:0015893(drug transport);GO:0055085(transmembrane transport);GO:1902600(hydrogen ion transmembrane transport);GO:0005886(plasma membrane);GO:0016020(membran…				solute carrier family 47, member 1 [Source:MGI Symbol;Acc:MGI:1914723]	0.02	0	-0.0285692	0.757724	-0.0263948	0.978942	1	DOWN	No	No
ENSMUSG00000010175	Prox1	ENSMUST00000175916	GO:0000981(RNA polymerase II transcription factor activity, sequence-specific DNA binding);GO:0001046(core promoter sequence-specific DNA binding);GO:0001078(transcriptional repressor activity, RNA polymerase II core promoter proximal region sequence-specific binding);GO:0003677(DNA binding);GO:0003700(transcription factor activity, sequence-specific DNA binding);GO:0003705(transcription factor a…				prospero homeobox 1 [Source:MGI Symbol;Acc:MGI:97772]	0.01	0.01	0	0.757724	0	1	1		No	No
ENSMUSG00000010342	Tex14	ENSMUST00000060835	GO:0000166(nucleotide binding);GO:0004672(protein kinase activity);GO:0005515(protein binding);GO:0005524(ATP binding);GO:0019901(protein kinase binding);GO:0006468(protein phosphorylation);GO:0007049(cell cycle);GO:0007067(mitotic nuclear division);GO:0007094(mitotic spindle assembly checkpoint);GO:0007140(male meiosis);GO:0008608(attachment of spindle microtubules to kinetochore);GO:0032091(neg…				testis expressed gene 14 [Source:MGI Symbol;Acc:MGI:1933227]	0.07	0.09	0.0267173	0.757724	0.0263948	0.978942	1	UP	No	No
ENSMUSG00000010760	Phlda2	ENSMUST00000010904	GO:0001890(placenta development);GO:0009887(animal organ morphogenesis);GO:0010468(regulation of gene expression);GO:0030334(regulation of cell migration);GO:0045995(regulation of embryonic development);GO:0060721(regulation of spongiotrophoblast cell proliferation);GO:0070873(regulation of glycogen metabolic process);GO:1903547(regulation of growth hormone activity);GO:0005737(cytoplasm);GO:0016…				pleckstrin homology like domain, family A, member 2 [Source:MGI Symbol;Acc:MGI:1202307]	0	0	0	0.757724	0				No	No
ENSMUSG00000011034	Slc5a1	ENSMUST00000011178	GO:0005215(transporter activity);GO:0005412(glucose:sodium symporter activity);GO:0006810(transport);GO:0015758(glucose transport);GO:0055085(transmembrane transport);GO:1904659(glucose transmembrane transport);GO:0005911(cell-cell junction);GO:0016020(membrane);GO:0016021(integral component of membrane);GO:0016324(apical plasma membrane);GO:0031526(brush border membrane);GO:0070062(extracellular…	04973(Carbohydrate digestion and absorption);04976(Bile secretion);04978(Mineral absorption)			solute carrier family 5 (sodium/glucose cotransporter), member 1 [Source:MGI Symbol;Acc:MGI:107678]	0.02	0	-0.0285692	0.757724	-0.0263948	0.978942	1	DOWN	No	No
ENSMUSG00000011171	Vipr2	ENSMUST00000011315;ENSMUST00000176433	GO:0004871(signal transducer activity);GO:0004888(transmembrane signaling receptor activity);GO:0004930(G-protein coupled receptor activity);GO:0004999(vasoactive intestinal polypeptide receptor activity);GO:0007165(signal transduction);GO:0007166(cell surface receptor signaling pathway);GO:0007186(G-protein coupled receptor signaling pathway);GO:0007190(activation of adenylate cyclase activity);…	04024(cAMP signaling pathway);04080(Neuroactive ligand-receptor interaction);04080(Neuroactive ligand-receptor interaction)			vasoactive intestinal peptide receptor 2 [Source:MGI Symbol;Acc:MGI:107166]	0.32	0.08	-0.289507	0.757724	-0.316738	0.751443	1	DOWN	No	No
ENSMUSG00000011305	Plin5	ENSMUST00000019808;ENSMUST00000113072	GO:0005811(lipid particle);GO:0005515(protein binding);GO:0035473(lipase binding);GO:0042802(identical protein binding);GO:0006629(lipid metabolic process);GO:0010867(positive regulation of triglyceride biosynthetic process);GO:0010884(positive regulation of lipid storage);GO:0010890(positive regulation of sequestering of triglyceride);GO:0010897(negative regulation of triglyceride catabolic proc…				perilipin 5 [Source:MGI Symbol;Acc:MGI:1914218]	0.06	0.04	-0.0274807	0.757724	-0.0263948	0.978942	1	DOWN	No	No
ENSMUSG00000011427	Zfp790	ENSMUST00000178162;ENSMUST00000032796;ENSMUST00000207328	GO:0003674(molecular_function);GO:0003676(nucleic acid binding);GO:0046872(metal ion binding);GO:0006355(regulation of transcription, DNA-templated);GO:0008150(biological_process);GO:0005575(cellular_component);GO:0005622(intracellular);GO:0005622(intracellular)				zinc finger protein 790 [Source:MGI Symbol;Acc:MGI:1923431]	0.54	1.71	0.815363	0.757724	1.5441	0.122565	0.315386	UP	No	No
ENSMUSG00000011589	Fsd1	ENSMUST00000011733	GO:0007049(cell cycle);GO:0007067(mitotic nuclear division);GO:0051301(cell division);GO:0005622(intracellular);GO:0005634(nucleus);GO:0005737(cytoplasm);GO:0005815(microtubule organizing center);GO:0005856(cytoskeleton);GO:0005874(microtubule);GO:0032154(cleavage furrow)				fibronectin type 3 and SPRY domain-containing protein [Source:MGI Symbol;Acc:MGI:1934858]	0.03	0	-0.0426443	0.757724	-0.0395922	0.968418	1	DOWN	No	No
ENSMUSG00000012187	Mogat1	ENSMUST00000113524;ENSMUST00000012331	GO:0003846(2-acylglycerol O-acyltransferase activity);GO:0004144(diacylglycerol O-acyltransferase activity);GO:0016740(transferase activity);GO:0016746(transferase activity, transferring acyl groups);GO:0016747(transferase activity, transferring acyl groups other than amino-acyl groups);GO:0006071(glycerol metabolic process);GO:0006629(lipid metabolic process);GO:0006651(diacylglycerol biosynthet…	00561(Glycerolipid metabolism);00561(Glycerolipid metabolism)			monoacylglycerol O-acyltransferase 1 [Source:MGI Symbol;Acc:MGI:1915643]	0.04	0.05	0.0138058	0.757724	0.0131974	0.98947	1	UP	No	No
ENSMUSG00000012282	Wnt8a	ENSMUST00000012426	GO:0005102(receptor binding);GO:0005109(frizzled binding);GO:0005515(protein binding);GO:0000902(cell morphogenesis);GO:0003002(regionalization);GO:0007275(multicellular organism development);GO:0007492(endoderm development);GO:0009949(polarity specification of anterior/posterior axis);GO:0010085(polarity specification of proximal/distal axis);GO:0016055(Wnt signaling pathway);GO:0030182(neuron d…	04310(Wnt signaling pathway);04340(Hedgehog signaling pathway);04390(Hippo signaling pathway);04550(Signaling pathways regulating pluripotency of stem cells);04916(Melanogenesis);05166(HTLV-I infection);05200(Pathways in cancer);05205(Proteoglycans in cancer);05217(Basal cell carcinoma)			wingless-type MMTV integration site family, member 8A [Source:MGI Symbol;Acc:MGI:107924]	0.05	0.05	0	0.757724	0	1	1		No	No
ENSMUSG00000012350	Ehf	ENSMUST00000090475;ENSMUST00000128546	GO:0000978(RNA polymerase II core promoter proximal region sequence-specific DNA binding);GO:0000981(RNA polymerase II transcription factor activity, sequence-specific DNA binding);GO:0001077(transcriptional activator activity, RNA polymerase II core promoter proximal region sequence-specific binding);GO:0003677(DNA binding);GO:0003700(transcription factor activity, sequence-specific DNA binding)…				ets homologous factor [Source:MGI Symbol;Acc:MGI:1270840]	0.03	0	-0.0426443	0.757724	-0.0395922	0.968418	1	DOWN	No	No
ENSMUSG00000013083	2200002J24Rik	ENSMUST00000207565;ENSMUST00000013227	GO:0003674(molecular_function);GO:0008150(biological_process);GO:0009607(response to biotic stimulus);GO:0016020(membrane);GO:0016021(integral component of membrane);GO:0016021(integral component of membrane)				RIKEN cDNA 2200002J24 gene [Source:MGI Symbol;Acc:MGI:1916397]	0	0	0	0.757724	0				No	No
ENSMUSG00000013091	Tmem190	ENSMUST00000013235	GO:0043621(protein self-association);GO:0002244(hematopoietic progenitor cell differentiation);GO:0002079(inner acrosomal membrane);GO:0005634(nucleus);GO:0016020(membrane);GO:0016021(integral component of membrane)				transmembrane protein 190 [Source:MGI Symbol;Acc:MGI:1925302]	0.13	0.33	0.235103	0.757724	0.263948	0.79182	1	UP	No	No
ENSMUSG00000013353	4931406B18Rik	ENSMUST00000013497;ENSMUST00000163619	GO:0016021(integral component of membrane);GO:0016020(membrane);GO:0005575(cellular_component);GO:0008150(biological_process);GO:0003674(molecular_function);GO:0003674(molecular_function)				RIKEN cDNA 4931406B18 gene [Source:MGI Symbol;Acc:MGI:1921304]	0.01	0.01	0	0.757724	0	1	1		No	No
ENSMUSG00000013367	Iglon5	ENSMUST00000107974	GO:0003674(molecular_function);GO:0005576(extracellular region)				IgLON family member 5 [Source:MGI Symbol;Acc:MGI:2686277]	0.33	0.48	0.154171	0.757724	0.197961	0.843075	1	UP	No	No
ENSMUSG00000013415	Igf2bp1	ENSMUST00000013559;ENSMUST00000138513;ENSMUST00000141515	GO:0000166(nucleotide binding);GO:0003676(nucleic acid binding);GO:0003723(RNA binding);GO:0003729(mRNA binding);GO:0003730(mRNA 3'-UTR binding);GO:0045182(translation regulator activity);GO:0048027(mRNA 5'-UTR binding);GO:0006403(RNA localization);GO:0006417(regulation of translation);GO:0006810(transport);GO:0010610(regulation of mRNA stability involved in response to stress);GO:0017148(negativ…	05206(MicroRNAs in cancer);05206(MicroRNAs in cancer)			insulin-like growth factor 2 mRNA binding protein 1 [Source:MGI Symbol;Acc:MGI:1890357]	0.12	0.12	0	0.757724	0	1	1		No	No
ENSMUSG00000013523	Bcas1	ENSMUST00000109152;ENSMUST00000013667	GO:0042803(protein homodimerization activity);GO:0008150(biological_process);GO:0005737(cytoplasm);GO:0005829(cytosol);GO:0070062(extracellular exosome);GO:0070062(extracellular exosome)				breast carcinoma amplified sequence 1 [Source:MGI Symbol;Acc:MGI:1924210]	0.03	0.15	0.15899	0.757724	0.158369	0.874166	1	UP	No	No
ENSMUSG00000013766	Ly6g6e	ENSMUST00000013910	GO:0005886(plasma membrane);GO:2000273(positive regulation of receptor activity);GO:0095500(acetylcholine receptor signaling pathway);GO:0002029(desensitization of G-protein coupled receptor protein signaling pathway);GO:0033130(acetylcholine receptor binding);GO:0030549(acetylcholine receptor activator activity);GO:0004675(transmembrane receptor protein serine/threonine kinase activity);GO:00071…				lymphocyte antigen 6 complex, locus G6E [Source:MGI Symbol;Acc:MGI:1917524]	0	0.05	0.0703893	0.757724	0.065987	0.947388	1	UP	No	No
ENSMUSG00000013936	Myl2	ENSMUST00000111751	GO:0015629(actin cytoskeleton);GO:0003785(actin monomer binding);GO:0005509(calcium ion binding);GO:0046872(metal ion binding);GO:0003007(heart morphogenesis);GO:0007507(heart development);GO:0009791(post-embryonic development);GO:0030308(negative regulation of cell growth);GO:0042694(muscle cell fate specification);GO:0048747(muscle fiber development);GO:0055003(cardiac myofibril assembly);GO:00…	04260(Cardiac muscle contraction);04261(Adrenergic signaling in cardiomyocytes);04510(Focal adhesion);04530(Tight junction);04670(Leukocyte transendothelial migration);04810(Regulation of actin cytoskeleton);05410(Hypertrophic cardiomyopathy (HCM));05414(Dilated cardiomyopathy (DCM))			myosin, light polypeptide 2, regulatory, cardiac, slow [Source:MGI Symbol;Acc:MGI:97272]	0	0.1	0.137504	0.757724	0.131974	0.895005	1	UP	No	No
ENSMUSG00000014453	Blk	ENSMUST00000014597	GO:0000166(nucleotide binding);GO:0004672(protein kinase activity);GO:0004713(protein tyrosine kinase activity);GO:0004715(non-membrane spanning protein tyrosine kinase activity);GO:0005102(receptor binding);GO:0005515(protein binding);GO:0005524(ATP binding);GO:0016301(kinase activity);GO:0016740(transferase activity);GO:0006468(protein phosphorylation);GO:0007169(transmembrane receptor protein …				B lymphoid kinase [Source:MGI Symbol;Acc:MGI:88169]	0	0.05	0.0703893	0.757724	0.065987	0.947388	1	UP	No	No
ENSMUSG00000014543	Klra17	ENSMUST00000014687	GO:0030246(carbohydrate binding);GO:0042288(MHC class I protein binding);GO:0016020(membrane);GO:0016021(integral component of membrane)				killer cell lectin-like receptor, subfamily A, member 17 [Source:MGI Symbol;Acc:MGI:2180674]	0.23	0	-0.298658	0.757724	-0.30354	0.761478	1	DOWN	No	No
ENSMUSG00000014602	Kif1a	ENSMUST00000171796;ENSMUST00000190723	GO:0007018(microtubule-based movement);GO:0008017(microtubule binding);GO:0005524(ATP binding);GO:0003777(microtubule motor activity);GO:0003774(motor activity);GO:0000166(nucleotide binding);GO:0030424(axon);GO:0030424(axon)				kinesin family member 1A [Source:MGI Symbol;Acc:MGI:108391]	0.05	0.03	-0.027745	0.757724	-0.0263948	0.978942	1	DOWN	No	No
ENSMUSG00000014686	Ceacam16	ENSMUST00000014830	GO:0032426(stereocilium tip);GO:0005615(extracellular space);GO:0005576(extracellular region);GO:0007605(sensory perception of sound);GO:0042802(identical protein binding);GO:0005515(protein binding)				carcinoembryonic antigen-related cell adhesion molecule 16 [Source:MGI Symbol;Acc:MGI:2685615]	0.44	0.43	-0.0100537	0.757724	-0.0131974	0.98947	1	DOWN	No	No
ENSMUSG00000015090	Ptgds	ENSMUST00000114259;ENSMUST00000015234;ENSMUST00000114251;ENSMUST00000144016;ENSMUST00000137417	GO:0004667(prostaglandin-D synthase activity);GO:0005215(transporter activity);GO:0005501(retinoid binding);GO:0005504(fatty acid binding);GO:0016853(isomerase activity);GO:0036094(small molecule binding);GO:0001516(prostaglandin biosynthetic process);GO:0006629(lipid metabolic process);GO:0006631(fatty acid metabolic process);GO:0006633(fatty acid biosynthetic process);GO:0006693(prostaglandin m…	00590(Arachidonic acid metabolism);00590(Arachidonic acid metabolism)			prostaglandin D2 synthase (brain) [Source:MGI Symbol;Acc:MGI:99261]	0.11	0.25	0.171368	0.757724	0.184764	0.853414	1	UP	No	No
ENSMUSG00000015202	Cnksr3	ENSMUST00000150282;ENSMUST00000015346	GO:0003674(molecular_function);GO:0009966(regulation of signal transduction);GO:0010765(positive regulation of sodium ion transport);GO:0033137(negative regulation of peptidyl-serine phosphorylation);GO:0070373(negative regulation of ERK1 and ERK2 cascade);GO:2000651(positive regulation of sodium ion transmembrane transporter activity);GO:0005575(cellular_component);GO:0005737(cytoplasm);GO:00160…				Cnksr family member 3 [Source:MGI Symbol;Acc:MGI:2674130]	0.49	0.29	-0.207941	0.757724	-0.263948	0.79182	1	DOWN	No	No
ENSMUSG00000015224	Cyp2j9	ENSMUST00000055693;ENSMUST00000126509	GO:0004497(monooxygenase activity);GO:0005506(iron ion binding);GO:0016491(oxidoreductase activity);GO:0016705(oxidoreductase activity, acting on paired donors, with incorporation or reduction of molecular oxygen);GO:0016712(oxidoreductase activity, acting on paired donors, with incorporation or reduction of molecular oxygen, reduced flavin or flavoprotein as one donor, and incorporation of one a…	00590(Arachidonic acid metabolism);00591(Linoleic acid metabolism);04726(Serotonergic synapse);04750(Inflammatory mediator regulation of TRP channels);04913(Ovarian Steroidogenesis);04913(Ovarian Steroidogenesis)	K17712	EC:1.14.14.1	cytochrome P450, family 2, subfamily j, polypeptide 9 [Source:MGI Symbol;Acc:MGI:1921769]	0.03	0	-0.0426443	0.757724	-0.0395922	0.968418	1	DOWN	No	No
ENSMUSG00000015314	Slamf6	ENSMUST00000195656;ENSMUST00000171330;ENSMUST00000194924;ENSMUST00000194561;ENSMUST00000194182;ENSMUST00000193311	GO:0016020(membrane);GO:0016021(integral component of membrane);GO:0001779(natural killer cell differentiation);GO:0001787(natural killer cell proliferation);GO:0002250(adaptive immune response);GO:0002376(immune system process);GO:0032729(positive regulation of interferon-gamma production);GO:0032740(positive regulation of interleukin-17 production);GO:0045087(innate immune response);GO:0045954(…				SLAM family member 6 [Source:MGI Symbol;Acc:MGI:1353620]	0.24	0.23	-0.0116818	0.757724	-0.0131974	0.98947	1	DOWN	No	No
ENSMUSG00000015316	Slamf1	ENSMUST00000015460;ENSMUST00000163992	GO:0004872(receptor activity);GO:0002277(myeloid dendritic cell activation involved in immune response);GO:0032695(negative regulation of interleukin-12 production);GO:0032715(negative regulation of interleukin-6 production);GO:0032720(negative regulation of tumor necrosis factor production);GO:0046330(positive regulation of JNK cascade);GO:0046649(lymphocyte activation);GO:0070374(positive regul…	05162(Measles);05162(Measles)			signaling lymphocytic activation molecule family member 1 [Source:MGI Symbol;Acc:MGI:1351314]	0.11	0.03	-0.107915	0.757724	-0.105579	0.915916	1	DOWN	No	No
ENSMUSG00000015342	Xk	ENSMUST00000015486	GO:0005623(cell);GO:0016020(membrane);GO:0016021(integral component of membrane);GO:0006810(transport);GO:0006865(amino acid transport);GO:0006874(cellular calcium ion homeostasis);GO:0008361(regulation of cell size);GO:0010961(cellular magnesium ion homeostasis);GO:0031133(regulation of axon diameter);GO:0042552(myelination);GO:0048741(skeletal muscle fiber development)				X-linked Kx blood group [Source:MGI Symbol;Acc:MGI:103569]	0.07	0.02	-0.0690416	0.757724	-0.065987	0.947388	1	DOWN	No	No
ENSMUSG00000015533	Itga2	ENSMUST00000056117	GO:0005178(integrin binding);GO:0005518(collagen binding);GO:0032403(protein complex binding);GO:0038064(collagen receptor activity);GO:0043236(laminin binding);GO:0046872(metal ion binding);GO:0046982(protein heterodimerization activity);GO:0098639(collagen binding involved in cell-matrix adhesion);GO:0001666(response to hypoxia);GO:0002687(positive regulation of leukocyte migration);GO:0006929(…	04145(Phagosome);04151(PI3K-Akt signaling pathway);04510(Focal adhesion);04512(ECM-receptor interaction);04611(Platelet activation);04640(Hematopoietic cell lineage);04810(Regulation of actin cytoskeleton);05200(Pathways in cancer);05205(Proteoglycans in cancer);05222(Small cell lung cancer);05410(Hypertrophic cardiomyopathy (HCM));05412(Arrhythmogenic right ventricular cardiomyopathy (ARVC));054…			integrin alpha 2 [Source:MGI Symbol;Acc:MGI:96600]	0.16	0.26	0.119299	0.757724	0.131974	0.895005	1	UP	No	No
ENSMUSG00000015709	Arnt2	ENSMUST00000085077;ENSMUST00000209133;ENSMUST00000207459;ENSMUST00000208204	GO:0000978(RNA polymerase II core promoter proximal region sequence-specific DNA binding);GO:0000981(RNA polymerase II transcription factor activity, sequence-specific DNA binding);GO:0001077(transcriptional activator activity, RNA polymerase II core promoter proximal region sequence-specific binding);GO:0003677(DNA binding);GO:0003700(transcription factor activity, sequence-specific DNA binding)…	05200(Pathways in cancer);05202(Transcriptional misregulation in cancers);05211(Renal cell carcinoma);05211(Renal cell carcinoma)			aryl hydrocarbon receptor nuclear translocator 2 [Source:MGI Symbol;Acc:MGI:107188]	0.03	0.01	-0.028289	0.757724	-0.0263948	0.978942	1	DOWN	No	No
ENSMUSG00000015829	Tnr	ENSMUST00000192069;ENSMUST00000195199;ENSMUST00000193325	GO:0046625(sphingolipid binding);GO:0007155(cell adhesion);GO:0007158(neuron cell-cell adhesion);GO:0008306(associative learning);GO:0010977(negative regulation of neuron projection development);GO:0022029(telencephalon cell migration);GO:0022408(negative regulation of cell-cell adhesion);GO:0030198(extracellular matrix organization);GO:0030517(negative regulation of axon extension);GO:0035641(lo…	04151(PI3K-Akt signaling pathway);04510(Focal adhesion);04512(ECM-receptor interaction);05206(MicroRNAs in cancer);05206(MicroRNAs in cancer)			tenascin R [Source:MGI Symbol;Acc:MGI:99516]	0.28	0.12	-0.192645	0.757724	-0.211159	0.832764	1	DOWN	No	No
ENSMUSG00000015879	Fam184b	ENSMUST00000198680;ENSMUST00000016023	GO:0003674(molecular_function);GO:0008150(biological_process);GO:0005575(cellular_component);GO:0005575(cellular_component)				family with sequence similarity 184, member B [Source:MGI Symbol;Acc:MGI:2442958]	0.02	0.02	0	0.757724	0	1	1		No	No
ENSMUSG00000015890	Amdhd1	ENSMUST00000016034	GO:0016787(hydrolase activity);GO:0016810(hydrolase activity, acting on carbon-nitrogen (but not peptide) bonds);GO:0016812(hydrolase activity, acting on carbon-nitrogen (but not peptide) bonds, in cyclic amides);GO:0046872(metal ion binding);GO:0050480(imidazolonepropionase activity);GO:0006547(histidine metabolic process);GO:0019556(histidine catabolic process to glutamate and formamide);GO:001…	00340(Histidine metabolism)	K01468	EC:3.5.2.7	amidohydrolase domain containing 1 [Source:MGI Symbol;Acc:MGI:1919011]	1.3	1.42	0.0733732	0.757724	0.158369	0.874166	1	UP	No	No
ENSMUSG00000015957	Wnt11	ENSMUST00000165122;ENSMUST00000163913;ENSMUST00000067495;ENSMUST00000167303;ENSMUST00000208062	GO:0005578(proteinaceous extracellular matrix);GO:0005576(extracellular region);GO:0016055(Wnt signaling pathway);GO:0007275(multicellular organism development);GO:0005102(receptor binding);GO:0005096(GTPase activator activity);GO:0005109(frizzled binding);GO:0005515(protein binding);GO:0030295(protein kinase activator activity);GO:0044212(transcription regulatory region DNA binding);GO:0001649(o…	04310(Wnt signaling pathway);04340(Hedgehog signaling pathway);04390(Hippo signaling pathway);04550(Signaling pathways regulating pluripotency of stem cells);04916(Melanogenesis);05166(HTLV-I infection);05200(Pathways in cancer);05205(Proteoglycans in cancer);05217(Basal cell carcinoma);05217(Basal cell carcinoma)			wingless-type MMTV integration site family, member 11 [Source:MGI Symbol;Acc:MGI:101948]	0.08	0.22	0.17585	0.757724	0.184764	0.853414	1	UP	No	No
ENSMUSG00000015962	1700016C15Rik	ENSMUST00000016106	GO:0003674(molecular_function);GO:0008150(biological_process);GO:0005575(cellular_component)				RIKEN cDNA 1700016C15 gene [Source:MGI Symbol;Acc:MGI:1916678]	0.41	0.19	-0.244734	0.757724	-0.290343	0.771554	1	DOWN	No	No
ENSMUSG00000015966	Il17rb	ENSMUST00000135888;ENSMUST00000136726	GO:0016021(integral component of membrane);GO:0016020(membrane);GO:0004896(cytokine receptor activity);GO:0030368(interleukin-17 receptor activity);GO:0019221(cytokine-mediated signaling pathway);GO:0050729(positive regulation of inflammatory response);GO:2000664(positive regulation of interleukin-5 secretion);GO:2000667(positive regulation of interleukin-13 secretion);GO:0005576(extracellular re…	04060(Cytokine-cytokine receptor interaction);04060(Cytokine-cytokine receptor interaction)			interleukin 17 receptor B [Source:MGI Symbol;Acc:MGI:1355292]	0.07	0.04	-0.0410273	0.757724	-0.0395922	0.968418	1	DOWN	No	No
ENSMUSG00000015980	Lrrc27	ENSMUST00000016124;ENSMUST00000156768;ENSMUST00000106104;ENSMUST00000135509;ENSMUST00000126199;ENSMUST00000130248;ENSMUST00000126213;ENSMUST00000142176	GO:0003674(molecular_function);GO:0007165(signal transduction);GO:0005886(plasma membrane);GO:0005886(plasma membrane)				leucine rich repeat containing 27 [Source:MGI Symbol;Acc:MGI:1923862]	0.58	0.83	0.211919	0.757724	0.329935	0.741449	1	UP	No	No
ENSMUSG00000015981	Stk32c	ENSMUST00000016125;ENSMUST00000165870	GO:0000166(nucleotide binding);GO:0004672(protein kinase activity);GO:0004674(protein serine/threonine kinase activity);GO:0005524(ATP binding);GO:0016301(kinase activity);GO:0016740(transferase activity);GO:0046872(metal ion binding);GO:0006468(protein phosphorylation);GO:0016310(phosphorylation);GO:0018105(peptidyl-serine phosphorylation);GO:0035556(intracellular signal transduction);GO:0005622…				serine/threonine kinase 32C [Source:MGI Symbol;Acc:MGI:2385336]	0.28	0.19	-0.105182	0.757724	-0.118777	0.905452	1	DOWN	No	No
ENSMUSG00000016028	Celsr1	ENSMUST00000016172	GO:0004871(signal transducer activity);GO:0004888(transmembrane signaling receptor activity);GO:0004930(G-protein coupled receptor activity);GO:0005509(calcium ion binding);GO:0005515(protein binding);GO:0046983(protein dimerization activity);GO:0001702(gastrulation with mouth forming second);GO:0001736(establishment of planar polarity);GO:0001764(neuron migration);GO:0001843(neural tube closure)…				cadherin, EGF LAG seven-pass G-type receptor 1 [Source:MGI Symbol;Acc:MGI:1100883]	0.08	0.05	-0.040642	0.757724	-0.0395922	0.968418	1	DOWN	No	No
ENSMUSG00000016255	Tubb1	ENSMUST00000016399	GO:0070062(extracellular exosome);GO:0015630(microtubule cytoskeleton);GO:0005874(microtubule);GO:0005856(cytoskeleton);GO:0005737(cytoplasm);GO:0051225(spindle assembly);GO:0007017(microtubule-based process);GO:0005525(GTP binding);GO:0005200(structural constituent of cytoskeleton);GO:0003924(GTPase activity);GO:0000166(nucleotide binding)	04145(Phagosome);04540(Gap junction)			tubulin, beta 1 class VI [Source:MGI Symbol;Acc:MGI:107814]	0.04	0.06	0.0274807	0.757724	0.0263948	0.978942	1	UP	No	No
ENSMUSG00000016283	H2-M2	ENSMUST00000016427	GO:0009986(cell surface);GO:0005102(receptor binding);GO:0042605(peptide antigen binding);GO:0002474(antigen processing and presentation of peptide antigen via MHC class I);GO:0005886(plasma membrane);GO:0016020(membrane);GO:0016021(integral component of membrane)	04144(Endocytosis);04145(Phagosome);04514(Cell adhesion molecules (CAMs));04612(Antigen processing and presentation);04650(Natural killer cell mediated cytotoxicity);04940(Type I diabetes mellitus);05166(HTLV-I infection);05168(Herpes simplex infection);05169(Epstein-Barr virus infection);05203(Viral carcinogenesis);05320(Autoimmune thyroid disease);05330(Allograft rejection);05332(Graft-versus-h…			histocompatibility 2, M region locus 2 [Source:MGI Symbol;Acc:MGI:95914]	0.1	0.06	-0.0534393	0.757724	-0.0527896	0.9579	1	DOWN	No	No
ENSMUSG00000016327	Atp1b4	ENSMUST00000016471	GO:0005515(protein binding);GO:0006351(transcription, DNA-templated);GO:0006355(regulation of transcription, DNA-templated);GO:0005634(nucleus);GO:0005635(nuclear envelope);GO:0005637(nuclear inner membrane);GO:0005890(sodium:potassium-exchanging ATPase complex);GO:0016020(membrane);GO:0016021(integral component of membrane);GO:0006814(sodium ion transport);GO:0006813(potassium ion transport);GO:…	04022(cGMP - PKG signaling pathway);04024(cAMP signaling pathway);04260(Cardiac muscle contraction);04261(Adrenergic signaling in cardiomyocytes);04911(Insulin secretion);04918(Thyroid hormone synthesis);04919(Thyroid hormone signaling pathway);04960(Aldosterone-regulated sodium reabsorption);04961(Endocrine and other factor-regulated calcium reabsorption);04964(Proximal tubule bicarbonate reclam…			ATPase, (Na+)/K+ transporting, beta 4 polypeptide [Source:MGI Symbol;Acc:MGI:1915071]	0.01	0	-0.0143553	0.757724	-0.0131974	0.98947	1	DOWN	No	No
ENSMUSG00000016346	Kcnq2	ENSMUST00000149964;ENSMUST00000197015;ENSMUST00000049792;ENSMUST00000129695;ENSMUST00000103049;ENSMUST00000145861;ENSMUST00000144592;ENSMUST00000139458;ENSMUST00000129361;ENSMUST00000140789	GO:0016021(integral component of membrane);GO:0016020(membrane);GO:0008076(voltage-gated potassium channel complex);GO:0071805(potassium ion transmembrane transport);GO:0055085(transmembrane transport);GO:0006813(potassium ion transport);GO:0006811(ion transport);GO:0006810(transport);GO:0030506(ankyrin binding);GO:0005267(potassium channel activity);GO:0005249(voltage-gated potassium channel act…	04725(Cholinergic synapse);04725(Cholinergic synapse)			potassium voltage-gated channel, subfamily Q, member 2 [Source:MGI Symbol;Acc:MGI:1309503]	0.3	0.42	0.127379	0.757724	0.158369	0.874166	1	UP	No	No
ENSMUSG00000016386	Mpped2	ENSMUST00000111063	GO:0016787(hydrolase activity);GO:0046872(metal ion binding);GO:0008150(biological_process);GO:0005575(cellular_component)				metallophosphoesterase domain containing 2 [Source:MGI Symbol;Acc:MGI:1924265]	0.02	0	-0.0285692	0.757724	-0.0263948	0.978942	1	DOWN	No	No
ENSMUSG00000016524	Il19	ENSMUST00000187410	GO:0016020(membrane);GO:0016021(integral component of membrane);GO:0005125(cytokine activity);GO:0006915(apoptotic process);GO:0042226(interleukin-6 biosynthetic process);GO:0072593(reactive oxygen species metabolic process);GO:2001235(positive regulation of apoptotic signaling pathway);GO:2001237(negative regulation of extrinsic apoptotic signaling pathway);GO:2001244(positive regulation of intr…	04060(Cytokine-cytokine receptor interaction);04630(Jak-STAT signaling pathway)			interleukin 19 [Source:MGI Symbol;Acc:MGI:1890472]	0	0.08	0.111031	0.757724	0.105579	0.915916	1	UP	No	No
ENSMUSG00000016552	Foxred2	ENSMUST00000016696;ENSMUST00000140096;ENSMUST00000129045	GO:0001948(glycoprotein binding);GO:0016491(oxidoreductase activity);GO:0050660(flavin adenine dinucleotide binding);GO:0030433(ER-associated ubiquitin-dependent protein catabolic process);GO:0055114(oxidation-reduction process);GO:0005783(endoplasmic reticulum);GO:0005788(endoplasmic reticulum lumen);GO:0005788(endoplasmic reticulum lumen)				FAD-dependent oxidoreductase domain containing 2 [Source:MGI Symbol;Acc:MGI:106315]	0.35	0.24	-0.122619	0.757724	-0.145172	0.884575	1	DOWN	No	No
ENSMUSG00000016763	Scube1	ENSMUST00000171496	GO:0005509(calcium ion binding);GO:0042802(identical protein binding);GO:0046982(protein heterodimerization activity);GO:0030154(cell differentiation);GO:0045880(positive regulation of smoothened signaling pathway);GO:0051260(protein homooligomerization);GO:0005576(extracellular region);GO:0005615(extracellular space);GO:0005886(plasma membrane);GO:0009897(external side of plasma membrane);GO:000…				signal peptide, CUB domain, EGF-like 1 [Source:MGI Symbol;Acc:MGI:1890616]	0	0	0	0.757724	0				No	No
ENSMUSG00000016942	Tmprss6	ENSMUST00000017086	GO:0004252(serine-type endopeptidase activity);GO:0008233(peptidase activity);GO:0008236(serine-type peptidase activity);GO:0016787(hydrolase activity);GO:0000122(negative regulation of transcription from RNA polymerase II promoter);GO:0006508(proteolysis);GO:0006879(cellular iron ion homeostasis);GO:0030514(negative regulation of BMP signaling pathway);GO:0033619(membrane protein proteolysis);GO…				transmembrane serine protease 6 [Source:MGI Symbol;Acc:MGI:1919003]	0.07	0.07	0	0.757724	0	1	1		No	No
ENSMUSG00000017204	Gsdma	ENSMUST00000017348	GO:0003674(molecular_function);GO:0006915(apoptotic process);GO:0012501(programmed cell death);GO:0005737(cytoplasm);GO:0005829(cytosol);GO:0005886(plasma membrane);GO:0016020(membrane);GO:0048471(perinuclear region of cytoplasm)				gasdermin A [Source:MGI Symbol;Acc:MGI:1889509]	0	0.01	0.0143553	0.757724	0.0131974	0.98947	1	UP	No	No
ENSMUSG00000017314	Mpp2	ENSMUST00000017458;ENSMUST00000147126;ENSMUST00000130903	GO:0005515(protein binding);GO:0030165(PDZ domain binding);GO:0044325(ion channel binding);GO:0051260(protein homooligomerization);GO:0060079(excitatory postsynaptic potential);GO:0060291(long-term synaptic potentiation);GO:0005856(cytoskeleton);GO:0014069(postsynaptic density);GO:0032590(dendrite membrane);GO:0043197(dendritic spine);GO:0043198(dendritic shaft);GO:0043198(dendritic shaft)		K00942	EC:2.7.4.8	membrane protein, palmitoylated 2 (MAGUK p55 subfamily member 2) [Source:MGI Symbol;Acc:MGI:1858257]	0.22	0.14	-0.0978473	0.757724	-0.105579	0.915916	1	DOWN	No	No
ENSMUSG00000017400	Stac2	ENSMUST00000017544;ENSMUST00000131519	GO:0003674(molecular_function);GO:0046872(metal ion binding);GO:0008150(biological_process);GO:0035556(intracellular signal transduction);GO:0005575(cellular_component);GO:0005622(intracellular);GO:0005622(intracellular)				SH3 and cysteine rich domain 2 [Source:MGI Symbol;Acc:MGI:2144518]	0.11	0.2	0.112475	0.757724	0.118777	0.905452	1	UP	No	No
ENSMUSG00000017491	Rarb	ENSMUST00000063750	GO:0000977(RNA polymerase II regulatory region sequence-specific DNA binding);GO:0003677(DNA binding);GO:0003700(transcription factor activity, sequence-specific DNA binding);GO:0003707(steroid hormone receptor activity);GO:0003708(retinoic acid receptor activity);GO:0008144(drug binding);GO:0008270(zinc ion binding);GO:0032403(protein complex binding);GO:0043565(sequence-specific DNA binding);GO…	05200(Pathways in cancer);05222(Small cell lung cancer);05223(Non-small cell lung cancer)			retinoic acid receptor, beta [Source:MGI Symbol;Acc:MGI:97857]	0.18	0.01	-0.224432	0.757724	-0.224356	0.82248	1	DOWN	No	No
ENSMUSG00000017607	Tns4	ENSMUST00000017751;ENSMUST00000107465;ENSMUST00000153351	GO:0003674(molecular_function);GO:0003779(actin binding);GO:0006915(apoptotic process);GO:0008104(protein localization);GO:0005737(cytoplasm);GO:0005856(cytoskeleton);GO:0005925(focal adhesion);GO:0030054(cell junction);GO:0030054(cell junction)				tensin 4 [Source:MGI Symbol;Acc:MGI:2144377]	0.33	0.42	0.0944647	0.757724	0.118777	0.905452	1	UP	No	No
ENSMUSG00000017639	Rab11fip4	ENSMUST00000017783;ENSMUST00000155381	GO:0005509(calcium ion binding);GO:0017137(Rab GTPase binding);GO:0030306(ADP-ribosylation factor binding);GO:0042803(protein homodimerization activity);GO:0046872(metal ion binding);GO:0000910(cytokinesis);GO:0003407(neural retina development);GO:0006810(transport);GO:0007049(cell cycle);GO:0051301(cell division);GO:1903452(positive regulation of G1 to G0 transition);GO:0005615(extracellular spa…	04144(Endocytosis);04144(Endocytosis)			RAB11 family interacting protein 4 (class II) [Source:MGI Symbol;Acc:MGI:2442920]	0.13	0.22	0.110558	0.757724	0.118777	0.905452	1	UP	No	No
ENSMUSG00000017713	Tha1	ENSMUST00000033230;ENSMUST00000153989;ENSMUST00000138354	GO:0003824(catalytic activity);GO:0008732(L-allo-threonine aldolase activity);GO:0016829(lyase activity);GO:0006520(cellular amino acid metabolic process);GO:0006545(glycine biosynthetic process);GO:0006567(threonine catabolic process);GO:0005829(cytosol);GO:0005829(cytosol)	00260(Glycine, serine and threonine metabolism);01230(Biosynthesis of amino acids);01230(Biosynthesis of amino acids)			threonine aldolase 1 [Source:MGI Symbol;Acc:MGI:1919026]	1.77	1.76	-0.00521771	0.757724	-0.0131974	0.98947	1	DOWN	No	No
ENSMUSG00000017868	Sgk2	ENSMUST00000018012;ENSMUST00000117123;ENSMUST00000139053	GO:0000166(nucleotide binding);GO:0004672(protein kinase activity);GO:0004674(protein serine/threonine kinase activity);GO:0005246(calcium channel regulator activity);GO:0005524(ATP binding);GO:0015459(potassium channel regulator activity);GO:0016301(kinase activity);GO:0016740(transferase activity);GO:0017080(sodium channel regulator activity);GO:0017081(chloride channel regulator activity);GO:0…	04068(FoxO signaling pathway);04151(PI3K-Akt signaling pathway);04151(PI3K-Akt signaling pathway)			serum/glucocorticoid regulated kinase 2 [Source:MGI Symbol;Acc:MGI:1351318]	0.99	0.77	-0.169019	0.757724	-0.290343	0.771554	1	DOWN	No	No
ENSMUSG00000017943	Gdap1l1	ENSMUST00000109420;ENSMUST00000109421;ENSMUST00000018087	GO:0016020(membrane);GO:0016021(integral component of membrane);GO:0016021(integral component of membrane)				ganglioside-induced differentiation-associated protein 1-like 1 [Source:MGI Symbol;Acc:MGI:2385163]	0.59	0.51	-0.0744782	0.757724	-0.105579	0.915916	1	DOWN	No	No
ENSMUSG00000018168	Ikzf3	ENSMUST00000103141;ENSMUST00000153902;ENSMUST00000140876	GO:0000977(RNA polymerase II regulatory region sequence-specific DNA binding);GO:0001228(transcriptional activator activity, RNA polymerase II transcription regulatory region sequence-specific binding);GO:0003676(nucleic acid binding);GO:0003677(DNA binding);GO:0005515(protein binding);GO:0042802(identical protein binding);GO:0042803(protein homodimerization activity);GO:0043565(sequence-specific…				IKAROS family zinc finger 3 [Source:MGI Symbol;Acc:MGI:1342542]	0.1	0.3	0.241008	0.757724	0.263948	0.79182	1	UP	No	No
ENSMUSG00000018238	Gdf9	ENSMUST00000156037;ENSMUST00000145369;ENSMUST00000018382	GO:0005125(cytokine activity);GO:0005160(transforming growth factor beta receptor binding);GO:0008083(growth factor activity);GO:0001555(oocyte growth);GO:0008284(positive regulation of cell proliferation);GO:0010862(positive regulation of pathway-restricted SMAD protein phosphorylation);GO:0030308(negative regulation of cell growth);GO:0030509(BMP signaling pathway);GO:0042981(regulation of apop…	04913(Ovarian Steroidogenesis);04913(Ovarian Steroidogenesis)			growth differentiation factor 9 [Source:MGI Symbol;Acc:MGI:95692]	0.13	0.15	0.0253111	0.757724	0.0263948	0.978942	1	UP	No	No
ENSMUSG00000018263	Tbx5	ENSMUST00000018407	GO:0005634(nucleus);GO:0006355(regulation of transcription, DNA-templated);GO:0006351(transcription, DNA-templated);GO:0003700(transcription factor activity, sequence-specific DNA binding);GO:0003677(DNA binding);GO:0000977(RNA polymerase II regulatory region sequence-specific DNA binding);GO:0001228(transcriptional activator activity, RNA polymerase II transcription regulatory region sequence-sp…				T-box 5 [Source:MGI Symbol;Acc:MGI:102541]	0.07	0.02	-0.0690416	0.757724	-0.065987	0.947388	1	DOWN	No	No
ENSMUSG00000018387	Shroom1	ENSMUST00000109013;ENSMUST00000146001;ENSMUST00000093114	GO:0016460(myosin II complex);GO:0003779(actin binding);GO:0051015(actin filament binding);GO:0000902(cell morphogenesis);GO:0051017(actin filament bundle assembly);GO:0005737(cytoplasm);GO:0005856(cytoskeleton);GO:0005874(microtubule);GO:0005874(microtubule)	04530(Tight junction);04530(Tight junction)			shroom family member 1 [Source:MGI Symbol;Acc:MGI:1919024]	0.01	0.02	0.0142139	0.757724	0.0131974	0.98947	1	UP	No	No
ENSMUSG00000018451	6330403K07Rik	ENSMUST00000156068					RIKEN cDNA 6330403K07 gene [Source:MGI Symbol;Acc:MGI:1918001]	0.54	0.24	-0.31259	0.757724	-0.395922	0.692162	1	DOWN	No	No
ENSMUSG00000018479	1700125H20Rik	ENSMUST00000018623	GO:0003674(molecular_function);GO:0008150(biological_process);GO:0005575(cellular_component)				RIKEN cDNA 1700125H20 gene [Source:MGI Symbol;Acc:MGI:1920884]	0.02	0.05	0.0418202	0.757724	0.0395922	0.968418	1	UP	No	No
ENSMUSG00000018543	1700001P01Rik	ENSMUST00000107576	GO:0003674(molecular_function);GO:0008150(biological_process);GO:0005575(cellular_component)				RIKEN cDNA 1700001P01 gene [Source:MGI Symbol;Acc:MGI:1919465]	0.16	0.32	0.186413	0.757724	0.211159	0.832764	1	UP	No	No
ENSMUSG00000018570	2810408A11Rik	ENSMUST00000100969;ENSMUST00000018714;ENSMUST00000102580;ENSMUST00000144431;ENSMUST00000129234;ENSMUST00000137122;ENSMUST00000142121;ENSMUST00000128046	GO:0043666(regulation of phosphoprotein phosphatase activity);GO:0043086(negative regulation of catalytic activity);GO:0009966(regulation of signal transduction);GO:0004864(protein phosphatase inhibitor activity);GO:0000164(protein phosphatase type 1 complex);GO:0000164(protein phosphatase type 1 complex)				RIKEN cDNA 2810408A11 gene [Source:MGI Symbol;Acc:MGI:1917669]	0.13	0.12	-0.012824	0.757724	-0.0131974	0.98947	1	DOWN	No	No
ENSMUSG00000018698	Lhx1	ENSMUST00000018842	GO:0003677(DNA binding);GO:0003700(transcription factor activity, sequence-specific DNA binding);GO:0003714(transcription corepressor activity);GO:0005515(protein binding);GO:0008270(zinc ion binding);GO:0043565(sequence-specific DNA binding);GO:0046872(metal ion binding);GO:0001655(urogenital system development);GO:0001656(metanephros development);GO:0001657(ureteric bud development);GO:0001658(…				LIM homeobox protein 1 [Source:MGI Symbol;Acc:MGI:99783]	0	0	0	0.757724	0				No	No
ENSMUSG00000018776	Slc35g3	ENSMUST00000102586	GO:0016021(integral component of membrane);GO:0016020(membrane)				solute carrier family 35, member G3 [Source:MGI Symbol;Acc:MGI:1927128]	0.04	0	-0.0565835	0.757724	-0.0527896	0.9579	1	DOWN	No	No
ENSMUSG00000018800	Abca5	ENSMUST00000043961;ENSMUST00000148984	GO:0000166(nucleotide binding);GO:0005215(transporter activity);GO:0005524(ATP binding);GO:0016887(ATPase activity);GO:0042626(ATPase activity, coupled to transmembrane movement of substances);GO:0006810(transport);GO:0010745(negative regulation of macrophage derived foam cell differentiation);GO:0033344(cholesterol efflux);GO:0034375(high-density lipoprotein particle remodeling);GO:0043691(rever…	02010(ABC transporters);02010(ABC transporters)			ATP-binding cassette, sub-family A (ABC1), member 5 [Source:MGI Symbol;Acc:MGI:2386607]	0.06	0.04	-0.0274807	0.757724	-0.0263948	0.978942	1	DOWN	No	No
ENSMUSG00000018916	Csf2	ENSMUST00000019060	GO:0005125(cytokine activity);GO:0005129(granulocyte macrophage colony-stimulating factor receptor binding);GO:0008083(growth factor activity);GO:0001821(histamine secretion);GO:0001892(embryonic placenta development);GO:0006955(immune response);GO:0008284(positive regulation of cell proliferation);GO:0010468(regulation of gene expression);GO:0010628(positive regulation of gene expression);GO:001…	04060(Cytokine-cytokine receptor interaction);04630(Jak-STAT signaling pathway);04640(Hematopoietic cell lineage);04650(Natural killer cell mediated cytotoxicity);04660(T cell receptor signaling pathway);04664(Fc epsilon RI signaling pathway);04668(TNF signaling pathway);05132(Salmonella infection);05146(Amoebiasis);05166(HTLV-I infection);05202(Transcriptional misregulation in cancers);05323(Rhe…			colony stimulating factor 2 (granulocyte-macrophage) [Source:MGI Symbol;Acc:MGI:1339752]	0.48	0.68	0.182864	0.757724	0.263948	0.79182	1	UP	No	No
ENSMUSG00000018919	Tm4sf5	ENSMUST00000019063	GO:0003674(molecular_function);GO:0008150(biological_process);GO:0016020(membrane);GO:0016021(integral component of membrane)				transmembrane 4 superfamily member 5 [Source:MGI Symbol;Acc:MGI:1922854]	0	0	0	0.757724	0				No	No
ENSMUSG00000018924	Alox15	ENSMUST00000019068	GO:0031234(extrinsic component of cytoplasmic side of plasma membrane);GO:0016020(membrane);GO:0005829(cytosol);GO:0005811(lipid particle);GO:0071277(cellular response to calcium ion);GO:0070374(positive regulation of ERK1 and ERK2 cascade);GO:0055114(oxidation-reduction process);GO:0051122(hepoxilin biosynthetic process);GO:0035963(cellular response to interleukin-13);GO:0034116(positive regulat…	00590(Arachidonic acid metabolism);00591(Linoleic acid metabolism);04726(Serotonergic synapse)			arachidonate 15-lipoxygenase [Source:MGI Symbol;Acc:MGI:87997]	0.09	0.02	-0.095759	0.757724	-0.0923819	0.926395	1	DOWN	No	No
ENSMUSG00000018925	Heatr9	ENSMUST00000019069	GO:0002244(hematopoietic progenitor cell differentiation);GO:0005575(cellular_component)				HEAT repeat containing 9 [Source:MGI Symbol;Acc:MGI:3650286]	0.07	0.04	-0.0410273	0.757724	-0.0395922	0.968418	1	DOWN	No	No
ENSMUSG00000019102	Aldh3a1	ENSMUST00000108716;ENSMUST00000019246	GO:0004028(3-chloroallyl aldehyde dehydrogenase activity);GO:0004029(aldehyde dehydrogenase (NAD) activity);GO:0004030(aldehyde dehydrogenase [NAD(P)+] activity);GO:0008106(alcohol dehydrogenase (NADP+) activity);GO:0016491(oxidoreductase activity);GO:0016620(oxidoreductase activity, acting on the aldehyde or oxo group of donors, NAD or NADP as acceptor);GO:0018479(benzaldehyde dehydrogenase (NAD…	00010(Glycolysis / Gluconeogenesis);00340(Histidine metabolism);00350(Tyrosine metabolism);00360(Phenylalanine metabolism);00410(beta-Alanine metabolism);00980(Metabolism of xenobiotics by cytochrome P450);00982(Drug metabolism - cytochrome P450);05204(Chemical carcinogenesis);05204(Chemical carcinogenesis)			aldehyde dehydrogenase family 3, subfamily A1 [Source:MGI Symbol;Acc:MGI:1353451]	0.01	0.02	0.0142139	0.757724	0.0131974	0.98947	1	UP	No	No
ENSMUSG00000019230	Lhx9	ENSMUST00000019374;ENSMUST00000046870;ENSMUST00000112026;ENSMUST00000192425	GO:0003677(DNA binding);GO:0003714(transcription corepressor activity);GO:0005515(protein binding);GO:0008270(zinc ion binding);GO:0043565(sequence-specific DNA binding);GO:0046872(metal ion binding);GO:0006355(regulation of transcription, DNA-templated);GO:0008045(motor neuron axon guidance);GO:0008283(cell proliferation);GO:0008584(male gonad development);GO:0008585(female gonad development);GO…				LIM homeobox protein 9 [Source:MGI Symbol;Acc:MGI:1316721]	0.29	0.36	0.0762356	0.757724	0.0923819	0.926395	1	UP	No	No
ENSMUSG00000019235	Rps6kl1	ENSMUST00000019379	GO:0000166(nucleotide binding);GO:0004672(protein kinase activity);GO:0004674(protein serine/threonine kinase activity);GO:0005524(ATP binding);GO:0016301(kinase activity);GO:0016740(transferase activity);GO:0006468(protein phosphorylation);GO:0007165(signal transduction);GO:0016310(phosphorylation);GO:0005737(cytoplasm);GO:0005840(ribosome);GO:0030529(intracellular ribonucleoprotein complex)				ribosomal protein S6 kinase-like 1 [Source:MGI Symbol;Acc:MGI:2443413]	0.03	0.21	0.232363	0.757724	0.237553	0.812228	1	UP	No	No
ENSMUSG00000019301	Hsd17b1	ENSMUST00000019445	GO:0004303(estradiol 17-beta-dehydrogenase activity);GO:0016491(oxidoreductase activity);GO:0047035(testosterone dehydrogenase (NAD+) activity);GO:0006629(lipid metabolic process);GO:0006694(steroid biosynthetic process);GO:0006703(estrogen biosynthetic process);GO:0055114(oxidation-reduction process);GO:0060348(bone development);GO:0061370(testosterone biosynthetic process);GO:0071248(cellular r…	00140(Steroid hormone biosynthesis);04913(Ovarian Steroidogenesis)			hydroxysteroid (17-beta) dehydrogenase 1 [Source:MGI Symbol;Acc:MGI:105077]	0.29	0.12	-0.203872	0.757724	-0.224356	0.82248	1	DOWN	No	No
ENSMUSG00000019359	Gdpd2	ENSMUST00000144912;ENSMUST00000156336;ENSMUST00000019503;ENSMUST00000113744;ENSMUST00000151572	GO:0008081(phosphoric diester hydrolase activity);GO:0008889(glycerophosphodiester phosphodiesterase activity);GO:0016787(hydrolase activity);GO:0046872(metal ion binding);GO:0047394(glycerophosphoinositol inositolphosphodiesterase activity);GO:0006629(lipid metabolic process);GO:0045669(positive regulation of osteoblast differentiation);GO:0090527(actin filament reorganization);GO:0005737(cytopl…				glycerophosphodiester phosphodiesterase domain containing 2 [Source:MGI Symbol;Acc:MGI:1918834]	0.28	0.16	-0.142019	0.757724	-0.158369	0.874166	1	DOWN	No	No
ENSMUSG00000019489	Cd70	ENSMUST00000019633	GO:0002020(protease binding);GO:0005102(receptor binding);GO:0005125(cytokine activity);GO:0005164(tumor necrosis factor receptor binding);GO:0006955(immune response);GO:0007165(signal transduction);GO:0007267(cell-cell signaling);GO:0008283(cell proliferation);GO:0097191(extrinsic apoptotic signaling pathway);GO:0005615(extracellular space);GO:0005886(plasma membrane);GO:0016020(membrane);GO:001…	04060(Cytokine-cytokine receptor interaction)			CD70 antigen [Source:MGI Symbol;Acc:MGI:1195273]	0	0	0	0.757724	0				No	No
ENSMUSG00000019647	Sema6a	ENSMUST00000019791;ENSMUST00000115449;ENSMUST00000076043;ENSMUST00000135790;ENSMUST00000151382;ENSMUST00000144223	GO:0004888(transmembrane signaling receptor activity);GO:0005515(protein binding);GO:0030215(semaphorin receptor binding);GO:0001764(neuron migration);GO:0006915(apoptotic process);GO:0007166(cell surface receptor signaling pathway);GO:0007275(multicellular organism development);GO:0007399(nervous system development);GO:0007411(axon guidance);GO:0030154(cell differentiation);GO:0051642(centrosome…	04360(Axon guidance);04360(Axon guidance)			sema domain, transmembrane domain (TM), and cytoplasmic domain, (semaphorin) 6A [Source:MGI Symbol;Acc:MGI:1203727]	0.09	0.06	-0.0402639	0.757724	-0.0395922	0.968418	1	DOWN	No	No
ENSMUSG00000019767	Ccdc170	ENSMUST00000138112	GO:0005575(cellular_component);GO:0008150(biological_process);GO:0003674(molecular_function)				coiled-coil domain containing 170 [Source:MGI Symbol;Acc:MGI:2685067]	0.07	0.01	-0.0832555	0.757724	-0.0791845	0.936886	1	DOWN	No	No
ENSMUSG00000019789	Hey2	ENSMUST00000019924;ENSMUST00000217504	GO:0000988(transcription factor activity, protein binding);GO:0001102(RNA polymerase II activating transcription factor binding);GO:0003677(DNA binding);GO:0003700(transcription factor activity, sequence-specific DNA binding);GO:0035939(microsatellite binding);GO:0042826(histone deacetylase binding);GO:0043565(sequence-specific DNA binding);GO:0046983(protein dimerization activity);GO:0000122(neg…				hairy/enhancer-of-split related with YRPW motif 2 [Source:MGI Symbol;Acc:MGI:1341884]	0.08	0.02	-0.0824622	0.757724	-0.0791845	0.936886	1	DOWN	No	No
ENSMUSG00000019852	Arfgef3	ENSMUST00000215836	GO:0005085(guanyl-nucleotide exchange factor activity);GO:0005086(ARF guanyl-nucleotide exchange factor activity);GO:0010923(negative regulation of phosphatase activity);GO:0032012(regulation of ARF protein signal transduction);GO:0043547(positive regulation of GTPase activity);GO:0016020(membrane);GO:0016021(integral component of membrane);GO:0030133(transport vesicle);GO:0030658(transport vesic…				ARFGEF family member 3 [Source:MGI Symbol;Acc:MGI:106387]	0.01	0	-0.0143553	0.757724	-0.0131974	0.98947	1	DOWN	No	No
ENSMUSG00000019856	Fam184a	ENSMUST00000020003	GO:0005615(extracellular space);GO:0008150(biological_process);GO:0003674(molecular_function)				family with sequence similarity 184, member A [Source:MGI Symbol;Acc:MGI:1923156]	0	0.02	0.0285692	0.757724	0.0263948	0.978942	1	UP	No	No
ENSMUSG00000019906	Lin7a	ENSMUST00000020057	GO:0005515(protein binding);GO:0097016(L27 domain binding);GO:0006810(transport);GO:0006887(exocytosis);GO:0007269(neurotransmitter secretion);GO:0015031(protein transport);GO:0045199(maintenance of epithelial cell apical/basal polarity);GO:0048489(synaptic vesicle transport);GO:0048839(inner ear development);GO:1903361(protein localization to basolateral plasma membrane);GO:0005886(plasma membra…				lin-7 homolog A (C. elegans) [Source:MGI Symbol;Acc:MGI:2135609]	0.02	0.04	0.0280144	0.757724	0.0263948	0.978942	1	UP	No	No
ENSMUSG00000019935	Slc17a8	ENSMUST00000020102	GO:0005313(L-glutamate transmembrane transporter activity);GO:0015293(symporter activity);GO:0003407(neural retina development);GO:0006810(transport);GO:0006811(ion transport);GO:0006814(sodium ion transport);GO:0006836(neurotransmitter transport);GO:0007420(brain development);GO:0007605(sensory perception of sound);GO:0015813(L-glutamate transport);GO:0055085(transmembrane transport);GO:0089711(…	04721(Synaptic vesicle cycle);04723(Retrograde endocannabinoid signaling);04724(Glutamatergic synapse);05033(Nicotine addiction)			solute carrier family 17 (sodium-dependent inorganic phosphate cotransporter), member 8 [Source:MGI Symbol;Acc:MGI:3039629]	0.02	0.02	0	0.757724	0	1	1		No	No
ENSMUSG00000019982	Myb	ENSMUST00000188495;ENSMUST00000020158;ENSMUST00000186446;ENSMUST00000216985;ENSMUST00000216751	GO:2000845(positive regulation of testosterone secretion);GO:2000491(positive regulation of hepatic stellate cell activation);GO:1904899(positive regulation of hepatic stellate cell proliferation);GO:1901216(positive regulation of neuron death);GO:0071636(positive regulation of transforming growth factor beta production);GO:0071300(cellular response to retinoic acid);GO:0070301(cellular response …	04151(PI3K-Akt signaling pathway);05166(HTLV-I infection);05166(HTLV-I infection)			myeloblastosis oncogene [Source:MGI Symbol;Acc:MGI:97249]	0.07	0.05	-0.0272215	0.757724	-0.0263948	0.978942	1	DOWN	No	No
ENSMUSG00000019986	Ahi1	ENSMUST00000105525;ENSMUST00000214745;ENSMUST00000214893;ENSMUST00000215543	GO:0036064(ciliary basal body);GO:0005929(cilium);GO:0005912(adherens junction);GO:0005911(cell-cell junction);GO:0005813(centrosome);GO:0042802(identical protein binding);GO:0042802(identical protein binding)				Abelson helper integration site 1 [Source:MGI Symbol;Acc:MGI:87971]	0.82	0.65	-0.141472	0.757724	-0.224356	0.82248	1	DOWN	No	No
ENSMUSG00000019996	Map7	ENSMUST00000020173;ENSMUST00000116259;ENSMUST00000214231;ENSMUST00000214823;ENSMUST00000215812;ENSMUST00000216474;ENSMUST00000216308	GO:0015630(microtubule cytoskeleton);GO:0000226(microtubule cytoskeleton organization);GO:0005829(cytosol);GO:0005829(cytosol)				microtubule-associated protein 7 [Source:MGI Symbol;Acc:MGI:1328328]	0.02	0.04	0.0280144	0.757724	0.0263948	0.978942	1	UP	No	No
ENSMUSG00000020000	Moxd1	ENSMUST00000095784	GO:0003824(catalytic activity);GO:0004497(monooxygenase activity);GO:0004500(dopamine beta-monooxygenase activity);GO:0005507(copper ion binding);GO:0016491(oxidoreductase activity);GO:0016715(oxidoreductase activity, acting on paired donors, with incorporation or reduction of molecular oxygen, reduced ascorbate as one donor, and incorporation of one atom of oxygen);GO:0046872(metal ion binding);…				monooxygenase, DBH-like 1 [Source:MGI Symbol;Acc:MGI:1921582]	0.02	0.32	0.371969	0.757724	0.395922	0.692162	1	UP	No	No
ENSMUSG00000020007	Il20ra	ENSMUST00000020185	GO:0004896(cytokine receptor activity);GO:0042015(interleukin-20 binding);GO:0019221(cytokine-mediated signaling pathway);GO:0045124(regulation of bone resorption);GO:2001244(positive regulation of intrinsic apoptotic signaling pathway);GO:0005886(plasma membrane);GO:0016020(membrane);GO:0016021(integral component of membrane)	04060(Cytokine-cytokine receptor interaction);04630(Jak-STAT signaling pathway)			interleukin 20 receptor, alpha [Source:MGI Symbol;Acc:MGI:3605069]	0.02	0.02	0	0.757724	0	1	1		No	No
ENSMUSG00000020010	Vnn3	ENSMUST00000020190	GO:0016787(hydrolase activity);GO:0016810(hydrolase activity, acting on carbon-nitrogen (but not peptide) bonds);GO:0016811(hydrolase activity, acting on carbon-nitrogen (but not peptide) bonds, in linear amides);GO:0017159(pantetheine hydrolase activity);GO:0006807(nitrogen compound metabolic process);GO:0015939(pantothenate metabolic process);GO:0005615(extracellular space);GO:0005886(plasma me…	00770(Pantothenate and CoA biosynthesis)			vanin 3 [Source:MGI Symbol;Acc:MGI:1347055]	0.11	0.02	-0.121991	0.757724	-0.118777	0.905452	1	DOWN	No	No
ENSMUSG00000020014	Cfap54	ENSMUST00000168110;ENSMUST00000212902;ENSMUST00000067705;ENSMUST00000171781	GO:0003674(molecular_function);GO:0007283(spermatogenesis);GO:0030030(cell projection organization);GO:0030154(cell differentiation);GO:0060271(cilium assembly);GO:0060294(cilium movement involved in cell motility);GO:0005575(cellular_component);GO:0005737(cytoplasm);GO:0005856(cytoskeleton);GO:0005929(cilium);GO:0005930(axoneme);GO:0042995(cell projection);GO:0042995(cell projection)				cilia and flagella associated protein 54 [Source:MGI Symbol;Acc:MGI:1922208]	0	0	0	0.757724	0				No	No
ENSMUSG00000020017	Hal	ENSMUST00000129421;ENSMUST00000152883	GO:0005737(cytoplasm);GO:0019557(histidine catabolic process to glutamate and formate);GO:0019556(histidine catabolic process to glutamate and formamide);GO:0006548(histidine catabolic process);GO:0006547(histidine metabolic process);GO:0016841(ammonia-lyase activity);GO:0016829(lyase activity);GO:0004397(histidine ammonia-lyase activity);GO:0003824(catalytic activity);GO:0003824(catalytic activi…	00340(Histidine metabolism);00340(Histidine metabolism)	K01745	EC:4.3.1.3	histidine ammonia lyase [Source:MGI Symbol;Acc:MGI:96010]	0.14	0.3	0.189478	0.757724	0.211159	0.832764	1	UP	No	No
ENSMUSG00000020062	Slc5a8	ENSMUST00000020255	GO:0005215(transporter activity);GO:0015293(symporter activity);GO:0006810(transport);GO:0006811(ion transport);GO:0006814(sodium ion transport);GO:0006915(apoptotic process);GO:0055085(transmembrane transport);GO:0005886(plasma membrane);GO:0016020(membrane);GO:0016021(integral component of membrane);GO:0016324(apical plasma membrane);GO:0070062(extracellular exosome)				solute carrier family 5 (iodide transporter), member 8 [Source:MGI Symbol;Acc:MGI:2384916]	0	0.01	0.0143553	0.757724	0.0131974	0.98947	1	UP	No	No
ENSMUSG00000020072	Pbld2	ENSMUST00000124784;ENSMUST00000020262;ENSMUST00000130531	GO:0009058(biosynthetic process);GO:0003824(catalytic activity);GO:0003674(molecular_function);GO:0016853(isomerase activity);GO:0008150(biological_process);GO:0008150(biological_process)		K15857	EC:5.1.-.-	phenazine biosynthesis-like protein domain containing 2 [Source:MGI Symbol;Acc:MGI:1914557]	0.02	0.07	0.0690416	0.757724	0.065987	0.947388	1	UP	No	No
ENSMUSG00000020080	Hkdc1	ENSMUST00000020277;ENSMUST00000159579	GO:0000166(nucleotide binding);GO:0004340(glucokinase activity);GO:0004396(hexokinase activity);GO:0005524(ATP binding);GO:0005536(glucose binding);GO:0008865(fructokinase activity);GO:0016301(kinase activity);GO:0016740(transferase activity);GO:0016773(phosphotransferase activity, alcohol group as acceptor);GO:0019158(mannokinase activity);GO:0001678(cellular glucose homeostasis);GO:0005975(carb…	00010(Glycolysis / Gluconeogenesis);00051(Fructose and mannose metabolism);00052(Galactose metabolism);00500(Starch and sucrose metabolism);00520(Amino sugar and nucleotide sugar metabolism);00524(Butirosin and neomycin biosynthesis);01200(Carbon metabolism);04066(HIF-1 signaling pathway);04910(Insulin signaling pathway);04930(Type II diabetes mellitus);04973(Carbohydrate digestion and absorption…	K00844	EC:2.7.1.1	hexokinase domain containing 1 [Source:MGI Symbol;Acc:MGI:2384910]	0.06	0.09	0.0402639	0.757724	0.0395922	0.968418	1	UP	No	No
ENSMUSG00000020081	Tacr2	ENSMUST00000020278	GO:0004871(signal transducer activity);GO:0004930(G-protein coupled receptor activity);GO:0004995(tachykinin receptor activity);GO:0016497(substance K receptor activity);GO:0007165(signal transduction);GO:0007186(G-protein coupled receptor signaling pathway);GO:0007217(tachykinin receptor signaling pathway);GO:0007268(chemical synaptic transmission);GO:0014057(positive regulation of acetylcholine…	04020(Calcium signaling pathway);04080(Neuroactive ligand-receptor interaction)			tachykinin receptor 2 [Source:MGI Symbol;Acc:MGI:98477]	0.08	0.04	-0.0544478	0.757724	-0.0527896	0.9579	1	DOWN	No	No
ENSMUSG00000020090	Npffr1	ENSMUST00000020287	GO:0016021(integral component of membrane);GO:0016020(membrane);GO:0005887(integral component of plasma membrane);GO:1901652(response to peptide);GO:0032870(cellular response to hormone stimulus);GO:0007218(neuropeptide signaling pathway);GO:0007186(G-protein coupled receptor signaling pathway);GO:0007165(signal transduction);GO:0042277(peptide binding);GO:0008188(neuropeptide receptor activity);…	04080(Neuroactive ligand-receptor interaction)			neuropeptide FF receptor 1 [Source:MGI Symbol;Acc:MGI:2685082]	0	0	0	0.757724	0				No	No
ENSMUSG00000020102	Slc16a7	ENSMUST00000211781;ENSMUST00000210780;ENSMUST00000210069;ENSMUST00000209246	GO:0008028(monocarboxylic acid transmembrane transporter activity);GO:0015129(lactate transmembrane transporter activity);GO:0015293(symporter activity);GO:0050833(pyruvate transmembrane transporter activity);GO:0006810(transport);GO:0015718(monocarboxylic acid transport);GO:0035873(lactate transmembrane transport);GO:0055085(transmembrane transport);GO:1901475(pyruvate transmembrane transport);G…				solute carrier family 16 (monocarboxylic acid transporters), member 7 [Source:MGI Symbol;Acc:MGI:1330284]	0.15	0.09	-0.0773057	0.757724	-0.0791845	0.936886	1	DOWN	No	No
ENSMUSG00000020123	Avpr1a	ENSMUST00000020323	GO:0004871(signal transducer activity);GO:0004930(G-protein coupled receptor activity);GO:0005000(vasopressin receptor activity);GO:0017046(peptide hormone binding);GO:0031894(V1A vasopressin receptor binding);GO:0002125(maternal aggressive behavior);GO:0003084(positive regulation of systemic arterial blood pressure);GO:0007165(signal transduction);GO:0007186(G-protein coupled receptor signaling …	04020(Calcium signaling pathway);04080(Neuroactive ligand-receptor interaction);04270(Vascular smooth muscle contraction)			arginine vasopressin receptor 1A [Source:MGI Symbol;Acc:MGI:1859216]	0.07	0.08	0.0134205	0.757724	0.0131974	0.98947	1	UP	No	No
ENSMUSG00000020125	Elane	ENSMUST00000046091	GO:0001106(RNA polymerase II transcription corepressor activity);GO:0002020(protease binding);GO:0004175(endopeptidase activity);GO:0004252(serine-type endopeptidase activity);GO:0008201(heparin binding);GO:0008233(peptidase activity);GO:0008236(serine-type peptidase activity);GO:0016787(hydrolase activity);GO:0019955(cytokine binding);GO:0000122(negative regulation of transcription from RNA poly…	05202(Transcriptional misregulation in cancers);05322(Systemic lupus erythematosus)			elastase, neutrophil expressed [Source:MGI Symbol;Acc:MGI:2679229]	0	0	0	0.757724	0				No	No
ENSMUSG00000020140	Lgr5	ENSMUST00000020350;ENSMUST00000144732;ENSMUST00000129309	GO:0004871(signal transducer activity);GO:0004888(transmembrane signaling receptor activity);GO:0001942(hair follicle development);GO:0007165(signal transduction);GO:0007186(G-protein coupled receptor signaling pathway);GO:0009994(oocyte differentiation);GO:0042127(regulation of cell proliferation);GO:0048839(inner ear development);GO:0090263(positive regulation of canonical Wnt signaling pathway…	04080(Neuroactive ligand-receptor interaction);04080(Neuroactive ligand-receptor interaction)			leucine rich repeat containing G protein coupled receptor 5 [Source:MGI Symbol;Acc:MGI:1341817]	0.03	0.03	0	0.757724	0	1	1		No	No
ENSMUSG00000020151	Ptprr	ENSMUST00000063470	GO:0004721(phosphoprotein phosphatase activity);GO:0004725(protein tyrosine phosphatase activity);GO:0016787(hydrolase activity);GO:0016791(phosphatase activity);GO:0001701(in utero embryonic development);GO:0006470(protein dephosphorylation);GO:0010633(negative regulation of epithelial cell migration);GO:0016311(dephosphorylation);GO:0035335(peptidyl-tyrosine dephosphorylation);GO:0038128(ERBB2 …	04010(MAPK signaling pathway)			protein tyrosine phosphatase, receptor type, R [Source:MGI Symbol;Acc:MGI:109559]	0	0	0	0.757724	0				No	No
ENSMUSG00000020175	Rab36	ENSMUST00000136944;ENSMUST00000147802;ENSMUST00000020391;ENSMUST00000142507;ENSMUST00000122815;ENSMUST00000146440;ENSMUST00000151432	GO:0000166(nucleotide binding);GO:0005525(GTP binding);GO:0006810(transport);GO:0007264(small GTPase mediated signal transduction);GO:0015031(protein transport);GO:0000139(Golgi membrane);GO:0005794(Golgi apparatus);GO:0016020(membrane);GO:0005622(intracellular);GO:0005622(intracellular)				RAB36, member RAS oncogene family [Source:MGI Symbol;Acc:MGI:1924127]	1.06	0.63	-0.337772	0.757724	-0.567489	0.570382	1	DOWN	No	No
ENSMUSG00000020183	Cpm	ENSMUST00000123374;ENSMUST00000020399;ENSMUST00000141991	GO:0004180(carboxypeptidase activity);GO:0004181(metallocarboxypeptidase activity);GO:0008233(peptidase activity);GO:0008237(metallopeptidase activity);GO:0008270(zinc ion binding);GO:0016787(hydrolase activity);GO:0046872(metal ion binding);GO:0006508(proteolysis);GO:0006518(peptide metabolic process);GO:0016485(protein processing);GO:0005615(extracellular space);GO:0005886(plasma membrane);GO:0…				carboxypeptidase M [Source:MGI Symbol;Acc:MGI:1917824]	0.11	0.1	-0.0130562	0.757724	-0.0131974	0.98947	1	DOWN	No	No
ENSMUSG00000020191	4930415F15Rik	ENSMUST00000020410	GO:0003674(molecular_function);GO:0008150(biological_process);GO:0005575(cellular_component)				RIKEN cDNA 4930415F15 gene [Source:MGI Symbol;Acc:MGI:1921112]	0.01	0	-0.0143553	0.757724	-0.0131974	0.98947	1	DOWN	No	No
ENSMUSG00000020193	Zpbp	ENSMUST00000020413	GO:0007339(binding of sperm to zona pellucida);GO:0005576(extracellular region);GO:0005634(nucleus)				zona pellucida binding protein [Source:MGI Symbol;Acc:MGI:1855701]	0.02	0.02	0	0.757724	0	1	1		No	No
ENSMUSG00000020218	Wif1	ENSMUST00000020439	GO:0017147(Wnt-protein binding);GO:0007275(multicellular organism development);GO:0016055(Wnt signaling pathway);GO:0030178(negative regulation of Wnt signaling pathway);GO:0045600(positive regulation of fat cell differentiation);GO:0090090(negative regulation of canonical Wnt signaling pathway);GO:0005576(extracellular region)	04310(Wnt signaling pathway)			Wnt inhibitory factor 1 [Source:MGI Symbol;Acc:MGI:1344332]	0	0	0	0.757724	0				No	No
ENSMUSG00000020258	Glyctk	ENSMUST00000036382;ENSMUST00000112543;ENSMUST00000162562	GO:0005829(cytosol);GO:0005794(Golgi apparatus);GO:0005737(cytoplasm);GO:0006468(protein phosphorylation);GO:0008887(glycerate kinase activity);GO:0008887(glycerate kinase activity)	00260(Glycine, serine and threonine metabolism);00561(Glycerolipid metabolism);00630(Glyoxylate and dicarboxylate metabolism);00630(Glyoxylate and dicarboxylate metabolism)			glycerate kinase [Source:MGI Symbol;Acc:MGI:2444085]	0.4	0.31	-0.09586	0.757724	-0.118777	0.905452	1	DOWN	No	No
ENSMUSG00000020279	Il9r	ENSMUST00000145401;ENSMUST00000128311	GO:0004896(cytokine receptor activity);GO:0019221(cytokine-mediated signaling pathway);GO:1903955(positive regulation of protein targeting to mitochondrion);GO:0005576(extracellular region);GO:0005886(plasma membrane);GO:0016020(membrane);GO:0016021(integral component of membrane);GO:0038113(interleukin-9-mediated signaling pathway);GO:0030307(positive regulation of cell growth);GO:0019983(interl…	04060(Cytokine-cytokine receptor interaction);04630(Jak-STAT signaling pathway);04640(Hematopoietic cell lineage);04640(Hematopoietic cell lineage)			interleukin 9 receptor [Source:MGI Symbol;Acc:MGI:96564]	0.03	0	-0.0426443	0.757724	-0.0395922	0.968418	1	DOWN	No	No
ENSMUSG00000020286	1700093K21Rik	ENSMUST00000020527;ENSMUST00000169264;ENSMUST00000140122;ENSMUST00000156629	GO:0003674(molecular_function);GO:0008150(biological_process);GO:0005575(cellular_component);GO:0016020(membrane);GO:0016021(integral component of membrane);GO:0016021(integral component of membrane)				RIKEN cDNA 1700093K21 gene [Source:MGI Symbol;Acc:MGI:1914608]	0.17	0.05	-0.156119	0.757724	-0.158369	0.874166	1	DOWN	No	No
ENSMUSG00000020295	Hbq1a	ENSMUST00000020535	GO:0003674(molecular_function);GO:0005344(oxygen transporter activity);GO:0005506(iron ion binding);GO:0019825(oxygen binding);GO:0020037(heme binding);GO:0046872(metal ion binding);GO:0006810(transport);GO:0008150(biological_process);GO:0015671(oxygen transport);GO:0005575(cellular_component);GO:0005833(hemoglobin complex)				hemoglobin, theta 1A [Source:MGI Symbol;Acc:MGI:2685722]	0.19	0.17	-0.024453	0.757724	-0.0263948	0.978942	1	DOWN	No	No
ENSMUSG00000020297	Nsg2	ENSMUST00000109409;ENSMUST00000020537;ENSMUST00000093219	GO:0032051(clathrin light chain binding);GO:0007212(dopamine receptor signaling pathway);GO:0016197(endosomal transport);GO:0048268(clathrin coat assembly);GO:0005768(endosome);GO:0005794(Golgi apparatus);GO:0016020(membrane);GO:0016021(integral component of membrane);GO:0030659(cytoplasmic vesicle membrane);GO:0031410(cytoplasmic vesicle);GO:0032580(Golgi cisterna membrane);GO:0032585(multivesic…				neuron specific gene family member 2 [Source:MGI Symbol;Acc:MGI:1202070]	0.06	0.1	0.0534393	0.757724	0.0527896	0.9579	1	UP	No	No
ENSMUSG00000020310	Madcam1	ENSMUST00000020554	GO:0016021(integral component of membrane);GO:0016020(membrane);GO:0005886(plasma membrane);GO:0050901(leukocyte tethering or rolling);GO:0043113(receptor clustering);GO:0034113(heterotypic cell-cell adhesion);GO:0007568(aging);GO:0007229(integrin-mediated signaling pathway);GO:0007160(cell-matrix adhesion);GO:0007155(cell adhesion);GO:0002687(positive regulation of leukocyte migration);GO:009864…	04514(Cell adhesion molecules (CAMs));04672(Intestinal immune network for IgA production)			mucosal vascular addressin cell adhesion molecule 1 [Source:MGI Symbol;Acc:MGI:103579]	0.02	0	-0.0285692	0.757724	-0.0263948	0.978942	1	DOWN	No	No
ENSMUSG00000020312	Shc2	ENSMUST00000168116;ENSMUST00000020564;ENSMUST00000166450	GO:0005622(intracellular);GO:0035556(intracellular signal transduction);GO:0000187(activation of MAPK activity);GO:0030971(receptor tyrosine kinase binding);GO:0007169(transmembrane receptor protein tyrosine kinase signaling pathway);GO:0005886(plasma membrane);GO:0005886(plasma membrane)	04012(ErbB signaling pathway);04014(Ras signaling pathway);04062(Chemokine signaling pathway);04370(VEGF signaling pathway);04510(Focal adhesion);04650(Natural killer cell mediated cytotoxicity);04722(Neurotrophin signaling pathway);04910(Insulin signaling pathway);04915(Estrogen signaling pathway);04917(Prolactin signaling pathway);05034(Alcoholism);05100(Bacterial invasion of epithelial cells);…			SHC (Src homology 2 domain containing) transforming protein 2 [Source:MGI Symbol;Acc:MGI:106180]	0.09	0.11	0.0262315	0.757724	0.0263948	0.978942	1	UP	No	No
ENSMUSG00000020335	Zfp354b	ENSMUST00000109124;ENSMUST00000152296	GO:0003676(nucleic acid binding);GO:0003677(DNA binding);GO:0003682(chromatin binding);GO:0003700(transcription factor activity, sequence-specific DNA binding);GO:0046872(metal ion binding);GO:0000122(negative regulation of transcription from RNA polymerase II promoter);GO:0006351(transcription, DNA-templated);GO:0006355(regulation of transcription, DNA-templated);GO:0005622(intracellular);GO:000…				zinc finger protein 354B [Source:MGI Symbol;Acc:MGI:1351476]	0.02	0	-0.0285692	0.757724	-0.0263948	0.978942	1	DOWN	No	No
ENSMUSG00000020364	Zfp354a	ENSMUST00000102766;ENSMUST00000156914;ENSMUST00000109122	GO:0003676(nucleic acid binding);GO:0003677(DNA binding);GO:0003700(transcription factor activity, sequence-specific DNA binding);GO:0046872(metal ion binding);GO:0000122(negative regulation of transcription from RNA polymerase II promoter);GO:0001666(response to hypoxia);GO:0001822(kidney development);GO:0006351(transcription, DNA-templated);GO:0006355(regulation of transcription, DNA-templated)…				zinc finger protein 354A [Source:MGI Symbol;Acc:MGI:103172]	0.02	0.04	0.0280144	0.757724	0.0263948	0.978942	1	UP	No	No
ENSMUSG00000020374	Rasgef1c	ENSMUST00000063444	GO:0005622(intracellular);GO:0043547(positive regulation of GTPase activity);GO:0007264(small GTPase mediated signal transduction);GO:0005085(guanyl-nucleotide exchange factor activity)				RasGEF domain family, member 1C [Source:MGI Symbol;Acc:MGI:1921813]	0.02	0	-0.0285692	0.757724	-0.0263948	0.978942	1	DOWN	No	No
ENSMUSG00000020396	Nefh	ENSMUST00000093369	GO:0005198(structural molecule activity);GO:0019901(protein kinase binding);GO:0000226(microtubule cytoskeleton organization);GO:0033693(neurofilament bundle assembly);GO:0045104(intermediate filament cytoskeleton organization);GO:0045110(intermediate filament bundle assembly);GO:0048936(peripheral nervous system neuron axonogenesis);GO:0060052(neurofilament cytoskeleton organization);GO:0061564(…	05014(Amyotrophic lateral sclerosis (ALS))			neurofilament, heavy polypeptide [Source:MGI Symbol;Acc:MGI:97309]	0.04	0.01	-0.0422282	0.757724	-0.0395922	0.968418	1	DOWN	No	No
ENSMUSG00000020401	Fam71b	ENSMUST00000139280;ENSMUST00000063166	GO:0003674(molecular_function);GO:0008150(biological_process);GO:0005634(nucleus);GO:0005634(nucleus)				family with sequence similarity 71, member B [Source:MGI Symbol;Acc:MGI:3650836]	0.03	0.09	0.0816838	0.757724	0.0791845	0.936886	1	UP	No	No
ENSMUSG00000020411	Nipal4	ENSMUST00000020679	GO:0003674(molecular_function);GO:0015095(magnesium ion transmembrane transporter activity);GO:0006810(transport);GO:0006811(ion transport);GO:0015693(magnesium ion transport);GO:1903830(magnesium ion transmembrane transport);GO:0016020(membrane);GO:0016021(integral component of membrane)				NIPA-like domain containing 4 [Source:MGI Symbol;Acc:MGI:2444671]	0.03	0.01	-0.028289	0.757724	-0.0263948	0.978942	1	DOWN	No	No
ENSMUSG00000020419	Hormad2	ENSMUST00000109948;ENSMUST00000109949	GO:0005515(protein binding);GO:0007126(meiotic nuclear division);GO:0051177(meiotic sister chromatid cohesion);GO:0051321(meiotic cell cycle);GO:0000795(synaptonemal complex);GO:0005634(nucleus);GO:0005694(chromosome);GO:0005694(chromosome)				HORMA domain containing 2 [Source:MGI Symbol;Acc:MGI:1923078]	0	0.1	0.137504	0.757724	0.131974	0.895005	1	UP	No	No
ENSMUSG00000020420	Zfp607a	ENSMUST00000205715;ENSMUST00000205534;ENSMUST00000053722	GO:0003676(nucleic acid binding);GO:0003700(transcription factor activity, sequence-specific DNA binding);GO:0046872(metal ion binding);GO:0006355(regulation of transcription, DNA-templated);GO:0005575(cellular_component);GO:0005622(intracellular);GO:0005622(intracellular)				zinc finger protein 607A [Source:MGI Symbol;Acc:MGI:3584526]	0.07	0.51	0.496938	0.757724	0.580686	0.561452	1	UP	No	No
ENSMUSG00000020435	Osbp2	ENSMUST00000070552;ENSMUST00000101632;ENSMUST00000135250	GO:0006810(transport);GO:0006869(lipid transport);GO:0008289(lipid binding);GO:0015485(cholesterol binding);GO:0007286(spermatid development);GO:0016020(membrane);GO:0097440(apical dendrite);GO:0097440(apical dendrite)				oxysterol binding protein 2 [Source:MGI Symbol;Acc:MGI:1921559]	0.47	0.38	-0.0911479	0.757724	-0.118777	0.905452	1	DOWN	No	No
ENSMUSG00000020447	Npc1l1	ENSMUST00000004505	GO:0005319(lipid transporter activity);GO:0008144(drug binding);GO:0017137(Rab GTPase binding);GO:0031489(myosin V binding);GO:0006695(cholesterol biosynthetic process);GO:0030299(intestinal cholesterol absorption);GO:0030301(cholesterol transport);GO:0042157(lipoprotein metabolic process);GO:0042493(response to drug);GO:0016020(membrane);GO:0016021(integral component of membrane);GO:0031526(brus…	04975(Fat digestion and absorption)			NPC1-like 1 [Source:MGI Symbol;Acc:MGI:2685089]	0.04	0.07	0.0410273	0.757724	0.0395922	0.968418	1	UP	No	No
ENSMUSG00000020469	Myl7	ENSMUST00000102921	GO:0005509(calcium ion binding);GO:0031672(A band);GO:0005515(protein binding);GO:0046872(metal ion binding);GO:0016459(myosin complex);GO:0043197(dendritic spine)	04510(Focal adhesion);04530(Tight junction);04670(Leukocyte transendothelial migration);04810(Regulation of actin cytoskeleton)			myosin, light polypeptide 7, regulatory [Source:MGI Symbol;Acc:MGI:107495]	0.04	0	-0.0565835	0.757724	-0.0527896	0.9579	1	DOWN	No	No
ENSMUSG00000020481	Ankrd36	ENSMUST00000109856;ENSMUST00000109855	GO:0003674(molecular_function);GO:0008150(biological_process);GO:0005575(cellular_component);GO:0005575(cellular_component)				ankyrin repeat domain 36 [Source:MGI Symbol;Acc:MGI:1923639]	0.01	0	-0.0143553	0.757724	-0.0131974	0.98947	1	DOWN	No	No
ENSMUSG00000020524	Gria1	ENSMUST00000036315	GO:0004872(receptor activity);GO:0004970(ionotropic glutamate receptor activity);GO:0004971(AMPA glutamate receptor activity);GO:0005216(ion channel activity);GO:0005234(extracellular-glutamate-gated ion channel activity);GO:0005515(protein binding);GO:0099583(neurotransmitter receptor activity involved in regulation of postsynaptic cytosolic calcium ion concentration);GO:1904315(transmitter-gate…	04024(cAMP signaling pathway);04080(Neuroactive ligand-receptor interaction);04713(Circadian entrainment);04720(Long-term potentiation);04723(Retrograde endocannabinoid signaling);04724(Glutamatergic synapse);04728(Dopaminergic synapse);04730(Long-term depression);05014(Amyotrophic lateral sclerosis (ALS));05031(Amphetamine addiction);05033(Nicotine addiction)			glutamate receptor, ionotropic, AMPA1 (alpha 1) [Source:MGI Symbol;Acc:MGI:95808]	0.01	0.01	0	0.757724	0	1	1		No	No
ENSMUSG00000020583	Matn3	ENSMUST00000020899	GO:0005509(calcium ion binding);GO:0005576(extracellular region);GO:0005578(proteinaceous extracellular matrix)				matrilin 3 [Source:MGI Symbol;Acc:MGI:1328350]	0.17	0.22	0.0603726	0.757724	0.065987	0.947388	1	UP	No	No
ENSMUSG00000020591	Ntsr2	ENSMUST00000111064	GO:0004871(signal transducer activity);GO:0004930(G-protein coupled receptor activity);GO:0016492(G-protein coupled neurotensin receptor activity);GO:0007165(signal transduction);GO:0007186(G-protein coupled receptor signaling pathway);GO:0007200(phospholipase C-activating G-protein coupled receptor signaling pathway);GO:0007218(neuropeptide signaling pathway);GO:0042391(regulation of membrane po…	04080(Neuroactive ligand-receptor interaction)			neurotensin receptor 2 [Source:MGI Symbol;Acc:MGI:108018]	0	0	0	0.757724	0				No	No
ENSMUSG00000020598	Nrcam	ENSMUST00000110748;ENSMUST00000219592;ENSMUST00000020939;ENSMUST00000220123;ENSMUST00000220082;ENSMUST00000217796;ENSMUST00000218062	GO:0005515(protein binding);GO:0030506(ankyrin binding);GO:0086080(protein binding involved in heterotypic cell-cell adhesion);GO:0007155(cell adhesion);GO:0007411(axon guidance);GO:0007417(central nervous system development);GO:0008104(protein localization);GO:0010975(regulation of neuron projection development);GO:0016337(single organismal cell-cell adhesion);GO:0019227(neuronal action potentia…	04514(Cell adhesion molecules (CAMs));04514(Cell adhesion molecules (CAMs))			neuronal cell adhesion molecule [Source:MGI Symbol;Acc:MGI:104750]	0.01	0.01	0	0.757724	0	1	1		No	No
ENSMUSG00000020599	Rgs9	ENSMUST00000020920;ENSMUST00000106706;ENSMUST00000156785;ENSMUST00000106704	GO:0004871(signal transducer activity);GO:0005096(GTPase activator activity);GO:0005515(protein binding);GO:0032403(protein complex binding);GO:0007186(G-protein coupled receptor signaling pathway);GO:0007212(dopamine receptor signaling pathway);GO:0007399(nervous system development);GO:0007601(visual perception);GO:0008277(regulation of G-protein coupled receptor protein signaling pathway);GO:00…	04744(Phototransduction);05030(Cocaine addiction);05030(Cocaine addiction)			regulator of G-protein signaling 9 [Source:MGI Symbol;Acc:MGI:1338824]	0.11	0.09	-0.0262315	0.757724	-0.0263948	0.978942	1	DOWN	No	No
ENSMUSG00000020607	Fam84a	ENSMUST00000020926					family with sequence similarity 84, member A [Source:MGI Symbol;Acc:MGI:2145011]	0.02	0.02	0	0.757724	0	1	1		No	No
ENSMUSG00000020609	Apob	ENSMUST00000037811	GO:0006869(lipid transport);GO:0005319(lipid transporter activity);GO:0070971(endoplasmic reticulum exit site);GO:0070062(extracellular exosome);GO:0043231(intracellular membrane-bounded organelle);GO:0043025(neuronal cell body);GO:0042627(chylomicron);GO:0034363(intermediate-density lipoprotein particle);GO:0034362(low-density lipoprotein particle);GO:0034361(very-low-density lipoprotein particl…	04975(Fat digestion and absorption);04977(Vitamin digestion and absorption)			apolipoprotein B [Source:MGI Symbol;Acc:MGI:88052]	0.02	0	-0.0285692	0.757724	-0.0263948	0.978942	1	DOWN	No	No
ENSMUSG00000020622	Nt5c1b	ENSMUST00000147323;ENSMUST00000218026;ENSMUST00000220257	GO:0000166(nucleotide binding);GO:0000287(magnesium ion binding);GO:0008253(5'-nucleotidase activity);GO:0016787(hydrolase activity);GO:0009116(nucleoside metabolic process);GO:0009117(nucleotide metabolic process);GO:0016311(dephosphorylation);GO:0046085(adenosine metabolic process);GO:0005634(nucleus);GO:0005737(cytoplasm);GO:0005829(cytosol);GO:0005829(cytosol)	00230(Purine metabolism);00240(Pyrimidine metabolism);00760(Nicotinate and nicotinamide metabolism);00760(Nicotinate and nicotinamide metabolism)	K08693	EC:3.1.3.5	5'-nucleotidase, cytosolic IB [Source:MGI Symbol;Acc:MGI:1918131]	0.08	0.03	-0.068387	0.757724	-0.065987	0.947388	1	DOWN	No	No
ENSMUSG00000020627	Klhl29	ENSMUST00000020958	GO:0004842(ubiquitin-protein transferase activity);GO:0042787(protein ubiquitination involved in ubiquitin-dependent protein catabolic process);GO:0031463(Cul3-RING ubiquitin ligase complex)				kelch-like 29 [Source:MGI Symbol;Acc:MGI:2683857]	0.16	0.09	-0.0897967	0.757724	-0.0923819	0.926395	1	DOWN	No	No
ENSMUSG00000020633	Dcdc2c	ENSMUST00000189735;ENSMUST00000186301;ENSMUST00000189747	GO:0003674(molecular_function);GO:0008150(biological_process);GO:0035556(intracellular signal transduction);GO:0005575(cellular_component);GO:0005622(intracellular);GO:0005622(intracellular)				doublecortin domain containing 2C [Source:MGI Symbol;Acc:MGI:1915761]	0.39	0.3	-0.0965733	0.757724	-0.118777	0.905452	1	DOWN	No	No
ENSMUSG00000020636	Allc	ENSMUST00000020965	GO:0004037(allantoicase activity);GO:0016787(hydrolase activity);GO:0000255(allantoin metabolic process);GO:0000256(allantoin catabolic process);GO:0005575(cellular_component)	00230(Purine metabolism)	K01477	EC:3.5.3.4	allantoicase [Source:MGI Symbol;Acc:MGI:2136971]	0.11	0	-0.15056	0.757724	-0.145172	0.884575	1	DOWN	No	No
ENSMUSG00000020646	Mboat2	ENSMUST00000078902;ENSMUST00000110942	GO:0003674(molecular_function);GO:0016740(transferase activity);GO:0016746(transferase activity, transferring acyl groups);GO:0047184(1-acylglycerophosphocholine O-acyltransferase activity);GO:0006629(lipid metabolic process);GO:0006644(phospholipid metabolic process);GO:0008150(biological_process);GO:0008654(phospholipid biosynthetic process);GO:0005575(cellular_component);GO:0005783(endoplasmic…	00561(Glycerolipid metabolism);00564(Glycerophospholipid metabolism);00564(Glycerophospholipid metabolism)			membrane bound O-acyltransferase domain containing 2 [Source:MGI Symbol;Acc:MGI:1914466]	0.1	0.06	-0.0534393	0.757724	-0.0527896	0.9579	1	DOWN	No	No
ENSMUSG00000020651	Slc26a4	ENSMUST00000001253	GO:0005254(chloride channel activity);GO:0008271(secondary active sulfate transmembrane transporter activity);GO:0008509(anion transmembrane transporter activity);GO:0015106(bicarbonate transmembrane transporter activity);GO:0015108(chloride transmembrane transporter activity);GO:0015111(iodide transmembrane transporter activity);GO:0015116(sulfate transmembrane transporter activity);GO:0015301(a…	04918(Thyroid hormone synthesis)			solute carrier family 26, member 4 [Source:MGI Symbol;Acc:MGI:1346029]	0.02	0.01	-0.0142139	0.757724	-0.0131974	0.98947	1	DOWN	No	No
ENSMUSG00000020660	Pomc	ENSMUST00000219543	GO:0001664(G-protein coupled receptor binding);GO:0005102(receptor binding);GO:0005179(hormone activity);GO:0031781(type 3 melanocortin receptor binding);GO:0031782(type 4 melanocortin receptor binding);GO:0070996(type 1 melanocortin receptor binding);GO:0006091(generation of precursor metabolites and energy);GO:0007165(signal transduction);GO:0007218(neuropeptide signaling pathway);GO:0007267(ce…	04080(Neuroactive ligand-receptor interaction);04916(Melanogenesis);04920(Adipocytokine signaling pathway)			pro-opiomelanocortin-alpha [Source:MGI Symbol;Acc:MGI:97742]	0.22	0.29	0.0804899	0.757724	0.0923819	0.926395	1	UP	No	No
ENSMUSG00000020672	Sntg2	ENSMUST00000021004;ENSMUST00000130062	GO:0005198(structural molecule activity);GO:0003779(actin binding);GO:0030165(PDZ domain binding);GO:0097109(neuroligin family protein binding);GO:0005737(cytoplasm);GO:0005856(cytoskeleton);GO:0005886(plasma membrane);GO:0016020(membrane);GO:0042383(sarcolemma);GO:0042383(sarcolemma)				syntrophin, gamma 2 [Source:MGI Symbol;Acc:MGI:1919541]	0.03	0.04	0.0139392	0.757724	0.0131974	0.98947	1	UP	No	No
ENSMUSG00000020684	Rasl10b	ENSMUST00000164425	GO:0000166(nucleotide binding);GO:0005515(protein binding);GO:0005525(GTP binding);GO:0003050(regulation of systemic arterial blood pressure by atrial natriuretic peptide);GO:0007165(signal transduction);GO:0007264(small GTPase mediated signal transduction);GO:0090277(positive regulation of peptide hormone secretion);GO:0005575(cellular_component);GO:0005622(intracellular);GO:0005886(plasma membr…				RAS-like, family 10, member B [Source:MGI Symbol;Acc:MGI:2685575]	0	0.01	0.0143553	0.757724	0.0131974	0.98947	1	UP	No	No
ENSMUSG00000020698	Cct6b	ENSMUST00000021040;ENSMUST00000100722	GO:0000166(nucleotide binding);GO:0005524(ATP binding);GO:0051082(unfolded protein binding);GO:0006457(protein folding);GO:0005737(cytoplasm);GO:0005829(cytosol);GO:0044183(protein binding involved in protein folding);GO:0006458('de novo' protein folding);GO:0061077(chaperone-mediated protein folding);GO:1901998(toxin transport);GO:0005832(chaperonin-containing T-complex);GO:0005832(chaperonin-co…				chaperonin containing Tcp1, subunit 6b (zeta) [Source:MGI Symbol;Acc:MGI:1329013]	0.02	0.14	0.160465	0.757724	0.158369	0.874166	1	UP	No	No
ENSMUSG00000020701	Tmem132e	ENSMUST00000054245	GO:0003674(molecular_function);GO:0008150(biological_process);GO:0016020(membrane);GO:0016021(integral component of membrane)				transmembrane protein 132E [Source:MGI Symbol;Acc:MGI:2685490]	0.01	0.01	0	0.757724	0	1	1		No	No
ENSMUSG00000020702	Ccl1	ENSMUST00000108189;ENSMUST00000138333;ENSMUST00000021043	GO:0005125(cytokine activity);GO:0005515(protein binding);GO:0008009(chemokine activity);GO:0048020(CCR chemokine receptor binding);GO:0002548(monocyte chemotaxis);GO:0006935(chemotaxis);GO:0006954(inflammatory response);GO:0006955(immune response);GO:0007186(G-protein coupled receptor signaling pathway);GO:0030593(neutrophil chemotaxis);GO:0043547(positive regulation of GTPase activity);GO:00482…	04060(Cytokine-cytokine receptor interaction);04062(Chemokine signaling pathway);04062(Chemokine signaling pathway)			chemokine (C-C motif) ligand 1 [Source:MGI Symbol;Acc:MGI:98258]	0.06	0.13	0.0922585	0.757724	0.0923819	0.926395	1	UP	No	No
ENSMUSG00000020712	Tcam1	ENSMUST00000142472;ENSMUST00000044462	GO:0016337(single organismal cell-cell adhesion);GO:0005887(integral component of plasma membrane);GO:0016020(membrane);GO:0005178(integrin binding);GO:0007155(cell adhesion);GO:0016021(integral component of membrane);GO:0016021(integral component of membrane)				testicular cell adhesion molecule 1 [Source:MGI Symbol;Acc:MGI:1923120]	0.62	0.52	-0.0919225	0.757724	-0.131974	0.895005	1	DOWN	No	No
ENSMUSG00000020723	Cacng4	ENSMUST00000021066	GO:0032281(AMPA glutamate receptor complex);GO:0016021(integral component of membrane);GO:0016020(membrane);GO:0005891(voltage-gated calcium channel complex);GO:2000311(regulation of AMPA receptor activity);GO:0070588(calcium ion transmembrane transport);GO:0034765(regulation of ion transmembrane transport);GO:0006816(calcium ion transport);GO:0006811(ion transport);GO:0006810(transport);GO:00052…	04010(MAPK signaling pathway);04260(Cardiac muscle contraction);04261(Adrenergic signaling in cardiomyocytes);04921(Oxytocin signaling pathway);05410(Hypertrophic cardiomyopathy (HCM));05412(Arrhythmogenic right ventricular cardiomyopathy (ARVC));05414(Dilated cardiomyopathy (DCM))			calcium channel, voltage-dependent, gamma subunit 4 [Source:MGI Symbol;Acc:MGI:1859167]	0.02	0	-0.0285692	0.757724	-0.0263948	0.978942	1	DOWN	No	No
ENSMUSG00000020734	Grin2c	ENSMUST00000106554	GO:0045211(postsynaptic membrane);GO:0045202(synapse);GO:0030054(cell junction);GO:0016021(integral component of membrane);GO:0016020(membrane);GO:0005886(plasma membrane);GO:0098655(cation transmembrane transport);GO:0035235(ionotropic glutamate receptor signaling pathway);GO:0034765(regulation of ion transmembrane transport);GO:0034220(ion transmembrane transport);GO:0006811(ion transport);GO:0…	04020(Calcium signaling pathway);04024(cAMP signaling pathway);04080(Neuroactive ligand-receptor interaction);04713(Circadian entrainment);04720(Long-term potentiation);04724(Glutamatergic synapse);05010(Alzheimer's disease);05014(Amyotrophic lateral sclerosis (ALS));05030(Cocaine addiction);05031(Amphetamine addiction);05033(Nicotine addiction);05034(Alcoholism)			glutamate receptor, ionotropic, NMDA2C (epsilon 3) [Source:MGI Symbol;Acc:MGI:95822]	0	0.01	0.0143553	0.757724	0.0131974	0.98947	1	UP	No	No
ENSMUSG00000020782	Llgl2	ENSMUST00000103032;ENSMUST00000177736;ENSMUST00000137951;ENSMUST00000128826;ENSMUST00000147878;ENSMUST00000132999	GO:0005096(GTPase activator activity);GO:0017137(Rab GTPase binding);GO:0030165(PDZ domain binding);GO:0001890(placenta development);GO:0006887(exocytosis);GO:0007049(cell cycle);GO:0009791(post-embryonic development);GO:0016332(establishment or maintenance of polarity of embryonic epithelium);GO:0017157(regulation of exocytosis);GO:0032878(regulation of establishment or maintenance of cell polar…	04390(Hippo signaling pathway);04530(Tight junction);04530(Tight junction)			lethal giant larvae homolog 2 (Drosophila) [Source:MGI Symbol;Acc:MGI:1918843]	0.36	0.33	-0.0321804	0.757724	-0.0395922	0.968418	1	DOWN	No	No
ENSMUSG00000020787	P2rx1	ENSMUST00000021141;ENSMUST00000148964	GO:0001614(purinergic nucleotide receptor activity);GO:0004931(extracellular ATP-gated cation channel activity);GO:0005216(ion channel activity);GO:0005261(cation channel activity);GO:0005524(ATP binding);GO:0008144(drug binding);GO:0008270(zinc ion binding);GO:0002554(serotonin secretion by platelet);GO:0003056(regulation of vascular smooth muscle contraction);GO:0006810(transport);GO:0006811(io…	04020(Calcium signaling pathway);04080(Neuroactive ligand-receptor interaction);04611(Platelet activation);04611(Platelet activation)			purinergic receptor P2X, ligand-gated ion channel, 1 [Source:MGI Symbol;Acc:MGI:1098235]	0.28	0.14	-0.16711	0.757724	-0.184764	0.853414	1	DOWN	No	No
ENSMUSG00000020798	Spns3	ENSMUST00000155774;ENSMUST00000092940;ENSMUST00000021154	GO:0046624(sphingolipid transporter activity);GO:0003376(sphingosine-1-phosphate signaling pathway);GO:0006810(transport);GO:0006869(lipid transport);GO:0040011(locomotion);GO:0055085(transmembrane transport);GO:0005765(lysosomal membrane);GO:0016020(membrane);GO:0016021(integral component of membrane);GO:0031982(vesicle);GO:0031982(vesicle)				spinster homolog 3 [Source:MGI Symbol;Acc:MGI:1924827]	0.44	0.65	0.196397	0.757724	0.277146	0.781668	1	UP	No	No
ENSMUSG00000020804	Aanat	ENSMUST00000021160;ENSMUST00000153476	GO:0004059(aralkylamine N-acetyltransferase activity);GO:0016740(transferase activity);GO:0016746(transferase activity, transferring acyl groups);GO:0004060(arylamine N-acetyltransferase activity);GO:0008080(N-acetyltransferase activity);GO:0071889(14-3-3 protein binding);GO:0006474(N-terminal protein amino acid acetylation);GO:0007623(circadian rhythm);GO:0009416(response to light stimulus);GO:0…	00380(Tryptophan metabolism);00380(Tryptophan metabolism)			arylalkylamine N-acetyltransferase [Source:MGI Symbol;Acc:MGI:1328365]	0.02	0	-0.0285692	0.757724	-0.0263948	0.978942	1	DOWN	No	No
ENSMUSG00000020811	Wscd1	ENSMUST00000108511;ENSMUST00000108510	GO:0003674(molecular_function);GO:0008146(sulfotransferase activity);GO:0008150(biological_process);GO:0005575(cellular_component);GO:0016020(membrane);GO:0016021(integral component of membrane);GO:0016021(integral component of membrane)				WSC domain containing 1 [Source:MGI Symbol;Acc:MGI:2448493]	0.2	0.18	-0.0242475	0.757724	-0.0263948	0.978942	1	DOWN	No	No
ENSMUSG00000020838	Slc6a4	ENSMUST00000108402;ENSMUST00000137819	GO:0005328(neurotransmitter:sodium symporter activity);GO:0005330(dopamine:sodium symporter activity);GO:0005335(serotonin:sodium symporter activity);GO:0005515(protein binding);GO:0008504(monoamine transmembrane transporter activity);GO:0015222(serotonin transmembrane transporter activity);GO:0015293(symporter activity);GO:0017022(myosin binding);GO:0017075(syntaxin-1 binding);GO:0017137(Rab GTP…	04726(Serotonergic synapse);04726(Serotonergic synapse)			solute carrier family 6 (neurotransmitter transporter, serotonin), member 4 [Source:MGI Symbol;Acc:MGI:96285]	0.1	0.13	0.0388192	0.757724	0.0395922	0.968418	1	UP	No	No
ENSMUSG00000020847	Rph3al	ENSMUST00000121287;ENSMUST00000066504;ENSMUST00000021208;ENSMUST00000108420	GO:0005509(calcium ion binding);GO:0005515(protein binding);GO:0005544(calcium-dependent phospholipid binding);GO:0017137(Rab GTPase binding);GO:0030274(LIM domain binding);GO:0046872(metal ion binding);GO:0006886(intracellular protein transport);GO:0006887(exocytosis);GO:0017157(regulation of exocytosis);GO:0017158(regulation of calcium ion-dependent exocytosis);GO:0042493(response to drug);GO:0…				rabphilin 3A-like (without C2 domains) [Source:MGI Symbol;Acc:MGI:1923492]	0.02	0.04	0.0280144	0.757724	0.0263948	0.978942	1	UP	No	No
ENSMUSG00000020848	Doc2b	ENSMUST00000021209	GO:0031201(SNARE complex);GO:0005509(calcium ion binding);GO:0005515(protein binding);GO:0005544(calcium-dependent phospholipid binding);GO:0019905(syntaxin binding);GO:0030276(clathrin binding);GO:0006906(vesicle fusion);GO:0008104(protein localization);GO:0017158(regulation of calcium ion-dependent exocytosis);GO:0031340(positive regulation of vesicle fusion);GO:0032024(positive regulation of i…				double C2, beta [Source:MGI Symbol;Acc:MGI:1100497]	0	0.03	0.0426443	0.757724	0.0395922	0.968418	1	UP	No	No
ENSMUSG00000020870	Cdc34b	ENSMUST00000021240;ENSMUST00000188741	GO:0005524(ATP binding);GO:0000166(nucleotide binding);GO:0005737(cytoplasm);GO:0043161(proteasome-mediated ubiquitin-dependent protein catabolic process);GO:0016567(protein ubiquitination);GO:0061630(ubiquitin protein ligase activity);GO:0031625(ubiquitin protein ligase binding);GO:0031625(ubiquitin protein ligase binding)				cell division cycle 34B [Source:MGI Symbol;Acc:MGI:1858429]	0	0.1	0.137504	0.757724	0.131974	0.895005	1	UP	No	No
ENSMUSG00000020875	Hoxb9	ENSMUST00000000010	GO:0003677(DNA binding);GO:0043565(sequence-specific DNA binding);GO:0006351(transcription, DNA-templated);GO:0006355(regulation of transcription, DNA-templated);GO:0007275(multicellular organism development);GO:0009952(anterior/posterior pattern specification);GO:0030879(mammary gland development);GO:0045944(positive regulation of transcription from RNA polymerase II promoter);GO:0048706(embryon…				homeobox B9 [Source:MGI Symbol;Acc:MGI:96190]	0.21	0.08	-0.163976	0.757724	-0.171566	0.863778	1	DOWN	No	No
ENSMUSG00000020887	A230052G05Rik	ENSMUST00000050921					RIKEN cDNA A230052G05 gene [Source:MGI Symbol;Acc:MGI:3045239]	0	0	0	0.757724	0				No	No
ENSMUSG00000020891	Alox8	ENSMUST00000021262	GO:0005506(iron ion binding);GO:0005509(calcium ion binding);GO:0008289(lipid binding);GO:0016165(linoleate 13S-lipoxygenase activity);GO:0016491(oxidoreductase activity);GO:0016702(oxidoreductase activity, acting on single donors with incorporation of molecular oxygen, incorporation of two atoms of oxygen);GO:0036403(arachidonate 8(S)-lipoxygenase activity);GO:0046872(metal ion binding);GO:00504…	00590(Arachidonic acid metabolism);04726(Serotonergic synapse)			arachidonate 8-lipoxygenase [Source:MGI Symbol;Acc:MGI:1098228]	0.02	0	-0.0285692	0.757724	-0.0263948	0.978942	1	DOWN	No	No
ENSMUSG00000020892	Aloxe3	ENSMUST00000021268;ENSMUST00000155324;ENSMUST00000139257	GO:0003824(catalytic activity);GO:0005506(iron ion binding);GO:0016491(oxidoreductase activity);GO:0016702(oxidoreductase activity, acting on single donors with incorporation of molecular oxygen, incorporation of two atoms of oxygen);GO:0016829(lyase activity);GO:0016853(isomerase activity);GO:0046872(metal ion binding);GO:0051120(hepoxilin A3 synthase activity);GO:0051213(dioxygenase activity);G…				arachidonate lipoxygenase 3 [Source:MGI Symbol;Acc:MGI:1345140]	0.16	0.07	-0.116514	0.757724	-0.118777	0.905452	1	DOWN	No	No
ENSMUSG00000020926	Adam11	ENSMUST00000068150;ENSMUST00000142912;ENSMUST00000134296	GO:0004222(metalloendopeptidase activity);GO:0005515(protein binding);GO:0008237(metallopeptidase activity);GO:0006508(proteolysis);GO:0016020(membrane);GO:0016021(integral component of membrane);GO:0007229(integrin-mediated signaling pathway);GO:0007229(integrin-mediated signaling pathway)				a disintegrin and metallopeptidase domain 11 [Source:MGI Symbol;Acc:MGI:1098667]	0.16	0.09	-0.0897967	0.757724	-0.0923819	0.926395	1	DOWN	No	No
ENSMUSG00000020940	1700023F06Rik	ENSMUST00000021323	GO:0005575(cellular_component);GO:0008150(biological_process);GO:0005509(calcium ion binding);GO:0003674(molecular_function)				RIKEN cDNA 1700023F06 gene [Source:MGI Symbol;Acc:MGI:1916691]	0.04	0.02	-0.0280144	0.757724	-0.0263948	0.978942	1	DOWN	No	No
ENSMUSG00000020961	Ston2	ENSMUST00000052969;ENSMUST00000170077;ENSMUST00000166967;ENSMUST00000166008	GO:0005515(protein binding);GO:0002244(hematopoietic progenitor cell differentiation);GO:0006897(endocytosis);GO:0007268(chemical synaptic transmission);GO:0030100(regulation of endocytosis);GO:0036465(synaptic vesicle recycling);GO:0048488(synaptic vesicle endocytosis);GO:0005730(nucleolus);GO:0005737(cytoplasm);GO:0005829(cytosol);GO:0008021(synaptic vesicle);GO:0016020(membrane);GO:0030054(cel…				stonin 2 [Source:MGI Symbol;Acc:MGI:1918272]	0.06	0.11	0.0664954	0.757724	0.065987	0.947388	1	UP	No	No
ENSMUSG00000021010	Npas3	ENSMUST00000101432	GO:0005829(cytosol);GO:0005654(nucleoplasm);GO:0005634(nucleus);GO:0006355(regulation of transcription, DNA-templated);GO:0006351(transcription, DNA-templated);GO:0046983(protein dimerization activity)				neuronal PAS domain protein 3 [Source:MGI Symbol;Acc:MGI:1351610]	0.12	0.11	-0.0129391	0.757724	-0.0131974	0.98947	1	DOWN	No	No
ENSMUSG00000021032	Ngb	ENSMUST00000021420	GO:0005344(oxygen transporter activity);GO:0019825(oxygen binding);GO:0020037(heme binding);GO:0046872(metal ion binding);GO:0006810(transport);GO:0015671(oxygen transport);GO:0005515(protein binding);GO:0006915(apoptotic process);GO:0005737(cytoplasm);GO:0005739(mitochondrion);GO:0043204(perikaryon)				neuroglobin [Source:MGI Symbol;Acc:MGI:2151886]	0.19	0.19	0	0.757724	0	1	1		No	No
ENSMUSG00000021055	Esr2	ENSMUST00000101291	GO:0005634(nucleus);GO:0043401(steroid hormone mediated signaling pathway);GO:0030520(intracellular estrogen receptor signaling pathway);GO:0006355(regulation of transcription, DNA-templated);GO:0006351(transcription, DNA-templated);GO:0046872(metal ion binding);GO:0043565(sequence-specific DNA binding);GO:0030284(estrogen receptor activity);GO:0008270(zinc ion binding);GO:0005496(steroid binding…	04915(Estrogen signaling pathway);04917(Prolactin signaling pathway)			estrogen receptor 2 (beta) [Source:MGI Symbol;Acc:MGI:109392]	0.09	0.01	-0.109973	0.757724	-0.105579	0.915916	1	DOWN	No	No
ENSMUSG00000021057	Akap5	ENSMUST00000095610;ENSMUST00000172992	GO:0007165(signal transduction);GO:0006605(protein targeting);GO:0016020(membrane);GO:0005886(plasma membrane);GO:0005856(cytoskeleton);GO:0036394(amylase secretion);GO:0030819(positive regulation of cAMP biosynthetic process);GO:0010739(positive regulation of protein kinase A signaling);GO:0034237(protein kinase A regulatory subunit binding);GO:0008179(adenylate cyclase binding);GO:0005516(calmo…				A kinase (PRKA) anchor protein 5 [Source:MGI Symbol;Acc:MGI:2685104]	0.1	0.04	-0.08092	0.757724	-0.0791845	0.936886	1	DOWN	No	No
ENSMUSG00000021070	Bdkrb2	ENSMUST00000001652	GO:0002020(protease binding);GO:0004871(signal transducer activity);GO:0004930(G-protein coupled receptor activity);GO:0004947(bradykinin receptor activity);GO:0031702(type 1 angiotensin receptor binding);GO:0046982(protein heterodimerization activity);GO:0006939(smooth muscle contraction);GO:0006950(response to stress);GO:0007165(signal transduction);GO:0007186(G-protein coupled receptor signali…	04020(Calcium signaling pathway);04022(cGMP - PKG signaling pathway);04071(Sphingolipid signaling pathway);04080(Neuroactive ligand-receptor interaction);04610(Complement and coagulation cascades);04750(Inflammatory mediator regulation of TRP channels);04810(Regulation of actin cytoskeleton);04961(Endocrine and other factor-regulated calcium reabsorption);05142(Chagas disease (American trypanosom…			bradykinin receptor, beta 2 [Source:MGI Symbol;Acc:MGI:102845]	0.18	2.23	1.45275	0.757724	2.70547	0.0068208	0.0227115	UP	Yes	Yes
ENSMUSG00000021071	Trim9	ENSMUST00000110522	GO:0030425(dendrite);GO:0008021(synaptic vesicle);GO:0005856(cytoskeleton);GO:0005829(cytosol);GO:0005737(cytoplasm);GO:0005622(intracellular);GO:0045955(negative regulation of calcium ion-dependent exocytosis);GO:0043161(proteasome-mediated ubiquitin-dependent protein catabolic process);GO:0035544(negative regulation of SNARE complex assembly);GO:0016567(protein ubiquitination);GO:0016079(synapt…				tripartite motif-containing 9 [Source:MGI Symbol;Acc:MGI:2137354]	0.01	0	-0.0143553	0.757724	-0.0131974	0.98947	1	DOWN	No	No
ENSMUSG00000021087	Rtn1	ENSMUST00000150156;ENSMUST00000078505	GO:0005783(endoplasmic reticulum);GO:0005789(endoplasmic reticulum membrane);GO:0016020(membrane);GO:0016021(integral component of membrane);GO:0008150(biological_process);GO:0005790(smooth endoplasmic reticulum);GO:0005790(smooth endoplasmic reticulum)				reticulon 1 [Source:MGI Symbol;Acc:MGI:1933947]	0.35	0.17	-0.206451	0.757724	-0.237553	0.812228	1	DOWN	No	No
ENSMUSG00000021095	Gsc	ENSMUST00000021513	GO:0000978(RNA polymerase II core promoter proximal region sequence-specific DNA binding);GO:0001078(transcriptional repressor activity, RNA polymerase II core promoter proximal region sequence-specific binding);GO:0001085(RNA polymerase II transcription factor binding);GO:0001103(RNA polymerase II repressing transcription factor binding);GO:0003677(DNA binding);GO:0005515(protein binding);GO:004…				goosecoid homeobox [Source:MGI Symbol;Acc:MGI:95841]	0	0.07	0.0976108	0.757724	0.0923819	0.926395	1	UP	No	No
ENSMUSG00000021098	4930447C04Rik	ENSMUST00000110489;ENSMUST00000044000;ENSMUST00000143960;ENSMUST00000131033;ENSMUST00000136075	GO:0003674(molecular_function);GO:0006310(DNA recombination);GO:0007129(synapsis);GO:0007275(multicellular organism development);GO:0007283(spermatogenesis);GO:0010705(meiotic DNA double-strand break processing involved in reciprocal meiotic recombination);GO:0048477(oogenesis);GO:0051090(regulation of sequence-specific DNA binding transcription factor activity);GO:0051321(meiotic cell cycle);GO:…				RIKEN cDNA 4930447C04 gene [Source:MGI Symbol;Acc:MGI:1923051]	0	0.01	0.0143553	0.757724	0.0131974	0.98947	1	UP	No	No
ENSMUSG00000021135	Slc10a1	ENSMUST00000218162;ENSMUST00000218342	GO:0008508(bile acid:sodium symporter activity);GO:0015721(bile acid and bile salt transport);GO:0016020(membrane);GO:0016021(integral component of membrane);GO:0015293(symporter activity);GO:0006810(transport);GO:0006811(ion transport);GO:0006814(sodium ion transport);GO:0055085(transmembrane transport);GO:0055085(transmembrane transport)	04976(Bile secretion);04976(Bile secretion)			solute carrier family 10 (sodium/bile acid cotransporter family), member 1 [Source:MGI Symbol;Acc:MGI:97379]	0.07	0.02	-0.0690416	0.757724	-0.065987	0.947388	1	DOWN	No	No
ENSMUSG00000021198	Unc79	ENSMUST00000101099;ENSMUST00000179002	GO:0005515(protein binding);GO:0030534(adult behavior);GO:0035264(multicellular organism growth);GO:0048149(behavioral response to ethanol);GO:0005575(cellular_component);GO:0016020(membrane);GO:0016021(integral component of membrane);GO:0016021(integral component of membrane)				unc-79 homolog (C. elegans) [Source:MGI Symbol;Acc:MGI:2684729]	0.01	0	-0.0143553	0.757724	-0.0131974	0.98947	1	DOWN	No	No
ENSMUSG00000021207	Akr1c21	ENSMUST00000021628;ENSMUST00000137279	GO:0004032(alditol:NADP+ 1-oxidoreductase activity);GO:0004033(aldo-keto reductase (NADP) activity);GO:0016491(oxidoreductase activity);GO:0016655(oxidoreductase activity, acting on NAD(P)H, quinone or similar compound as acceptor);GO:0018636(phenanthrene 9,10-monooxygenase activity);GO:0031406(carboxylic acid binding);GO:0032052(bile acid binding);GO:0033764(steroid dehydrogenase activity, actin…				aldo-keto reductase family 1, member C21 [Source:MGI Symbol;Acc:MGI:1924587]	0.11	0.07	-0.0529489	0.757724	-0.0527896	0.9579	1	DOWN	No	No
ENSMUSG00000021208	Ifi27l2b	ENSMUST00000044687	GO:0003674(molecular_function);GO:0008150(biological_process);GO:0005575(cellular_component);GO:0016020(membrane);GO:0016021(integral component of membrane)				interferon, alpha-inducible protein 27 like 2B [Source:MGI Symbol;Acc:MGI:1916390]	0	0	0	0.757724	0				No	No
ENSMUSG00000021209	Ppp4r4	ENSMUST00000021631	GO:0005515(protein binding);GO:0019888(protein phosphatase regulator activity);GO:0032515(negative regulation of phosphoprotein phosphatase activity);GO:0080163(regulation of protein serine/threonine phosphatase activity);GO:0005737(cytoplasm);GO:0005829(cytosol);GO:0008287(protein serine/threonine phosphatase complex)				protein phosphatase 4, regulatory subunit 4 [Source:MGI Symbol;Acc:MGI:1921771]	0.21	0.19	-0.0240455	0.757724	-0.0263948	0.978942	1	DOWN	No	No
ENSMUSG00000021219	Rgs6	ENSMUST00000186458	GO:0005622(intracellular);GO:0035556(intracellular signal transduction);GO:0005834(heterotrimeric G-protein complex);GO:0007186(G-protein coupled receptor signaling pathway);GO:0004871(signal transducer activity);GO:0019898(extrinsic component of membrane);GO:0005829(cytosol);GO:0043547(positive regulation of GTPase activity);GO:0005096(GTPase activator activity);GO:0005515(protein binding);GO:00…				regulator of G-protein signaling 6 [Source:MGI Symbol;Acc:MGI:1354730]	0.01	0	-0.0143553	0.757724	-0.0131974	0.98947	1	DOWN	No	No
ENSMUSG00000021221	Dpf3	ENSMUST00000178756;ENSMUST00000140327;ENSMUST00000144237	GO:0046872(metal ion binding);GO:0008270(zinc ion binding);GO:0003676(nucleic acid binding);GO:0006351(transcription, DNA-templated);GO:0006355(regulation of transcription, DNA-templated);GO:0007399(nervous system development);GO:0016569(covalent chromatin modification);GO:0005634(nucleus);GO:0005654(nucleoplasm);GO:0071565(nBAF complex);GO:0071565(nBAF complex)				D4, zinc and double PHD fingers, family 3 [Source:MGI Symbol;Acc:MGI:1917377]	0.09	0.02	-0.095759	0.757724	-0.0923819	0.926395	1	DOWN	No	No
ENSMUSG00000021255	Esrrb	ENSMUST00000116402;ENSMUST00000110203;ENSMUST00000110204;ENSMUST00000021680;ENSMUST00000167891	GO:0005634(nucleus);GO:0043401(steroid hormone mediated signaling pathway);GO:0006355(regulation of transcription, DNA-templated);GO:0006351(transcription, DNA-templated);GO:0046872(metal ion binding);GO:0043565(sequence-specific DNA binding);GO:0008270(zinc ion binding);GO:0005496(steroid binding);GO:0003707(steroid hormone receptor activity);GO:0003700(transcription factor activity, sequence-sp…	04550(Signaling pathways regulating pluripotency of stem cells);04550(Signaling pathways regulating pluripotency of stem cells)			estrogen related receptor, beta [Source:MGI Symbol;Acc:MGI:1346832]	0.16	0.05	-0.143735	0.757724	-0.145172	0.884575	1	DOWN	No	No
ENSMUSG00000021259	Cyp46a1	ENSMUST00000021684	GO:0004497(monooxygenase activity);GO:0005506(iron ion binding);GO:0016491(oxidoreductase activity);GO:0016705(oxidoreductase activity, acting on paired donors, with incorporation or reduction of molecular oxygen);GO:0020037(heme binding);GO:0033781(cholesterol 24-hydroxylase activity);GO:0046872(metal ion binding);GO:0006707(cholesterol catabolic process);GO:0006805(xenobiotic metabolic process)…	00120(Primary bile acid biosynthesis)			cytochrome P450, family 46, subfamily a, polypeptide 1 [Source:MGI Symbol;Acc:MGI:1341877]	1.29	0.46	-0.649379	0.757724	-1.09538	0.273348	0.620452	DOWN	No	No
ENSMUSG00000021278	Amn	ENSMUST00000021707	GO:0005102(receptor binding);GO:0006810(transport);GO:0006898(receptor-mediated endocytosis);GO:0007275(multicellular organism development);GO:0007588(excretion);GO:0008104(protein localization);GO:0015031(protein transport);GO:0015889(cobalamin transport);GO:0043001(Golgi to plasma membrane protein transport);GO:0005615(extracellular space);GO:0005768(endosome);GO:0005886(plasma membrane);GO:000…				amnionless [Source:MGI Symbol;Acc:MGI:1934943]	0.09	0.11	0.0262315	0.757724	0.0263948	0.978942	1	UP	No	No
ENSMUSG00000021303	Gng4	ENSMUST00000021734	GO:0003924(GTPase activity);GO:0004871(signal transducer activity);GO:0007165(signal transduction);GO:0007186(G-protein coupled receptor signaling pathway);GO:0030308(negative regulation of cell growth);GO:0005834(heterotrimeric G-protein complex);GO:0005886(plasma membrane);GO:0016020(membrane);GO:0070062(extracellular exosome)	04014(Ras signaling pathway);04062(Chemokine signaling pathway);04151(PI3K-Akt signaling pathway);04713(Circadian entrainment);04723(Retrograde endocannabinoid signaling);04724(Glutamatergic synapse);04725(Cholinergic synapse);04726(Serotonergic synapse);04727(GABAergic synapse);04728(Dopaminergic synapse);05032(Morphine addiction);05034(Alcoholism);05200(Pathways in cancer)			guanine nucleotide binding protein (G protein), gamma 4 [Source:MGI Symbol;Acc:MGI:102703]	0.09	0.03	-0.0816838	0.757724	-0.0791845	0.936886	1	DOWN	No	No
ENSMUSG00000021314	Amph	ENSMUST00000200466	GO:0031256(leading edge membrane);GO:0005737(cytoplasm);GO:0005543(phospholipid binding);GO:0005515(protein binding);GO:0007612(learning);GO:0048488(synaptic vesicle endocytosis);GO:0005856(cytoskeleton);GO:0008021(synaptic vesicle);GO:0016020(membrane);GO:0030054(cell junction);GO:0030672(synaptic vesicle membrane);GO:0031410(cytoplasmic vesicle);GO:0045202(synapse)	04666(Fc gamma R-mediated phagocytosis)			amphiphysin [Source:MGI Symbol;Acc:MGI:103574]	0	0.01	0.0143553	0.757724	0.0131974	0.98947	1	UP	No	No
ENSMUSG00000021362	Gcm2	ENSMUST00000021791	GO:0005634(nucleus);GO:0060017(parathyroid gland development);GO:0030643(cellular phosphate ion homeostasis);GO:0007275(multicellular organism development);GO:0006874(cellular calcium ion homeostasis);GO:0006355(regulation of transcription, DNA-templated);GO:0006351(transcription, DNA-templated);GO:0043565(sequence-specific DNA binding);GO:0003677(DNA binding)				glial cells missing homolog 2 (Drosophila) [Source:MGI Symbol;Acc:MGI:1861438]	0	0	0	0.757724	0				No	No
ENSMUSG00000021363	Mak	ENSMUST00000165087	GO:0000166(nucleotide binding);GO:0003713(transcription coactivator activity);GO:0004672(protein kinase activity);GO:0004674(protein serine/threonine kinase activity);GO:0005515(protein binding);GO:0005524(ATP binding);GO:0016301(kinase activity);GO:0016740(transferase activity);GO:0046872(metal ion binding);GO:0006351(transcription, DNA-templated);GO:0006355(regulation of transcription, DNA-temp…				male germ cell-associated kinase [Source:MGI Symbol;Acc:MGI:96913]	0	0	0	0.757724	0				No	No
ENSMUSG00000021379	Id4	ENSMUST00000021810	GO:0001085(RNA polymerase II transcription factor binding);GO:0005515(protein binding);GO:0046983(protein dimerization activity);GO:0000082(G1/S transition of mitotic cell cycle);GO:0000122(negative regulation of transcription from RNA polymerase II promoter);GO:0006351(transcription, DNA-templated);GO:0006355(regulation of transcription, DNA-templated);GO:0007405(neuroblast proliferation);GO:000…	04350(TGF-beta signaling pathway);04550(Signaling pathways regulating pluripotency of stem cells)			inhibitor of DNA binding 4 [Source:MGI Symbol;Acc:MGI:99414]	0.05	0.02	-0.0418202	0.757724	-0.0395922	0.968418	1	DOWN	No	No
ENSMUSG00000021396	Nxnl2	ENSMUST00000021828	GO:0004791(thioredoxin-disulfide reductase activity);GO:0007600(sensory perception);GO:0007601(visual perception);GO:0007608(sensory perception of smell);GO:0045494(photoreceptor cell maintenance);GO:0098869(cellular oxidant detoxification);GO:0005737(cytoplasm)				nucleoredoxin-like 2 [Source:MGI Symbol;Acc:MGI:1922374]	0	0	0	0.757724	0				No	No
ENSMUSG00000021414	Fam217a	ENSMUST00000021851					family with sequence similarity 217, member A [Source:MGI Symbol;Acc:MGI:1919114]	0.02	0.08	0.0824622	0.757724	0.0791845	0.936886	1	UP	No	No
ENSMUSG00000021448	Shc3	ENSMUST00000021898	GO:0005515(protein binding);GO:0030971(receptor tyrosine kinase binding);GO:0007165(signal transduction);GO:0007173(epidermal growth factor receptor signaling pathway);GO:0007417(central nervous system development);GO:0007611(learning or memory);GO:0035249(synaptic transmission, glutamatergic);GO:0035556(intracellular signal transduction);GO:0005622(intracellular);GO:0005886(plasma membrane)	04012(ErbB signaling pathway);04014(Ras signaling pathway);04062(Chemokine signaling pathway);04510(Focal adhesion);04650(Natural killer cell mediated cytotoxicity);04722(Neurotrophin signaling pathway);04910(Insulin signaling pathway);04915(Estrogen signaling pathway);04917(Prolactin signaling pathway);05034(Alcoholism);05100(Bacterial invasion of epithelial cells);05214(Glioma);05220(Chronic my…			src homology 2 domain-containing transforming protein C3 [Source:MGI Symbol;Acc:MGI:106179]	0	0	0	0.757724	0				No	No
ENSMUSG00000021499	Catsper3	ENSMUST00000021961	GO:0016021(integral component of membrane);GO:0016020(membrane);GO:0070588(calcium ion transmembrane transport);GO:0055085(transmembrane transport);GO:0034220(ion transmembrane transport);GO:0006811(ion transport);GO:0005216(ion channel activity);GO:0005244(voltage-gated ion channel activity);GO:0005245(voltage-gated calcium channel activity);GO:0005262(calcium channel activity);GO:0005515(protei…				cation channel, sperm associated 3 [Source:MGI Symbol;Acc:MGI:1924106]	0.02	0	-0.0285692	0.757724	-0.0263948	0.978942	1	DOWN	No	No
ENSMUSG00000021509	Slc25a48	ENSMUST00000021971	GO:0022857(transmembrane transporter activity);GO:0006810(transport);GO:0055085(transmembrane transport);GO:0005739(mitochondrion);GO:0005743(mitochondrial inner membrane);GO:0016020(membrane);GO:0016021(integral component of membrane)				solute carrier family 25, member 48 [Source:MGI Symbol;Acc:MGI:2145373]	0.02	0	-0.0285692	0.757724	-0.0263948	0.978942	1	DOWN	No	No
ENSMUSG00000021534	1700001L19Rik	ENSMUST00000022007	GO:0003674(molecular_function);GO:0008150(biological_process);GO:0005575(cellular_component)				RIKEN cDNA 1700001L19 gene [Source:MGI Symbol;Acc:MGI:1916565]	0.09	0.11	0.0262315	0.757724	0.0263948	0.978942	1	UP	No	No
ENSMUSG00000021539	Lect2	ENSMUST00000062806	GO:0042802(identical protein binding)				leukocyte cell-derived chemotaxin 2 [Source:MGI Symbol;Acc:MGI:1278342]	0.27	0.53	0.268703	0.757724	0.343133	0.731499	1	UP	No	No
ENSMUSG00000021541	Trpc7	ENSMUST00000022023;ENSMUST00000109871	GO:0005216(ion channel activity);GO:0005262(calcium channel activity);GO:0006811(ion transport);GO:0055085(transmembrane transport);GO:0070588(calcium ion transmembrane transport);GO:0005801(cis-Golgi network);GO:0016020(membrane);GO:0016021(integral component of membrane);GO:0048471(perinuclear region of cytoplasm);GO:0015279(store-operated calcium channel activity);GO:0006810(transport);GO:0006…				transient receptor potential cation channel, subfamily C, member 7 [Source:MGI Symbol;Acc:MGI:1349470]	0.02	0.01	-0.0142139	0.757724	-0.0131974	0.98947	1	DOWN	No	No
ENSMUSG00000021553	Slc28a3	ENSMUST00000140760;ENSMUST00000022036	GO:0005337(nucleoside transmembrane transporter activity);GO:0015389(pyrimidine- and adenine-specific:sodium symporter activity);GO:0015390(purine-specific nucleoside:sodium symporter activity);GO:0015855(pyrimidine nucleobase transport);GO:0015860(purine nucleoside transmembrane transport);GO:0015864(pyrimidine nucleoside transport);GO:0072531(pyrimidine-containing compound transmembrane transpo…				solute carrier family 28 (sodium-coupled nucleoside transporter), member 3 [Source:MGI Symbol;Acc:MGI:2137361]	0.04	0	-0.0565835	0.757724	-0.0527896	0.9579	1	DOWN	No	No
ENSMUSG00000021565	Slc6a19	ENSMUST00000022048;ENSMUST00000132085	GO:0005328(neurotransmitter:sodium symporter activity);GO:0015293(symporter activity);GO:0006810(transport);GO:0006836(neurotransmitter transport);GO:0007584(response to nutrient);GO:0055085(transmembrane transport);GO:0005887(integral component of plasma membrane);GO:0016020(membrane);GO:0016021(integral component of membrane);GO:0070062(extracellular exosome);GO:0005515(protein binding);GO:0015…	04974(Protein digestion and absorption);04978(Mineral absorption);04978(Mineral absorption)			solute carrier family 6 (neurotransmitter transporter), member 19 [Source:MGI Symbol;Acc:MGI:1921588]	0	0.05	0.0703893	0.757724	0.065987	0.947388	1	UP	No	No
ENSMUSG00000021567	Nkd2	ENSMUST00000022051;ENSMUST00000138899	GO:0016328(lateral plasma membrane);GO:0005509(calcium ion binding);GO:0019838(growth factor binding);GO:0031625(ubiquitin protein ligase binding);GO:0046872(metal ion binding);GO:0006810(transport);GO:0006887(exocytosis);GO:0010954(positive regulation of protein processing);GO:0016055(Wnt signaling pathway);GO:0030178(negative regulation of Wnt signaling pathway);GO:0032436(positive regulation o…	04310(Wnt signaling pathway);04310(Wnt signaling pathway)			naked cuticle 2 homolog (Drosophila) [Source:MGI Symbol;Acc:MGI:1919543]	0.16	0.06	-0.130061	0.757724	-0.131974	0.895005	1	DOWN	No	No
ENSMUSG00000021575	Ahrr	ENSMUST00000022059;ENSMUST00000148438;ENSMUST00000137538	GO:0005829(cytosol);GO:0005654(nucleoplasm);GO:0005634(nucleus);GO:0006355(regulation of transcription, DNA-templated);GO:0006351(transcription, DNA-templated);GO:0046983(protein dimerization activity);GO:0046983(protein dimerization activity)				aryl-hydrocarbon receptor repressor [Source:MGI Symbol;Acc:MGI:1333776]	0.06	0.03	-0.0414199	0.757724	-0.0395922	0.968418	1	DOWN	No	No
ENSMUSG00000021587	Pcsk1	ENSMUST00000022075	GO:0004175(endopeptidase activity);GO:0004252(serine-type endopeptidase activity);GO:0008233(peptidase activity);GO:0008236(serine-type peptidase activity);GO:0016787(hydrolase activity);GO:0006508(proteolysis);GO:0016485(protein processing);GO:0016486(peptide hormone processing);GO:0032455(nerve growth factor processing);GO:0043043(peptide biosynthetic process);GO:0050796(regulation of insulin s…				proprotein convertase subtilisin/kexin type 1 [Source:MGI Symbol;Acc:MGI:97511]	0	0.01	0.0143553	0.757724	0.0131974	0.98947	1	UP	No	No
ENSMUSG00000021596	Mctp1	ENSMUST00000125209;ENSMUST00000126960;ENSMUST00000109583;ENSMUST00000109589;ENSMUST00000137052;ENSMUST00000122843;ENSMUST00000149028	GO:0016021(integral component of membrane);GO:0016020(membrane);GO:0005783(endoplasmic reticulum);GO:0008150(biological_process);GO:0005509(calcium ion binding);GO:0005509(calcium ion binding)				multiple C2 domains, transmembrane 1 [Source:MGI Symbol;Acc:MGI:1926021]	0.23	0.14	-0.109624	0.757724	-0.118777	0.905452	1	DOWN	No	No
ENSMUSG00000021611	Tert	ENSMUST00000022104	GO:0016605(PML body);GO:0003720(telomerase activity);GO:0003721(telomerase RNA reverse transcriptase activity);GO:0003968(RNA-directed 5'-3' RNA polymerase activity);GO:0000049(tRNA binding);GO:0001223(transcription coactivator binding);GO:0003677(DNA binding);GO:0003723(RNA binding);GO:0003964(RNA-directed DNA polymerase activity);GO:0005515(protein binding);GO:0016740(transferase activity);GO:0…	05166(HTLV-I infection)			telomerase reverse transcriptase [Source:MGI Symbol;Acc:MGI:1202709]	0.53	0.15	-0.411898	0.757724	-0.501502	0.616018	1	DOWN	No	No
ENSMUSG00000021631	Mrps36-ps1	ENSMUST00000061311					mitichondrial ribosomal protein S36, pseudogene 1 [Source:MGI Symbol;Acc:MGI:3809201]	0	0.86	0.895303	0.757724	1.13498	0.256385	0.58885	UP	No	No
ENSMUSG00000021680	Crhbp	ENSMUST00000045583	GO:0051424(corticotropin-releasing hormone binding);GO:0006954(inflammatory response);GO:0007565(female pregnancy);GO:0009755(hormone-mediated signaling pathway);GO:0033554(cellular response to stress);GO:0035865(cellular response to potassium ion);GO:0045055(regulated exocytosis);GO:0048149(behavioral response to ethanol);GO:0051459(regulation of corticotropin secretion);GO:0051460(negative regu…				corticotropin releasing hormone binding protein [Source:MGI Symbol;Acc:MGI:88497]	0.1	0.03	-0.0948592	0.757724	-0.0923819	0.926395	1	DOWN	No	No
ENSMUSG00000021696	Elovl7	ENSMUST00000022207	GO:0009922(fatty acid elongase activity);GO:0016740(transferase activity);GO:0102336(3-oxo-arachidoyl-CoA synthase activity);GO:0102337(3-oxo-cerotoyl-CoA synthase activity);GO:0102338(3-oxo-lignoceronyl-CoA synthase activity);GO:0006629(lipid metabolic process);GO:0006631(fatty acid metabolic process);GO:0006633(fatty acid biosynthetic process);GO:0019367(fatty acid elongation, saturated fatty a…	00062(Fatty acid elongation)	K00634;K10205	EC:2.3.1.19;EC:2.3.1.199	ELOVL family member 7, elongation of long chain fatty acids (yeast) [Source:MGI Symbol;Acc:MGI:1921809]	0.25	0.33	0.0894982	0.757724	0.105579	0.915916	1	UP	No	No
ENSMUSG00000021708	Rasgrf2	ENSMUST00000151408;ENSMUST00000099326;ENSMUST00000142378;ENSMUST00000149630	GO:0005622(intracellular);GO:0046578(regulation of Ras protein signal transduction);GO:0043547(positive regulation of GTPase activity);GO:0035023(regulation of Rho protein signal transduction);GO:0007264(small GTPase mediated signal transduction);GO:0005085(guanyl-nucleotide exchange factor activity);GO:0005089(Rho guanyl-nucleotide exchange factor activity);GO:0005783(endoplasmic reticulum);GO:0…	04010(MAPK signaling pathway);04014(Ras signaling pathway);04014(Ras signaling pathway)			RAS protein-specific guanine nucleotide-releasing factor 2 [Source:MGI Symbol;Acc:MGI:109137]	0.03	0	-0.0426443	0.757724	-0.0395922	0.968418	1	DOWN	No	No
ENSMUSG00000021719	Rgs7bp	ENSMUST00000063551	GO:0005515(protein binding);GO:0007186(G-protein coupled receptor signaling pathway);GO:0009968(negative regulation of signal transduction);GO:0005634(nucleus);GO:0005737(cytoplasm);GO:0005886(plasma membrane);GO:0016020(membrane)				regulator of G-protein signalling 7 binding protein [Source:MGI Symbol;Acc:MGI:106334]	0.05	0	-0.0703893	0.757724	-0.065987	0.947388	1	DOWN	No	No
ENSMUSG00000021732	Fgf10	ENSMUST00000022246	GO:0031012(extracellular matrix);GO:0005104(fibroblast growth factor receptor binding);GO:0005111(type 2 fibroblast growth factor receptor binding);GO:0005515(protein binding);GO:0008083(growth factor activity);GO:0008201(heparin binding);GO:0042056(chemoattractant activity);GO:0000132(establishment of mitotic spindle orientation);GO:0000187(activation of MAPK activity);GO:0001525(angiogenesis);G…	04010(MAPK signaling pathway);04014(Ras signaling pathway);04015(Rap1 signaling pathway);04151(PI3K-Akt signaling pathway);04810(Regulation of actin cytoskeleton);05200(Pathways in cancer);05218(Melanoma)			fibroblast growth factor 10 [Source:MGI Symbol;Acc:MGI:1099809]	0.02	0.04	0.0280144	0.757724	0.0263948	0.978942	1	UP	No	No
ENSMUSG00000021741	Gm5457	ENSMUST00000022260					predicted pseudogene 5457 [Source:MGI Symbol;Acc:MGI:3646665]	0	0.14	0.189034	0.757724	0.184764	0.853414	1	UP	No	No
ENSMUSG00000021745	Ptprg	ENSMUST00000022264;ENSMUST00000148113;ENSMUST00000155727	GO:0070062(extracellular exosome);GO:0016021(integral component of membrane);GO:0016020(membrane);GO:0005615(extracellular space);GO:0035335(peptidyl-tyrosine dephosphorylation);GO:0016311(dephosphorylation);GO:0010977(negative regulation of neuron projection development);GO:0010633(negative regulation of epithelial cell migration);GO:0007420(brain development);GO:0006470(protein dephosphorylatio…				protein tyrosine phosphatase, receptor type, G [Source:MGI Symbol;Acc:MGI:97814]	0.26	0.21	-0.0584167	0.757724	-0.065987	0.947388	1	DOWN	No	No
ENSMUSG00000021747	4930452B06Rik	ENSMUST00000102996	GO:0003674(molecular_function);GO:0008150(biological_process);GO:0005575(cellular_component)				RIKEN cDNA 4930452B06 gene [Source:MGI Symbol;Acc:MGI:1926154]	0.06	0.01	-0.069709	0.757724	-0.065987	0.947388	1	DOWN	No	No
ENSMUSG00000021750	Fam107a	ENSMUST00000121887;ENSMUST00000036070	GO:0003674(molecular_function);GO:0001558(regulation of cell growth);GO:0005634(nucleus);GO:0016607(nuclear speck);GO:0043005(neuron projection);GO:0043005(neuron projection)				family with sequence similarity 107, member A [Source:MGI Symbol;Acc:MGI:3041256]	0.1	0.01	-0.123148	0.757724	-0.118777	0.905452	1	DOWN	No	No
ENSMUSG00000021758	Ddx4	ENSMUST00000099166	GO:0000166(nucleotide binding);GO:0003676(nucleic acid binding);GO:0004386(helicase activity);GO:0005524(ATP binding);GO:0016787(hydrolase activity);GO:0030317(flagellated sperm motility);GO:0005737(cytoplasm);GO:0004004(ATP-dependent RNA helicase activity);GO:0005515(protein binding);GO:0007140(male meiosis);GO:0007141(male meiosis I);GO:0007275(multicellular organism development);GO:0007283(spe…				DEAD (Asp-Glu-Ala-Asp) box polypeptide 4 [Source:MGI Symbol;Acc:MGI:102670]	0.02	0.08	0.0824622	0.757724	0.0791845	0.936886	1	UP	No	No
ENSMUSG00000021763	BC067074	ENSMUST00000136755	GO:0016021(integral component of membrane);GO:0016020(membrane);GO:0003674(molecular_function)				cDNA sequence BC067074 [Source:MGI Symbol;Acc:MGI:3040697]	0	0.01	0.0143553	0.757724	0.0131974	0.98947	1	UP	No	No
ENSMUSG00000021797	9230112D13Rik	ENSMUST00000022325	GO:0003674(molecular_function);GO:0008150(biological_process);GO:0005575(cellular_component)				RIKEN cDNA 9230112D13 gene [Source:MGI Symbol;Acc:MGI:1925493]	0	0.07	0.0976108	0.757724	0.0923819	0.926395	1	UP	No	No
ENSMUSG00000021815	Mss51	ENSMUST00000022353	GO:0003674(molecular_function);GO:0046872(metal ion binding);GO:0008150(biological_process);GO:0035176(social behavior);GO:0005575(cellular_component)				MSS51 mitochondrial translational activator [Source:MGI Symbol;Acc:MGI:1922093]	1.86	1.17	-0.39832	0.757724	-0.910621	0.362495	0.774473	DOWN	No	No
ENSMUSG00000021835	Bmp4	ENSMUST00000074077;ENSMUST00000135408	GO:0005125(cytokine activity);GO:0005160(transforming growth factor beta receptor binding);GO:0005515(protein binding);GO:0008083(growth factor activity);GO:0008201(heparin binding);GO:0039706(co-receptor binding);GO:0042056(chemoattractant activity);GO:0070700(BMP receptor binding);GO:0000122(negative regulation of transcription from RNA polymerase II promoter);GO:0000186(activation of MAPKK act…	04060(Cytokine-cytokine receptor interaction);04340(Hedgehog signaling pathway);04350(TGF-beta signaling pathway);04390(Hippo signaling pathway);04550(Signaling pathways regulating pluripotency of stem cells);04919(Thyroid hormone signaling pathway);05200(Pathways in cancer);05217(Basal cell carcinoma);05217(Basal cell carcinoma)			bone morphogenetic protein 4 [Source:MGI Symbol;Acc:MGI:88180]	0.05	0.11	0.0801703	0.757724	0.0791845	0.936886	1	UP	No	No
ENSMUSG00000021872	Rnase10	ENSMUST00000164632;ENSMUST00000022424	GO:0003676(nucleic acid binding);GO:0016021(integral component of membrane);GO:0016020(membrane);GO:0016020(membrane)				ribonuclease, RNase A family, 10 (non-active) [Source:MGI Symbol;Acc:MGI:1922269]	0	0.03	0.0426443	0.757724	0.0395922	0.968418	1	UP	No	No
ENSMUSG00000021874	4933413J09Rik	ENSMUST00000059648					RIKEN cDNA 4933413J09 gene [Source:MGI Symbol;Acc:MGI:1918356]	0.07	0.01	-0.0832555	0.757724	-0.0791845	0.936886	1	DOWN	No	No
ENSMUSG00000021879	Dnah12	ENSMUST00000022433;ENSMUST00000165269	GO:0007018(microtubule-based movement);GO:0016887(ATPase activity);GO:0005524(ATP binding);GO:0003777(microtubule motor activity);GO:0030286(dynein complex);GO:0030286(dynein complex)	05016(Huntington's disease);05016(Huntington's disease)			dynein, axonemal, heavy chain 12 [Source:MGI Symbol;Acc:MGI:107720]	0.01	0	-0.0143553	0.757724	-0.0131974	0.98947	1	DOWN	No	No
ENSMUSG00000021886	Gpr65	ENSMUST00000075072	GO:0016021(integral component of membrane);GO:0016020(membrane);GO:0005886(plasma membrane);GO:0090630(activation of GTPase activity);GO:0051496(positive regulation of stress fiber assembly);GO:0031532(actin cytoskeleton reorganization);GO:0030819(positive regulation of cAMP biosynthetic process);GO:0010447(response to acidic pH);GO:0007186(G-protein coupled receptor signaling pathway);GO:0007165…				G-protein coupled receptor 65 [Source:MGI Symbol;Acc:MGI:108031]	0.03	3.87	2.24128	0.757724	5.06781	4.02429e-07	1.95158e-06	UP	Yes	Yes
ENSMUSG00000021898	Asb14	ENSMUST00000090337;ENSMUST00000165929;ENSMUST00000167365;ENSMUST00000167929	GO:0005622(intracellular);GO:0035556(intracellular signal transduction);GO:0016567(protein ubiquitination);GO:0016567(protein ubiquitination)				ankyrin repeat and SOCS box-containing 14 [Source:MGI Symbol;Acc:MGI:2655107]	0.09	0.09	0	0.757724	0	1	1		No	No
ENSMUSG00000021919	Chat	ENSMUST00000070125	GO:0016740(transferase activity);GO:0016746(transferase activity, transferring acyl groups)	00564(Glycerophospholipid metabolism);04725(Cholinergic synapse)			choline acetyltransferase [Source:MGI Symbol;Acc:MGI:88392]	0	0	0	0.757724	0				No	No
ENSMUSG00000021927	Gm5803	ENSMUST00000022493					predicted gene 5803 [Source:MGI Symbol;Acc:MGI:3645633]	0.06	0.32	0.316474	0.757724	0.343133	0.731499	1	UP	No	No
ENSMUSG00000021933	Gucy1b2	ENSMUST00000022501;ENSMUST00000165651	GO:0000166(nucleotide binding);GO:0004383(guanylate cyclase activity);GO:0016829(lyase activity);GO:0016849(phosphorus-oxygen lyase activity);GO:0020037(heme binding);GO:0006182(cGMP biosynthetic process);GO:0007165(signal transduction);GO:0009190(cyclic nucleotide biosynthetic process);GO:0035556(intracellular signal transduction);GO:0005886(plasma membrane);GO:0008074(guanylate cyclase complex,…	00230(Purine metabolism);04022(cGMP - PKG signaling pathway);04270(Vascular smooth muscle contraction);04540(Gap junction);04611(Platelet activation);04713(Circadian entrainment);04730(Long-term depression);04921(Oxytocin signaling pathway);04970(Salivary secretion);04970(Salivary secretion)			guanylate cyclase 1, soluble, beta 2 [Source:MGI Symbol;Acc:MGI:2660873]	0.05	0	-0.0703893	0.757724	-0.065987	0.947388	1	DOWN	No	No
ENSMUSG00000021944	Gata4	ENSMUST00000118022;ENSMUST00000067417;ENSMUST00000132122	GO:0003700(transcription factor activity, sequence-specific DNA binding);GO:0000977(RNA polymerase II regulatory region sequence-specific DNA binding);GO:0000978(RNA polymerase II core promoter proximal region sequence-specific DNA binding);GO:0000981(RNA polymerase II transcription factor activity, sequence-specific DNA binding);GO:0001076(transcription factor activity, RNA polymerase II transcr…	04022(cGMP - PKG signaling pathway);04919(Thyroid hormone signaling pathway);04919(Thyroid hormone signaling pathway)			GATA binding protein 4 [Source:MGI Symbol;Acc:MGI:95664]	0.78	0.51	-0.237329	0.757724	-0.35633	0.721593	1	DOWN	No	No
ENSMUSG00000021974	Fgf9	ENSMUST00000165526;ENSMUST00000022545	GO:0005576(extracellular region);GO:0008543(fibroblast growth factor receptor signaling pathway);GO:0008083(growth factor activity);GO:0005104(fibroblast growth factor receptor binding);GO:0008201(heparin binding);GO:0000122(negative regulation of transcription from RNA polymerase II promoter);GO:0001525(angiogenesis);GO:0001649(osteoblast differentiation);GO:0001654(eye development);GO:0002053(p…	04010(MAPK signaling pathway);04014(Ras signaling pathway);04015(Rap1 signaling pathway);04151(PI3K-Akt signaling pathway);04810(Regulation of actin cytoskeleton);05200(Pathways in cancer);05218(Melanoma);05218(Melanoma)			fibroblast growth factor 9 [Source:MGI Symbol;Acc:MGI:104723]	0.03	0.02	-0.0140752	0.757724	-0.0131974	0.98947	1	DOWN	No	No
ENSMUSG00000021983	Atp8a2	ENSMUST00000080368	GO:0000166(nucleotide binding);GO:0000287(magnesium ion binding);GO:0004012(phospholipid-translocating ATPase activity);GO:0005524(ATP binding);GO:0016787(hydrolase activity);GO:0046872(metal ion binding);GO:0003011(involuntary skeletal muscle contraction);GO:0006810(transport);GO:0006869(lipid transport);GO:0007409(axonogenesis);GO:0007568(aging);GO:0010842(retina layer formation);GO:0010976(pos…				ATPase, aminophospholipid transporter-like, class I, type 8A, member 2 [Source:MGI Symbol;Acc:MGI:1354710]	0.01	0	-0.0143553	0.757724	-0.0131974	0.98947	1	DOWN	No	No
ENSMUSG00000021986	Amer2	ENSMUST00000022561	GO:0005886(plasma membrane);GO:0090090(negative regulation of canonical Wnt signaling pathway);GO:0005546(phosphatidylinositol-4,5-bisphosphate binding)				APC membrane recruitment 2 [Source:MGI Symbol;Acc:MGI:1919375]	0.02	0	-0.0285692	0.757724	-0.0263948	0.978942	1	DOWN	No	No
ENSMUSG00000021997	Lrrc63	ENSMUST00000022574					leucine rich repeat containing 63 [Source:MGI Symbol;Acc:MGI:1918109]	0	0.04	0.0565835	0.757724	0.0527896	0.9579	1	UP	No	No
ENSMUSG00000022015	Tnfsf11	ENSMUST00000022592	GO:0005125(cytokine activity);GO:0005164(tumor necrosis factor receptor binding);GO:0005515(protein binding);GO:0032813(tumor necrosis factor receptor superfamily binding);GO:0001503(ossification);GO:0002158(osteoclast proliferation);GO:0002548(monocyte chemotaxis);GO:0006955(immune response);GO:0007257(activation of JUN kinase activity);GO:0007275(multicellular organism development);GO:0009887(a…	04060(Cytokine-cytokine receptor interaction);04064(NF-kappa B signaling pathway);04380(Osteoclast differentiation);04917(Prolactin signaling pathway);05323(Rheumatoid arthritis)			tumor necrosis factor (ligand) superfamily, member 11 [Source:MGI Symbol;Acc:MGI:1100089]	0.1	0.08	-0.0264722	0.757724	-0.0263948	0.978942	1	DOWN	No	No
ENSMUSG00000022026	Olfm4	ENSMUST00000088735	GO:0070062(extracellular exosome);GO:0048471(perinuclear region of cytoplasm);GO:0042581(specific granule);GO:0005886(plasma membrane);GO:0005615(extracellular space);GO:1900026(positive regulation of substrate adhesion-dependent cell spreading);GO:0051260(protein homooligomerization);GO:0045296(cadherin binding);GO:0042803(protein homodimerization activity)				olfactomedin 4 [Source:MGI Symbol;Acc:MGI:2685142]	0.03	0.02	-0.0140752	0.757724	-0.0131974	0.98947	1	DOWN	No	No
ENSMUSG00000022041	Chrna2	ENSMUST00000022620	GO:0022848(acetylcholine-gated cation-selective channel activity);GO:0042166(acetylcholine binding);GO:0005216(ion channel activity);GO:0005230(extracellular ligand-gated ion channel activity);GO:0015464(acetylcholine receptor activity);GO:0006810(transport);GO:0006811(ion transport);GO:0007165(signal transduction);GO:0007271(synaptic transmission, cholinergic);GO:0007274(neuromuscular synaptic t…	04080(Neuroactive ligand-receptor interaction)			cholinergic receptor, nicotinic, alpha polypeptide 2 (neuronal) [Source:MGI Symbol;Acc:MGI:87886]	0	0.01	0.0143553	0.757724	0.0131974	0.98947	1	UP	No	No
ENSMUSG00000022044	Stmn4	ENSMUST00000152093;ENSMUST00000123435;ENSMUST00000121955	GO:0015631(tubulin binding);GO:0007019(microtubule depolymerization);GO:0031110(regulation of microtubule polymerization or depolymerization);GO:0031175(neuron projection development);GO:0051493(regulation of cytoskeleton organization);GO:0005737(cytoplasm);GO:0005794(Golgi apparatus);GO:0030424(axon);GO:0030426(growth cone);GO:0042995(cell projection);GO:0043005(neuron projection);GO:0043005(neu…				stathmin-like 4 [Source:MGI Symbol;Acc:MGI:1931224]	0	0.12	0.163499	0.757724	0.158369	0.874166	1	UP	No	No
ENSMUSG00000022054	Nefm	ENSMUST00000022638	GO:0097418(neurofibrillary tangle);GO:0005883(neurofilament);GO:0005882(intermediate filament);GO:0061564(axon development);GO:0005198(structural molecule activity)	05014(Amyotrophic lateral sclerosis (ALS))			neurofilament, medium polypeptide [Source:MGI Symbol;Acc:MGI:97314]	0	0.01	0.0143553	0.757724	0.0131974	0.98947	1	UP	No	No
ENSMUSG00000022085	Pebp4	ENSMUST00000022678	GO:0070062(extracellular exosome)				phosphatidylethanolamine binding protein 4 [Source:MGI Symbol;Acc:MGI:1920773]	0.08	0.04	-0.0544478	0.757724	-0.0527896	0.9579	1	DOWN	No	No
ENSMUSG00000022099	Dmtn	ENSMUST00000110984;ENSMUST00000022695	GO:0003779(actin binding);GO:0005102(receptor binding);GO:0030507(spectrin binding);GO:0043621(protein self-association);GO:0006461(protein complex assembly);GO:0007010(cytoskeleton organization);GO:0008360(regulation of cell shape);GO:0010591(regulation of lamellipodium assembly);GO:0010763(positive regulation of fibroblast migration);GO:0010801(negative regulation of peptidyl-threonine phosphor…				dematin actin binding protein [Source:MGI Symbol;Acc:MGI:99670]	0.17	0.07	-0.128898	0.757724	-0.131974	0.895005	1	DOWN	No	No
ENSMUSG00000022101	Fgf17	ENSMUST00000022697	GO:0005104(fibroblast growth factor receptor binding);GO:0005105(type 1 fibroblast growth factor receptor binding);GO:0005111(type 2 fibroblast growth factor receptor binding);GO:0008083(growth factor activity);GO:0007275(multicellular organism development);GO:0008284(positive regulation of cell proliferation);GO:0008543(fibroblast growth factor receptor signaling pathway);GO:0005576(extracellula…	04010(MAPK signaling pathway);04014(Ras signaling pathway);04015(Rap1 signaling pathway);04151(PI3K-Akt signaling pathway);04810(Regulation of actin cytoskeleton);05200(Pathways in cancer);05218(Melanoma)			fibroblast growth factor 17 [Source:MGI Symbol;Acc:MGI:1202401]	0.36	0.09	-0.319279	0.757724	-0.35633	0.721593	1	DOWN	No	No
ENSMUSG00000022157	Mcpt8	ENSMUST00000015594	GO:0004252(serine-type endopeptidase activity);GO:0008233(peptidase activity);GO:0008236(serine-type peptidase activity);GO:0016787(hydrolase activity);GO:0006508(proteolysis);GO:0006955(immune response);GO:0016485(protein processing);GO:0005576(extracellular region);GO:0005615(extracellular space);GO:0005737(cytoplasm);GO:0043231(intracellular membrane-bounded organelle)				mast cell protease 8 [Source:MGI Symbol;Acc:MGI:1261780]	0.14	0.21	0.0859732	0.757724	0.0923819	0.926395	1	UP	No	No
ENSMUSG00000022176	Rem2	ENSMUST00000164766;ENSMUST00000170337	GO:0016020(membrane);GO:0005622(intracellular);GO:0007264(small GTPase mediated signal transduction);GO:0007165(signal transduction);GO:0005525(GTP binding);GO:0003924(GTPase activity);GO:0000166(nucleotide binding);GO:0000166(nucleotide binding)				rad and gem related GTP binding protein 2 [Source:MGI Symbol;Acc:MGI:2155260]	0.04	0.03	-0.0139392	0.757724	-0.0131974	0.98947	1	DOWN	No	No
ENSMUSG00000022187	Gm5546	ENSMUST00000056145					predicted gene 5546 [Source:MGI Symbol;Acc:MGI:3648205]	0.02	0	-0.0285692	0.757724	-0.0263948	0.978942	1	DOWN	No	No
ENSMUSG00000022199	Slc22a17	ENSMUST00000050772	GO:0004888(transmembrane signaling receptor activity);GO:0005215(transporter activity);GO:0005515(protein binding);GO:0008514(organic anion transmembrane transporter activity);GO:0022857(transmembrane transporter activity);GO:0006810(transport);GO:0006811(ion transport);GO:0006879(cellular iron ion homeostasis);GO:0007165(signal transduction);GO:0015711(organic anion transport);GO:0015891(siderop…				solute carrier family 22 (organic cation transporter), member 17 [Source:MGI Symbol;Acc:MGI:1926225]	0.05	0.04	-0.0138058	0.757724	-0.0131974	0.98947	1	DOWN	No	No
ENSMUSG00000022206	Npr3	ENSMUST00000066529	GO:0008528(G-protein coupled peptide receptor activity);GO:0016941(natriuretic peptide receptor activity);GO:0017046(peptide hormone binding);GO:0042562(hormone binding);GO:0042803(protein homodimerization activity);GO:0001501(skeletal system development);GO:0002158(osteoclast proliferation);GO:0007193(adenylate cyclase-inhibiting G-protein coupled receptor signaling pathway);GO:0007194(negative …				natriuretic peptide receptor 3 [Source:MGI Symbol;Acc:MGI:97373]	0.07	0.02	-0.0690416	0.757724	-0.065987	0.947388	1	DOWN	No	No
ENSMUSG00000022208	Jph4	ENSMUST00000022819	GO:0003674(molecular_function);GO:0001817(regulation of cytokine production);GO:0007612(learning);GO:0048167(regulation of synaptic plasticity);GO:0050885(neuromuscular process controlling balance);GO:2001256(regulation of store-operated calcium entry);GO:0005783(endoplasmic reticulum);GO:0005789(endoplasmic reticulum membrane);GO:0005790(smooth endoplasmic reticulum);GO:0005886(plasma membrane);…				junctophilin 4 [Source:MGI Symbol;Acc:MGI:2443113]	0	0.02	0.0285692	0.757724	0.0263948	0.978942	1	UP	No	No
ENSMUSG00000022231	Sema5a	ENSMUST00000067458	GO:0016020(membrane);GO:0016021(integral component of membrane);GO:0070062(extracellular exosome)	04360(Axon guidance)			sema domain, seven thrombospondin repeats (type 1 and type 1-like), transmembrane domain (TM) and short cytoplasmic domain, (semaphorin) 5A [Source:MGI Symbol;Acc:MGI:107556]	0.37	0.24	-0.143836	0.757724	-0.171566	0.863778	1	DOWN	No	No
ENSMUSG00000022240	Ctnnd2	ENSMUST00000081728	GO:0043204(perikaryon);GO:0060997(dendritic spine morphogenesis);GO:0060828(regulation of canonical Wnt signaling pathway);GO:0050808(synapse organization);GO:0016337(single organismal cell-cell adhesion);GO:0008013(beta-catenin binding)				catenin (cadherin associated protein), delta 2 [Source:MGI Symbol;Acc:MGI:1195966]	0.11	0.13	0.0257631	0.757724	0.0263948	0.978942	1	UP	No	No
ENSMUSG00000022245	Skor1	ENSMUST00000055281	GO:0003714(transcription corepressor activity);GO:0005515(protein binding);GO:0046332(SMAD binding);GO:0006351(transcription, DNA-templated);GO:0006355(regulation of transcription, DNA-templated);GO:0030512(negative regulation of transforming growth factor beta receptor signaling pathway);GO:0030514(negative regulation of BMP signaling pathway);GO:0045596(negative regulation of cell differentiati…				SKI family transcriptional corepressor 1 [Source:MGI Symbol;Acc:MGI:2443473]	0.05	0.06	0.0136749	0.757724	0.0131974	0.98947	1	UP	No	No
ENSMUSG00000022269	March11	ENSMUST00000140840;ENSMUST00000155819	GO:0003674(molecular_function);GO:0008270(zinc ion binding);GO:0016740(transferase activity);GO:0046872(metal ion binding);GO:0008150(biological_process);GO:0016567(protein ubiquitination);GO:0005575(cellular_component);GO:0016020(membrane);GO:0016021(integral component of membrane);GO:0030659(cytoplasmic vesicle membrane);GO:0031410(cytoplasmic vesicle);GO:0031410(cytoplasmic vesicle)		K13452	EC:6.3.2.-	membrane-associated ring finger (C3HC4) 11 [Source:MGI Symbol;Acc:MGI:3608327]	0.03	0.02	-0.0140752	0.757724	-0.0131974	0.98947	1	DOWN	No	No
ENSMUSG00000022303	Dcstamp	ENSMUST00000022913	GO:0002376(immune system process);GO:0030154(cell differentiation);GO:0030308(negative regulation of cell growth);GO:0030316(osteoclast differentiation);GO:0034241(positive regulation of macrophage fusion);GO:0036006(cellular response to macrophage colony-stimulating factor stimulus);GO:0043011(myeloid dendritic cell differentiation);GO:0045657(positive regulation of monocyte differentiation);GO:…				dendrocyte expressed seven transmembrane protein [Source:MGI Symbol;Acc:MGI:1923016]	0.2	0.02	-0.234465	0.757724	-0.237553	0.812228	1	DOWN	No	No
ENSMUSG00000022304	Dpys	ENSMUST00000022915;ENSMUST00000110306	GO:0002058(uracil binding);GO:0002059(thymine binding);GO:0004157(dihydropyrimidinase activity);GO:0008270(zinc ion binding);GO:0016597(amino acid binding);GO:0016787(hydrolase activity);GO:0016810(hydrolase activity, acting on carbon-nitrogen (but not peptide) bonds);GO:0046872(metal ion binding);GO:0051219(phosphoprotein binding);GO:0006208(pyrimidine nucleobase catabolic process);GO:0006210(th…	00240(Pyrimidine metabolism);00410(beta-Alanine metabolism);00770(Pantothenate and CoA biosynthesis);00983(Drug metabolism - other enzymes);00983(Drug metabolism - other enzymes)	K01464	EC:3.5.2.2	dihydropyrimidinase [Source:MGI Symbol;Acc:MGI:1928679]	0	0	0	0.757724	0				No	No
ENSMUSG00000022306	Zfpm2	ENSMUST00000053467	GO:0001078(transcriptional repressor activity, RNA polymerase II core promoter proximal region sequence-specific binding);GO:0001085(RNA polymerase II transcription factor binding);GO:0003676(nucleic acid binding);GO:0003677(DNA binding);GO:0003714(transcription corepressor activity);GO:0005515(protein binding);GO:0008134(transcription factor binding);GO:0046872(metal ion binding);GO:0000122(nega…	05206(MicroRNAs in cancer)			zinc finger protein, multitype 2 [Source:MGI Symbol;Acc:MGI:1334444]	0.06	0	-0.0840643	0.757724	-0.0791845	0.936886	1	DOWN	No	No
ENSMUSG00000022340	Sybu	ENSMUST00000090057	GO:0005874(microtubule);GO:0031982(vesicle);GO:0008017(microtubule binding);GO:0017075(syntaxin-1 binding);GO:0019894(kinesin binding);GO:0061178(regulation of insulin secretion involved in cellular response to glucose stimulus);GO:0000139(Golgi membrane);GO:0005794(Golgi apparatus);GO:0016020(membrane);GO:0016021(integral component of membrane);GO:0043231(intracellular membrane-bounded organelle…				syntabulin (syntaxin-interacting) [Source:MGI Symbol;Acc:MGI:2442392]	0.02	0.02	0	0.757724	0	1	1		No	No
ENSMUSG00000022408	Fam83f	ENSMUST00000023044					family with sequence similarity 83, member F [Source:MGI Symbol;Acc:MGI:2146227]	0.16	0.46	0.331844	0.757724	0.395922	0.692162	1	UP	No	No
ENSMUSG00000022445	Cyp2d26	ENSMUST00000006094	GO:0043231(intracellular membrane-bounded organelle);GO:0016021(integral component of membrane);GO:0016020(membrane);GO:0055114(oxidation-reduction process);GO:0042493(response to drug);GO:0007565(female pregnancy);GO:0046872(metal ion binding);GO:0020037(heme binding);GO:0016712(oxidoreductase activity, acting on paired donors, with incorporation or reduction of molecular oxygen, reduced flavin …	00140(Steroid hormone biosynthesis);04726(Serotonergic synapse)	K17712	EC:1.14.14.1	cytochrome P450, family 2, subfamily d, polypeptide 26 [Source:MGI Symbol;Acc:MGI:1923529]	0.03	0	-0.0426443	0.757724	-0.0395922	0.968418	1	DOWN	No	No
ENSMUSG00000022449	Adamts20	ENSMUST00000035342;ENSMUST00000155907	GO:0004175(endopeptidase activity);GO:0004222(metalloendopeptidase activity);GO:0008233(peptidase activity);GO:0008237(metallopeptidase activity);GO:0008270(zinc ion binding);GO:0016787(hydrolase activity);GO:0046872(metal ion binding);GO:0006508(proteolysis);GO:0009967(positive regulation of signal transduction);GO:0030198(extracellular matrix organization);GO:0043066(negative regulation of apop…				a disintegrin-like and metallopeptidase (reprolysin type) with thrombospondin type 1 motif, 20 [Source:MGI Symbol;Acc:MGI:2660628]	0	0.01	0.0143553	0.757724	0.0131974	0.98947	1	UP	No	No
ENSMUSG00000022456	Sept3	ENSMUST00000023095	GO:0000166(nucleotide binding);GO:0005525(GTP binding);GO:0042802(identical protein binding);GO:0007049(cell cycle);GO:0051301(cell division);GO:0005737(cytoplasm);GO:0005856(cytoskeleton);GO:0030054(cell junction);GO:0045202(synapse)	05100(Bacterial invasion of epithelial cells)			septin 3 [Source:MGI Symbol;Acc:MGI:1345148]	0.23	0.13	-0.122336	0.757724	-0.131974	0.895005	1	DOWN	No	No
ENSMUSG00000022468	Endou	ENSMUST00000023105;ENSMUST00000100249	GO:0003723(RNA binding);GO:0004518(nuclease activity);GO:0004519(endonuclease activity);GO:0004521(endoribonuclease activity);GO:0005044(scavenger receptor activity);GO:0008236(serine-type peptidase activity);GO:0016787(hydrolase activity);GO:0016788(hydrolase activity, acting on ester bonds);GO:0030247(polysaccharide binding);GO:0046872(metal ion binding);GO:0006508(proteolysis);GO:0006898(recep…				endonuclease, polyU-specific [Source:MGI Symbol;Acc:MGI:97746]	0.22	0.34	0.135352	0.757724	0.158369	0.874166	1	UP	No	No
ENSMUSG00000022483	Col2a1	ENSMUST00000023123	GO:0005201(extracellular matrix structural constituent);GO:0042802(identical protein binding);GO:0046872(metal ion binding);GO:0048407(platelet-derived growth factor binding);GO:0001501(skeletal system development);GO:0001502(cartilage condensation);GO:0001503(ossification);GO:0001894(tissue homeostasis);GO:0001958(endochondral ossification);GO:0002062(chondrocyte differentiation);GO:0003007(hear…	04151(PI3K-Akt signaling pathway);04510(Focal adhesion);04512(ECM-receptor interaction);04611(Platelet activation);04974(Protein digestion and absorption);05146(Amoebiasis)			collagen, type II, alpha 1 [Source:MGI Symbol;Acc:MGI:88452]	0.24	0.08	-0.199309	0.757724	-0.211159	0.832764	1	DOWN	No	No
ENSMUSG00000022487	Gtsf1	ENSMUST00000023129	GO:0046872(metal ion binding);GO:0007283(spermatogenesis);GO:0030154(cell differentiation);GO:0005737(cytoplasm)				gametocyte specific factor 1 [Source:MGI Symbol;Acc:MGI:1921424]	0	0.07	0.0976108	0.757724	0.0923819	0.926395	1	UP	No	No
ENSMUSG00000022494	Shisa9	ENSMUST00000023138	GO:0030165(PDZ domain binding);GO:0048172(regulation of short-term neuronal synaptic plasticity);GO:0098962(regulation of postsynaptic neurotransmitter receptor activity);GO:2000311(regulation of AMPA receptor activity);GO:0005886(plasma membrane);GO:0008328(ionotropic glutamate receptor complex);GO:0014069(postsynaptic density);GO:0016020(membrane);GO:0016021(integral component of membrane);GO:0…				shisa family member 9 [Source:MGI Symbol;Acc:MGI:1919805]	0	0.01	0.0143553	0.757724	0.0131974	0.98947	1	UP	No	No
ENSMUSG00000022496	Tnfrsf17	ENSMUST00000023140	GO:0004872(receptor activity);GO:0002250(adaptive immune response);GO:0002260(lymphocyte homeostasis);GO:0002376(immune system process);GO:0007165(signal transduction);GO:0016020(membrane);GO:0016021(integral component of membrane)	04060(Cytokine-cytokine receptor interaction);04672(Intestinal immune network for IgA production)			tumor necrosis factor receptor superfamily, member 17 [Source:MGI Symbol;Acc:MGI:1343050]	0	0	0	0.757724	0				No	No
ENSMUSG00000022501	Prm1	ENSMUST00000023144	GO:0005694(chromosome);GO:0005634(nucleus);GO:0000786(nucleosome);GO:0030261(chromosome condensation);GO:0030154(cell differentiation);GO:0007283(spermatogenesis);GO:0007275(multicellular organism development);GO:0003677(DNA binding);GO:0006997(nucleus organization);GO:0007286(spermatid development)				protamine 1 [Source:MGI Symbol;Acc:MGI:97765]	0.12	0	-0.163499	0.757724	-0.158369	0.874166	1	DOWN	No	No
ENSMUSG00000022518	4930562C15Rik	ENSMUST00000100211;ENSMUST00000171105	GO:0005575(cellular_component);GO:0008150(biological_process);GO:0003674(molecular_function);GO:0003674(molecular_function)				RIKEN cDNA 4930562C15 gene [Source:MGI Symbol;Acc:MGI:1926059]	0.01	0.01	0	0.757724	0	1	1		No	No
ENSMUSG00000022526	Zfp251	ENSMUST00000080406	GO:0003676(nucleic acid binding);GO:0003700(transcription factor activity, sequence-specific DNA binding);GO:0046872(metal ion binding);GO:0006355(regulation of transcription, DNA-templated);GO:0005575(cellular_component);GO:0005622(intracellular)				zinc finger protein 251 [Source:MGI Symbol;Acc:MGI:1918841]	1.48	5.77	1.44882	0.757724	5.66169	1.49891e-08	7.87405e-08	UP	Yes	Yes
ENSMUSG00000022537	Tmem44	ENSMUST00000144491;ENSMUST00000089775;ENSMUST00000140402;ENSMUST00000149110;ENSMUST00000125260;ENSMUST00000125559	GO:0016021(integral component of membrane);GO:0016020(membrane);GO:0005575(cellular_component);GO:0008150(biological_process);GO:0003674(molecular_function);GO:0003674(molecular_function)				transmembrane protein 44 [Source:MGI Symbol;Acc:MGI:1924489]	0.31	0.18	-0.15078	0.757724	-0.171566	0.863778	1	DOWN	No	No
ENSMUSG00000022542	Sept12	ENSMUST00000170323	GO:0000166(nucleotide binding);GO:0005525(GTP binding);GO:0042802(identical protein binding);GO:0042803(protein homodimerization activity);GO:0097722(sperm motility);GO:0005819(spindle);GO:0015630(microtubule cytoskeleton);GO:0030496(midbody);GO:0031105(septin complex);GO:0048471(perinuclear region of cytoplasm);GO:0097227(sperm annulus)	05100(Bacterial invasion of epithelial cells)			septin 12 [Source:MGI Symbol;Acc:MGI:1918339]	0.14	0.08	-0.0780025	0.757724	-0.0791845	0.936886	1	DOWN	No	No
ENSMUSG00000022543	4930451G09Rik	ENSMUST00000090457	GO:0003674(molecular_function);GO:0008150(biological_process);GO:0005575(cellular_component)				RIKEN cDNA 4930451G09 gene [Source:MGI Symbol;Acc:MGI:1921934]	0.11	0.04	-0.0939761	0.757724	-0.0923819	0.926395	1	DOWN	No	No
ENSMUSG00000022582	Ly6g	ENSMUST00000190262	GO:0005886(plasma membrane);GO:0009897(external side of plasma membrane);GO:0016020(membrane);GO:0031225(anchored component of membrane)				lymphocyte antigen 6 complex, locus G [Source:MGI Symbol;Acc:MGI:109440]	0	0	0	0.757724	0				No	No
ENSMUSG00000022602	Arc	ENSMUST00000023268	GO:0003779(actin binding);GO:0005515(protein binding);GO:0006897(endocytosis);GO:0007010(cytoskeleton organization);GO:0007275(multicellular organism development);GO:0007492(endoderm development);GO:0007612(learning);GO:0009952(anterior/posterior pattern specification);GO:0016477(cell migration);GO:0022604(regulation of cell morphogenesis);GO:0048168(regulation of neuronal synaptic plasticity);GO…	05031(Amphetamine addiction)			activity regulated cytoskeletal-associated protein [Source:MGI Symbol;Acc:MGI:88067]	0.17	0.21	0.0484985	0.757724	0.0527896	0.9579	1	UP	No	No
ENSMUSG00000022619	Mapk8ip2	ENSMUST00000023291	GO:0016301(kinase activity);GO:0019901(protein kinase binding);GO:0032403(protein complex binding);GO:0016310(phosphorylation);GO:0032874(positive regulation of stress-activated MAPK cascade);GO:0046328(regulation of JNK cascade);GO:0005737(cytoplasm);GO:0043234(protein complex);GO:0005515(protein binding);GO:0019894(kinesin binding);GO:0030295(protein kinase activator activity);GO:0000165(MAPK c…	04010(MAPK signaling pathway)			mitogen-activated protein kinase 8 interacting protein 2 [Source:MGI Symbol;Acc:MGI:1926555]	0.06	0.01	-0.069709	0.757724	-0.065987	0.947388	1	DOWN	No	No
ENSMUSG00000022622	Acr	ENSMUST00000023295	GO:0004040(amidase activity);GO:0004252(serine-type endopeptidase activity);GO:0005515(protein binding);GO:0005537(mannose binding);GO:0008144(drug binding);GO:0008233(peptidase activity);GO:0008236(serine-type peptidase activity);GO:0016787(hydrolase activity);GO:0042806(fucose binding);GO:0006508(proteolysis);GO:0007190(activation of adenylate cyclase activity);GO:0007338(single fertilization);…				acrosin prepropeptide [Source:MGI Symbol;Acc:MGI:87884]	0.19	0.1	-0.113458	0.757724	-0.118777	0.905452	1	DOWN	No	No
ENSMUSG00000022657	Cd96	ENSMUST00000023336	GO:0005515(protein binding);GO:0002534(cytokine production involved in inflammatory response);GO:0002728(negative regulation of natural killer cell cytokine production);GO:0007155(cell adhesion);GO:0007160(cell-matrix adhesion);GO:0032496(response to lipopolysaccharide);GO:0032689(negative regulation of interferon-gamma production);GO:0005737(cytoplasm);GO:0005912(adherens junction);GO:0016020(me…				CD96 antigen [Source:MGI Symbol;Acc:MGI:1934368]	0.53	0.49	-0.0382193	0.757724	-0.0527896	0.9579	1	DOWN	No	No
ENSMUSG00000022658	Tagln3	ENSMUST00000096057	GO:0003674(molecular_function);GO:0051015(actin filament binding);GO:0000122(negative regulation of transcription from RNA polymerase II promoter);GO:0005634(nucleus);GO:0043209(myelin sheath)				transgelin 3 [Source:MGI Symbol;Acc:MGI:1926784]	0.27	0.41	0.150867	0.757724	0.184764	0.853414	1	UP	No	No
ENSMUSG00000022659	Gcsam	ENSMUST00000161347;ENSMUST00000023339	GO:0003779(actin binding);GO:0019901(protein kinase binding);GO:0045159(myosin II binding);GO:0050855(regulation of B cell receptor signaling pathway);GO:2000401(regulation of lymphocyte migration);GO:2000402(negative regulation of lymphocyte migration);GO:0005737(cytoplasm);GO:0005886(plasma membrane);GO:0016020(membrane);GO:0016020(membrane)				germinal center associated, signaling and motility [Source:MGI Symbol;Acc:MGI:102969]	0.2	0.1	-0.125531	0.757724	-0.131974	0.895005	1	DOWN	No	No
ENSMUSG00000022686	B3gnt5	ENSMUST00000121344;ENSMUST00000079780;ENSMUST00000164397;ENSMUST00000152845;ENSMUST00000131557;ENSMUST00000155780;ENSMUST00000119468	GO:0008378(galactosyltransferase activity);GO:0008457(beta-galactosyl-N-acetylglucosaminylgalactosylglucosyl-ceramide beta-1,3-acetylglucosaminyltransferase activity);GO:0016740(transferase activity);GO:0016757(transferase activity, transferring glycosyl groups);GO:0047256(lactosylceramide 1,3-N-acetyl-beta-D-glucosaminyltransferase activity);GO:0006486(protein glycosylation);GO:0007275(multicell…	00601(Glycosphingolipid biosynthesis - lacto and neolacto series);00601(Glycosphingolipid biosynthesis - lacto and neolacto series)			UDP-GlcNAc:betaGal beta-1,3-N-acetylglucosaminyltransferase 5 [Source:MGI Symbol;Acc:MGI:2137302]	0.01	0.27	0.330473	0.757724	0.343133	0.731499	1	UP	No	No
ENSMUSG00000022687	Boc	ENSMUST00000114634	GO:0044295(axonal growth cone);GO:0016021(integral component of membrane);GO:0016020(membrane);GO:0005887(integral component of plasma membrane);GO:0045663(positive regulation of myoblast differentiation);GO:0007411(axon guidance);GO:0007224(smoothened signaling pathway)				biregional cell adhesion molecule-related/down-regulated by oncogenes (Cdon) binding protein [Source:MGI Symbol;Acc:MGI:2151153]	0.31	0.24	-0.0792267	0.757724	-0.0923819	0.926395	1	DOWN	No	No
ENSMUSG00000022696	Sidt1	ENSMUST00000136381;ENSMUST00000047446;ENSMUST00000127124	GO:0003725(double-stranded RNA binding);GO:0051033(RNA transmembrane transporter activity);GO:0008150(biological_process);GO:0033227(dsRNA transport);GO:0005575(cellular_component);GO:0016020(membrane);GO:0016021(integral component of membrane);GO:0016021(integral component of membrane)				SID1 transmembrane family, member 1 [Source:MGI Symbol;Acc:MGI:2443155]	0.12	0.18	0.0752881	0.757724	0.0791845	0.936886	1	UP	No	No
ENSMUSG00000022708	Zbtb20	ENSMUST00000126354;ENSMUST00000151244;ENSMUST00000114694;ENSMUST00000079441;ENSMUST00000114691;ENSMUST00000141941;ENSMUST00000114690	GO:0001078(transcriptional repressor activity, RNA polymerase II core promoter proximal region sequence-specific binding);GO:0003676(nucleic acid binding);GO:0003677(DNA binding);GO:0046872(metal ion binding);GO:0000122(negative regulation of transcription from RNA polymerase II promoter);GO:0006351(transcription, DNA-templated);GO:0006355(regulation of transcription, DNA-templated);GO:0010629(ne…				zinc finger and BTB domain containing 20 [Source:MGI Symbol;Acc:MGI:1929213]	0.38	0.45	0.0713846	0.757724	0.0923819	0.926395	1	UP	No	No
ENSMUSG00000022753	Tmem30c	ENSMUST00000119407	GO:0003674(molecular_function);GO:0008150(biological_process);GO:0005575(cellular_component);GO:0016020(membrane);GO:0016021(integral component of membrane)				transmembrane protein 30C [Source:MGI Symbol;Acc:MGI:1918277]	0.01	0.01	0	0.757724	0	1	1		No	No
ENSMUSG00000022756	Slc7a4	ENSMUST00000172164;ENSMUST00000116648;ENSMUST00000164545;ENSMUST00000164623;ENSMUST00000164490	GO:0015171(amino acid transmembrane transporter activity);GO:0003333(amino acid transmembrane transport);GO:0006810(transport);GO:0006865(amino acid transport);GO:0016020(membrane);GO:0016021(integral component of membrane);GO:0016021(integral component of membrane)				solute carrier family 7 (cationic amino acid transporter, y+ system), member 4 [Source:MGI Symbol;Acc:MGI:2146512]	0.42	0.42	0	0.757724	0	1	1		No	No
ENSMUSG00000022758	P2rx6	ENSMUST00000171002;ENSMUST00000023441;ENSMUST00000168383	GO:0098794(postsynapse);GO:0016021(integral component of membrane);GO:0016020(membrane);GO:0005887(integral component of plasma membrane);GO:0098655(cation transmembrane transport);GO:0060079(excitatory postsynaptic potential);GO:0035590(purinergic nucleotide receptor signaling pathway);GO:0033198(response to ATP);GO:0006811(ion transport);GO:0006810(transport);GO:0005524(ATP binding);GO:0005216(…	04020(Calcium signaling pathway);04080(Neuroactive ligand-receptor interaction);04080(Neuroactive ligand-receptor interaction)			purinergic receptor P2X, ligand-gated ion channel, 6 [Source:MGI Symbol;Acc:MGI:1337113]	0.07	0.07	0	0.757724	0	1	1		No	No
ENSMUSG00000022780	Meltf	ENSMUST00000023464	GO:0005506(iron ion binding);GO:0010756(positive regulation of plasminogen activation);GO:0090091(positive regulation of extracellular matrix disassembly);GO:0097286(iron ion import);GO:1900025(negative regulation of substrate adhesion-dependent cell spreading);GO:0005576(extracellular region);GO:0005615(extracellular space);GO:0009986(cell surface);GO:0046658(anchored component of plasma membran…				melanotransferrin [Source:MGI Symbol;Acc:MGI:1353421]	0.04	0.01	-0.0422282	0.757724	-0.0395922	0.968418	1	DOWN	No	No
ENSMUSG00000022790	Igsf11	ENSMUST00000023478;ENSMUST00000210471	GO:0016021(integral component of membrane);GO:0016020(membrane);GO:0007155(cell adhesion);GO:0040008(regulation of growth);GO:0005886(plasma membrane);GO:0070062(extracellular exosome);GO:0070062(extracellular exosome)				immunoglobulin superfamily, member 11 [Source:MGI Symbol;Acc:MGI:2388477]	0	0.02	0.0285692	0.757724	0.0263948	0.978942	1	UP	No	No
ENSMUSG00000022818	Cyp2ab1	ENSMUST00000182508;ENSMUST00000023513;ENSMUST00000182741;ENSMUST00000182669	GO:0004497(monooxygenase activity);GO:0005506(iron ion binding);GO:0016491(oxidoreductase activity);GO:0016705(oxidoreductase activity, acting on paired donors, with incorporation or reduction of molecular oxygen);GO:0020037(heme binding);GO:0046872(metal ion binding);GO:0055114(oxidation-reduction process);GO:0055114(oxidation-reduction process)				cytochrome P450, family 2, subfamily ab, polypeptide 1 [Source:MGI Symbol;Acc:MGI:3644957]	0.1	0.03	-0.0948592	0.757724	-0.0923819	0.926395	1	DOWN	No	No
ENSMUSG00000022847	Thpo	ENSMUST00000076422;ENSMUST00000115437	GO:0005125(cytokine activity);GO:0005179(hormone activity);GO:0001934(positive regulation of protein phosphorylation);GO:0008283(cell proliferation);GO:0030099(myeloid cell differentiation);GO:0038163(thrombopoietin-mediated signaling pathway);GO:0045654(positive regulation of megakaryocyte differentiation);GO:0051897(positive regulation of protein kinase B signaling);GO:0070374(positive regulati…	04060(Cytokine-cytokine receptor interaction);04630(Jak-STAT signaling pathway);04640(Hematopoietic cell lineage);04640(Hematopoietic cell lineage)			thrombopoietin [Source:MGI Symbol;Acc:MGI:101875]	0.03	0.08	0.068387	0.757724	0.065987	0.947388	1	UP	No	No
ENSMUSG00000022861	Dgkg	ENSMUST00000089925;ENSMUST00000150553	GO:0000166(nucleotide binding);GO:0004143(diacylglycerol kinase activity);GO:0005509(calcium ion binding);GO:0005524(ATP binding);GO:0016301(kinase activity);GO:0016740(transferase activity);GO:0046872(metal ion binding);GO:0007205(protein kinase C-activating G-protein coupled receptor signaling pathway);GO:0016310(phosphorylation);GO:0035556(intracellular signal transduction);GO:0046486(glycerol…	00561(Glycerolipid metabolism);00564(Glycerophospholipid metabolism);04070(Phosphatidylinositol signaling system);05231(Choline metabolism in cancer);05231(Choline metabolism in cancer)	K00901	EC:2.7.1.107	diacylglycerol kinase, gamma [Source:MGI Symbol;Acc:MGI:105060]	0.02	0.01	-0.0142139	0.757724	-0.0131974	0.98947	1	DOWN	No	No
ENSMUSG00000022864	D16Ertd472e	ENSMUST00000114220;ENSMUST00000114219;ENSMUST00000114218	GO:0003674(molecular_function);GO:0008150(biological_process);GO:0005575(cellular_component);GO:0005575(cellular_component)				DNA segment, Chr 16, ERATO Doi 472, expressed [Source:MGI Symbol;Acc:MGI:1196400]	1.86	2.37	0.236733	0.757724	0.673068	0.500904	0.987608	UP	No	No
ENSMUSG00000022871	Fetub	ENSMUST00000170805;ENSMUST00000023587	GO:0004857(enzyme inhibitor activity);GO:0004869(cysteine-type endopeptidase inhibitor activity);GO:0008191(metalloendopeptidase inhibitor activity);GO:0030414(peptidase inhibitor activity);GO:0007338(single fertilization);GO:0007339(binding of sperm to zona pellucida);GO:0010466(negative regulation of peptidase activity);GO:0010951(negative regulation of endopeptidase activity);GO:0005576(extrac…				fetuin beta [Source:MGI Symbol;Acc:MGI:1890221]	0.43	0.31	-0.126448	0.757724	-0.158369	0.874166	1	DOWN	No	No
ENSMUSG00000022883	Robo1	ENSMUST00000023600	GO:0009986(cell surface);GO:0005886(plasma membrane);GO:0005737(cytoplasm);GO:0070100(negative regulation of chemokine-mediated signaling pathway);GO:0050925(negative regulation of negative chemotaxis);GO:0050772(positive regulation of axonogenesis);GO:0035385(Roundabout signaling pathway);GO:0035025(positive regulation of Rho protein signal transduction);GO:0033600(negative regulation of mammary…	04360(Axon guidance)			roundabout guidance receptor 1 [Source:MGI Symbol;Acc:MGI:1274781]	0.14	0.02	-0.160465	0.757724	-0.158369	0.874166	1	DOWN	No	No
ENSMUSG00000022900	Ildr1	ENSMUST00000023617;ENSMUST00000128084	GO:0070506(high-density lipoprotein particle receptor activity);GO:0006898(receptor-mediated endocytosis);GO:0040012(regulation of locomotion);GO:0090277(positive regulation of peptide hormone secretion);GO:0005886(plasma membrane);GO:0016020(membrane);GO:0016021(integral component of membrane);GO:0061689(tricellular tight junction);GO:0061689(tricellular tight junction)				immunoglobulin-like domain containing receptor 1 [Source:MGI Symbol;Acc:MGI:2146574]	0.07	0.05	-0.0272215	0.757724	-0.0263948	0.978942	1	DOWN	No	No
ENSMUSG00000022902	Stfa2	ENSMUST00000023619	GO:0004866(endopeptidase inhibitor activity);GO:0004869(cysteine-type endopeptidase inhibitor activity);GO:0030414(peptidase inhibitor activity);GO:0010466(negative regulation of peptidase activity);GO:0010951(negative regulation of endopeptidase activity);GO:0005575(cellular_component);GO:0005622(intracellular);GO:0005737(cytoplasm)				stefin A2 [Source:MGI Symbol;Acc:MGI:106197]	0	0.19	0.250962	0.757724	0.250751	0.802007	1	UP	No	No
ENSMUSG00000022948	Setd4	ENSMUST00000123756;ENSMUST00000140619;ENSMUST00000152520;ENSMUST00000113951;ENSMUST00000141789;ENSMUST00000156298;ENSMUST00000154355					SET domain containing 4 [Source:MGI Symbol;Acc:MGI:2136890]	0.82	0.56	-0.222392	0.757724	-0.343133	0.731499	1	DOWN	No	No
ENSMUSG00000022949	Clic6	ENSMUST00000162181;ENSMUST00000023670	GO:0005244(voltage-gated ion channel activity);GO:0005254(chloride channel activity);GO:0006810(transport);GO:0006811(ion transport);GO:0006821(chloride transport);GO:0034765(regulation of ion transmembrane transport);GO:1902476(chloride transmembrane transport);GO:0005737(cytoplasm);GO:0005886(plasma membrane);GO:0016020(membrane);GO:0016021(integral component of membrane);GO:0034707(chloride ch…				chloride intracellular channel 6 [Source:MGI Symbol;Acc:MGI:2146607]	0	0.04	0.0565835	0.757724	0.0527896	0.9579	1	UP	No	No
ENSMUSG00000022991	Lalba	ENSMUST00000023726	GO:0005989(lactose biosynthetic process);GO:0005509(calcium ion binding);GO:0004461(lactose synthase activity);GO:0005515(protein binding);GO:0046872(metal ion binding);GO:0005576(extracellular region)	00052(Galactose metabolism)			lactalbumin, alpha [Source:MGI Symbol;Acc:MGI:96742]	0.2	0.18	-0.0242475	0.757724	-0.0263948	0.978942	1	DOWN	No	No
ENSMUSG00000023000	Dhh	ENSMUST00000023737	GO:0005509(calcium ion binding);GO:0008233(peptidase activity);GO:0008270(zinc ion binding);GO:0016787(hydrolase activity);GO:0046872(metal ion binding);GO:0006508(proteolysis);GO:0007267(cell-cell signaling);GO:0007275(multicellular organism development);GO:0016539(intein-mediated protein splicing);GO:0032355(response to estradiol);GO:0042552(myelination);GO:0043627(response to estrogen);GO:0005…	04340(Hedgehog signaling pathway)			desert hedgehog [Source:MGI Symbol;Acc:MGI:94891]	0.31	0.73	0.401205	0.757724	0.554291	0.57938	1	UP	No	No
ENSMUSG00000023011	Faim2	ENSMUST00000023750	GO:0005515(protein binding);GO:0002931(response to ischemia);GO:0006915(apoptotic process);GO:0021549(cerebellum development);GO:0021680(cerebellar Purkinje cell layer development);GO:0021681(cerebellar granular layer development);GO:0021702(cerebellar Purkinje cell differentiation);GO:0043523(regulation of neuron apoptotic process);GO:0043524(negative regulation of neuron apoptotic process);GO:1…				Fas apoptotic inhibitory molecule 2 [Source:MGI Symbol;Acc:MGI:1919643]	0.22	0.09	-0.162553	0.757724	-0.171566	0.863778	1	DOWN	No	No
ENSMUSG00000023032	Slc4a8	ENSMUST00000023776;ENSMUST00000160256;ENSMUST00000162049;ENSMUST00000162805;ENSMUST00000162744	GO:0005215(transporter activity);GO:0005452(inorganic anion exchanger activity);GO:0008509(anion transmembrane transporter activity);GO:0015297(antiporter activity);GO:0015301(anion:anion antiporter activity);GO:0006810(transport);GO:0006811(ion transport);GO:0006814(sodium ion transport);GO:0006820(anion transport);GO:0015698(inorganic anion transport);GO:0015701(bicarbonate transport);GO:005145…				solute carrier family 4 (anion exchanger), member 8 [Source:MGI Symbol;Acc:MGI:1928745]	0.14	0.06	-0.10497	0.757724	-0.105579	0.915916	1	DOWN	No	No
ENSMUSG00000023033	Scn8a	ENSMUST00000108909;ENSMUST00000096198;ENSMUST00000202971	GO:0016021(integral component of membrane);GO:0016020(membrane);GO:0001518(voltage-gated sodium channel complex);GO:0060078(regulation of postsynaptic membrane potential);GO:0055085(transmembrane transport);GO:0035725(sodium ion transmembrane transport);GO:0034220(ion transmembrane transport);GO:0006814(sodium ion transport);GO:0006811(ion transport);GO:0005248(voltage-gated sodium channel activi…				sodium channel, voltage-gated, type VIII, alpha [Source:MGI Symbol;Acc:MGI:103169]	0.05	0.01	-0.056034	0.757724	-0.0527896	0.9579	1	DOWN	No	No
ENSMUSG00000023083	H2-M10.2	ENSMUST00000023845	GO:0005102(receptor binding);GO:0042605(peptide antigen binding);GO:0002474(antigen processing and presentation of peptide antigen via MHC class I);GO:0005886(plasma membrane);GO:0016020(membrane);GO:0016021(integral component of membrane)	04144(Endocytosis);04145(Phagosome);04514(Cell adhesion molecules (CAMs));04612(Antigen processing and presentation);04650(Natural killer cell mediated cytotoxicity);04940(Type I diabetes mellitus);05166(HTLV-I infection);05168(Herpes simplex infection);05169(Epstein-Barr virus infection);05203(Viral carcinogenesis);05320(Autoimmune thyroid disease);05330(Allograft rejection);05332(Graft-versus-h…			histocompatibility 2, M region locus 10.2 [Source:MGI Symbol;Acc:MGI:1276525]	0.02	0	-0.0285692	0.757724	-0.0263948	0.978942	1	DOWN	No	No
ENSMUSG00000023176	Cpn2	ENSMUST00000064856	GO:0003674(molecular_function);GO:0008150(biological_process);GO:0005576(extracellular region);GO:0070062(extracellular exosome);GO:0072562(blood microparticle)				carboxypeptidase N, polypeptide 2 [Source:MGI Symbol;Acc:MGI:1919006]	0.02	0	-0.0285692	0.757724	-0.0263948	0.978942	1	DOWN	No	No
ENSMUSG00000023216	Epb42	ENSMUST00000102490;ENSMUST00000147444	GO:0003810(protein-glutamine gamma-glutamyltransferase activity);GO:0000902(cell morphogenesis);GO:0008360(regulation of cell shape);GO:0018149(peptide cross-linking);GO:0020027(hemoglobin metabolic process);GO:0043249(erythrocyte maturation);GO:0048536(spleen development);GO:0050801(ion homeostasis);GO:0055072(iron ion homeostasis);GO:0005737(cytoplasm);GO:0005856(cytoskeleton);GO:0005886(plasma…				erythrocyte membrane protein band 4.2 [Source:MGI Symbol;Acc:MGI:95402]	0	0	0	0.757724	0				No	No
ENSMUSG00000023243	Kcnk5	ENSMUST00000024011	GO:0005249(voltage-gated potassium channel activity);GO:0005267(potassium channel activity);GO:0006810(transport);GO:0006811(ion transport);GO:0071804(cellular potassium ion transport);GO:0071805(potassium ion transmembrane transport);GO:0016020(membrane);GO:0016021(integral component of membrane)	04974(Protein digestion and absorption)			potassium channel, subfamily K, member 5 [Source:MGI Symbol;Acc:MGI:1336175]	0.14	0.23	0.109624	0.757724	0.118777	0.905452	1	UP	No	No
ENSMUSG00000023267	Gabrr2	ENSMUST00000108162	GO:0004890(GABA-A receptor activity);GO:0005230(extracellular ligand-gated ion channel activity);GO:0005254(chloride channel activity);GO:0006810(transport);GO:0006811(ion transport);GO:0006821(chloride transport);GO:0007214(gamma-aminobutyric acid signaling pathway);GO:0007601(visual perception);GO:0034220(ion transmembrane transport);GO:1902476(chloride transmembrane transport);GO:0005886(plasm…	04080(Neuroactive ligand-receptor interaction);04723(Retrograde endocannabinoid signaling);04727(GABAergic synapse);05032(Morphine addiction);05033(Nicotine addiction)			gamma-aminobutyric acid (GABA) C receptor, subunit rho 2 [Source:MGI Symbol;Acc:MGI:95626]	0.03	0.02	-0.0140752	0.757724	-0.0131974	0.98947	1	DOWN	No	No
ENSMUSG00000023274	Cd4	ENSMUST00000024044;ENSMUST00000145818;ENSMUST00000151594;ENSMUST00000130378	GO:0001948(glycoprotein binding);GO:0005515(protein binding);GO:0008270(zinc ion binding);GO:0015026(coreceptor activity);GO:0019865(immunoglobulin binding);GO:0019899(enzyme binding);GO:0019901(protein kinase binding);GO:0042289(MHC class II protein binding);GO:0042803(protein homodimerization activity);GO:1990782(protein tyrosine kinase binding);GO:0001816(cytokine production);GO:0002250(adapti…	04514(Cell adhesion molecules (CAMs));04612(Antigen processing and presentation);04640(Hematopoietic cell lineage);04660(T cell receptor signaling pathway);05340(Primary immunodeficiency);05340(Primary immunodeficiency)			CD4 antigen [Source:MGI Symbol;Acc:MGI:88335]	0.81	0.69	-0.0989665	0.757724	-0.158369	0.874166	1	DOWN	No	No
ENSMUSG00000023279	Bmp15	ENSMUST00000024049	GO:0005125(cytokine activity);GO:0005160(transforming growth factor beta receptor binding);GO:0008083(growth factor activity);GO:0001541(ovarian follicle development);GO:0010862(positive regulation of pathway-restricted SMAD protein phosphorylation);GO:0030509(BMP signaling pathway);GO:0042981(regulation of apoptotic process);GO:0043408(regulation of MAPK cascade);GO:0045893(positive regulation o…	04913(Ovarian Steroidogenesis)			bone morphogenetic protein 15 [Source:MGI Symbol;Acc:MGI:1316745]	0	0.04	0.0565835	0.757724	0.0527896	0.9579	1	UP	No	No
ENSMUSG00000023284	Zfp605	ENSMUST00000112528;ENSMUST00000144089;ENSMUST00000147631;ENSMUST00000086686	GO:0005622(intracellular);GO:0005575(cellular_component);GO:0006355(regulation of transcription, DNA-templated);GO:0046872(metal ion binding);GO:0003700(transcription factor activity, sequence-specific DNA binding);GO:0003676(nucleic acid binding);GO:0003676(nucleic acid binding)				zinc finger protein 605 [Source:MGI Symbol;Acc:MGI:2444933]	0.33	0.31	-0.0218594	0.757724	-0.0263948	0.978942	1	DOWN	No	No
ENSMUSG00000023393	Slc17a9	ENSMUST00000094218;ENSMUST00000151882;ENSMUST00000139817;ENSMUST00000154882;ENSMUST00000140955	GO:0005215(transporter activity);GO:0022857(transmembrane transporter activity);GO:0006810(transport);GO:0006820(anion transport);GO:0006887(exocytosis);GO:0055085(transmembrane transport);GO:1903146(regulation of mitophagy);GO:1903955(positive regulation of protein targeting to mitochondrion);GO:0016020(membrane);GO:0016021(integral component of membrane);GO:0016021(integral component of membran…				solute carrier family 17, member 9 [Source:MGI Symbol;Acc:MGI:1919107]	0.33	0.58	0.248498	0.757724	0.329935	0.741449	1	UP	No	No
ENSMUSG00000023439	Gnb3	ENSMUST00000024206;ENSMUST00000140233	GO:0030507(spectrin binding);GO:0051020(GTPase binding);GO:0007165(signal transduction);GO:0043005(neuron projection);GO:0044297(cell body);GO:0070062(extracellular exosome);GO:0003924(GTPase activity);GO:0004871(signal transducer activity);GO:0007186(G-protein coupled receptor signaling pathway);GO:0005834(heterotrimeric G-protein complex);GO:0030425(dendrite);GO:0030425(dendrite)	04014(Ras signaling pathway);04062(Chemokine signaling pathway);04151(PI3K-Akt signaling pathway);04713(Circadian entrainment);04723(Retrograde endocannabinoid signaling);04724(Glutamatergic synapse);04725(Cholinergic synapse);04726(Serotonergic synapse);04727(GABAergic synapse);04728(Dopaminergic synapse);04742(Taste transduction);05032(Morphine addiction);05034(Alcoholism);05200(Pathways in can…			guanine nucleotide binding protein (G protein), beta 3 [Source:MGI Symbol;Acc:MGI:95785]	0	0	0	0.757724	0				No	No
ENSMUSG00000023443	Esx1	ENSMUST00000113066;ENSMUST00000155283	GO:0005634(nucleus);GO:0060716(labyrinthine layer blood vessel development);GO:0060713(labyrinthine layer morphogenesis);GO:0006357(regulation of transcription from RNA polymerase II promoter);GO:0006355(regulation of transcription, DNA-templated);GO:0001568(blood vessel development);GO:0043565(sequence-specific DNA binding);GO:0003677(DNA binding);GO:0003677(DNA binding)	04550(Signaling pathways regulating pluripotency of stem cells);04550(Signaling pathways regulating pluripotency of stem cells)			extraembryonic, spermatogenesis, homeobox 1 [Source:MGI Symbol;Acc:MGI:1096388]	0.58	1.55	0.690573	0.757724	1.28015	0.200493	0.480249	UP	No	No
ENSMUSG00000023781	Hes7	ENSMUST00000024543	GO:0003677(DNA binding);GO:0008134(transcription factor binding);GO:0046983(protein dimerization activity);GO:0000122(negative regulation of transcription from RNA polymerase II promoter);GO:0001501(skeletal system development);GO:0001756(somitogenesis);GO:0006351(transcription, DNA-templated);GO:0006355(regulation of transcription, DNA-templated);GO:0007219(Notch signaling pathway);GO:0007275(mu…				hairy and enhancer of split 7 (Drosophila) [Source:MGI Symbol;Acc:MGI:2135679]	1.56	1.34	-0.129635	0.757724	-0.290343	0.771554	1	DOWN	No	No
ENSMUSG00000023828	Slc22a3	ENSMUST00000024595	GO:0005215(transporter activity);GO:0005329(dopamine transmembrane transporter activity);GO:0015101(organic cation transmembrane transporter activity);GO:0015651(quaternary ammonium group transmembrane transporter activity);GO:0019534(toxin transporter activity);GO:0022857(transmembrane transporter activity);GO:0015695(organic cation transport);GO:0015697(quaternary ammonium group transport);GO:0…	05231(Choline metabolism in cancer)			solute carrier family 22 (organic cation transporter), member 3 [Source:MGI Symbol;Acc:MGI:1333817]	0	0	0	0.757724	0				No	No
ENSMUSG00000023873	1700010I14Rik	ENSMUST00000024650;ENSMUST00000151609;ENSMUST00000136954	GO:0003674(molecular_function);GO:0008150(biological_process);GO:0005575(cellular_component);GO:0005575(cellular_component)				RIKEN cDNA 1700010I14 gene [Source:MGI Symbol;Acc:MGI:1914181]	0.28	0.1	-0.21864	0.757724	-0.237553	0.812228	1	DOWN	No	No
ENSMUSG00000023902	Zscan10	ENSMUST00000095595	GO:0003676(nucleic acid binding);GO:0003677(DNA binding);GO:0003700(transcription factor activity, sequence-specific DNA binding);GO:0005515(protein binding);GO:0043565(sequence-specific DNA binding);GO:0046872(metal ion binding);GO:0006351(transcription, DNA-templated);GO:0006355(regulation of transcription, DNA-templated);GO:0045892(negative regulation of transcription, DNA-templated);GO:004886…				zinc finger and SCAN domain containing 10 [Source:MGI Symbol;Acc:MGI:3040700]	0	0	0	0.757724	0				No	No
ENSMUSG00000023903	Mmp25	ENSMUST00000024696	GO:0004222(metalloendopeptidase activity);GO:0005509(calcium ion binding);GO:0008233(peptidase activity);GO:0008237(metallopeptidase activity);GO:0008270(zinc ion binding);GO:0016504(peptidase activator activity);GO:0016787(hydrolase activity);GO:0046872(metal ion binding);GO:0006508(proteolysis);GO:0006954(inflammatory response);GO:0010952(positive regulation of peptidase activity);GO:0060022(ha…				matrix metallopeptidase 25 [Source:MGI Symbol;Acc:MGI:2443938]	0.73	0.57	-0.140007	0.757724	-0.211159	0.832764	1	DOWN	No	No
ENSMUSG00000023914	Mep1a	ENSMUST00000117137	GO:0004222(metalloendopeptidase activity);GO:0008233(peptidase activity);GO:0008237(metallopeptidase activity);GO:0008270(zinc ion binding);GO:0016787(hydrolase activity);GO:0046872(metal ion binding);GO:0006508(proteolysis);GO:0016020(membrane);GO:0016021(integral component of membrane);GO:0070062(extracellular exosome);GO:0017090(meprin A complex)	04974(Protein digestion and absorption)			meprin 1 alpha [Source:MGI Symbol;Acc:MGI:96963]	0	0	0	0.757724	0				No	No
ENSMUSG00000023918	Adgrf4	ENSMUST00000024711	GO:0016021(integral component of membrane);GO:0016020(membrane);GO:0007186(G-protein coupled receptor signaling pathway);GO:0007166(cell surface receptor signaling pathway);GO:0004930(G-protein coupled receptor activity);GO:0004888(transmembrane signaling receptor activity)				adhesion G protein-coupled receptor F4 [Source:MGI Symbol;Acc:MGI:1925499]	0.02	0.03	0.0140752	0.757724	0.0131974	0.98947	1	UP	No	No
ENSMUSG00000023926	Rhag	ENSMUST00000024721	GO:0008519(ammonium transmembrane transporter activity);GO:0022840(leak channel activity);GO:0030506(ankyrin binding);GO:0006810(transport);GO:0006873(cellular ion homeostasis);GO:0015670(carbon dioxide transport);GO:0015672(monovalent inorganic cation transport);GO:0015695(organic cation transport);GO:0015696(ammonium transport);GO:0048821(erythrocyte development);GO:0060586(multicellular organi…				Rhesus blood group-associated A glycoprotein [Source:MGI Symbol;Acc:MGI:1202713]	0	0	0	0.757724	0				No	No
ENSMUSG00000023927	Satb1	ENSMUST00000144331;ENSMUST00000176669;ENSMUST00000152830;ENSMUST00000140979;ENSMUST00000137697;ENSMUST00000146414	GO:0000977(RNA polymerase II regulatory region sequence-specific DNA binding);GO:0001227(transcriptional repressor activity, RNA polymerase II transcription regulatory region sequence-specific binding);GO:0003677(DNA binding);GO:0003682(chromatin binding);GO:0003700(transcription factor activity, sequence-specific DNA binding);GO:0043565(sequence-specific DNA binding);GO:0000122(negative regulati…				special AT-rich sequence binding protein 1 [Source:MGI Symbol;Acc:MGI:105084]	0.09	0.14	0.0647057	0.757724	0.065987	0.947388	1	UP	No	No
ENSMUSG00000023931	Efhb	ENSMUST00000024725	GO:0005509(calcium ion binding);GO:0046872(metal ion binding);GO:0008150(biological_process);GO:0005575(cellular_component)				EF hand domain family, member B [Source:MGI Symbol;Acc:MGI:3045296]	0.82	0.39	-0.388854	0.757724	-0.567489	0.570382	1	DOWN	No	No
ENSMUSG00000023959	Clic5	ENSMUST00000024755	GO:0005244(voltage-gated ion channel activity);GO:0005254(chloride channel activity);GO:0002021(response to dietary excess);GO:0002024(diet induced thermogenesis);GO:0006810(transport);GO:0006811(ion transport);GO:0006821(chloride transport);GO:0007605(sensory perception of sound);GO:0008104(protein localization);GO:0034765(regulation of ion transmembrane transport);GO:0050885(neuromuscular proce…				chloride intracellular channel 5 [Source:MGI Symbol;Acc:MGI:1917912]	0.18	0.06	-0.154723	0.757724	-0.158369	0.874166	1	DOWN	No	No
ENSMUSG00000023964	Calcr	ENSMUST00000075644	GO:0004871(signal transducer activity);GO:0004872(receptor activity);GO:0004888(transmembrane signaling receptor activity);GO:0004930(G-protein coupled receptor activity);GO:0004948(calcitonin receptor activity);GO:0008565(protein transporter activity);GO:0007165(signal transduction);GO:0007166(cell surface receptor signaling pathway);GO:0007186(G-protein coupled receptor signaling pathway);GO:00…	04080(Neuroactive ligand-receptor interaction);04380(Osteoclast differentiation)			calcitonin receptor [Source:MGI Symbol;Acc:MGI:101950]	0	0	0	0.757724	0				No	No
ENSMUSG00000023968	Crip3	ENSMUST00000113465;ENSMUST00000164180;ENSMUST00000024764;ENSMUST00000165993;ENSMUST00000165811;ENSMUST00000169441;ENSMUST00000165750	GO:0046872(metal ion binding);GO:0008270(zinc ion binding);GO:0003674(molecular_function);GO:0042098(T cell proliferation);GO:0005737(cytoplasm);GO:0005737(cytoplasm)				cysteine-rich protein 3 [Source:MGI Symbol;Acc:MGI:2152434]	0.05	0.06	0.0136749	0.757724	0.0131974	0.98947	1	UP	No	No
ENSMUSG00000023979	Guca1b	ENSMUST00000024774;ENSMUST00000145462	GO:0005509(calcium ion binding);GO:0008048(calcium sensitive guanylate cyclase activator activity);GO:0030249(guanylate cyclase regulator activity);GO:0046872(metal ion binding);GO:0007601(visual perception);GO:0007602(phototransduction);GO:0031282(regulation of guanylate cyclase activity);GO:0031284(positive regulation of guanylate cyclase activity);GO:0050896(response to stimulus);GO:0001750(ph…	04740(Olfactory transduction);04744(Phototransduction);04744(Phototransduction)			guanylate cyclase activator 1B [Source:MGI Symbol;Acc:MGI:1194489]	0.56	0.56	0	0.757724	0	1	1		No	No
ENSMUSG00000023993	Treml1	ENSMUST00000024792	GO:0004872(receptor activity);GO:0009968(negative regulation of signal transduction);GO:0019722(calcium-mediated signaling);GO:0030168(platelet activation);GO:0042060(wound healing);GO:0005737(cytoplasm);GO:0005886(plasma membrane);GO:0009986(cell surface);GO:0016020(membrane);GO:0016021(integral component of membrane);GO:0031091(platelet alpha granule)				triggering receptor expressed on myeloid cells-like 1 [Source:MGI Symbol;Acc:MGI:1918576]	0.19	0.07	-0.153351	0.757724	-0.158369	0.874166	1	DOWN	No	No
ENSMUSG00000023995	Tspo2	ENSMUST00000159478;ENSMUST00000024794	GO:0015485(cholesterol binding);GO:0006810(transport);GO:0008150(biological_process);GO:0005783(endoplasmic reticulum);GO:0005789(endoplasmic reticulum membrane);GO:0016020(membrane);GO:0016021(integral component of membrane);GO:0016021(integral component of membrane)				translocator protein 2 [Source:MGI Symbol;Acc:MGI:1917276]	0.02	0	-0.0285692	0.757724	-0.0263948	0.978942	1	DOWN	No	No
ENSMUSG00000023999	Kif6	ENSMUST00000024798;ENSMUST00000162854	GO:0005874(microtubule);GO:0005871(kinesin complex);GO:0001673(male germ cell nucleus);GO:0007018(microtubule-based movement);GO:0016887(ATPase activity);GO:0008017(microtubule binding);GO:0005524(ATP binding);GO:0003777(microtubule motor activity);GO:0003774(motor activity);GO:0000166(nucleotide binding);GO:0000166(nucleotide binding)				kinesin family member 6 [Source:MGI Symbol;Acc:MGI:1098238]	0	0	0	0.757724	0				No	No
ENSMUSG00000024008	Cpne5	ENSMUST00000024805;ENSMUST00000124917	GO:0003674(molecular_function);GO:0030154(cell differentiation);GO:1903861(positive regulation of dendrite extension);GO:0042995(cell projection);GO:0043005(neuron projection);GO:0043025(neuronal cell body);GO:0043204(perikaryon);GO:0070062(extracellular exosome);GO:0070062(extracellular exosome)				copine V [Source:MGI Symbol;Acc:MGI:2385908]	0.01	0	-0.0143553	0.757724	-0.0131974	0.98947	1	DOWN	No	No
ENSMUSG00000024027	Glp1r	ENSMUST00000114574	GO:0004871(signal transducer activity);GO:0004872(receptor activity);GO:0004888(transmembrane signaling receptor activity);GO:0004930(G-protein coupled receptor activity);GO:0004967(glucagon receptor activity);GO:0008528(G-protein coupled peptide receptor activity);GO:0006950(response to stress);GO:0007165(signal transduction);GO:0007166(cell surface receptor signaling pathway);GO:0007186(G-prote…	04024(cAMP signaling pathway);04080(Neuroactive ligand-receptor interaction);04911(Insulin secretion)			glucagon-like peptide 1 receptor [Source:MGI Symbol;Acc:MGI:99571]	0.08	0.14	0.0780025	0.757724	0.0791845	0.936886	1	UP	No	No
ENSMUSG00000024033	Rsph1	ENSMUST00000024832	GO:0035082(axoneme assembly);GO:0005634(nucleus);GO:0005829(cytosol);GO:0031514(motile cilium);GO:0003674(molecular_function);GO:0007286(spermatid development);GO:0051321(meiotic cell cycle);GO:0000794(condensed nuclear chromosome);GO:0001520(outer dense fiber);GO:0005694(chromosome);GO:0005737(cytoplasm);GO:0005929(cilium);GO:0036126(sperm flagellum);GO:0042995(cell projection);GO:0072687(meioti…				radial spoke head 1 homolog (Chlamydomonas) [Source:MGI Symbol;Acc:MGI:1194909]	0	0.14	0.189034	0.757724	0.184764	0.853414	1	UP	No	No
ENSMUSG00000024034	Tmprss3	ENSMUST00000114549	GO:0004252(serine-type endopeptidase activity);GO:0005044(scavenger receptor activity);GO:0008233(peptidase activity);GO:0008236(serine-type peptidase activity);GO:0016787(hydrolase activity);GO:0017080(sodium channel regulator activity);GO:0006508(proteolysis);GO:0006883(cellular sodium ion homeostasis);GO:0006898(receptor-mediated endocytosis);GO:0007605(sensory perception of sound);GO:0005783(…				transmembrane protease, serine 3 [Source:MGI Symbol;Acc:MGI:2155445]	0.04	0.01	-0.0422282	0.757724	-0.0395922	0.968418	1	DOWN	No	No
ENSMUSG00000024036	Slc37a1	ENSMUST00000171233;ENSMUST00000165149	GO:0005215(transporter activity);GO:0015297(antiporter activity);GO:0061513(glucose 6-phosphate:inorganic phosphate antiporter activity);GO:0006810(transport);GO:0008643(carbohydrate transport);GO:0015760(glucose-6-phosphate transport);GO:0035435(phosphate ion transmembrane transport);GO:0055085(transmembrane transport);GO:0005783(endoplasmic reticulum);GO:0005789(endoplasmic reticulum membrane);…				solute carrier family 37 (glycerol-3-phosphate transporter), member 1 [Source:MGI Symbol;Acc:MGI:2446181]	0.29	0.1	-0.229868	0.757724	-0.250751	0.802007	1	DOWN	No	No
ENSMUSG00000024039	Cbs	ENSMUST00000067801;ENSMUST00000078509	GO:0004122(cystathionine beta-synthase activity);GO:0016829(lyase activity);GO:0019825(oxygen binding);GO:0019899(enzyme binding);GO:0020037(heme binding);GO:0030170(pyridoxal phosphate binding);GO:0031625(ubiquitin protein ligase binding);GO:0042802(identical protein binding);GO:0042803(protein homodimerization activity);GO:0046872(metal ion binding);GO:0050421(nitrite reductase (NO-forming) act…	00260(Glycine, serine and threonine metabolism);00270(Cysteine and methionine metabolism);01230(Biosynthesis of amino acids);01230(Biosynthesis of amino acids)	K01697	EC:4.2.1.22	cystathionine beta-synthase [Source:MGI Symbol;Acc:MGI:88285]	0.05	0.05	0	0.757724	0	1	1		No	No
ENSMUSG00000024041	Cryaa	ENSMUST00000019192	GO:0005212(structural constituent of eye lens);GO:0005515(protein binding);GO:0042802(identical protein binding);GO:0046872(metal ion binding);GO:0051082(unfolded protein binding);GO:0001666(response to hypoxia);GO:0001934(positive regulation of protein phosphorylation);GO:0002088(lens development in camera-type eye);GO:0002089(lens morphogenesis in camera-type eye);GO:0006457(protein folding);GO…	04141(Protein processing in endoplasmic reticulum)			crystallin, alpha A [Source:MGI Symbol;Acc:MGI:88515]	0	0.05	0.0703893	0.757724	0.065987	0.947388	1	UP	No	No
ENSMUSG00000024065	Ehd3	ENSMUST00000024860	GO:0000166(nucleotide binding);GO:0005509(calcium ion binding);GO:0005515(protein binding);GO:0005524(ATP binding);GO:0005525(GTP binding);GO:0008289(lipid binding);GO:0046872(metal ion binding);GO:0001881(receptor recycling);GO:0006810(transport);GO:0015031(protein transport);GO:0030030(cell projection organization);GO:0032456(endocytic recycling);GO:0034498(early endosome to Golgi transport);GO…	04144(Endocytosis)			EH-domain containing 3 [Source:MGI Symbol;Acc:MGI:1928900]	0.24	0.21	-0.0353331	0.757724	-0.0395922	0.968418	1	DOWN	No	No
ENSMUSG00000024076	Vit	ENSMUST00000024880	GO:0005539(glycosaminoglycan binding);GO:0010811(positive regulation of cell-substrate adhesion);GO:0030198(extracellular matrix organization);GO:0005576(extracellular region);GO:0005578(proteinaceous extracellular matrix);GO:0005614(interstitial matrix)				vitrin [Source:MGI Symbol;Acc:MGI:1921449]	0.03	0	-0.0426443	0.757724	-0.0395922	0.968418	1	DOWN	No	No
ENSMUSG00000024112	Cacna1h	ENSMUST00000159610;ENSMUST00000159331;ENSMUST00000162820;ENSMUST00000159623	GO:0016021(integral component of membrane);GO:0016020(membrane);GO:0005891(voltage-gated calcium channel complex);GO:0070588(calcium ion transmembrane transport);GO:0070509(calcium ion import);GO:0055085(transmembrane transport);GO:0006811(ion transport);GO:0008332(low voltage-gated calcium channel activity);GO:0005245(voltage-gated calcium channel activity);GO:0005216(ion channel activity);GO:00…	04010(MAPK signaling pathway);04020(Calcium signaling pathway);04713(Circadian entrainment);04713(Circadian entrainment)			calcium channel, voltage-dependent, T type, alpha 1H subunit [Source:MGI Symbol;Acc:MGI:1928842]	0.02	0.03	0.0140752	0.757724	0.0131974	0.98947	1	UP	No	No
ENSMUSG00000024114	Prss41	ENSMUST00000122936;ENSMUST00000024926;ENSMUST00000151797;ENSMUST00000141788	GO:0006508(proteolysis);GO:0016787(hydrolase activity);GO:0008236(serine-type peptidase activity);GO:0008233(peptidase activity);GO:0004252(serine-type endopeptidase activity);GO:0017080(sodium channel regulator activity);GO:0005886(plasma membrane);GO:0016020(membrane);GO:0019897(extrinsic component of plasma membrane);GO:0031225(anchored component of membrane);GO:0043229(intracellular organelle…				protease, serine 41 [Source:MGI Symbol;Acc:MGI:1918253]	0.01	0	-0.0143553	0.757724	-0.0131974	0.98947	1	DOWN	No	No
ENSMUSG00000024124	Prss30	ENSMUST00000024936;ENSMUST00000135549;ENSMUST00000123584;ENSMUST00000151448	GO:0004252(serine-type endopeptidase activity);GO:0008233(peptidase activity);GO:0008236(serine-type peptidase activity);GO:0016787(hydrolase activity);GO:0017080(sodium channel regulator activity);GO:0006508(proteolysis);GO:0006810(transport);GO:0006811(ion transport);GO:0006814(sodium ion transport);GO:0005886(plasma membrane);GO:0016020(membrane);GO:0031225(anchored component of membrane);GO:0…				protease, serine 30 [Source:MGI Symbol;Acc:MGI:1353645]	0.07	0.11	0.0529489	0.757724	0.0527896	0.9579	1	UP	No	No
ENSMUSG00000024134	Six2	ENSMUST00000163568	GO:0000978(RNA polymerase II core promoter proximal region sequence-specific DNA binding);GO:0001077(transcriptional activator activity, RNA polymerase II core promoter proximal region sequence-specific binding);GO:0003677(DNA binding);GO:0003700(transcription factor activity, sequence-specific DNA binding);GO:0005515(protein binding);GO:0008134(transcription factor binding);GO:0032403(protein co…				sine oculis-related homeobox 2 [Source:MGI Symbol;Acc:MGI:102778]	0	0.02	0.0285692	0.757724	0.0263948	0.978942	1	UP	No	No
ENSMUSG00000024154	Gtf2a1l	ENSMUST00000024970	GO:0003713(transcription coactivator activity);GO:0003677(DNA binding);GO:0005515(protein binding);GO:0006351(transcription, DNA-templated);GO:0006355(regulation of transcription, DNA-templated);GO:0006366(transcription from RNA polymerase II promoter);GO:0006367(transcription initiation from RNA polymerase II promoter);GO:0050890(cognition);GO:0005634(nucleus);GO:0005672(transcription factor TFI…	03022(Basal transcription factors);05203(Viral carcinogenesis)			general transcription factor IIA, 1-like [Source:MGI Symbol;Acc:MGI:1919078]	0.04	0	-0.0565835	0.757724	-0.0527896	0.9579	1	DOWN	No	No
ENSMUSG00000024211	Grm8	ENSMUST00000115323	GO:0004871(signal transducer activity);GO:0004930(G-protein coupled receptor activity);GO:0008066(glutamate receptor activity);GO:0007165(signal transduction);GO:0007186(G-protein coupled receptor signaling pathway);GO:0007196(adenylate cyclase-inhibiting G-protein coupled glutamate receptor signaling pathway);GO:0030818(negative regulation of cAMP biosynthetic process);GO:0005886(plasma membrane…	04080(Neuroactive ligand-receptor interaction);04724(Glutamatergic synapse)			glutamate receptor, metabotropic 8 [Source:MGI Symbol;Acc:MGI:1351345]	0.01	0	-0.0143553	0.757724	-0.0131974	0.98947	1	DOWN	No	No
ENSMUSG00000024232	Bambi	ENSMUST00000025075	GO:0005109(frizzled binding);GO:0007179(transforming growth factor beta receptor signaling pathway);GO:0008284(positive regulation of cell proliferation);GO:0008360(regulation of cell shape);GO:0010718(positive regulation of epithelial to mesenchymal transition);GO:0016477(cell migration);GO:0030512(negative regulation of transforming growth factor beta receptor signaling pathway);GO:0032092(posi…	04310(Wnt signaling pathway);04350(TGF-beta signaling pathway)			BMP and activin membrane-bound inhibitor [Source:MGI Symbol;Acc:MGI:1915260]	0.19	0.3	0.12755	0.757724	0.145172	0.884575	1	UP	No	No
ENSMUSG00000024261	Syt4	ENSMUST00000025110	GO:0000149(SNARE binding);GO:0001786(phosphatidylserine binding);GO:0005509(calcium ion binding);GO:0005544(calcium-dependent phospholipid binding);GO:0017075(syntaxin-1 binding);GO:0019905(syntaxin binding);GO:0030276(clathrin binding);GO:0030348(syntaxin-3 binding);GO:0042803(protein homodimerization activity);GO:0046872(metal ion binding);GO:0046982(protein heterodimerization activity);GO:0006…				synaptotagmin IV [Source:MGI Symbol;Acc:MGI:101759]	0.01	0	-0.0143553	0.757724	-0.0131974	0.98947	1	DOWN	No	No
ENSMUSG00000024274	Zscan30	ENSMUST00000115829	GO:0003700(transcription factor activity, sequence-specific DNA binding);GO:0006355(regulation of transcription, DNA-templated);GO:0045944(positive regulation of transcription from RNA polymerase II promoter)				zinc finger and SCAN domain containing 30 [Source:MGI Symbol;Acc:MGI:2685600]	0.23	0	-0.298658	0.757724	-0.30354	0.761478	1	DOWN	No	No
ENSMUSG00000024295	Cyp4f41-ps	ENSMUST00000126790					cytochrome P450, family 4, subfamily f, polypeptide 41 pseudogene [Source:MGI Symbol;Acc:MGI:1925125]	0.23	0.21	-0.0236513	0.757724	-0.0263948	0.978942	1	DOWN	No	No
ENSMUSG00000024331	Dsc2	ENSMUST00000075214;ENSMUST00000039247	GO:0005509(calcium ion binding);GO:0046872(metal ion binding);GO:0007155(cell adhesion);GO:0007156(homophilic cell adhesion via plasma membrane adhesion molecules);GO:0009267(cellular response to starvation);GO:0086042(cardiac muscle cell-cardiac muscle cell adhesion);GO:0086073(bundle of His cell-Purkinje myocyte adhesion involved in cell communication);GO:0086091(regulation of heart rate by car…	05412(Arrhythmogenic right ventricular cardiomyopathy (ARVC));05412(Arrhythmogenic right ventricular cardiomyopathy (ARVC))			desmocollin 2 [Source:MGI Symbol;Acc:MGI:103221]	0.19	0	-0.250962	0.757724	-0.250751	0.802007	1	DOWN	No	No
ENSMUSG00000024334	H2-Oa	ENSMUST00000025192;ENSMUST00000174670	GO:0023026(MHC class II protein complex binding);GO:0002376(immune system process);GO:0002504(antigen processing and presentation of peptide or polysaccharide antigen via MHC class II);GO:0002587(negative regulation of antigen processing and presentation of peptide antigen via MHC class II);GO:0006955(immune response);GO:0019882(antigen processing and presentation);GO:0019886(antigen processing a…	04145(Phagosome);04514(Cell adhesion molecules (CAMs));04612(Antigen processing and presentation);04672(Intestinal immune network for IgA production);04940(Type I diabetes mellitus);05140(Leishmaniasis);05145(Toxoplasmosis);05150(Staphylococcus aureus infection);05152(Tuberculosis);05164(Influenza A);05166(HTLV-I infection);05168(Herpes simplex infection);05310(Asthma);05320(Autoimmune thyroid di…			histocompatibility 2, O region alpha locus [Source:MGI Symbol;Acc:MGI:95924]	0.54	1.08	0.433653	0.757724	0.71266	0.476056	0.951919	UP	No	No
ENSMUSG00000024353	Mzb1	ENSMUST00000025211	GO:0003674(molecular_function);GO:0005515(protein binding);GO:0002642(positive regulation of immunoglobulin biosynthetic process);GO:0008284(positive regulation of cell proliferation);GO:0030888(regulation of B cell proliferation);GO:0033622(integrin activation);GO:0042127(regulation of cell proliferation);GO:2001274(negative regulation of glucose import in response to insulin stimulus);GO:000557…				marginal zone B and B1 cell-specific protein 1 [Source:MGI Symbol;Acc:MGI:1917066]	0.21	0.23	0.0236513	0.757724	0.0263948	0.978942	1	UP	No	No
ENSMUSG00000024376	Epb41l4a	ENSMUST00000025234	GO:0005200(structural constituent of cytoskeleton);GO:0008092(cytoskeletal protein binding);GO:0031032(actomyosin structure organization);GO:0005737(cytoplasm);GO:0005856(cytoskeleton);GO:0019898(extrinsic component of membrane)				erythrocyte membrane protein band 4.1 like 4a [Source:MGI Symbol;Acc:MGI:103007]	0.13	0.14	0.0127111	0.757724	0.0131974	0.98947	1	UP	No	No
ENSMUSG00000024386	Proc	ENSMUST00000171765	GO:0004252(serine-type endopeptidase activity);GO:0005509(calcium ion binding);GO:0008233(peptidase activity);GO:0008236(serine-type peptidase activity);GO:0016787(hydrolase activity);GO:0001889(liver development);GO:0006508(proteolysis);GO:0007596(blood coagulation);GO:0007599(hemostasis);GO:0030195(negative regulation of blood coagulation);GO:0043066(negative regulation of apoptotic process);GO…	04610(Complement and coagulation cascades)			protein C [Source:MGI Symbol;Acc:MGI:97771]	0.29	0.1	-0.229868	0.757724	-0.250751	0.802007	1	DOWN	No	No
ENSMUSG00000024388	Myo7b	ENSMUST00000134663	GO:0000166(nucleotide binding);GO:0003774(motor activity);GO:0003779(actin binding);GO:0005524(ATP binding);GO:0030154(cell differentiation);GO:1904970(brush border assembly);GO:0005737(cytoplasm);GO:0005856(cytoskeleton);GO:0005902(microvillus);GO:0005903(brush border);GO:0016459(myosin complex);GO:0042995(cell projection);GO:0070062(extracellular exosome);GO:0090651(apical cytoplasm)				myosin VIIB [Source:MGI Symbol;Acc:MGI:107709]	0	0	0	0.757724	0				No	No
ENSMUSG00000024391	Apom	ENSMUST00000025249	GO:0005319(lipid transporter activity);GO:0005543(phospholipid binding);GO:0016209(antioxidant activity);GO:0006810(transport);GO:0006869(lipid transport);GO:0009749(response to glucose);GO:0033344(cholesterol efflux);GO:0034375(high-density lipoprotein particle remodeling);GO:0034380(high-density lipoprotein particle assembly);GO:0034384(high-density lipoprotein particle clearance);GO:0034445(ne…				apolipoprotein M [Source:MGI Symbol;Acc:MGI:1930124]	0.16	0.18	0.0246621	0.757724	0.0263948	0.978942	1	UP	No	No
ENSMUSG00000024402	Lta	ENSMUST00000025266	GO:0005125(cytokine activity);GO:0005164(tumor necrosis factor receptor binding);GO:0005515(protein binding);GO:0001666(response to hypoxia);GO:0002876(positive regulation of chronic inflammatory response to antigenic stimulus);GO:0002925(positive regulation of humoral immune response mediated by circulating immunoglobulin);GO:0006954(inflammatory response);GO:0006955(immune response);GO:0006959(…	04060(Cytokine-cytokine receptor interaction);04064(NF-kappa B signaling pathway);04668(TNF signaling pathway);04940(Type I diabetes mellitus);05166(HTLV-I infection);05168(Herpes simplex infection)			lymphotoxin A [Source:MGI Symbol;Acc:MGI:104797]	0.01	0.16	0.19977	0.757724	0.197961	0.843075	1	UP	No	No
ENSMUSG00000024409	Psors1c2	ENSMUST00000025273					psoriasis susceptibility 1 candidate 2 (human) [Source:MGI Symbol;Acc:MGI:1930025]	0.43	1.04	0.512554	0.757724	0.805042	0.420795	0.869227	UP	No	No
ENSMUSG00000024459	H2-M5	ENSMUST00000145260	GO:0016021(integral component of membrane);GO:0016020(membrane);GO:0005886(plasma membrane);GO:0002474(antigen processing and presentation of peptide antigen via MHC class I);GO:0042605(peptide antigen binding);GO:0005102(receptor binding)				histocompatibility 2, M region locus 5 [Source:MGI Symbol;Acc:MGI:95917]	0.12	0	-0.163499	0.757724	-0.158369	0.874166	1	DOWN	No	No
ENSMUSG00000024502	Jakmip2	ENSMUST00000082254	GO:0005794(Golgi apparatus);GO:0008150(biological_process);GO:0019900(kinase binding);GO:0008017(microtubule binding);GO:0003674(molecular_function)				janus kinase and microtubule interacting protein 2 [Source:MGI Symbol;Acc:MGI:1923467]	0.01	0	-0.0143553	0.757724	-0.0131974	0.98947	1	DOWN	No	No
ENSMUSG00000024505	Dtwd2	ENSMUST00000163590;ENSMUST00000025383;ENSMUST00000139852	GO:1903955(positive regulation of protein targeting to mitochondrion);GO:0003674(molecular_function);GO:0005575(cellular_component);GO:0005575(cellular_component)				DTW domain containing 2 [Source:MGI Symbol;Acc:MGI:1916107]	0.4	0.97	0.492769	0.757724	0.752252	0.451899	0.918021	UP	No	No
ENSMUSG00000024511	Rab27b	ENSMUST00000121693;ENSMUST00000069749	GO:0005525(GTP binding);GO:0019003(GDP binding);GO:0019904(protein domain specific binding);GO:0031489(myosin V binding);GO:0007264(small GTPase mediated signal transduction);GO:0017157(regulation of exocytosis);GO:0045921(positive regulation of exocytosis);GO:0071985(multivesicular body sorting pathway);GO:0005795(Golgi stack);GO:0016324(apical plasma membrane);GO:0030140(trans-Golgi network tra…	04972(Pancreatic secretion);04972(Pancreatic secretion)			RAB27B, member RAS oncogene family [Source:MGI Symbol;Acc:MGI:1931295]	0.08	0.48	0.454566	0.757724	0.527896	0.597571	1	UP	No	No
ENSMUSG00000024512	Dynap	ENSMUST00000025390	GO:0003674(molecular_function);GO:0016020(membrane);GO:0016021(integral component of membrane)				dynactin associated protein [Source:MGI Symbol;Acc:MGI:1922827]	0.05	0.15	0.131245	0.757724	0.131974	0.895005	1	UP	No	No
ENSMUSG00000024518	Rax	ENSMUST00000025396	GO:0000978(RNA polymerase II core promoter proximal region sequence-specific DNA binding);GO:0001077(transcriptional activator activity, RNA polymerase II core promoter proximal region sequence-specific binding);GO:0003677(DNA binding);GO:0043565(sequence-specific DNA binding);GO:0006351(transcription, DNA-templated);GO:0006355(regulation of transcription, DNA-templated);GO:0006366(transcription …				retina and anterior neural fold homeobox [Source:MGI Symbol;Acc:MGI:109632]	0	0.02	0.0285692	0.757724	0.0263948	0.978942	1	UP	No	No
ENSMUSG00000024548	Setbp1	ENSMUST00000025430	GO:0003674(molecular_function);GO:0003677(DNA binding);GO:0008150(biological_process);GO:0005634(nucleus);GO:0005829(cytosol);GO:0016604(nuclear body)				SET binding protein 1 [Source:MGI Symbol;Acc:MGI:1933199]	0.07	0.05	-0.0272215	0.757724	-0.0263948	0.978942	1	DOWN	No	No
ENSMUSG00000024552	Slc14a2	ENSMUST00000025434	GO:0016021(integral component of membrane);GO:0016020(membrane);GO:0071918(urea transmembrane transport);GO:0050839(cell adhesion molecule binding);GO:0015204(urea transmembrane transporter activity);GO:0005886(plasma membrane);GO:0006810(transport)				solute carrier family 14 (urea transporter), member 2 [Source:MGI Symbol;Acc:MGI:1351653]	0.11	0.03	-0.107915	0.757724	-0.105579	0.915916	1	DOWN	No	No
ENSMUSG00000024593	Megf10	ENSMUST00000075770	GO:0001849(complement component C1q binding);GO:0005044(scavenger receptor activity);GO:0006898(receptor-mediated endocytosis);GO:0006909(phagocytosis);GO:0007155(cell adhesion);GO:0007517(muscle organ development);GO:0014719(skeletal muscle satellite cell activation);GO:0014816(skeletal muscle satellite cell differentiation);GO:0014841(skeletal muscle satellite cell proliferation);GO:0034109(hom…				multiple EGF-like-domains 10 [Source:MGI Symbol;Acc:MGI:2685177]	0.01	0.04	0.0422282	0.757724	0.0395922	0.968418	1	UP	No	No
ENSMUSG00000024600	Slc27a6	ENSMUST00000025500	GO:0016021(integral component of membrane);GO:0005783(endoplasmic reticulum);GO:0015908(fatty acid transport);GO:0008152(metabolic process);GO:0001676(long-chain fatty acid metabolic process);GO:0031957(very long-chain fatty acid-CoA ligase activity);GO:0004467(long-chain fatty acid-CoA ligase activity);GO:0003824(catalytic activity)	03320(PPAR signaling pathway)			solute carrier family 27 (fatty acid transporter), member 6 [Source:MGI Symbol;Acc:MGI:3036230]	0.12	0	-0.163499	0.757724	-0.158369	0.874166	1	DOWN	No	No
ENSMUSG00000024669	Cd5	ENSMUST00000025571	GO:0005044(scavenger receptor activity);GO:0005515(protein binding);GO:0006898(receptor-mediated endocytosis);GO:0031295(T cell costimulation);GO:0097190(apoptotic signaling pathway);GO:0005886(plasma membrane);GO:0009897(external side of plasma membrane);GO:0016020(membrane);GO:0016021(integral component of membrane)	04640(Hematopoietic cell lineage)			CD5 antigen [Source:MGI Symbol;Acc:MGI:88340]	0.76	0.57	-0.164811	0.757724	-0.250751	0.802007	1	DOWN	No	No
ENSMUSG00000024670	Cd6	ENSMUST00000080292;ENSMUST00000025572;ENSMUST00000039043;ENSMUST00000173613	GO:0042101(T cell receptor complex);GO:0001530(lipopolysaccharide binding);GO:0005044(scavenger receptor activity);GO:0005515(protein binding);GO:0070891(lipoteichoic acid binding);GO:0001771(immunological synapse formation);GO:0002438(acute inflammatory response to antigenic stimulus);GO:0006898(receptor-mediated endocytosis);GO:0007155(cell adhesion);GO:0007157(heterophilic cell-cell adhesion v…	04514(Cell adhesion molecules (CAMs));04514(Cell adhesion molecules (CAMs))			CD6 antigen [Source:MGI Symbol;Acc:MGI:103566]	0.56	0.45	-0.105493	0.757724	-0.145172	0.884575	1	DOWN	No	No
ENSMUSG00000024673	Ms4a1	ENSMUST00000169159;ENSMUST00000185851;ENSMUST00000187379	GO:0005154(epidermal growth factor receptor binding);GO:0005515(protein binding);GO:0023026(MHC class II protein complex binding);GO:0042113(B cell activation);GO:0005615(extracellular space);GO:0005886(plasma membrane);GO:0005887(integral component of plasma membrane);GO:0009897(external side of plasma membrane);GO:0016020(membrane);GO:0016021(integral component of membrane);GO:0070062(extracell…	04640(Hematopoietic cell lineage);04640(Hematopoietic cell lineage)			membrane-spanning 4-domains, subfamily A, member 1 [Source:MGI Symbol;Acc:MGI:88321]	0.02	0.02	0	0.757724	0	1	1		No	No
ENSMUSG00000024680	Ms4a2	ENSMUST00000186978;ENSMUST00000025583	GO:0032998(Fc-epsilon receptor I complex);GO:0016021(integral component of membrane);GO:0016020(membrane);GO:0005887(integral component of plasma membrane);GO:0038095(Fc-epsilon receptor signaling pathway);GO:0006954(inflammatory response);GO:0006955(immune response);GO:0019863(IgE binding);GO:0007165(signal transduction);GO:0007166(cell surface receptor signaling pathway);GO:0009897(external sid…	04071(Sphingolipid signaling pathway);04664(Fc epsilon RI signaling pathway);05310(Asthma);05310(Asthma)			membrane-spanning 4-domains, subfamily A, member 2 [Source:MGI Symbol;Acc:MGI:95495]	0.06	0.05	-0.0136749	0.757724	-0.0131974	0.98947	1	DOWN	No	No
ENSMUSG00000024697	Gna14	ENSMUST00000025602	GO:0000166(nucleotide binding);GO:0001664(G-protein coupled receptor binding);GO:0003924(GTPase activity);GO:0004871(signal transducer activity);GO:0005525(GTP binding);GO:0019001(guanyl nucleotide binding);GO:0031683(G-protein beta/gamma-subunit complex binding);GO:0046872(metal ion binding);GO:0007165(signal transduction);GO:0007186(G-protein coupled receptor signaling pathway);GO:0007188(adeny…	04020(Calcium signaling pathway);05142(Chagas disease (American trypanosomiasis));05146(Amoebiasis)			guanine nucleotide binding protein, alpha 14 [Source:MGI Symbol;Acc:MGI:95769]	0.02	0	-0.0285692	0.757724	-0.0263948	0.978942	1	DOWN	No	No
ENSMUSG00000024727	Trpm6	ENSMUST00000040489	GO:0000166(nucleotide binding);GO:0004674(protein serine/threonine kinase activity);GO:0005216(ion channel activity);GO:0005261(cation channel activity);GO:0005262(calcium channel activity);GO:0005524(ATP binding);GO:0016301(kinase activity);GO:0016740(transferase activity);GO:0046872(metal ion binding);GO:0006468(protein phosphorylation);GO:0006810(transport);GO:0006811(ion transport);GO:0006812…	04978(Mineral absorption)	K04456	EC:2.7.11.1	transient receptor potential cation channel, subfamily M, member 6 [Source:MGI Symbol;Acc:MGI:2675603]	0.89	0.38	-0.453718	0.757724	-0.673068	0.500904	0.987608	DOWN	No	No
ENSMUSG00000024743	Syt7	ENSMUST00000073899;ENSMUST00000169121	GO:0000149(SNARE binding);GO:0001786(phosphatidylserine binding);GO:0005509(calcium ion binding);GO:0005515(protein binding);GO:0005516(calmodulin binding);GO:0005544(calcium-dependent phospholipid binding);GO:0005546(phosphatidylinositol-4,5-bisphosphate binding);GO:0019905(syntaxin binding);GO:0030276(clathrin binding);GO:0046872(metal ion binding);GO:0001778(plasma membrane repair);GO:0006887(…				synaptotagmin VII [Source:MGI Symbol;Acc:MGI:1859545]	0.09	0.08	-0.0132968	0.757724	-0.0131974	0.98947	1	DOWN	No	No
ENSMUSG00000024761	Gm16437	ENSMUST00000025669					predicted pseudogene 16437 [Source:MGI Symbol;Acc:MGI:3644508]	0	1.67	1.41684	0.757724	2.20397	0.0275266	0.0826804	UP	No	No
ENSMUSG00000024770	Lipn	ENSMUST00000025682;ENSMUST00000126710	GO:0003674(molecular_function);GO:0016787(hydrolase activity);GO:0016788(hydrolase activity, acting on ester bonds);GO:0006629(lipid metabolic process);GO:0008150(biological_process);GO:0016042(lipid catabolic process);GO:0005575(cellular_component);GO:0005576(extracellular region);GO:0005576(extracellular region)				lipase, family member N [Source:MGI Symbol;Acc:MGI:1917416]	0	0.01	0.0143553	0.757724	0.0131974	0.98947	1	UP	No	No
ENSMUSG00000024774	Ankrd22	ENSMUST00000025686	GO:0003674(molecular_function);GO:0008150(biological_process);GO:0005575(cellular_component)				ankyrin repeat domain 22 [Source:MGI Symbol;Acc:MGI:1277101]	0.09	0	-0.124328	0.757724	-0.118777	0.905452	1	DOWN	No	No
ENSMUSG00000024786	Majin	ENSMUST00000025699;ENSMUST00000113528	GO:0003674(molecular_function);GO:0003677(DNA binding);GO:0007129(synapsis);GO:0045141(meiotic telomere clustering);GO:0051321(meiotic cell cycle);GO:0070197(meiotic attachment of telomere to nuclear envelope);GO:0000781(chromosome, telomeric region);GO:0000784(nuclear chromosome, telomeric region);GO:0005634(nucleus);GO:0005637(nuclear inner membrane);GO:0005639(integral component of nuclear inn…				membrane anchored junction protein [Source:MGI Symbol;Acc:MGI:1923913]	0.04	0.04	0	0.757724	0	1	1		No	No
ENSMUSG00000024798	Htr7	ENSMUST00000164639;ENSMUST00000164781;ENSMUST00000165215;ENSMUST00000166074;ENSMUST00000099505	GO:0004871(signal transducer activity);GO:0004930(G-protein coupled receptor activity);GO:0004993(G-protein coupled serotonin receptor activity);GO:0030594(neurotransmitter receptor activity);GO:0051378(serotonin binding);GO:0006939(smooth muscle contraction);GO:0007165(signal transduction);GO:0007186(G-protein coupled receptor signaling pathway);GO:0007198(adenylate cyclase-inhibiting serotonin …	04014(Ras signaling pathway);04020(Calcium signaling pathway);04080(Neuroactive ligand-receptor interaction);04726(Serotonergic synapse);04726(Serotonergic synapse)			5-hydroxytryptamine (serotonin) receptor 7 [Source:MGI Symbol;Acc:MGI:99841]	0.36	0.53	0.169925	0.757724	0.224356	0.82248	1	UP	No	No
ENSMUSG00000024842	Cabp4	ENSMUST00000025761	GO:0005246(calcium channel regulator activity);GO:0005509(calcium ion binding);GO:0046872(metal ion binding);GO:0007165(signal transduction);GO:0007601(visual perception);GO:0007602(phototransduction);GO:0008594(photoreceptor cell morphogenesis);GO:0046549(retinal cone cell development);GO:0060040(retinal bipolar neuron differentiation);GO:0005737(cytoplasm);GO:0005829(cytosol)				calcium binding protein 4 [Source:MGI Symbol;Acc:MGI:1920910]	0.45	0.14	-0.347019	0.757724	-0.40912	0.682452	1	DOWN	No	No
ENSMUSG00000024846	Cst6	ENSMUST00000025764	GO:0004869(cysteine-type endopeptidase inhibitor activity);GO:0030414(peptidase inhibitor activity);GO:0008544(epidermis development);GO:0010466(negative regulation of peptidase activity);GO:0010951(negative regulation of endopeptidase activity);GO:0001533(cornified envelope);GO:0070062(extracellular exosome)				cystatin E/M [Source:MGI Symbol;Acc:MGI:1920970]	0.4	0.63	0.219445	0.757724	0.30354	0.761478	1	UP	No	No
ENSMUSG00000024857	Cabp2	ENSMUST00000159148	GO:0005509(calcium ion binding);GO:0005886(plasma membrane);GO:0005794(Golgi apparatus)				calcium binding protein 2 [Source:MGI Symbol;Acc:MGI:1352749]	0.03	0.05	0.027745	0.757724	0.0263948	0.978942	1	UP	No	No
ENSMUSG00000024867	Pip5k1b	ENSMUST00000025800	GO:0000166(nucleotide binding);GO:0005515(protein binding);GO:0005524(ATP binding);GO:0016301(kinase activity);GO:0016307(phosphatidylinositol phosphate kinase activity);GO:0016308(1-phosphatidylinositol-4-phosphate 5-kinase activity);GO:0016740(transferase activity);GO:0006661(phosphatidylinositol biosynthetic process);GO:0016310(phosphorylation);GO:0046488(phosphatidylinositol metabolic process…	00562(Inositol phosphate metabolism);04070(Phosphatidylinositol signaling system);04144(Endocytosis);04666(Fc gamma R-mediated phagocytosis);04810(Regulation of actin cytoskeleton);05231(Choline metabolism in cancer)			phosphatidylinositol-4-phosphate 5-kinase, type 1 beta [Source:MGI Symbol;Acc:MGI:107930]	0.01	0	-0.0143553	0.757724	-0.0131974	0.98947	1	DOWN	No	No
ENSMUSG00000024901	Peli3	ENSMUST00000120475;ENSMUST00000025834	GO:0008063(Toll signaling pathway);GO:2001237(negative regulation of extrinsic apoptotic signaling pathway);GO:0010804(negative regulation of tumor necrosis factor-mediated signaling pathway);GO:0010804(negative regulation of tumor necrosis factor-mediated signaling pathway)		K13452	EC:6.3.2.-	pellino 3 [Source:MGI Symbol;Acc:MGI:1924963]	0.03	0.02	-0.0140752	0.757724	-0.0131974	0.98947	1	DOWN	No	No
ENSMUSG00000024905	Mtl5	ENSMUST00000025840;ENSMUST00000151341;ENSMUST00000142193	GO:0003674(molecular_function);GO:0007275(multicellular organism development);GO:0007283(spermatogenesis);GO:0008150(biological_process);GO:0030154(cell differentiation);GO:0005634(nucleus);GO:0005737(cytoplasm);GO:0005737(cytoplasm)				metallothionein-like 5, testis-specific (tesmin) [Source:MGI Symbol;Acc:MGI:1340029]	0.02	0.01	-0.0142139	0.757724	-0.0131974	0.98947	1	DOWN	No	No
ENSMUSG00000024907	Gal	ENSMUST00000025842	GO:0004966(galanin receptor activity);GO:0005179(hormone activity);GO:0005184(neuropeptide hormone activity);GO:0031763(galanin receptor binding);GO:0031764(type 1 galanin receptor binding);GO:0031765(type 2 galanin receptor binding);GO:0031766(type 3 galanin receptor binding);GO:0006954(inflammatory response);GO:0007218(neuropeptide signaling pathway);GO:0007399(nervous system development);GO:00…	04080(Neuroactive ligand-receptor interaction)			galanin [Source:MGI Symbol;Acc:MGI:95637]	0.19	0.45	0.285091	0.757724	0.343133	0.731499	1	UP	No	No
ENSMUSG00000024936	Kcnk7	ENSMUST00000052448	GO:0005267(potassium channel activity);GO:0006810(transport);GO:0006811(ion transport);GO:0071805(potassium ion transmembrane transport);GO:0016020(membrane);GO:0016021(integral component of membrane)				potassium channel, subfamily K, member 7 [Source:MGI Symbol;Acc:MGI:1341841]	0	0.15	0.201634	0.757724	0.197961	0.843075	1	UP	No	No
ENSMUSG00000024957	Kcnk4	ENSMUST00000025908	GO:0005244(voltage-gated ion channel activity);GO:0005267(potassium channel activity);GO:0097604(temperature-gated cation channel activity);GO:0098782(mechanically-gated potassium channel activity);GO:0006810(transport);GO:0006811(ion transport);GO:0006813(potassium ion transport);GO:0007613(memory);GO:0019233(sensory perception of pain);GO:0034765(regulation of ion transmembrane transport);GO:00…				potassium channel, subfamily K, member 4 [Source:MGI Symbol;Acc:MGI:1298234]	0.07	0	-0.0976108	0.757724	-0.0923819	0.926395	1	DOWN	No	No
ENSMUSG00000024987	Cyp26a1	ENSMUST00000025946	GO:0055114(oxidation-reduction process);GO:0042573(retinoic acid metabolic process);GO:0034653(retinoic acid catabolic process);GO:0006805(xenobiotic metabolic process);GO:0046872(metal ion binding);GO:0020037(heme binding);GO:0016709(oxidoreductase activity, acting on paired donors, with incorporation or reduction of molecular oxygen, NAD(P)H as one donor, and incorporation of one atom of oxygen…	00830(Retinol metabolism)			cytochrome P450, family 26, subfamily a, polypeptide 1 [Source:MGI Symbol;Acc:MGI:1096359]	0.21	0.16	-0.0608822	0.757724	-0.065987	0.947388	1	DOWN	No	No
ENSMUSG00000024998	Plce1	ENSMUST00000182481;ENSMUST00000169713;ENSMUST00000182589	GO:0004435(phosphatidylinositol phospholipase C activity);GO:0004629(phospholipase C activity);GO:0004871(signal transducer activity);GO:0005085(guanyl-nucleotide exchange factor activity);GO:0005515(protein binding);GO:0008081(phosphoric diester hydrolase activity);GO:0016787(hydrolase activity);GO:0019899(enzyme binding);GO:0046872(metal ion binding);GO:0000187(activation of MAPK activity);GO:0…	00562(Inositol phosphate metabolism);04014(Ras signaling pathway);04015(Rap1 signaling pathway);04020(Calcium signaling pathway);04024(cAMP signaling pathway);04070(Phosphatidylinositol signaling system);04919(Thyroid hormone signaling pathway);05205(Proteoglycans in cancer);05205(Proteoglycans in cancer)	K05859	EC:3.1.4.11	phospholipase C, epsilon 1 [Source:MGI Symbol;Acc:MGI:1921305]	0.15	0.05	-0.131245	0.757724	-0.131974	0.895005	1	DOWN	No	No
ENSMUSG00000025002	Cyp2c55	ENSMUST00000025966	GO:0004497(monooxygenase activity);GO:0005506(iron ion binding);GO:0008392(arachidonic acid epoxygenase activity);GO:0016491(oxidoreductase activity);GO:0016705(oxidoreductase activity, acting on paired donors, with incorporation or reduction of molecular oxygen);GO:0020037(heme binding);GO:0046872(metal ion binding);GO:0070330(aromatase activity);GO:0071614(linoleic acid epoxygenase activity);GO…	00140(Steroid hormone biosynthesis);00590(Arachidonic acid metabolism);00591(Linoleic acid metabolism);00830(Retinol metabolism);04726(Serotonergic synapse);04750(Inflammatory mediator regulation of TRP channels);05204(Chemical carcinogenesis)			cytochrome P450, family 2, subfamily c, polypeptide 55 [Source:MGI Symbol;Acc:MGI:1919332]	0.14	0.16	0.025091	0.757724	0.0263948	0.978942	1	UP	No	No
ENSMUSG00000025013	Tll2	ENSMUST00000025986	GO:0004222(metalloendopeptidase activity);GO:0005509(calcium ion binding);GO:0008233(peptidase activity);GO:0008237(metallopeptidase activity);GO:0008270(zinc ion binding);GO:0016787(hydrolase activity);GO:0046872(metal ion binding);GO:0006508(proteolysis);GO:0007275(multicellular organism development);GO:0030154(cell differentiation);GO:0048632(negative regulation of skeletal muscle tissue growt…				tolloid-like 2 [Source:MGI Symbol;Acc:MGI:1346044]	0.02	0	-0.0285692	0.757724	-0.0263948	0.978942	1	DOWN	No	No
ENSMUSG00000025014	Dntt	ENSMUST00000051806	GO:0003677(DNA binding);GO:0003887(DNA-directed DNA polymerase activity);GO:0003912(DNA nucleotidylexotransferase activity);GO:0016740(transferase activity);GO:0016779(nucleotidyltransferase activity);GO:0034061(DNA polymerase activity);GO:0046872(metal ion binding);GO:0006259(DNA metabolic process);GO:0006304(DNA modification);GO:0033198(response to ATP);GO:0071897(DNA biosynthetic process);GO:0…	03450(Non-homologous end-joining);04640(Hematopoietic cell lineage)			deoxynucleotidyltransferase, terminal [Source:MGI Symbol;Acc:MGI:98659]	0	0	0	0.757724	0				No	No
ENSMUSG00000025082	Vwa2	ENSMUST00000026068	GO:0005509(calcium ion binding);GO:0042802(identical protein binding);GO:0007161(calcium-independent cell-matrix adhesion);GO:0046626(regulation of insulin receptor signaling pathway);GO:0051260(protein homooligomerization);GO:0005576(extracellular region);GO:0005604(basement membrane);GO:0005615(extracellular space);GO:0070062(extracellular exosome)				von Willebrand factor A domain containing 2 [Source:MGI Symbol;Acc:MGI:2684334]	0.1	0.08	-0.0264722	0.757724	-0.0263948	0.978942	1	DOWN	No	No
ENSMUSG00000025128	Bhlhe22	ENSMUST00000026120	GO:0022008(neurogenesis);GO:0006357(regulation of transcription from RNA polymerase II promoter);GO:0006355(regulation of transcription, DNA-templated);GO:0046983(protein dimerization activity);GO:0000981(RNA polymerase II transcription factor activity, sequence-specific DNA binding)				basic helix-loop-helix family, member e22 [Source:MGI Symbol;Acc:MGI:1930001]	0	0	0	0.757724	0				No	No
ENSMUSG00000025189	Cnnm1	ENSMUST00000165311	GO:0003674(molecular_function);GO:0006810(transport);GO:0006811(ion transport);GO:0008150(biological_process);GO:0005886(plasma membrane);GO:0016020(membrane);GO:0016021(integral component of membrane)				cyclin M1 [Source:MGI Symbol;Acc:MGI:1891366]	0.06	0.02	-0.0554951	0.757724	-0.0527896	0.9579	1	DOWN	No	No
ENSMUSG00000025195	Dnmbp	ENSMUST00000212396;ENSMUST00000212592;ENSMUST00000212048;ENSMUST00000212032;ENSMUST00000212157	GO:0005737(cytoplasm);GO:0043547(positive regulation of GTPase activity);GO:0035556(intracellular signal transduction);GO:0035023(regulation of Rho protein signal transduction);GO:0005089(Rho guanyl-nucleotide exchange factor activity);GO:0005085(guanyl-nucleotide exchange factor activity);GO:0005085(guanyl-nucleotide exchange factor activity)				dynamin binding protein [Source:MGI Symbol;Acc:MGI:1917352]	0.28	0.21	-0.0811368	0.757724	-0.0923819	0.926395	1	DOWN	No	No
ENSMUSG00000025196	Cpn1	ENSMUST00000131882	GO:0004180(carboxypeptidase activity);GO:0004181(metallocarboxypeptidase activity);GO:0008233(peptidase activity);GO:0008237(metallopeptidase activity);GO:0008270(zinc ion binding);GO:0016787(hydrolase activity);GO:0046872(metal ion binding);GO:0006508(proteolysis);GO:0010815(bradykinin catabolic process);GO:0030070(insulin processing);GO:0051384(response to glucocorticoid);GO:0005576(extracellul…				carboxypeptidase N, polypeptide 1 [Source:MGI Symbol;Acc:MGI:2135874]	0	0.04	0.0565835	0.757724	0.0527896	0.9579	1	UP	No	No
ENSMUSG00000025197	Cyp2c44	ENSMUST00000026211;ENSMUST00000211830	GO:0055114(oxidation-reduction process);GO:0019373(epoxygenase P450 pathway);GO:0046872(metal ion binding);GO:0020037(heme binding);GO:0016712(oxidoreductase activity, acting on paired donors, with incorporation or reduction of molecular oxygen, reduced flavin or flavoprotein as one donor, and incorporation of one atom of oxygen);GO:0016705(oxidoreductase activity, acting on paired donors, with i…	00140(Steroid hormone biosynthesis);00590(Arachidonic acid metabolism);00591(Linoleic acid metabolism);00830(Retinol metabolism);04726(Serotonergic synapse);04750(Inflammatory mediator regulation of TRP channels);05204(Chemical carcinogenesis);05204(Chemical carcinogenesis)	K17712	EC:1.14.14.1	cytochrome P450, family 2, subfamily c, polypeptide 44 [Source:MGI Symbol;Acc:MGI:1888897]	0.01	0.05	0.056034	0.757724	0.0527896	0.9579	1	UP	No	No
ENSMUSG00000025202	Scd3	ENSMUST00000026220	GO:0016491(oxidoreductase activity);GO:0016717(oxidoreductase activity, acting on paired donors, with oxidation of a pair of donors resulting in the reduction of molecular oxygen to two molecules of water);GO:0032896(palmitoyl-CoA 9-desaturase activity);GO:0046872(metal ion binding);GO:0006629(lipid metabolic process);GO:0006631(fatty acid metabolic process);GO:0006633(fatty acid biosynthetic pro…	01040(Biosynthesis of unsaturated fatty acids);01212(Fatty acid metabolism);03320(PPAR signaling pathway);04152(AMPK signaling pathway)			stearoyl-coenzyme A desaturase 3 [Source:MGI Symbol;Acc:MGI:1353437]	0	0.01	0.0143553	0.757724	0.0131974	0.98947	1	UP	No	No
ENSMUSG00000025207	Sema4g	ENSMUST00000026225;ENSMUST00000130549;ENSMUST00000179305	GO:0005515(protein binding);GO:0007275(multicellular organism development);GO:0007399(nervous system development);GO:0030154(cell differentiation);GO:0005886(plasma membrane);GO:0016020(membrane);GO:0016021(integral component of membrane);GO:0016021(integral component of membrane)	04360(Axon guidance);04360(Axon guidance)			sema domain, immunoglobulin domain (Ig), transmembrane domain (TM) and short cytoplasmic domain, (semaphorin) 4G [Source:MGI Symbol;Acc:MGI:1347047]	0.61	0.36	-0.243454	0.757724	-0.329935	0.741449	1	DOWN	No	No
ENSMUSG00000025215	Tlx1	ENSMUST00000026236	GO:0000978(RNA polymerase II core promoter proximal region sequence-specific DNA binding);GO:0001077(transcriptional activator activity, RNA polymerase II core promoter proximal region sequence-specific binding);GO:0003677(DNA binding);GO:0043565(sequence-specific DNA binding);GO:0006355(regulation of transcription, DNA-templated);GO:0006366(transcription from RNA polymerase II promoter);GO:00459…	05202(Transcriptional misregulation in cancers)			T cell leukemia, homeobox 1 [Source:MGI Symbol;Acc:MGI:98769]	0	0	0	0.757724	0				No	No
ENSMUSG00000025221	Kcnip2	ENSMUST00000111906	GO:0005509(calcium ion binding);GO:0005250(A-type (transient outward) potassium channel activity);GO:0015459(potassium channel regulator activity);GO:0044325(ion channel binding);GO:0047485(protein N-terminus binding);GO:0006813(potassium ion transport);GO:0045163(clustering of voltage-gated potassium channels);GO:0071435(potassium ion export);GO:0071805(potassium ion transmembrane transport);GO:…				Kv channel-interacting protein 2 [Source:MGI Symbol;Acc:MGI:2135916]	0.07	0.01	-0.0832555	0.757724	-0.0791845	0.936886	1	DOWN	No	No
ENSMUSG00000025272	Tro	ENSMUST00000112709;ENSMUST00000087258	GO:0003674(molecular_function);GO:0030308(negative regulation of cell growth);GO:0005634(nucleus);GO:0005737(cytoplasm);GO:0005737(cytoplasm)				trophinin [Source:MGI Symbol;Acc:MGI:1928994]	0.03	0.02	-0.0140752	0.757724	-0.0131974	0.98947	1	DOWN	No	No
ENSMUSG00000025321	Itgb8	ENSMUST00000026360	GO:0004872(receptor activity);GO:0005102(receptor binding);GO:1990430(extracellular matrix protein binding);GO:0001573(ganglioside metabolic process);GO:0007155(cell adhesion);GO:0007160(cell-matrix adhesion);GO:0007229(integrin-mediated signaling pathway);GO:0010628(positive regulation of gene expression);GO:0010629(negative regulation of gene expression);GO:0051216(cartilage development);GO:000…	04151(PI3K-Akt signaling pathway);04510(Focal adhesion);04512(ECM-receptor interaction);04514(Cell adhesion molecules (CAMs));04810(Regulation of actin cytoskeleton);05410(Hypertrophic cardiomyopathy (HCM));05412(Arrhythmogenic right ventricular cardiomyopathy (ARVC));05414(Dilated cardiomyopathy (DCM))			integrin beta 8 [Source:MGI Symbol;Acc:MGI:1338035]	0.02	0	-0.0285692	0.757724	-0.0263948	0.978942	1	DOWN	No	No
ENSMUSG00000025328	Padi3	ENSMUST00000026377;ENSMUST00000172098	GO:0004668(protein-arginine deiminase activity);GO:0005509(calcium ion binding);GO:0016787(hydrolase activity);GO:0042802(identical protein binding);GO:0018101(protein citrullination);GO:0036414(histone citrullination);GO:0005634(nucleus);GO:0005737(cytoplasm);GO:0005737(cytoplasm)				peptidyl arginine deiminase, type III [Source:MGI Symbol;Acc:MGI:1338891]	0.1	0.08	-0.0264722	0.757724	-0.0263948	0.978942	1	DOWN	No	No
ENSMUSG00000025329	Padi1	ENSMUST00000026378	GO:0004668(protein-arginine deiminase activity);GO:0005509(calcium ion binding);GO:0018101(protein citrullination);GO:0005654(nucleoplasm);GO:0005737(cytoplasm);GO:0005829(cytosol);GO:0070062(extracellular exosome);GO:0016787(hydrolase activity);GO:0036414(histone citrullination);GO:0005634(nucleus)				peptidyl arginine deiminase, type I [Source:MGI Symbol;Acc:MGI:1338893]	0.13	0.32	0.224215	0.757724	0.250751	0.802007	1	UP	No	No
ENSMUSG00000025333	Gpr143	ENSMUST00000026383	GO:0004871(signal transducer activity);GO:0004930(G-protein coupled receptor activity);GO:0035240(dopamine binding);GO:0035643(L-DOPA receptor activity);GO:0072544(L-DOPA binding);GO:0072545(tyrosine binding);GO:0007165(signal transduction);GO:0007186(G-protein coupled receptor signaling pathway);GO:0007218(neuropeptide signaling pathway);GO:0032400(melanosome localization);GO:0032402(melanosome …				G protein-coupled receptor 143 [Source:MGI Symbol;Acc:MGI:107193]	0.03	0.02	-0.0140752	0.757724	-0.0131974	0.98947	1	DOWN	No	No
ENSMUSG00000025375	Aatk	ENSMUST00000142959;ENSMUST00000064307;ENSMUST00000150730;ENSMUST00000103019;ENSMUST00000103020;ENSMUST00000128836;ENSMUST00000134319	GO:0016310(phosphorylation);GO:0006468(protein phosphorylation);GO:0016301(kinase activity);GO:0005524(ATP binding);GO:0004672(protein kinase activity);GO:0004672(protein kinase activity)				apoptosis-associated tyrosine kinase [Source:MGI Symbol;Acc:MGI:1197518]	0.45	0.3	-0.157541	0.757724	-0.197961	0.843075	1	DOWN	No	No
ENSMUSG00000025380	Fscn2	ENSMUST00000026445;ENSMUST00000130476	GO:0003779(actin binding);GO:0030674(protein binding, bridging);GO:0032403(protein complex binding);GO:0051015(actin filament binding);GO:0007015(actin filament organization);GO:0007163(establishment or maintenance of cell polarity);GO:0016477(cell migration);GO:0030036(actin cytoskeleton organization);GO:0042462(eye photoreceptor cell development);GO:0051017(actin filament bundle assembly);GO:00…				fascin actin-bundling protein 2 [Source:MGI Symbol;Acc:MGI:2443337]	0.11	0.03	-0.107915	0.757724	-0.105579	0.915916	1	DOWN	No	No
ENSMUSG00000025386	Pde6g	ENSMUST00000141795;ENSMUST00000155421;ENSMUST00000026452	GO:0004114(3',5'-cyclic-nucleotide phosphodiesterase activity);GO:0005515(protein binding);GO:0016787(hydrolase activity);GO:0030507(spectrin binding);GO:0030553(cGMP binding);GO:0047555(3',5'-cyclic-GMP phosphodiesterase activity);GO:0000187(activation of MAPK activity);GO:0007223(Wnt signaling pathway, calcium modulating pathway);GO:0007601(visual perception);GO:0045742(positive regulation of e…	00230(Purine metabolism);04744(Phototransduction);04744(Phototransduction)			phosphodiesterase 6G, cGMP-specific, rod, gamma [Source:MGI Symbol;Acc:MGI:97526]	0.08	0.12	0.0524674	0.757724	0.0527896	0.9579	1	UP	No	No
ENSMUSG00000025401	Myo1a	ENSMUST00000079590;ENSMUST00000219882	GO:0000166(nucleotide binding);GO:0003774(motor activity);GO:0003779(actin binding);GO:0005516(calmodulin binding);GO:0005524(ATP binding);GO:0051015(actin filament binding);GO:0007605(sensory perception of sound);GO:0030030(cell projection organization);GO:0030033(microvillus assembly);GO:0051648(vesicle localization);GO:0005737(cytoplasm);GO:0005902(microvillus);GO:0005903(brush border);GO:0009…				myosin IA [Source:MGI Symbol;Acc:MGI:107732]	0.42	0.35	-0.0729315	0.757724	-0.0923819	0.926395	1	DOWN	No	No
ENSMUSG00000025420	Katnal2	ENSMUST00000126153;ENSMUST00000135029;ENSMUST00000122984;ENSMUST00000137498;ENSMUST00000125744;ENSMUST00000138336;ENSMUST00000154665	GO:0000166(nucleotide binding);GO:0005524(ATP binding);GO:0008568(microtubule-severing ATPase activity);GO:0016787(hydrolase activity);GO:0031122(cytoplasmic microtubule organization);GO:0005634(nucleus);GO:0005737(cytoplasm);GO:0005856(cytoskeleton);GO:0005874(microtubule);GO:0051013(microtubule severing);GO:0008017(microtubule binding);GO:0008017(microtubule binding)				katanin p60 subunit A-like 2 [Source:MGI Symbol;Acc:MGI:1924234]	0.91	0.95	0.0299015	0.757724	0.0527896	0.9579	1	UP	No	No
ENSMUSG00000025422	Agap2	ENSMUST00000218292;ENSMUST00000039259;ENSMUST00000217941	GO:0000166(nucleotide binding);GO:0003924(GTPase activity);GO:0005096(GTPase activator activity);GO:0005515(protein binding);GO:0005524(ATP binding);GO:0005525(GTP binding);GO:0019901(protein kinase binding);GO:0030295(protein kinase activator activity);GO:0035014(phosphatidylinositol 3-kinase regulator activity);GO:0046872(metal ion binding);GO:0007264(small GTPase mediated signal transduction);…	04068(FoxO signaling pathway);04144(Endocytosis);04144(Endocytosis)			ArfGAP with GTPase domain, ankyrin repeat and PH domain 2 [Source:MGI Symbol;Acc:MGI:3580016]	0.47	0.48	0.00978102	0.757724	0.0131974	0.98947	1	UP	No	No
ENSMUSG00000025427	Rnf165	ENSMUST00000026494	GO:0043234(protein complex);GO:0005737(cytoplasm);GO:0005634(nucleus);GO:0061061(muscle structure development);GO:0060384(innervation);GO:0060173(limb development);GO:0043161(proteasome-mediated ubiquitin-dependent protein catabolic process);GO:0042787(protein ubiquitination involved in ubiquitin-dependent protein catabolic process);GO:0035136(forelimb morphogenesis);GO:0030513(positive regulatio…		K13452	EC:6.3.2.-	ring finger protein 165 [Source:MGI Symbol;Acc:MGI:2444521]	0	0	0	0.757724	0				No	No
ENSMUSG00000025461	Cd163l1	ENSMUST00000211540;ENSMUST00000084460;ENSMUST00000209637	GO:0016021(integral component of membrane);GO:0016020(membrane);GO:0005886(plasma membrane);GO:0008150(biological_process);GO:0006898(receptor-mediated endocytosis);GO:0005044(scavenger receptor activity);GO:0003674(molecular_function);GO:0003674(molecular_function)				CD163 molecule-like 1 [Source:MGI Symbol;Acc:MGI:2443796]	0	0.03	0.0426443	0.757724	0.0395922	0.968418	1	UP	No	No
ENSMUSG00000025469	Msx3	ENSMUST00000055353;ENSMUST00000172775	GO:0003677(DNA binding);GO:0005634(nucleus);GO:0006355(regulation of transcription, DNA-templated);GO:0043565(sequence-specific DNA binding);GO:0005515(protein binding);GO:0000122(negative regulation of transcription from RNA polymerase II promoter);GO:0006351(transcription, DNA-templated);GO:0006357(regulation of transcription from RNA polymerase II promoter);GO:0007275(multicellular organism de…	05166(HTLV-I infection);05166(HTLV-I infection)			msh homeobox 3 [Source:MGI Symbol;Acc:MGI:106587]	0.15	0.14	-0.0126	0.757724	-0.0131974	0.98947	1	DOWN	No	No
ENSMUSG00000025475	Adgra1	ENSMUST00000026548	GO:0003674(molecular_function);GO:0004888(transmembrane signaling receptor activity);GO:0004930(G-protein coupled receptor activity);GO:0007166(cell surface receptor signaling pathway);GO:0007186(G-protein coupled receptor signaling pathway);GO:0008150(biological_process);GO:0016020(membrane);GO:0016021(integral component of membrane)				adhesion G protein-coupled receptor A1 [Source:MGI Symbol;Acc:MGI:1277167]	0.49	0.54	0.047618	0.757724	0.065987	0.947388	1	UP	No	No
ENSMUSG00000025480	Syce1	ENSMUST00000026553	GO:0005515(protein binding);GO:0007049(cell cycle);GO:0007130(synaptonemal complex assembly);GO:0051301(cell division);GO:0051321(meiotic cell cycle);GO:0070193(synaptonemal complex organization);GO:0000795(synaptonemal complex);GO:0000801(central element);GO:0005634(nucleus);GO:0005654(nucleoplasm);GO:0005694(chromosome)				synaptonemal complex central element protein 1 [Source:MGI Symbol;Acc:MGI:1921325]	0	0.03	0.0426443	0.757724	0.0395922	0.968418	1	UP	No	No
ENSMUSG00000025496	Drd4	ENSMUST00000026569;ENSMUST00000209649	GO:0001591(dopamine neurotransmitter receptor activity, coupled via Gi/Go);GO:0004871(signal transducer activity);GO:0004930(G-protein coupled receptor activity);GO:0004952(dopamine neurotransmitter receptor activity);GO:0008144(drug binding);GO:0017124(SH3 domain binding);GO:0035240(dopamine binding);GO:0042802(identical protein binding);GO:0000187(activation of MAPK activity);GO:0001975(respons…	04080(Neuroactive ligand-receptor interaction);04728(Dopaminergic synapse);04728(Dopaminergic synapse)			dopamine receptor D4 [Source:MGI Symbol;Acc:MGI:94926]	0.01	0.01	0	0.757724	0	1	1		No	No
ENSMUSG00000025497	Cdhr5	ENSMUST00000080654;ENSMUST00000167263;ENSMUST00000210773;ENSMUST00000210124;ENSMUST00000210386	GO:0005509(calcium ion binding);GO:0008013(beta-catenin binding);GO:0050839(cell adhesion molecule binding);GO:0007155(cell adhesion);GO:0007156(homophilic cell adhesion via plasma membrane adhesion molecules);GO:0030154(cell differentiation);GO:0032532(regulation of microvillus length);GO:0090675(intermicrovillar adhesion);GO:0005886(plasma membrane);GO:0016020(membrane);GO:0016021(integral comp…				cadherin-related family member 5 [Source:MGI Symbol;Acc:MGI:1919290]	1.27	0.75	-0.375337	0.757724	-0.686265	0.492546	0.976098	DOWN	No	No
ENSMUSG00000025515	Muc2	ENSMUST00000187945	GO:0070701(mucus layer);GO:0005576(extracellular region)				mucin 2 [Source:MGI Symbol;Acc:MGI:1339364]	0.04	0.01	-0.0422282	0.757724	-0.0395922	0.968418	1	DOWN	No	No
ENSMUSG00000025529	Zfp711	ENSMUST00000113409	GO:0005634(nucleus);GO:0006355(regulation of transcription, DNA-templated);GO:0046872(metal ion binding);GO:0003677(DNA binding);GO:0003676(nucleic acid binding);GO:0070062(extracellular exosome);GO:0045893(positive regulation of transcription, DNA-templated);GO:0043565(sequence-specific DNA binding)				zinc finger protein 711 [Source:MGI Symbol;Acc:MGI:3045342]	0.04	0	-0.0565835	0.757724	-0.0527896	0.9579	1	DOWN	No	No
ENSMUSG00000025573	6030468B19Rik	ENSMUST00000106331	GO:0003674(molecular_function);GO:0008150(biological_process);GO:0005575(cellular_component);GO:0005576(extracellular region)				RIKEN cDNA 6030468B19 gene [Source:MGI Symbol;Acc:MGI:1924977]	0.05	0.09	0.0539388	0.757724	0.0527896	0.9579	1	UP	No	No
ENSMUSG00000025576	Rbfox3	ENSMUST00000017576	GO:0000166(nucleotide binding);GO:0003676(nucleic acid binding);GO:0003677(DNA binding);GO:0003723(RNA binding);GO:0003729(mRNA binding);GO:0005515(protein binding);GO:0000381(regulation of alternative mRNA splicing, via spliceosome);GO:0006397(mRNA processing);GO:0007399(nervous system development);GO:0008380(RNA splicing);GO:0043484(regulation of RNA splicing);GO:0005622(intracellular);GO:00056…				RNA binding protein, fox-1 homolog (C. elegans) 3 [Source:MGI Symbol;Acc:MGI:106368]	0	0	0	0.757724	0				No	No
ENSMUSG00000025588	Nat1	ENSMUST00000026677	GO:0008152(metabolic process);GO:0016746(transferase activity, transferring acyl groups);GO:0016740(transferase activity);GO:0016407(acetyltransferase activity);GO:0004060(arylamine N-acetyltransferase activity);GO:0001889(liver development);GO:0007568(aging);GO:0097068(response to thyroxine);GO:0005737(cytoplasm);GO:0005829(cytosol)	00232(Caffeine metabolism);00983(Drug metabolism - other enzymes);05204(Chemical carcinogenesis)	K00622	EC:2.3.1.5	N-acetyl transferase 1 [Source:MGI Symbol;Acc:MGI:97279]	0	0	0	0.757724	0				No	No
ENSMUSG00000025652	Tmem89	ENSMUST00000192852	GO:0003674(molecular_function);GO:0008150(biological_process);GO:0005634(nucleus);GO:0016020(membrane);GO:0016021(integral component of membrane)				transmembrane protein 89 [Source:MGI Symbol;Acc:MGI:1916634]	0.06	0	-0.0840643	0.757724	-0.0791845	0.936886	1	DOWN	No	No
ENSMUSG00000025656	Arhgef9	ENSMUST00000113876;ENSMUST00000113883;ENSMUST00000181987;ENSMUST00000128565;ENSMUST00000182135	GO:0005085(guanyl-nucleotide exchange factor activity);GO:0005089(Rho guanyl-nucleotide exchange factor activity);GO:0007264(small GTPase mediated signal transduction);GO:0035023(regulation of Rho protein signal transduction);GO:0043547(positive regulation of GTPase activity);GO:0005737(cytoplasm);GO:0005829(cytosol);GO:0005938(cell cortex);GO:0005938(cell cortex)				CDC42 guanine nucleotide exchange factor (GEF) 9 [Source:MGI Symbol;Acc:MGI:2442233]	0.02	0.01	-0.0142139	0.757724	-0.0131974	0.98947	1	DOWN	No	No
ENSMUSG00000025777	Gdap1	ENSMUST00000026879	GO:0000266(mitochondrial fission);GO:0006626(protein targeting to mitochondrion);GO:0008053(mitochondrial fusion);GO:0032526(response to retinoic acid);GO:0071305(cellular response to vitamin D);GO:0005634(nucleus);GO:0005737(cytoplasm);GO:0005739(mitochondrion);GO:0005741(mitochondrial outer membrane);GO:0005829(cytosol);GO:0016020(membrane);GO:0016021(integral component of membrane);GO:0031307(…				ganglioside-induced differentiation-associated-protein 1 [Source:MGI Symbol;Acc:MGI:1338002]	0.06	0.02	-0.0554951	0.757724	-0.0527896	0.9579	1	DOWN	No	No
ENSMUSG00000025789	St8sia2	ENSMUST00000026896	GO:0003828(alpha-N-acetylneuraminate alpha-2,8-sialyltransferase activity);GO:0008373(sialyltransferase activity);GO:0016740(transferase activity);GO:0016757(transferase activity, transferring glycosyl groups);GO:0001574(ganglioside biosynthetic process);GO:0006486(protein glycosylation);GO:0006491(N-glycan processing);GO:0009311(oligosaccharide metabolic process);GO:0097503(sialylation);GO:00001…				ST8 alpha-N-acetyl-neuraminide alpha-2,8-sialyltransferase 2 [Source:MGI Symbol;Acc:MGI:106020]	0	0	0	0.757724	0				No	No
ENSMUSG00000025813	Homer2	ENSMUST00000098326;ENSMUST00000207983;ENSMUST00000026922;ENSMUST00000207371;ENSMUST00000207289	GO:0003779(actin binding);GO:0005515(protein binding);GO:0019904(protein domain specific binding);GO:0030160(GKAP/Homer scaffold activity);GO:0035254(glutamate receptor binding);GO:0035256(G-protein coupled glutamate receptor binding);GO:0042803(protein homodimerization activity);GO:0046982(protein heterodimerization activity);GO:0007216(G-protein coupled glutamate receptor signaling pathway);GO:…	04068(FoxO signaling pathway);04724(Glutamatergic synapse);04724(Glutamatergic synapse)			homer scaffolding protein 2 [Source:MGI Symbol;Acc:MGI:1347354]	0.01	0	-0.0143553	0.757724	-0.0131974	0.98947	1	DOWN	No	No
ENSMUSG00000025867	Cplx2	ENSMUST00000026985	GO:0000149(SNARE binding);GO:0017075(syntaxin-1 binding);GO:0019905(syntaxin binding);GO:0048306(calcium-dependent protein binding);GO:0006810(transport);GO:0006836(neurotransmitter transport);GO:0006887(exocytosis);GO:0007399(nervous system development);GO:0016079(synaptic vesicle exocytosis);GO:0030154(cell differentiation);GO:0031915(positive regulation of synaptic plasticity);GO:0043303(mast …	04721(Synaptic vesicle cycle)			complexin 2 [Source:MGI Symbol;Acc:MGI:104726]	0.03	0.11	0.107915	0.757724	0.105579	0.915916	1	UP	No	No
ENSMUSG00000025885	Myo5b	ENSMUST00000074157;ENSMUST00000120161;ENSMUST00000154986	GO:0016459(myosin complex);GO:0005524(ATP binding);GO:0003774(motor activity);GO:0070062(extracellular exosome);GO:0045179(apical cortex);GO:0043234(protein complex);GO:0032439(endosome localization);GO:0016192(vesicle-mediated transport);GO:0008152(metabolic process);GO:0017137(Rab GTPase binding);GO:0003824(catalytic activity);GO:0003779(actin binding);GO:0000166(nucleotide binding);GO:0000166(…				myosin VB [Source:MGI Symbol;Acc:MGI:106598]	0.03	0.04	0.0139392	0.757724	0.0131974	0.98947	1	UP	No	No
ENSMUSG00000025916	Ppp1r42	ENSMUST00000124874;ENSMUST00000027049	GO:0003779(actin binding);GO:0005515(protein binding);GO:0015631(tubulin binding);GO:0070840(dynein complex binding);GO:0010921(regulation of phosphatase activity);GO:0002177(manchette);GO:0005737(cytoplasm);GO:0005813(centrosome);GO:0005815(microtubule organizing center);GO:0005856(cytoskeleton);GO:0015630(microtubule cytoskeleton);GO:0015630(microtubule cytoskeleton)				protein phosphatase 1, regulatory subunit 42 [Source:MGI Symbol;Acc:MGI:1921138]	0.04	0.03	-0.0139392	0.757724	-0.0131974	0.98947	1	DOWN	No	No
ENSMUSG00000025930	Msc	ENSMUST00000027062;ENSMUST00000190471	GO:0000980(RNA polymerase II distal enhancer sequence-specific DNA binding);GO:0001206(transcriptional repressor activity, RNA polymerase II distal enhancer sequence-specific binding);GO:0003677(DNA binding);GO:0046983(protein dimerization activity);GO:0000122(negative regulation of transcription from RNA polymerase II promoter);GO:0006351(transcription, DNA-templated);GO:0006355(regulation of tr…				musculin [Source:MGI Symbol;Acc:MGI:1333884]	0	0.04	0.0565835	0.757724	0.0527896	0.9579	1	UP	No	No
ENSMUSG00000025932	Eya1	ENSMUST00000027066;ENSMUST00000168081;ENSMUST00000080664;ENSMUST00000190337;ENSMUST00000188857;ENSMUST00000185453	GO:0042471(ear morphogenesis);GO:0035335(peptidyl-tyrosine dephosphorylation);GO:0009887(animal organ morphogenesis);GO:0007275(multicellular organism development);GO:0006355(regulation of transcription, DNA-templated);GO:0046872(metal ion binding);GO:0016787(hydrolase activity);GO:0004725(protein tyrosine phosphatase activity);GO:0004721(phosphoprotein phosphatase activity);GO:0003723(RNA bindin…	05202(Transcriptional misregulation in cancers);05202(Transcriptional misregulation in cancers)			EYA transcriptional coactivator and phosphatase 1 [Source:MGI Symbol;Acc:MGI:109344]	1.04	0.85	-0.141044	0.757724	-0.250751	0.802007	1	DOWN	No	No
ENSMUSG00000025933	Tmem14a	ENSMUST00000027065;ENSMUST00000027064	GO:0003674(molecular_function);GO:0008150(biological_process);GO:0005575(cellular_component);GO:0016020(membrane);GO:0016021(integral component of membrane);GO:0016021(integral component of membrane)				transmembrane protein 14A [Source:MGI Symbol;Acc:MGI:1922962]	0.53	0.4	-0.128105	0.757724	-0.171566	0.863778	1	DOWN	No	No
ENSMUSG00000025936	Gm4956	ENSMUST00000082032;ENSMUST00000178869					predicted gene 4956 [Source:MGI Symbol;Acc:MGI:3647976]	0.26	0	-0.333424	0.757724	-0.343133	0.731499	1	DOWN	No	No
ENSMUSG00000025946	Pth2r	ENSMUST00000140190;ENSMUST00000027083	GO:0016021(integral component of membrane);GO:0016020(membrane);GO:0007186(G-protein coupled receptor signaling pathway);GO:0004930(G-protein coupled receptor activity);GO:0004871(signal transducer activity);GO:0004888(transmembrane signaling receptor activity);GO:0007165(signal transduction);GO:0007166(cell surface receptor signaling pathway);GO:0005886(plasma membrane);GO:0005886(plasma membran…	04080(Neuroactive ligand-receptor interaction);04080(Neuroactive ligand-receptor interaction)			parathyroid hormone 2 receptor [Source:MGI Symbol;Acc:MGI:2180917]	0.01	0	-0.0143553	0.757724	-0.0131974	0.98947	1	DOWN	No	No
ENSMUSG00000025955	Akr1cl	ENSMUST00000069142;ENSMUST00000159896	GO:0005575(cellular_component);GO:0055114(oxidation-reduction process);GO:0008150(biological_process);GO:0016491(oxidoreductase activity);GO:0003674(molecular_function);GO:0003674(molecular_function)				aldo-keto reductase family 1, member C-like [Source:MGI Symbol;Acc:MGI:1918111]	0.03	0	-0.0426443	0.757724	-0.0395922	0.968418	1	DOWN	No	No
ENSMUSG00000025961	4933402D24Rik	ENSMUST00000027102	GO:0003674(molecular_function);GO:0008150(biological_process);GO:0005575(cellular_component)				RIKEN cDNA 4933402D24 gene [Source:MGI Symbol;Acc:MGI:1921676]	0.1	0.05	-0.0671142	0.757724	-0.065987	0.947388	1	DOWN	No	No
ENSMUSG00000025963	Mdh1b	ENSMUST00000114094	GO:0003824(catalytic activity);GO:0016491(oxidoreductase activity);GO:0016615(malate dehydrogenase activity);GO:0016616(oxidoreductase activity, acting on the CH-OH group of donors, NAD or NADP as acceptor);GO:0030060(L-malate dehydrogenase activity);GO:0005975(carbohydrate metabolic process);GO:0006099(tricarboxylic acid cycle);GO:0006107(oxaloacetate metabolic process);GO:0006108(malate metabol…		K00025	EC:1.1.1.37	malate dehydrogenase 1B, NAD (soluble) [Source:MGI Symbol;Acc:MGI:1923918]	0.07	0	-0.0976108	0.757724	-0.0923819	0.926395	1	DOWN	No	No
ENSMUSG00000025978	Rftn2	ENSMUST00000027121;ENSMUST00000132055;ENSMUST00000114428;ENSMUST00000133294;ENSMUST00000141107	GO:0003674(molecular_function);GO:0032596(protein transport into membrane raft);GO:0033227(dsRNA transport);GO:0043330(response to exogenous dsRNA);GO:0050851(antigen receptor-mediated signaling pathway);GO:0005737(cytoplasm);GO:0005886(plasma membrane);GO:0016020(membrane);GO:0045121(membrane raft);GO:0045121(membrane raft)				raftlin family member 2 [Source:MGI Symbol;Acc:MGI:1921263]	0.39	0.23	-0.176427	0.757724	-0.211159	0.832764	1	DOWN	No	No
ENSMUSG00000025983	Ccdc150	ENSMUST00000161988;ENSMUST00000027128;ENSMUST00000160472;ENSMUST00000163072;ENSMUST00000159682	GO:0003674(molecular_function);GO:0008150(biological_process);GO:0005575(cellular_component);GO:0005575(cellular_component)				coiled-coil domain containing 150 [Source:MGI Symbol;Acc:MGI:1925266]	0.11	0.05	-0.0801703	0.757724	-0.0791845	0.936886	1	DOWN	No	No
ENSMUSG00000025997	Ikzf2	ENSMUST00000027146	GO:0003676(nucleic acid binding);GO:0003677(DNA binding);GO:0003700(transcription factor activity, sequence-specific DNA binding);GO:0042803(protein homodimerization activity);GO:0044212(transcription regulatory region DNA binding);GO:0046872(metal ion binding);GO:0046982(protein heterodimerization activity);GO:0000122(negative regulation of transcription from RNA polymerase II promoter);GO:00063…				IKAROS family zinc finger 2 [Source:MGI Symbol;Acc:MGI:1342541]	0.11	0.08	-0.0395284	0.757724	-0.0395922	0.968418	1	DOWN	No	No
ENSMUSG00000026009	Icos	ENSMUST00000027162;ENSMUST00000102827	GO:0016020(membrane);GO:0016021(integral component of membrane);GO:0002517(T cell tolerance induction);GO:0016337(single organismal cell-cell adhesion);GO:0031295(T cell costimulation);GO:0005515(protein binding);GO:0005887(integral component of plasma membrane);GO:0009897(external side of plasma membrane);GO:0009897(external side of plasma membrane)	04514(Cell adhesion molecules (CAMs));04660(T cell receptor signaling pathway);04672(Intestinal immune network for IgA production);05340(Primary immunodeficiency);05340(Primary immunodeficiency)			inducible T cell co-stimulator [Source:MGI Symbol;Acc:MGI:1858745]	0.52	0.64	0.109624	0.757724	0.158369	0.874166	1	UP	No	No
ENSMUSG00000026011	Ctla4	ENSMUST00000124816;ENSMUST00000027164;ENSMUST00000097720	GO:0006955(immune response);GO:0006974(cellular response to DNA damage stimulus);GO:0030889(negative regulation of B cell proliferation);GO:0042130(negative regulation of T cell proliferation);GO:0043065(positive regulation of apoptotic process);GO:0045590(negative regulation of regulatory T cell differentiation);GO:0050777(negative regulation of immune response);GO:0050853(B cell receptor signal…	04514(Cell adhesion molecules (CAMs));04660(T cell receptor signaling pathway);05320(Autoimmune thyroid disease);05323(Rheumatoid arthritis);05323(Rheumatoid arthritis)			cytotoxic T-lymphocyte-associated protein 4 [Source:MGI Symbol;Acc:MGI:88556]	0.51	0.9	0.331451	0.757724	0.514699	0.606763	1	UP	No	No
ENSMUSG00000026012	Cd28	ENSMUST00000132833;ENSMUST00000027165;ENSMUST00000153207	GO:0002020(protease binding);GO:0005070(SH3/SH2 adaptor activity);GO:0019901(protein kinase binding);GO:0002863(positive regulation of inflammatory response to antigenic stimulus);GO:0006955(immune response);GO:0010628(positive regulation of gene expression);GO:0010629(negative regulation of gene expression);GO:0014068(positive regulation of phosphatidylinositol 3-kinase signaling);GO:0031295(T c…	04514(Cell adhesion molecules (CAMs));04660(T cell receptor signaling pathway);04672(Intestinal immune network for IgA production);04940(Type I diabetes mellitus);05162(Measles);05320(Autoimmune thyroid disease);05322(Systemic lupus erythematosus);05323(Rheumatoid arthritis);05330(Allograft rejection);05332(Graft-versus-host disease);05416(Viral myocarditis);05416(Viral myocarditis)			CD28 antigen [Source:MGI Symbol;Acc:MGI:88327]	0.37	0.36	-0.0105692	0.757724	-0.0131974	0.98947	1	DOWN	No	No
ENSMUSG00000026051	1500015O10Rik	ENSMUST00000027217	GO:0003674(molecular_function);GO:0031145(anaphase-promoting complex-dependent catabolic process);GO:0070314(G1 to G0 transition);GO:0090398(cellular senescence);GO:0005576(extracellular region);GO:0005615(extracellular space);GO:0030133(transport vesicle);GO:0031410(cytoplasmic vesicle)				RIKEN cDNA 1500015O10 gene [Source:MGI Symbol;Acc:MGI:1926146]	0.08	0.52	0.49304	0.757724	0.580686	0.561452	1	UP	No	No
ENSMUSG00000026062	Slc9a2	ENSMUST00000027231;ENSMUST00000192345	GO:0015297(antiporter activity);GO:0015299(solute:proton antiporter activity);GO:0015385(sodium:proton antiporter activity);GO:0015386(potassium:proton antiporter activity);GO:0006810(transport);GO:0006811(ion transport);GO:0006812(cation transport);GO:0006814(sodium ion transport);GO:0006885(regulation of pH);GO:0008104(protein localization);GO:0051453(regulation of intracellular pH);GO:0055085(…				solute carrier family 9 (sodium/hydrogen exchanger), member 2 [Source:MGI Symbol;Acc:MGI:105075]	0.17	0.26	0.106915	0.757724	0.118777	0.905452	1	UP	No	No
ENSMUSG00000026065	Slc9a4	ENSMUST00000027233;ENSMUST00000192454	GO:0015297(antiporter activity);GO:0015299(solute:proton antiporter activity);GO:0015385(sodium:proton antiporter activity);GO:0015386(potassium:proton antiporter activity);GO:0001696(gastric acid secretion);GO:0002064(epithelial cell development);GO:0006810(transport);GO:0006811(ion transport);GO:0006812(cation transport);GO:0006814(sodium ion transport);GO:0006885(regulation of pH);GO:0051453(r…	04971(Gastric acid secretion);04971(Gastric acid secretion)			solute carrier family 9 (sodium/hydrogen exchanger), member 4 [Source:MGI Symbol;Acc:MGI:105074]	0.05	0.03	-0.027745	0.757724	-0.0263948	0.978942	1	DOWN	No	No
ENSMUSG00000026114	Cnga3	ENSMUST00000027288	GO:1902495(transmembrane transporter complex);GO:0043204(perikaryon);GO:0043025(neuronal cell body);GO:0042622(photoreceptor outer segment membrane);GO:0030425(dendrite);GO:0016021(integral component of membrane);GO:0016020(membrane);GO:0005737(cytoplasm);GO:0098655(cation transmembrane transport);GO:0055085(transmembrane transport);GO:0051591(response to cAMP);GO:0034220(ion transmembrane transp…	04024(cAMP signaling pathway);04740(Olfactory transduction)			cyclic nucleotide gated channel alpha 3 [Source:MGI Symbol;Acc:MGI:1341818]	0.01	0.04	0.0422282	0.757724	0.0395922	0.968418	1	UP	No	No
ENSMUSG00000026117	Zap70	ENSMUST00000027291;ENSMUST00000186624;ENSMUST00000190128	GO:0045121(membrane raft);GO:0000166(nucleotide binding);GO:0004672(protein kinase activity);GO:0004713(protein tyrosine kinase activity);GO:0004715(non-membrane spanning protein tyrosine kinase activity);GO:0005102(receptor binding);GO:0005515(protein binding);GO:0005524(ATP binding);GO:0016301(kinase activity);GO:0016740(transferase activity);GO:0002250(adaptive immune response);GO:0002376(immu…	04014(Ras signaling pathway);04064(NF-kappa B signaling pathway);04650(Natural killer cell mediated cytotoxicity);04660(T cell receptor signaling pathway);05340(Primary immunodeficiency);05340(Primary immunodeficiency)			zeta-chain (TCR) associated protein kinase [Source:MGI Symbol;Acc:MGI:99613]	0.76	1.26	0.360747	0.757724	0.65987	0.509337	0.998355	UP	No	No
ENSMUSG00000026147	Col9a1	ENSMUST00000054588	GO:0005594(collagen type IX trimer);GO:0005581(collagen trimer)	04974(Protein digestion and absorption)			collagen, type IX, alpha 1 [Source:MGI Symbol;Acc:MGI:88465]	0.03	0.01	-0.028289	0.757724	-0.0263948	0.978942	1	DOWN	No	No
ENSMUSG00000026166	Ccl20	ENSMUST00000027351;ENSMUST00000113437	GO:0005615(extracellular space);GO:0005576(extracellular region);GO:0060326(cell chemotaxis);GO:0006955(immune response);GO:0006935(chemotaxis);GO:0008009(chemokine activity);GO:0005125(cytokine activity);GO:0005515(protein binding);GO:0031731(CCR6 chemokine receptor binding);GO:0002548(monocyte chemotaxis);GO:0006954(inflammatory response);GO:0007186(G-protein coupled receptor signaling pathway)…	04060(Cytokine-cytokine receptor interaction);04062(Chemokine signaling pathway);04668(TNF signaling pathway);05323(Rheumatoid arthritis);05323(Rheumatoid arthritis)			chemokine (C-C motif) ligand 20 [Source:MGI Symbol;Acc:MGI:1329031]	0	0.03	0.0426443	0.757724	0.0395922	0.968418	1	UP	No	No
ENSMUSG00000026205	Slc23a3	ENSMUST00000027405;ENSMUST00000188080	GO:0016021(integral component of membrane);GO:0016020(membrane);GO:0055085(transmembrane transport);GO:0006810(transport);GO:0005215(transporter activity);GO:0005215(transporter activity)				solute carrier family 23 (nucleobase transporters), member 3 [Source:MGI Symbol;Acc:MGI:104516]	0.13	0.06	-0.0922585	0.757724	-0.0923819	0.926395	1	DOWN	No	No
ENSMUSG00000026224	4933407L21Rik	ENSMUST00000027426;ENSMUST00000188949	GO:0003674(molecular_function);GO:0008150(biological_process);GO:0005575(cellular_component);GO:0005575(cellular_component)				RIKEN cDNA 4933407L21 gene [Source:MGI Symbol;Acc:MGI:1918391]	0	0	0	0.757724	0				No	No
ENSMUSG00000026235	Epha4	ENSMUST00000027451	GO:0000166(nucleotide binding);GO:0004672(protein kinase activity);GO:0004713(protein tyrosine kinase activity);GO:0004714(transmembrane receptor protein tyrosine kinase activity);GO:0005003(ephrin receptor activity);GO:0005004(GPI-linked ephrin receptor activity);GO:0005005(transmembrane-ephrin receptor activity);GO:0005515(protein binding);GO:0005524(ATP binding);GO:0016301(kinase activity);GO:…	04360(Axon guidance)			Eph receptor A4 [Source:MGI Symbol;Acc:MGI:98277]	0.02	0.01	-0.0142139	0.757724	-0.0131974	0.98947	1	DOWN	No	No
ENSMUSG00000026241	Nppc	ENSMUST00000027449	GO:0005102(receptor binding);GO:0005179(hormone activity);GO:0042803(protein homodimerization activity);GO:0051428(peptide hormone receptor binding);GO:0001666(response to hypoxia);GO:0006182(cGMP biosynthetic process);GO:0007168(receptor guanylyl cyclase signaling pathway);GO:0008285(negative regulation of cell proliferation);GO:0030814(regulation of cAMP metabolic process);GO:0030823(regulation…	04270(Vascular smooth muscle contraction)			natriuretic peptide type C [Source:MGI Symbol;Acc:MGI:97369]	0.18	0.04	-0.182203	0.757724	-0.184764	0.853414	1	DOWN	No	No
ENSMUSG00000026251	Chrnd	ENSMUST00000189970;ENSMUST00000186373	GO:0022848(acetylcholine-gated cation-selective channel activity);GO:0042166(acetylcholine binding);GO:0005216(ion channel activity);GO:0005230(extracellular ligand-gated ion channel activity);GO:0005515(protein binding);GO:0015276(ligand-gated ion channel activity);GO:0003009(skeletal muscle contraction);GO:0006810(transport);GO:0006811(ion transport);GO:0006812(cation transport);GO:0007271(syna…	04080(Neuroactive ligand-receptor interaction);04080(Neuroactive ligand-receptor interaction)			cholinergic receptor, nicotinic, delta polypeptide [Source:MGI Symbol;Acc:MGI:87893]	0.05	0.13	0.105933	0.757724	0.105579	0.915916	1	UP	No	No
ENSMUSG00000026253	Chrng	ENSMUST00000027470;ENSMUST00000189392	GO:0045211(postsynaptic membrane);GO:0016021(integral component of membrane);GO:0016020(membrane);GO:0060079(excitatory postsynaptic potential);GO:0060078(regulation of postsynaptic membrane potential);GO:0034220(ion transmembrane transport);GO:0006811(ion transport);GO:0006810(transport);GO:0022848(acetylcholine-gated cation-selective channel activity);GO:0005230(extracellular ligand-gated ion c…	04080(Neuroactive ligand-receptor interaction);04080(Neuroactive ligand-receptor interaction)			cholinergic receptor, nicotinic, gamma polypeptide [Source:MGI Symbol;Acc:MGI:87895]	0.01	0	-0.0143553	0.757724	-0.0131974	0.98947	1	DOWN	No	No
ENSMUSG00000026255	Efhd1	ENSMUST00000118687;ENSMUST00000027472;ENSMUST00000150831	GO:0005509(calcium ion binding);GO:0046872(metal ion binding);GO:0031175(neuron projection development);GO:0005739(mitochondrion);GO:0005743(mitochondrial inner membrane);GO:0016020(membrane);GO:0070062(extracellular exosome);GO:0070062(extracellular exosome)				EF hand domain containing 1 [Source:MGI Symbol;Acc:MGI:1921607]	0.15	0.11	-0.0510742	0.757724	-0.0527896	0.9579	1	DOWN	No	No
ENSMUSG00000026272	Agxt	ENSMUST00000027491	GO:0003824(catalytic activity);GO:0004760(serine-pyruvate transaminase activity);GO:0005102(receptor binding);GO:0008453(alanine-glyoxylate transaminase activity);GO:0008483(transaminase activity);GO:0016597(amino acid binding);GO:0016740(transferase activity);GO:0030170(pyridoxal phosphate binding);GO:0042803(protein homodimerization activity);GO:0043621(protein self-association);GO:0007219(Notc…	00250(Alanine, aspartate and glutamate metabolism);00260(Glycine, serine and threonine metabolism);00630(Glyoxylate and dicarboxylate metabolism);01200(Carbon metabolism);04146(Peroxisome)	K03430	EC:2.6.1.37	alanine-glyoxylate aminotransferase [Source:MGI Symbol;Acc:MGI:1329033]	0	0	0	0.757724	0				No	No
ENSMUSG00000026304	Rab17	ENSMUST00000027529;ENSMUST00000128226	GO:0000166(nucleotide binding);GO:0003924(GTPase activity);GO:0005515(protein binding);GO:0005525(GTP binding);GO:0019003(GDP binding);GO:0002415(immunoglobulin transcytosis in epithelial cells mediated by polymeric immunoglobulin receptor);GO:0006810(transport);GO:0007264(small GTPase mediated signal transduction);GO:0015031(protein transport);GO:0032401(establishment of melanosome localization)…				RAB17, member RAS oncogene family [Source:MGI Symbol;Acc:MGI:104640]	0.43	0.96	0.454839	0.757724	0.699463	0.484263	0.964424	UP	No	No
ENSMUSG00000026343	Gpr39	ENSMUST00000027581	GO:0016021(integral component of membrane);GO:0016020(membrane);GO:0007186(G-protein coupled receptor signaling pathway);GO:0007165(signal transduction);GO:0004930(G-protein coupled receptor activity);GO:0004871(signal transducer activity)				G protein-coupled receptor 39 [Source:MGI Symbol;Acc:MGI:1918361]	0.22	0.39	0.188204	0.757724	0.224356	0.82248	1	UP	No	No
ENSMUSG00000026354	Lct	ENSMUST00000073490	GO:0016021(integral component of membrane);GO:0016020(membrane);GO:0005887(integral component of plasma membrane);GO:1901657(glycosyl compound metabolic process);GO:0008152(metabolic process);GO:0005975(carbohydrate metabolic process);GO:0016798(hydrolase activity, acting on glycosyl bonds);GO:0016787(hydrolase activity);GO:0008422(beta-glucosidase activity);GO:0004553(hydrolase activity, hydroly…	00052(Galactose metabolism);04973(Carbohydrate digestion and absorption)			lactase [Source:MGI Symbol;Acc:MGI:104576]	0.21	0.16	-0.0608822	0.757724	-0.065987	0.947388	1	DOWN	No	No
ENSMUSG00000026380	Tfcp2l1	ENSMUST00000190652;ENSMUST00000027629	GO:0003677(DNA binding);GO:0005515(protein binding);GO:0000122(negative regulation of transcription from RNA polymerase II promoter);GO:0000902(cell morphogenesis);GO:0002070(epithelial cell maturation);GO:0006351(transcription, DNA-templated);GO:0006355(regulation of transcription, DNA-templated);GO:0007028(cytoplasm organization);GO:0007431(salivary gland development);GO:0008340(determination o…				transcription factor CP2-like 1 [Source:MGI Symbol;Acc:MGI:2444691]	0.34	0.11	-0.271673	0.757724	-0.30354	0.761478	1	DOWN	No	No
ENSMUSG00000026398	Nr5a2	ENSMUST00000027649;ENSMUST00000168126	GO:0000978(RNA polymerase II core promoter proximal region sequence-specific DNA binding);GO:0000980(RNA polymerase II distal enhancer sequence-specific DNA binding);GO:0001077(transcriptional activator activity, RNA polymerase II core promoter proximal region sequence-specific binding);GO:0003677(DNA binding);GO:0003682(chromatin binding);GO:0003690(double-stranded DNA binding);GO:0003700(transc…	04950(Maturity onset diabetes of the young);04950(Maturity onset diabetes of the young)			nuclear receptor subfamily 5, group A, member 2 [Source:MGI Symbol;Acc:MGI:1346834]	0.2	0.05	-0.192645	0.757724	-0.197961	0.843075	1	DOWN	No	No
ENSMUSG00000026418	Tnni1	ENSMUST00000187830;ENSMUST00000132795;ENSMUST00000152208;ENSMUST00000148201;ENSMUST00000129217	GO:0005861(troponin complex);GO:0003779(actin binding);GO:0046872(metal ion binding);GO:0003009(skeletal muscle contraction);GO:0014883(transition between fast and slow fiber);GO:0055010(ventricular cardiac muscle tissue morphogenesis);GO:0060048(cardiac muscle contraction);GO:0060048(cardiac muscle contraction)				troponin I, skeletal, slow 1 [Source:MGI Symbol;Acc:MGI:105073]	0.04	0.09	0.0677446	0.757724	0.065987	0.947388	1	UP	No	No
ENSMUSG00000026424	Gpr37l1	ENSMUST00000027682	GO:0004871(signal transducer activity);GO:0004930(G-protein coupled receptor activity);GO:0005515(protein binding);GO:0008528(G-protein coupled peptide receptor activity);GO:0036505(prosaposin receptor activity);GO:0042277(peptide binding);GO:0007165(signal transduction);GO:0007186(G-protein coupled receptor signaling pathway);GO:0007193(adenylate cyclase-inhibiting G-protein coupled receptor sig…				G protein-coupled receptor 37-like 1 [Source:MGI Symbol;Acc:MGI:1928503]	0	0	0	0.757724	0				No	No
ENSMUSG00000026442	Nfasc	ENSMUST00000094569;ENSMUST00000043189;ENSMUST00000187861;ENSMUST00000163770;ENSMUST00000186330;ENSMUST00000188307	GO:0005515(protein binding);GO:0019904(protein domain specific binding);GO:0086080(protein binding involved in heterotypic cell-cell adhesion);GO:0002175(protein localization to paranode region of axon);GO:0007155(cell adhesion);GO:0007411(axon guidance);GO:0007422(peripheral nervous system development);GO:0019226(transmission of nerve impulse);GO:0030913(paranodal junction assembly);GO:0034113(h…	04514(Cell adhesion molecules (CAMs));04514(Cell adhesion molecules (CAMs))			neurofascin [Source:MGI Symbol;Acc:MGI:104753]	0.06	0.04	-0.0274807	0.757724	-0.0263948	0.978942	1	DOWN	No	No
ENSMUSG00000026443	Lrrn2	ENSMUST00000027706	GO:0003674(molecular_function);GO:0007409(axonogenesis);GO:0005578(proteinaceous extracellular matrix);GO:0005615(extracellular space);GO:0016020(membrane);GO:0016021(integral component of membrane)				leucine rich repeat protein 2, neuronal [Source:MGI Symbol;Acc:MGI:106037]	0.01	0	-0.0143553	0.757724	-0.0131974	0.98947	1	DOWN	No	No
ENSMUSG00000026495	Efcab2	ENSMUST00000194861;ENSMUST00000027775;ENSMUST00000192905	GO:0005509(calcium ion binding);GO:0008150(biological_process);GO:0005575(cellular_component);GO:0005575(cellular_component)				EF-hand calcium binding domain 2 [Source:MGI Symbol;Acc:MGI:1915476]	0.23	0.56	0.342888	0.757724	0.435515	0.663189	1	UP	No	No
ENSMUSG00000026514	Cnih3	ENSMUST00000027795	GO:0016247(channel regulator activity);GO:0006810(transport);GO:0035249(synaptic transmission, glutamatergic);GO:0042391(regulation of membrane potential);GO:2000311(regulation of AMPA receptor activity);GO:0016020(membrane);GO:0016021(integral component of membrane);GO:0032281(AMPA glutamate receptor complex);GO:0043198(dendritic shaft);GO:0045211(postsynaptic membrane);GO:0051668(localization w…				cornichon family AMPA receptor auxiliary protein 3 [Source:MGI Symbol;Acc:MGI:1920228]	0	0.03	0.0426443	0.757724	0.0395922	0.968418	1	UP	No	No
ENSMUSG00000026532	Spta1	ENSMUST00000027817	GO:0003779(actin binding);GO:0005509(calcium ion binding);GO:0046872(metal ion binding);GO:0046982(protein heterodimerization activity);GO:0002260(lymphocyte homeostasis);GO:0006779(porphyrin-containing compound biosynthetic process);GO:0007009(plasma membrane organization);GO:0008360(regulation of cell shape);GO:0030036(actin cytoskeleton organization);GO:0030097(hemopoiesis);GO:0032092(positive…				spectrin alpha, erythrocytic 1 [Source:MGI Symbol;Acc:MGI:98385]	0.01	0	-0.0143553	0.757724	-0.0131974	0.98947	1	DOWN	No	No
ENSMUSG00000026582	Sele	ENSMUST00000027874	GO:0004888(transmembrane signaling receptor activity);GO:0005509(calcium ion binding);GO:0030246(carbohydrate binding);GO:0033691(sialic acid binding);GO:0043274(phospholipase binding);GO:0070492(oligosaccharide binding);GO:0002092(positive regulation of receptor internalization);GO:0007155(cell adhesion);GO:0007157(heterophilic cell-cell adhesion via plasma membrane cell adhesion molecules);GO:0…	04514(Cell adhesion molecules (CAMs));04668(TNF signaling pathway);05143(African trypanosomiasis);05144(Malaria)			selectin, endothelial cell [Source:MGI Symbol;Acc:MGI:98278]	0.15	0	-0.201634	0.757724	-0.197961	0.843075	1	DOWN	No	No
ENSMUSG00000026592	Tex35	ENSMUST00000027884;ENSMUST00000118207	GO:0015630(microtubule cytoskeleton);GO:0016021(integral component of membrane);GO:0016020(membrane);GO:0016020(membrane)				testis expressed 35 [Source:MGI Symbol;Acc:MGI:1920685]	0	0	0	0.757724	0				No	No
ENSMUSG00000026601	Axdnd1	ENSMUST00000177824;ENSMUST00000178036;ENSMUST00000213088;ENSMUST00000179572;ENSMUST00000180173;ENSMUST00000177858;ENSMUST00000179985					axonemal dynein light chain domain containing 1 [Source:MGI Symbol;Acc:MGI:1924602]	0.09	0.1	0.0131754	0.757724	0.0131974	0.98947	1	UP	No	No
ENSMUSG00000026602	Nphs2	ENSMUST00000027896	GO:0070062(extracellular exosome);GO:0045121(membrane raft);GO:0043234(protein complex);GO:0036057(slit diaphragm);GO:0031235(intrinsic component of the cytoplasmic side of the plasma membrane);GO:0016020(membrane);GO:0005911(cell-cell junction);GO:0005887(integral component of plasma membrane);GO:0072249(metanephric glomerular visceral epithelial cell development);GO:0031532(actin cytoskeleton r…				nephrosis 2, podocin [Source:MGI Symbol;Acc:MGI:2157018]	0.04	0.06	0.0274807	0.757724	0.0263948	0.978942	1	UP	No	No
ENSMUSG00000026610	Esrrg	ENSMUST00000110938	GO:0000977(RNA polymerase II regulatory region sequence-specific DNA binding);GO:0001228(transcriptional activator activity, RNA polymerase II transcription regulatory region sequence-specific binding);GO:0003677(DNA binding);GO:0003700(transcription factor activity, sequence-specific DNA binding);GO:0003707(steroid hormone receptor activity);GO:0003708(retinoic acid receptor activity);GO:0004879…				estrogen-related receptor gamma [Source:MGI Symbol;Acc:MGI:1347056]	0	0	0	0.757724	0				No	No
ENSMUSG00000026616	Cr2	ENSMUST00000195120;ENSMUST00000210219	GO:0016021(integral component of membrane);GO:0016020(membrane);GO:0001848(complement binding);GO:0003677(DNA binding);GO:0042803(protein homodimerization activity);GO:0030183(B cell differentiation);GO:0042100(B cell proliferation);GO:0043235(receptor complex);GO:0070062(extracellular exosome);GO:0070062(extracellular exosome)	04610(Complement and coagulation cascades);04640(Hematopoietic cell lineage);04662(B cell receptor signaling pathway);05169(Epstein-Barr virus infection);05169(Epstein-Barr virus infection)			complement receptor 2 [Source:MGI Symbol;Acc:MGI:88489]	0.02	0.01	-0.0142139	0.757724	-0.0131974	0.98947	1	DOWN	No	No
ENSMUSG00000026620	Mark1	ENSMUST00000027929	GO:0000166(nucleotide binding);GO:0000287(magnesium ion binding);GO:0001786(phosphatidylserine binding);GO:0004672(protein kinase activity);GO:0004674(protein serine/threonine kinase activity);GO:0005524(ATP binding);GO:0005546(phosphatidylinositol-4,5-bisphosphate binding);GO:0008289(lipid binding);GO:0016301(kinase activity);GO:0016740(transferase activity);GO:0046872(metal ion binding);GO:0050…		K04456	EC:2.7.11.1	MAP/microtubule affinity regulating kinase 1 [Source:MGI Symbol;Acc:MGI:2664902]	0.48	0.46	-0.0196288	0.757724	-0.0263948	0.978942	1	DOWN	No	No
ENSMUSG00000026621	Marc1	ENSMUST00000048462;ENSMUST00000110992;ENSMUST00000189492	GO:0003824(catalytic activity);GO:0008940(nitrate reductase activity);GO:0016491(oxidoreductase activity);GO:0030151(molybdenum ion binding);GO:0030170(pyridoxal phosphate binding);GO:0043546(molybdopterin cofactor binding);GO:0042126(nitrate metabolic process);GO:0055114(oxidation-reduction process);GO:0005739(mitochondrion);GO:0005741(mitochondrial outer membrane);GO:0005743(mitochondrial inner…				mitochondrial amidoxime reducing component 1 [Source:MGI Symbol;Acc:MGI:1913362]	0.14	0.08	-0.0780025	0.757724	-0.0791845	0.936886	1	DOWN	No	No
ENSMUSG00000026644	Acbd7	ENSMUST00000115089	GO:0000062(fatty-acyl-CoA binding);GO:0003674(molecular_function);GO:0008289(lipid binding);GO:0008150(biological_process);GO:0005575(cellular_component)				acyl-Coenzyme A binding domain containing 7 [Source:MGI Symbol;Acc:MGI:1925495]	0.11	0	-0.15056	0.757724	-0.145172	0.884575	1	DOWN	No	No
ENSMUSG00000026650	Meig1	ENSMUST00000064685;ENSMUST00000115082	GO:0007283(spermatogenesis);GO:0030154(cell differentiation);GO:0051321(meiotic cell cycle);GO:0005634(nucleus);GO:0005634(nucleus)				meiosis expressed gene 1 [Source:MGI Symbol;Acc:MGI:1202878]	0.05	0	-0.0703893	0.757724	-0.065987	0.947388	1	DOWN	No	No
ENSMUSG00000026679	Enkur	ENSMUST00000027992;ENSMUST00000147793;ENSMUST00000156248	GO:0005515(protein binding);GO:0005516(calmodulin binding);GO:0017124(SH3 domain binding);GO:0001669(acrosomal vesicle);GO:0005929(cilium);GO:0031514(motile cilium);GO:0042995(cell projection);GO:0097228(sperm principal piece);GO:0097228(sperm principal piece)				enkurin, TRPC channel interacting protein [Source:MGI Symbol;Acc:MGI:1918483]	0.12	0.03	-0.120854	0.757724	-0.118777	0.905452	1	DOWN	No	No
ENSMUSG00000026686	Lmx1a	ENSMUST00000028003	GO:0003677(DNA binding);GO:0008270(zinc ion binding);GO:0043565(sequence-specific DNA binding);GO:0046872(metal ion binding);GO:0006355(regulation of transcription, DNA-templated);GO:0005634(nucleus);GO:0000977(RNA polymerase II regulatory region sequence-specific DNA binding);GO:0001558(regulation of cell growth);GO:0006351(transcription, DNA-templated);GO:0007275(multicellular organism developm…				LIM homeobox transcription factor 1 alpha [Source:MGI Symbol;Acc:MGI:1888519]	0	0.03	0.0426443	0.757724	0.0395922	0.968418	1	UP	No	No
ENSMUSG00000026691	Fmo3	ENSMUST00000028010	GO:0004497(monooxygenase activity);GO:0004499(N,N-dimethylaniline monooxygenase activity);GO:0016491(oxidoreductase activity);GO:0034899(trimethylamine monooxygenase activity);GO:0050660(flavin adenine dinucleotide binding);GO:0050661(NADP binding);GO:0055114(oxidation-reduction process);GO:0005783(endoplasmic reticulum);GO:0005789(endoplasmic reticulum membrane);GO:0016020(membrane);GO:0016021(i…	00982(Drug metabolism - cytochrome P450)	K00485;K18277	EC:1.14.13.8;EC:1.14.13.148	flavin containing monooxygenase 3 [Source:MGI Symbol;Acc:MGI:1100496]	0.01	0.03	0.028289	0.757724	0.0263948	0.978942	1	UP	No	No
ENSMUSG00000026692	Fmo4	ENSMUST00000111525;ENSMUST00000144916	GO:0004497(monooxygenase activity);GO:0004499(N,N-dimethylaniline monooxygenase activity);GO:0016491(oxidoreductase activity);GO:0050660(flavin adenine dinucleotide binding);GO:0050661(NADP binding);GO:0042737(drug catabolic process);GO:0055114(oxidation-reduction process);GO:0005575(cellular_component);GO:0005783(endoplasmic reticulum);GO:0005789(endoplasmic reticulum membrane);GO:0016020(membra…	00982(Drug metabolism - cytochrome P450);00982(Drug metabolism - cytochrome P450)			flavin containing monooxygenase 4 [Source:MGI Symbol;Acc:MGI:2429497]	0.03	0	-0.0426443	0.757724	-0.0395922	0.968418	1	DOWN	No	No
ENSMUSG00000026697	Myoc	ENSMUST00000028020	GO:0001968(fibronectin binding);GO:0005109(frizzled binding);GO:0005515(protein binding);GO:0030971(receptor tyrosine kinase binding);GO:0032027(myosin light chain binding);GO:0046872(metal ion binding);GO:0001649(osteoblast differentiation);GO:0001952(regulation of cell-matrix adhesion);GO:0001953(negative regulation of cell-matrix adhesion);GO:0014068(positive regulation of phosphatidylinositol…				myocilin [Source:MGI Symbol;Acc:MGI:1202864]	0.01	0	-0.0143553	0.757724	-0.0131974	0.98947	1	DOWN	No	No
ENSMUSG00000026700	Tnfsf4	ENSMUST00000028024	GO:0016020(membrane);GO:0009986(cell surface);GO:0005615(extracellular space);GO:0071380(cellular response to prostaglandin E stimulus);GO:0071222(cellular response to lipopolysaccharide);GO:0050729(positive regulation of inflammatory response);GO:0042104(positive regulation of activated T cell proliferation);GO:0042098(T cell proliferation);GO:0032755(positive regulation of interleukin-6 product…	04060(Cytokine-cytokine receptor interaction)			tumor necrosis factor (ligand) superfamily, member 4 [Source:MGI Symbol;Acc:MGI:104511]	0.06	0.05	-0.0136749	0.757724	-0.0131974	0.98947	1	DOWN	No	No
ENSMUSG00000026765	Lypd6b	ENSMUST00000028103	GO:0003674(molecular_function);GO:0008150(biological_process);GO:0005575(cellular_component);GO:0005886(plasma membrane);GO:0016020(membrane);GO:0031225(anchored component of membrane)				LY6/PLAUR domain containing 6B [Source:MGI Symbol;Acc:MGI:1919147]	0.18	0.11	-0.0882272	0.757724	-0.0923819	0.926395	1	DOWN	No	No
ENSMUSG00000026770	Il2ra	ENSMUST00000028111;ENSMUST00000150890	GO:0004911(interleukin-2 receptor activity);GO:0005515(protein binding);GO:0008144(drug binding);GO:0002376(immune system process);GO:0002437(inflammatory response to antigenic stimulus);GO:0002664(regulation of T cell tolerance induction);GO:0006924(activation-induced cell death of T cells);GO:0006955(immune response);GO:0007219(Notch signaling pathway);GO:0038110(interleukin-2-mediated signalin…	04060(Cytokine-cytokine receptor interaction);04144(Endocytosis);04151(PI3K-Akt signaling pathway);04630(Jak-STAT signaling pathway);04640(Hematopoietic cell lineage);05162(Measles);05166(HTLV-I infection);05166(HTLV-I infection)			interleukin 2 receptor, alpha chain [Source:MGI Symbol;Acc:MGI:96549]	0.41	0.26	-0.162271	0.757724	-0.197961	0.843075	1	DOWN	No	No
ENSMUSG00000026774	4931423N10Rik	ENSMUST00000028113	GO:0003674(molecular_function);GO:0008150(biological_process);GO:0005575(cellular_component)				RIKEN cDNA 4931423N10 gene [Source:MGI Symbol;Acc:MGI:1918231]	0	0.01	0.0143553	0.757724	0.0131974	0.98947	1	UP	No	No
ENSMUSG00000026787	Gad2	ENSMUST00000028123	GO:0003824(catalytic activity);GO:0004351(glutamate decarboxylase activity);GO:0016595(glutamate binding);GO:0016829(lyase activity);GO:0016831(carboxy-lyase activity);GO:0030170(pyridoxal phosphate binding);GO:0046982(protein heterodimerization activity);GO:0006540(glutamate decarboxylation to succinate);GO:0019752(carboxylic acid metabolic process);GO:0042136(neurotransmitter biosynthetic proce…	00250(Alanine, aspartate and glutamate metabolism);00410(beta-Alanine metabolism);00430(Taurine and hypotaurine metabolism);00650(Butanoate metabolism);04727(GABAergic synapse);04940(Type I diabetes mellitus)			glutamic acid decarboxylase 2 [Source:MGI Symbol;Acc:MGI:95634]	0	0.01	0.0143553	0.757724	0.0131974	0.98947	1	UP	No	No
ENSMUSG00000026805	Barhl1	ENSMUST00000050776;ENSMUST00000124059;ENSMUST00000113847	GO:0000977(RNA polymerase II regulatory region sequence-specific DNA binding);GO:0001077(transcriptional activator activity, RNA polymerase II core promoter proximal region sequence-specific binding);GO:0003677(DNA binding);GO:0043565(sequence-specific DNA binding);GO:0001764(neuron migration);GO:0006351(transcription, DNA-templated);GO:0006355(regulation of transcription, DNA-templated);GO:00063…				BarH-like 1 (Drosophila) [Source:MGI Symbol;Acc:MGI:1859288]	0	0.01	0.0143553	0.757724	0.0131974	0.98947	1	UP	No	No
ENSMUSG00000026815	Gfi1b	ENSMUST00000164290;ENSMUST00000028156	GO:0001085(RNA polymerase II transcription factor binding);GO:0003676(nucleic acid binding);GO:0003677(DNA binding);GO:0005515(protein binding);GO:0046872(metal ion binding);GO:0006351(transcription, DNA-templated);GO:0006355(regulation of transcription, DNA-templated);GO:0007275(multicellular organism development);GO:0030097(hemopoiesis);GO:0030854(positive regulation of granulocyte differentiat…				growth factor independent 1B [Source:MGI Symbol;Acc:MGI:1276578]	0.03	0	-0.0426443	0.757724	-0.0395922	0.968418	1	DOWN	No	No
ENSMUSG00000026829	Gbgt1	ENSMUST00000127958;ENSMUST00000163121;ENSMUST00000028172	GO:0016740(transferase activity);GO:0016757(transferase activity, transferring glycosyl groups);GO:0016758(transferase activity, transferring hexosyl groups);GO:0046872(metal ion binding);GO:0047277(globoside alpha-N-acetylgalactosaminyltransferase activity);GO:0005975(carbohydrate metabolic process);GO:0006486(protein glycosylation);GO:0009247(glycolipid biosynthetic process);GO:0030259(lipid gl…	00603(Glycosphingolipid biosynthesis - globo series);00603(Glycosphingolipid biosynthesis - globo series)			globoside alpha-1,3-N-acetylgalactosaminyltransferase 1 [Source:MGI Symbol;Acc:MGI:2449143]	1.46	1.14	-0.201048	0.757724	-0.422317	0.672794	1	DOWN	No	No
ENSMUSG00000026831	1700007K13Rik	ENSMUST00000086370	GO:0003674(molecular_function);GO:0008150(biological_process);GO:0005575(cellular_component)				RIKEN cDNA 1700007K13 gene [Source:MGI Symbol;Acc:MGI:1916577]	0	0	0	0.757724	0				No	No
ENSMUSG00000026835	Fcnb	ENSMUST00000028179	GO:0001664(G-protein coupled receptor binding);GO:0008329(signaling pattern recognition receptor activity);GO:0030246(carbohydrate binding);GO:0033691(sialic acid binding);GO:0046872(metal ion binding);GO:0097367(carbohydrate derivative binding);GO:0001867(complement activation, lectin pathway);GO:0002376(immune system process);GO:0002752(cell surface pattern recognition receptor signaling pathwa…				ficolin B [Source:MGI Symbol;Acc:MGI:1341158]	0	0	0	0.757724	0				No	No
ENSMUSG00000026840	Lamc3	ENSMUST00000028187;ENSMUST00000135995	GO:0000904(cell morphogenesis involved in differentiation);GO:0007155(cell adhesion);GO:0007601(visual perception);GO:0014002(astrocyte development);GO:0030198(extracellular matrix organization);GO:0060041(retina development in camera-type eye);GO:0005576(extracellular region);GO:0005578(proteinaceous extracellular matrix);GO:0005604(basement membrane);GO:0005604(basement membrane)	04151(PI3K-Akt signaling pathway);04510(Focal adhesion);04512(ECM-receptor interaction);05145(Toxoplasmosis);05146(Amoebiasis);05200(Pathways in cancer);05222(Small cell lung cancer);05222(Small cell lung cancer)			laminin gamma 3 [Source:MGI Symbol;Acc:MGI:1344394]	0.06	0.08	0.026967	0.757724	0.0263948	0.978942	1	UP	No	No
ENSMUSG00000026841	Fibcd1	ENSMUST00000028188	GO:0016021(integral component of membrane);GO:0016020(membrane);GO:0046872(metal ion binding);GO:0008061(chitin binding)				fibrinogen C domain containing 1 [Source:MGI Symbol;Acc:MGI:2138953]	0.01	0.02	0.0142139	0.757724	0.0131974	0.98947	1	UP	No	No
ENSMUSG00000026866	Kynu	ENSMUST00000028223;ENSMUST00000112826;ENSMUST00000050511	GO:0005829(cytosol);GO:0005739(mitochondrion);GO:0005737(cytoplasm);GO:0097053(L-kynurenine catabolic process);GO:0043420(anthranilate metabolic process);GO:0034516(response to vitamin B6);GO:0034354('de novo' NAD biosynthetic process from tryptophan);GO:0034341(response to interferon-gamma);GO:0019805(quinolinate biosynthetic process);GO:0019442(tryptophan catabolic process to acetyl-CoA);GO:001…	00380(Tryptophan metabolism);00380(Tryptophan metabolism)	K01556	EC:3.7.1.3	kynureninase (L-kynurenine hydrolase) [Source:MGI Symbol;Acc:MGI:1918039]	0.04	0.04	0	0.757724	0	1	1		No	No
ENSMUSG00000026874	Hc	ENSMUST00000028233;ENSMUST00000125549	GO:0004866(endopeptidase inhibitor activity);GO:0001701(in utero embryonic development);GO:0002376(immune system process);GO:0006954(inflammatory response);GO:0006957(complement activation, alternative pathway);GO:0006958(complement activation, classical pathway);GO:0010575(positive regulation of vascular endothelial growth factor production);GO:0010760(negative regulation of macrophage chemotaxi…	04610(Complement and coagulation cascades);05020(Prion diseases);05133(Pertussis);05150(Staphylococcus aureus infection);05168(Herpes simplex infection);05322(Systemic lupus erythematosus);05322(Systemic lupus erythematosus)			hemolytic complement [Source:MGI Symbol;Acc:MGI:96031]	0	0.01	0.0143553	0.757724	0.0131974	0.98947	1	UP	No	No
ENSMUSG00000026893	Gca	ENSMUST00000028257;ENSMUST00000148083	GO:0004198(calcium-dependent cysteine-type endopeptidase activity);GO:0005509(calcium ion binding);GO:0042803(protein homodimerization activity);GO:0046872(metal ion binding);GO:0046982(protein heterodimerization activity);GO:0006508(proteolysis);GO:0005737(cytoplasm);GO:0005829(cytosol);GO:0005886(plasma membrane);GO:0016020(membrane);GO:0070062(extracellular exosome);GO:0070062(extracellular ex…				grancalcin [Source:MGI Symbol;Acc:MGI:1918521]	0.4	0.15	-0.283793	0.757724	-0.329935	0.741449	1	DOWN	No	No
ENSMUSG00000026904	Slc4a10	ENSMUST00000102735	GO:0005215(transporter activity);GO:0005452(inorganic anion exchanger activity);GO:0008509(anion transmembrane transporter activity);GO:0015293(symporter activity);GO:0015297(antiporter activity);GO:0015301(anion:anion antiporter activity);GO:0006486(protein glycosylation);GO:0006810(transport);GO:0006811(ion transport);GO:0006814(sodium ion transport);GO:0006820(anion transport);GO:0006885(regul…				solute carrier family 4, sodium bicarbonate cotransporter-like, member 10 [Source:MGI Symbol;Acc:MGI:2150150]	0.01	0	-0.0143553	0.757724	-0.0131974	0.98947	1	DOWN	No	No
ENSMUSG00000026919	Lcn4	ENSMUST00000028283	GO:0005550(pheromone binding);GO:0006810(transport);GO:0008150(biological_process);GO:0005575(cellular_component);GO:0005576(extracellular region)				lipocalin 4 [Source:MGI Symbol;Acc:MGI:102668]	0.08	0	-0.111031	0.757724	-0.105579	0.915916	1	DOWN	No	No
ENSMUSG00000026976	Pax8	ENSMUST00000028355	GO:0000978(RNA polymerase II core promoter proximal region sequence-specific DNA binding);GO:0000979(RNA polymerase II core promoter sequence-specific DNA binding);GO:0001077(transcriptional activator activity, RNA polymerase II core promoter proximal region sequence-specific binding);GO:0003677(DNA binding);GO:0003700(transcription factor activity, sequence-specific DNA binding);GO:0005515(prote…	04918(Thyroid hormone synthesis);05200(Pathways in cancer);05202(Transcriptional misregulation in cancers);05216(Thyroid cancer)			paired box 8 [Source:MGI Symbol;Acc:MGI:97492]	0	0.02	0.0285692	0.757724	0.0263948	0.978942	1	UP	No	No
ENSMUSG00000026983	Il1f5	ENSMUST00000028360	GO:0005125(cytokine activity);GO:0005149(interleukin-1 receptor binding);GO:0005152(interleukin-1 receptor antagonist activity);GO:0001960(negative regulation of cytokine-mediated signaling pathway);GO:0002376(immune system process);GO:0006954(inflammatory response);GO:0006955(immune response);GO:0019221(cytokine-mediated signaling pathway);GO:0019732(antifungal humoral response);GO:0032700(negat…				interleukin 1 family, member 5 (delta) [Source:MGI Symbol;Acc:MGI:1859325]	0.01	0	-0.0143553	0.757724	-0.0131974	0.98947	1	DOWN	No	No
ENSMUSG00000026994	Galnt3	ENSMUST00000028378;ENSMUST00000150793;ENSMUST00000153563	GO:0005794(Golgi apparatus);GO:0004653(polypeptide N-acetylgalactosaminyltransferase activity);GO:0005509(calcium ion binding);GO:0016740(transferase activity);GO:0016757(transferase activity, transferring glycosyl groups);GO:0030145(manganese ion binding);GO:0030246(carbohydrate binding);GO:0046872(metal ion binding);GO:0006486(protein glycosylation);GO:0018242(protein O-linked glycosylation via…	00512(Mucin type O-glycan biosynthesis);00512(Mucin type O-glycan biosynthesis)			UDP-N-acetyl-alpha-D-galactosamine:polypeptide N-acetylgalactosaminyltransferase 3 [Source:MGI Symbol;Acc:MGI:894695]	0.64	0.42	-0.207805	0.757724	-0.290343	0.771554	1	DOWN	No	No
ENSMUSG00000027004	Frzb	ENSMUST00000028389;ENSMUST00000142459	GO:0005515(protein binding);GO:0017147(Wnt-protein binding);GO:0007275(multicellular organism development);GO:0008285(negative regulation of cell proliferation);GO:0010721(negative regulation of cell development);GO:0014033(neural crest cell differentiation);GO:0016055(Wnt signaling pathway);GO:0030154(cell differentiation);GO:0030178(negative regulation of Wnt signaling pathway);GO:0030308(negat…				frizzled-related protein [Source:MGI Symbol;Acc:MGI:892032]	0.38	0.15	-0.263034	0.757724	-0.30354	0.761478	1	DOWN	No	No
ENSMUSG00000027016	Zfp385b	ENSMUST00000111830;ENSMUST00000090766;ENSMUST00000151388	GO:0046872(metal ion binding);GO:0008270(zinc ion binding);GO:0003676(nucleic acid binding);GO:0002039(p53 binding);GO:0003723(RNA binding);GO:0006915(apoptotic process);GO:0072332(intrinsic apoptotic signaling pathway by p53 class mediator);GO:0001650(fibrillar center);GO:0005634(nucleus);GO:0005634(nucleus)				zinc finger protein 385B [Source:MGI Symbol;Acc:MGI:2444734]	0.03	0.01	-0.028289	0.757724	-0.0263948	0.978942	1	DOWN	No	No
ENSMUSG00000027048	Abcb11	ENSMUST00000102709	GO:0000166(nucleotide binding);GO:0005524(ATP binding);GO:0015126(canalicular bile acid transmembrane transporter activity);GO:0016887(ATPase activity);GO:0042626(ATPase activity, coupled to transmembrane movement of substances);GO:0006810(transport);GO:0015721(bile acid and bile salt transport);GO:0015722(canalicular bile acid transport);GO:0055085(transmembrane transport);GO:0016020(membrane);G…	02010(ABC transporters);04976(Bile secretion)			ATP-binding cassette, sub-family B (MDR/TAP), member 11 [Source:MGI Symbol;Acc:MGI:1351619]	0.02	0.01	-0.0142139	0.757724	-0.0131974	0.98947	1	DOWN	No	No
ENSMUSG00000027070	Lrp2	ENSMUST00000080953	GO:0070062(extracellular exosome);GO:0045177(apical part of cell);GO:0043235(receptor complex);GO:0031526(brush border membrane);GO:0030139(endocytic vesicle);GO:0016324(apical plasma membrane);GO:0016021(integral component of membrane);GO:0016020(membrane);GO:0005905(clathrin-coated pit);GO:0005903(brush border);GO:0005794(Golgi apparatus);GO:0005783(endoplasmic reticulum);GO:0005768(endosome);G…	04340(Hedgehog signaling pathway);04918(Thyroid hormone synthesis)			low density lipoprotein receptor-related protein 2 [Source:MGI Symbol;Acc:MGI:95794]	0.18	0.14	-0.049753	0.757724	-0.0527896	0.9579	1	DOWN	No	No
ENSMUSG00000027073	Prg2	ENSMUST00000028467	GO:0006955(immune response);GO:0070062(extracellular exosome);GO:0030246(carbohydrate binding);GO:0002215(defense response to nematode);GO:0002376(immune system process);GO:0032693(negative regulation of interleukin-10 production);GO:0032753(positive regulation of interleukin-4 production);GO:0042035(regulation of cytokine biosynthetic process);GO:0042742(defense response to bacterium);GO:0005576…	05310(Asthma)			proteoglycan 2, bone marrow [Source:MGI Symbol;Acc:MGI:103294]	0	0.11	0.15056	0.757724	0.145172	0.884575	1	UP	No	No
ENSMUSG00000027171	Prrg4	ENSMUST00000028593;ENSMUST00000126824	GO:0005509(calcium ion binding);GO:0005576(extracellular region);GO:0016020(membrane);GO:0016021(integral component of membrane);GO:0003674(molecular_function);GO:0008150(biological_process);GO:0008150(biological_process)				proline rich Gla (G-carboxyglutamic acid) 4 (transmembrane) [Source:MGI Symbol;Acc:MGI:2442211]	0.76	0.97	0.16262	0.757724	0.277146	0.781668	1	UP	No	No
ENSMUSG00000027202	Slc12a1	ENSMUST00000110494	GO:0016021(integral component of membrane);GO:0016020(membrane);GO:1902476(chloride transmembrane transport);GO:0055085(transmembrane transport);GO:0006821(chloride transport);GO:0006811(ion transport);GO:0006810(transport);GO:0015377(cation:chloride symporter activity);GO:0005215(transporter activity);GO:0070062(extracellular exosome)				solute carrier family 12, member 1 [Source:MGI Symbol;Acc:MGI:103150]	0.04	0	-0.0565835	0.757724	-0.0527896	0.9579	1	DOWN	No	No
ENSMUSG00000027210	Meis2	ENSMUST00000028639;ENSMUST00000102538;ENSMUST00000110907;ENSMUST00000110908;ENSMUST00000110906;ENSMUST00000074285;ENSMUST00000189640;ENSMUST00000151279;ENSMUST00000118654;ENSMUST00000150477;ENSMUST00000154671;ENSMUST00000140461;ENSMUST00000135543;ENSMUST00000138526	GO:0000978(RNA polymerase II core promoter proximal region sequence-specific DNA binding);GO:0001077(transcriptional activator activity, RNA polymerase II core promoter proximal region sequence-specific binding);GO:0003677(DNA binding);GO:0003712(transcription cofactor activity);GO:0008134(transcription factor binding);GO:0043565(sequence-specific DNA binding);GO:0001654(eye development);GO:00063…				Meis homeobox 2 [Source:MGI Symbol;Acc:MGI:108564]	0.89	0.67	-0.178538	0.757724	-0.290343	0.771554	1	DOWN	No	No
ENSMUSG00000027238	Frmd5	ENSMUST00000138157;ENSMUST00000121219	GO:0005856(cytoskeleton);GO:0005200(structural constituent of cytoskeleton);GO:0008092(cytoskeletal protein binding);GO:0031032(actomyosin structure organization);GO:0005737(cytoplasm);GO:0019898(extrinsic component of membrane);GO:0016021(integral component of membrane);GO:0016020(membrane);GO:0016020(membrane)				FERM domain containing 5 [Source:MGI Symbol;Acc:MGI:2442557]	0.03	0.02	-0.0140752	0.757724	-0.0131974	0.98947	1	DOWN	No	No
ENSMUSG00000027253	Lrp4	ENSMUST00000028689;ENSMUST00000123897	GO:0016600(flotillin complex);GO:0005509(calcium ion binding);GO:0005515(protein binding);GO:0017147(Wnt-protein binding);GO:0030971(receptor tyrosine kinase binding);GO:0034185(apolipoprotein binding);GO:0042803(protein homodimerization activity);GO:0042813(Wnt-activated receptor activity);GO:0097110(scaffold protein binding);GO:0001822(kidney development);GO:0001932(regulation of protein phosph…				low density lipoprotein receptor-related protein 4 [Source:MGI Symbol;Acc:MGI:2442252]	0.46	0.39	-0.0708835	0.757724	-0.0923819	0.926395	1	DOWN	No	No
ENSMUSG00000027273	Snap25	ENSMUST00000028727;ENSMUST00000125486;ENSMUST00000110098	GO:0008076(voltage-gated potassium channel complex);GO:0031083(BLOC-1 complex);GO:0031982(vesicle);GO:0000149(SNARE binding);GO:0005484(SNAP receptor activity);GO:0005515(protein binding);GO:0017075(syntaxin-1 binding);GO:0048306(calcium-dependent protein binding);GO:0007269(neurotransmitter secretion);GO:0007626(locomotory behavior);GO:0008306(associative learning);GO:0010975(regulation of neuro…	04721(Synaptic vesicle cycle);04911(Insulin secretion);04911(Insulin secretion)			synaptosomal-associated protein 25 [Source:MGI Symbol;Acc:MGI:98331]	0.24	0.05	-0.239951	0.757724	-0.250751	0.802007	1	DOWN	No	No
ENSMUSG00000027297	Ltk	ENSMUST00000140224;ENSMUST00000127470;ENSMUST00000028759;ENSMUST00000134295	GO:0016021(integral component of membrane);GO:0016020(membrane);GO:0018108(peptidyl-tyrosine phosphorylation);GO:0007169(transmembrane receptor protein tyrosine kinase signaling pathway);GO:0006468(protein phosphorylation);GO:0005524(ATP binding);GO:0004714(transmembrane receptor protein tyrosine kinase activity);GO:0004713(protein tyrosine kinase activity);GO:0004672(protein kinase activity);GO:…				leukocyte tyrosine kinase [Source:MGI Symbol;Acc:MGI:96840]	0.02	0.04	0.0280144	0.757724	0.0263948	0.978942	1	UP	No	No
ENSMUSG00000027301	Oxt	ENSMUST00000028764	GO:0005179(hormone activity);GO:0005184(neuropeptide hormone activity);GO:0005185(neurohypophyseal hormone activity);GO:0031855(oxytocin receptor binding);GO:0001975(response to amphetamine);GO:0002027(regulation of heart rate);GO:0002125(maternal aggressive behavior);GO:0007204(positive regulation of cytosolic calcium ion concentration);GO:0007507(heart development);GO:0007565(female pregnancy);…	04080(Neuroactive ligand-receptor interaction);04921(Oxytocin signaling pathway)			oxytocin [Source:MGI Symbol;Acc:MGI:97453]	0	0	0	0.757724	0				No	No
ENSMUSG00000027324	Rpusd2	ENSMUST00000028796	GO:0003723(RNA binding);GO:0009982(pseudouridine synthase activity);GO:0001522(pseudouridine synthesis);GO:0009451(RNA modification)				RNA pseudouridylate synthase domain containing 2 [Source:MGI Symbol;Acc:MGI:1918066]	0.73	1.96	0.774825	0.757724	1.62328	0.104529	0.274922	UP	No	No
ENSMUSG00000027335	Adra1d	ENSMUST00000103184	GO:0016021(integral component of membrane);GO:0016020(membrane);GO:0005886(plasma membrane);GO:0071875(adrenergic receptor signaling pathway);GO:0007186(G-protein coupled receptor signaling pathway);GO:0007165(signal transduction);GO:0004937(alpha1-adrenergic receptor activity);GO:0004935(adrenergic receptor activity);GO:0004930(G-protein coupled receptor activity);GO:0004871(signal transducer ac…	04020(Calcium signaling pathway);04022(cGMP - PKG signaling pathway);04080(Neuroactive ligand-receptor interaction);04261(Adrenergic signaling in cardiomyocytes);04270(Vascular smooth muscle contraction);04970(Salivary secretion)			adrenergic receptor, alpha 1d [Source:MGI Symbol;Acc:MGI:106673]	0.11	0	-0.15056	0.757724	-0.145172	0.884575	1	DOWN	No	No
ENSMUSG00000027350	Chgb	ENSMUST00000028826	GO:0005515(protein binding);GO:0005576(extracellular region);GO:0030141(secretory granule)				chromogranin B [Source:MGI Symbol;Acc:MGI:88395]	0.04	0.02	-0.0280144	0.757724	-0.0263948	0.978942	1	DOWN	No	No
ENSMUSG00000027386	Fbln7	ENSMUST00000110324;ENSMUST00000028864	GO:0005509(calcium ion binding);GO:0008201(heparin binding);GO:0007155(cell adhesion);GO:0005576(extracellular region);GO:0005578(proteinaceous extracellular matrix);GO:0005925(focal adhesion);GO:0070062(extracellular exosome);GO:0070062(extracellular exosome)				fibulin 7 [Source:MGI Symbol;Acc:MGI:1917620]	0.22	0.48	0.278716	0.757724	0.343133	0.731499	1	UP	No	No
ENSMUSG00000027399	Il1a	ENSMUST00000028882	GO:0005125(cytokine activity);GO:0005149(interleukin-1 receptor binding);GO:0005507(copper ion binding);GO:0001660(fever generation);GO:0002248(connective tissue replacement involved in inflammatory response wound healing);GO:0006954(inflammatory response);GO:0006955(immune response);GO:0008285(negative regulation of cell proliferation);GO:0010575(positive regulation of vascular endothelial growt…	04010(MAPK signaling pathway);04060(Cytokine-cytokine receptor interaction);04210(Apoptosis);04380(Osteoclast differentiation);04640(Hematopoietic cell lineage);04932(Non-alcoholic fatty liver disease (NAFLD));04940(Type I diabetes mellitus);05020(Prion diseases);05132(Salmonella infection);05133(Pertussis);05140(Leishmaniasis);05152(Tuberculosis);05162(Measles);05164(Influenza A);05321(Inflammat…			interleukin 1 alpha [Source:MGI Symbol;Acc:MGI:96542]	0.71	0.45	-0.237943	0.757724	-0.343133	0.731499	1	DOWN	No	No
ENSMUSG00000027401	Tgm3	ENSMUST00000110299	GO:0003810(protein-glutamine gamma-glutamyltransferase activity);GO:0003824(catalytic activity);GO:0005509(calcium ion binding);GO:0016740(transferase activity);GO:0016746(transferase activity, transferring acyl groups);GO:0046872(metal ion binding);GO:0008544(epidermis development);GO:0018149(peptide cross-linking);GO:0030216(keratinocyte differentiation);GO:0031424(keratinization);GO:0035315(ha…				transglutaminase 3, E polypeptide [Source:MGI Symbol;Acc:MGI:98732]	0.01	0	-0.0143553	0.757724	-0.0131974	0.98947	1	DOWN	No	No
ENSMUSG00000027419	Pcsk2	ENSMUST00000028905	GO:0004175(endopeptidase activity);GO:0004252(serine-type endopeptidase activity);GO:0008233(peptidase activity);GO:0008236(serine-type peptidase activity);GO:0016787(hydrolase activity);GO:0032403(protein complex binding);GO:0006508(proteolysis);GO:0007399(nervous system development);GO:0016485(protein processing);GO:0016486(peptide hormone processing);GO:0016540(protein autoprocessing);GO:00300…				proprotein convertase subtilisin/kexin type 2 [Source:MGI Symbol;Acc:MGI:97512]	0.01	0	-0.0143553	0.757724	-0.0131974	0.98947	1	DOWN	No	No
ENSMUSG00000027420	Bfsp1	ENSMUST00000099296;ENSMUST00000028907	GO:0016020(membrane);GO:0005938(cell cortex);GO:0005886(plasma membrane);GO:0005882(intermediate filament);GO:0005856(cytoskeleton);GO:0005737(cytoplasm);GO:0070307(lens fiber cell development);GO:0048469(cell maturation);GO:0005515(protein binding);GO:0005212(structural constituent of eye lens);GO:0005198(structural molecule activity);GO:0005198(structural molecule activity)				beaded filament structural protein 1, in lens-CP94 [Source:MGI Symbol;Acc:MGI:101770]	0.05	0.1	0.0671142	0.757724	0.065987	0.947388	1	UP	No	No
ENSMUSG00000027438	Napb	ENSMUST00000028926;ENSMUST00000140647	GO:0005483(soluble NSF attachment protein activity);GO:0005515(protein binding);GO:0019905(syntaxin binding);GO:0006810(transport);GO:0006886(intracellular protein transport);GO:0010807(regulation of synaptic vesicle priming);GO:0015031(protein transport);GO:0016192(vesicle-mediated transport);GO:0035249(synaptic transmission, glutamatergic);GO:0035494(SNARE complex disassembly);GO:0048488(synapt…				N-ethylmaleimide sensitive fusion protein attachment protein beta [Source:MGI Symbol;Acc:MGI:104562]	0.38	0.25	-0.14274	0.757724	-0.171566	0.863778	1	DOWN	No	No
ENSMUSG00000027457	Snph	ENSMUST00000109875;ENSMUST00000109877;ENSMUST00000146172;ENSMUST00000133378	GO:0017075(syntaxin-1 binding);GO:0006906(vesicle fusion);GO:0045806(negative regulation of endocytosis);GO:0005737(cytoplasm);GO:0005739(mitochondrion);GO:0005881(cytoplasmic microtubule);GO:0016020(membrane);GO:0016021(integral component of membrane);GO:0030054(cell junction);GO:0043005(neuron projection);GO:0045202(synapse);GO:0007420(brain development);GO:0030182(neuron differentiation);GO:00…				syntaphilin [Source:MGI Symbol;Acc:MGI:2139270]	0.12	0.05	-0.0931094	0.757724	-0.0923819	0.926395	1	DOWN	No	No
ENSMUSG00000027460	Angpt4	ENSMUST00000028955	GO:0030297(transmembrane receptor protein tyrosine kinase activator activity);GO:0030971(receptor tyrosine kinase binding);GO:0001525(angiogenesis);GO:0007171(activation of transmembrane receptor protein tyrosine kinase activity);GO:0010595(positive regulation of endothelial cell migration);GO:0016525(negative regulation of angiogenesis);GO:0043066(negative regulation of apoptotic process);GO:004…	04014(Ras signaling pathway);04015(Rap1 signaling pathway);04066(HIF-1 signaling pathway);04151(PI3K-Akt signaling pathway)			angiopoietin 4 [Source:MGI Symbol;Acc:MGI:1336887]	0.05	0.1	0.0671142	0.757724	0.065987	0.947388	1	UP	No	No
ENSMUSG00000027474	Ccm2l	ENSMUST00000127898;ENSMUST00000127549;ENSMUST00000129377;ENSMUST00000109800	GO:0005515(protein binding);GO:0003209(cardiac atrium morphogenesis);GO:0003222(ventricular trabecula myocardium morphogenesis);GO:0032091(negative regulation of protein binding);GO:0034111(negative regulation of homotypic cell-cell adhesion);GO:0042060(wound healing);GO:0055017(cardiac muscle tissue growth);GO:0090271(positive regulation of fibroblast growth factor production);GO:0005575(cellula…				cerebral cavernous malformation 2-like [Source:MGI Symbol;Acc:MGI:2385159]	0.65	0.57	-0.0717015	0.757724	-0.105579	0.915916	1	DOWN	No	No
ENSMUSG00000027478	Dnmt3b	ENSMUST00000072997;ENSMUST00000109773;ENSMUST00000103151;ENSMUST00000056495;ENSMUST00000088976;ENSMUST00000103150;ENSMUST00000109772;ENSMUST00000109771;ENSMUST00000132132;ENSMUST00000140811	GO:0003677(DNA binding);GO:0003714(transcription corepressor activity);GO:0003886(DNA (cytosine-5-)-methyltransferase activity);GO:0005515(protein binding);GO:0008168(methyltransferase activity);GO:0009008(DNA-methyltransferase activity);GO:0016740(transferase activity);GO:0046872(metal ion binding);GO:0051719(DNA (cytosine-5-)-methyltransferase activity, acting on CpN substrates);GO:0000122(nega…	00270(Cysteine and methionine metabolism);05206(MicroRNAs in cancer);05206(MicroRNAs in cancer)			DNA methyltransferase 3B [Source:MGI Symbol;Acc:MGI:1261819]	1.48	1.54	0.0344884	0.757724	0.0791845	0.936886	1	UP	No	No
ENSMUSG00000027505	Fam209	ENSMUST00000029007	GO:0016021(integral component of membrane);GO:0016020(membrane);GO:0005634(nucleus);GO:0008150(biological_process);GO:0003674(molecular_function)				family with sequence similarity 209 [Source:MGI Symbol;Acc:MGI:1923676]	0.26	0.09	-0.209096	0.757724	-0.224356	0.82248	1	DOWN	No	No
ENSMUSG00000027525	Phactr3	ENSMUST00000108917	GO:0050790(regulation of catalytic activity);GO:0043086(negative regulation of catalytic activity);GO:0019888(protein phosphatase regulator activity);GO:0008157(protein phosphatase 1 binding);GO:0004864(protein phosphatase inhibitor activity);GO:0003779(actin binding);GO:0008150(biological_process);GO:0005634(nucleus);GO:0005654(nucleoplasm);GO:0016363(nuclear matrix)				phosphatase and actin regulator 3 [Source:MGI Symbol;Acc:MGI:1921439]	0	0	0	0.757724	0				No	No
ENSMUSG00000027556	Car1	ENSMUST00000181860	GO:0004064(arylesterase activity);GO:0004089(carbonate dehydratase activity);GO:0008270(zinc ion binding);GO:0016829(lyase activity);GO:0016836(hydro-lyase activity);GO:0046872(metal ion binding);GO:0006730(one-carbon metabolic process);GO:0005737(cytoplasm);GO:0070062(extracellular exosome)	00910(Nitrogen metabolism)	K18245	EC:4.2.1.1	carbonic anhydrase 1 [Source:MGI Symbol;Acc:MGI:88268]	0	0	0	0.757724	0				No	No
ENSMUSG00000027560	Dok5	ENSMUST00000029075	GO:0005057(signal transducer activity, downstream of receptor);GO:0005158(insulin receptor binding);GO:0005515(protein binding);GO:0000165(MAPK cascade);GO:0007169(transmembrane receptor protein tyrosine kinase signaling pathway);GO:0007399(nervous system development);GO:0051386(regulation of neurotrophin TRK receptor signaling pathway);GO:0005622(intracellular)				docking protein 5 [Source:MGI Symbol;Acc:MGI:1924079]	0.01	0.03	0.028289	0.757724	0.0263948	0.978942	1	UP	No	No
ENSMUSG00000027570	Col9a3	ENSMUST00000132527;ENSMUST00000141056;ENSMUST00000129090;ENSMUST00000165879;ENSMUST00000165224	GO:0005594(collagen type IX trimer);GO:0005581(collagen trimer);GO:0008585(female gonad development);GO:0008584(male gonad development);GO:0008584(male gonad development)	04974(Protein digestion and absorption);04974(Protein digestion and absorption)			collagen, type IX, alpha 3 [Source:MGI Symbol;Acc:MGI:894686]	0.3	0.24	-0.0681715	0.757724	-0.0791845	0.936886	1	DOWN	No	No
ENSMUSG00000027577	Chrna4	ENSMUST00000067120	GO:0045211(postsynaptic membrane);GO:0045202(synapse);GO:0030054(cell junction);GO:0016021(integral component of membrane);GO:0016020(membrane);GO:0005886(plasma membrane);GO:0060079(excitatory postsynaptic potential);GO:0034220(ion transmembrane transport);GO:0006811(ion transport);GO:0006810(transport);GO:0022848(acetylcholine-gated cation-selective channel activity);GO:0005230(extracellular li…	04080(Neuroactive ligand-receptor interaction);04725(Cholinergic synapse);05033(Nicotine addiction)			cholinergic receptor, nicotinic, alpha polypeptide 4 [Source:MGI Symbol;Acc:MGI:87888]	0.01	0.01	0	0.757724	0	1	1		No	No
ENSMUSG00000027579	Srms	ENSMUST00000016498	GO:0000166(nucleotide binding);GO:0004672(protein kinase activity);GO:0004713(protein tyrosine kinase activity);GO:0004715(non-membrane spanning protein tyrosine kinase activity);GO:0005524(ATP binding);GO:0016301(kinase activity);GO:0016740(transferase activity);GO:0006468(protein phosphorylation);GO:0016310(phosphorylation);GO:0038083(peptidyl-tyrosine autophosphorylation);GO:0005737(cytoplasm)				src-related kinase lacking C-terminal regulatory tyrosine and N-terminal myristylation sites [Source:MGI Symbol;Acc:MGI:101865]	0	0	0	0.757724	0				No	No
ENSMUSG00000027670	Ocstamp	ENSMUST00000029213	GO:0003674(molecular_function);GO:0030154(cell differentiation);GO:0034241(positive regulation of macrophage fusion);GO:0045672(positive regulation of osteoclast differentiation);GO:0071356(cellular response to tumor necrosis factor);GO:0071391(cellular response to estrogen stimulus);GO:0072674(multinuclear osteoclast differentiation);GO:0090290(positive regulation of osteoclast proliferation);GO…				osteoclast stimulatory transmembrane protein [Source:MGI Symbol;Acc:MGI:1921864]	0.3	0.22	-0.0916305	0.757724	-0.105579	0.915916	1	DOWN	No	No
ENSMUSG00000027674	Pex5l	ENSMUST00000194016	GO:0043235(receptor complex);GO:0031267(small GTPase binding);GO:0000268(peroxisome targeting sequence binding);GO:0005052(peroxisome matrix targeting signal-1 binding);GO:0005515(protein binding);GO:0016560(protein import into peroxisome matrix, docking);GO:0042391(regulation of membrane potential);GO:0043949(regulation of cAMP-mediated signaling);GO:0045185(maintenance of protein location);GO:0…				peroxisomal biogenesis factor 5-like [Source:MGI Symbol;Acc:MGI:1916672]	0.01	0	-0.0143553	0.757724	-0.0131974	0.98947	1	DOWN	No	No
ENSMUSG00000027692	Tnik	ENSMUST00000159236;ENSMUST00000160307;ENSMUST00000159733	GO:0006468(protein phosphorylation);GO:0005524(ATP binding);GO:0004674(protein serine/threonine kinase activity);GO:0004672(protein kinase activity);GO:0000166(nucleotide binding);GO:0004702(signal transducer, downstream of receptor, with serine/threonine kinase activity);GO:0005515(protein binding);GO:0016301(kinase activity);GO:0016740(transferase activity);GO:0001934(positive regulation of pro…				TRAF2 and NCK interacting kinase [Source:MGI Symbol;Acc:MGI:1916264]	0.04	0.03	-0.0139392	0.757724	-0.0131974	0.98947	1	DOWN	No	No
ENSMUSG00000027694	Gm8325	ENSMUST00000193411;ENSMUST00000099086					predicted pseudogene 8325 [Source:MGI Symbol;Acc:MGI:3644852]	0.56	16.28	3.46949	0.757724	20.7463	0	0	UP	Yes	Yes
ENSMUSG00000027702	Lrrc34	ENSMUST00000029252	GO:0003674(molecular_function);GO:0008150(biological_process);GO:0005575(cellular_component)				leucine rich repeat containing 34 [Source:MGI Symbol;Acc:MGI:1919077]	0.08	0.04	-0.0544478	0.757724	-0.0527896	0.9579	1	DOWN	No	No
ENSMUSG00000027716	Trpc3	ENSMUST00000029271;ENSMUST00000129322;ENSMUST00000133542	GO:0016021(integral component of membrane);GO:0016020(membrane);GO:0005887(integral component of plasma membrane);GO:1903244(positive regulation of cardiac muscle hypertrophy in response to stress);GO:0070588(calcium ion transmembrane transport);GO:0055085(transmembrane transport);GO:0051592(response to calcium ion);GO:0033198(response to ATP);GO:0010524(positive regulation of calcium ion transpo…				transient receptor potential cation channel, subfamily C, member 3 [Source:MGI Symbol;Acc:MGI:109526]	0.02	0	-0.0285692	0.757724	-0.0263948	0.978942	1	DOWN	No	No
ENSMUSG00000027762	Sucnr1	ENSMUST00000029326;ENSMUST00000195544	GO:0004871(signal transducer activity);GO:0004930(G-protein coupled receptor activity);GO:0007165(signal transduction);GO:0007186(G-protein coupled receptor signaling pathway);GO:0005886(plasma membrane);GO:0016020(membrane);GO:0016021(integral component of membrane);GO:0070062(extracellular exosome);GO:0070062(extracellular exosome)	04024(cAMP signaling pathway);04024(cAMP signaling pathway)			succinate receptor 1 [Source:MGI Symbol;Acc:MGI:1934135]	0	0	0	0.757724	0				No	No
[truncated: 19,998 more rows]
